# Supplementary material for: Phylogeographical Analysis Reveals the Historic Origin, Emergence, and Evolutionary Dynamics of Methicillin-Resistant Staphylococcus aureus ST228
Source: Front Microbiol. 2020 Aug 26;11:2063. doi: 10.3389/fmicb.2020.02063 (PMC7479193; doi:10.3389/fmicb.2020.02063)
Supplement: TABLE S1 — Metadata of the 530 MRSA isolates included in this study. [file Table_1.XLSX]

## Sheet: Sheet1
Isolate_ID	MLST	Spa_type	Isolation_Date	Country_of_origin	City	Collection	Included_in_BEAST_analysis	Total_Length	Number_of_Contigs	N50	Sequence_Source	ENA_Projet#
AT513	228	t041	2006-10-31	Austria		EU-SLR 2006 study	Yes	2896617	110	99333	This Study	PRJEB34863
AT514	228	t041	2006-10-27	Austria		EU-SLR 2006 study	Yes	2853864	83	116208	This Study	PRJEB34863
AT515	228	Not assigned	2006-11-15	Austria		EU-SLR 2006 study	Yes	2854497	89	107451	This Study	PRJEB34863
AT516	228	t041	2006-10-19	Austria		EU-SLR 2006 study	Yes	2839888	90	108409	This Study	PRJEB34863
AT517	228	t041	2006-11-16	Austria		EU-SLR 2006 study	Yes	2829421	79	129290	This Study	PRJEB34863
AT518	228	t041	2007-02-05	Austria		EU-SLR 2006 study	Yes	2853016	81	121497	This Study	PRJEB34863
AT520	228	t041	2007-01-31	Austria		EU-SLR 2006 study	Yes	2854772	87	110294	This Study	PRJEB34863
BE601	228	t041	2002-01-01	Belgium		Hôpital Erasme, Belgium	Yes	2856826	86	106050	This Study	PRJEB34863
BE602	228	t041	2002-01-01	Belgium		Hôpital Erasme, Belgium	Yes	2856579	93	106228	This Study	PRJEB34863
BE603	228	t041	2002-01-01	Belgium		Hôpital Erasme, Belgium	Yes	2848418	82	110239	This Study	PRJEB34863
BE604	228	t041	2002-01-01	Belgium		Hôpital Erasme, Belgium	Yes	2856853	79	115070	This Study	PRJEB34863
BE605	228	t041	2002-01-01	Belgium		Hôpital Erasme, Belgium	Yes	2857741	87	106356	This Study	PRJEB34863
BE606	228	Not assigned	2002-01-01	Belgium		Hôpital Erasme, Belgium	Yes	2857508	85	106258	This Study	PRJEB34863
BE607	228	t041	2002-01-01	Belgium		Hôpital Erasme, Belgium	Yes	2894519	100	96865	This Study	PRJEB34863
BE608	228	t041	2002-01-01	Belgium		Hôpital Erasme, Belgium	Yes	2855546	82	116195	This Study	PRJEB34863
BE609	228	t892	2002-01-01	Belgium		Hôpital Erasme, Belgium	Yes	2856049	89	115249	This Study	PRJEB34863
BE610	228	t041	2002-01-01	Belgium		Hôpital Erasme, Belgium	Yes	2856203	94	96886	This Study	PRJEB34863
BE611	228	t041	2002-01-01	Belgium		Hôpital Erasme, Belgium	Yes	2858144	83	108548	This Study	PRJEB34863
BG560	228	t041	2007-01-29	Bulgaria		EU-SLR 2006 study	Yes	2885743	89	116201	This Study	PRJEB34863
CZ575	111	t041	2011-03-11	Czech Republic	Prague	EU-SLR 2011 study	Yes	2856773	95	108531	This Study	PRJEB34863
DE509	111	t041	2007-01-25	Germany		EU-SLR 2006 study	Yes	2829872	75	109767	This Study	PRJEB34863
DE801	228	t001	1997-01-01	Germany	Bremen	RKI Germany	Yes	2744603	90	124488	This Study	PRJEB34863
DE802	228	t001	1997-01-01	Germany	Wernigerode	RKI Germany	Yes	2774837	82	94454	This Study	PRJEB34863
DE803	228	t001	1997-01-01	Germany	Berlin	RKI Germany	Yes	2844426	81	144709	This Study	PRJEB34863
DE804	228	t001	1997-01-01	Germany	Potsdam	RKI Germany	Yes	2797985	93	99434	This Study	PRJEB34863
DE805	228	t001	1999-01-01	Germany	Mönchengladbach	RKI Germany	Yes	2855102	77	168196	This Study	PRJEB34863
DE806	228	t001	2002-01-01	Germany	Osnabrück	RKI Germany	Yes	2905402	104	103545	This Study	PRJEB34863
DE807	228	t001	2004-01-01	Germany	Wuppertal	RKI Germany	Yes	2853389	91	110957	This Study	PRJEB34863
DE808	228	t001	2005-01-01	Germany	Halle	RKI Germany	Yes	2858229	86	108393	This Study	PRJEB34863
DE809	111	t041	2005-01-01	Germany	Bad Berka	RKI Germany	Yes	2843711	79	108405	This Study	PRJEB34863
DE810	228	t001	2006-01-01	Germany	Murnau	RKI Germany	Yes	2822386	85	108874	This Study	PRJEB34863
DE811	228	t001	2006-01-01	Germany	Plauen	RKI Germany	Yes	2875841	117	104067	This Study	PRJEB34863
DE812	228	t001	2006-01-01	Germany	Augsburg	RKI Germany	Yes	2885725	109	116091	This Study	PRJEB34863
DE813	228	t001	2006-01-01	Germany	Rheinbach	RKI Germany	Yes	2828331	114	103443	This Study	PRJEB34863
DE814	228	t001	2006-01-01	Germany	Stuttgart	RKI Germany	Yes	2844789	79	155254	This Study	PRJEB34863
DE815	228	t001	2006-01-01	Germany	Hamburg	RKI Germany	Yes	2879779	126	106508	This Study	PRJEB34863
DE816	111	t041	2006-01-01	Germany	Murnau	RKI Germany	Yes	2847701	79	99345	This Study	PRJEB34863
DE817	111	t041	2006-01-01	Germany	Leipzig	RKI Germany	Yes	2849158	80	108536	This Study	PRJEB34863
DE818	111	t041	2006-01-01	Germany	Rheinbach	RKI Germany	Yes	2849759	93	99313	This Study	PRJEB34863
DE819	111	t041	2006-01-01	Germany	Rheinbach	RKI Germany	Yes	2850175	78	110066	This Study	PRJEB34863
DE820	111	t041	2006-01-01	Germany	Süsel	RKI Germany	Yes	2814674	80	115249	This Study	PRJEB34863
DE821	228	t001	2007-01-01	Germany	Eutin	RKI Germany	Yes	2852765	103	96349	This Study	PRJEB34863
DE822	111	t041	2007-01-01	Germany	Bad Wildungen	RKI Germany	Yes	2857347	82	114648	This Study	PRJEB34863
DE823	111	t041	2007-01-01	Germany	Süsel	RKI Germany	Yes	2813067	83	114725	This Study	PRJEB34863
DE824	228	t001	2008-01-01	Germany	Kiel	RKI Germany	Yes	2844591	95	103492	This Study	PRJEB34863
DE825	228	t001	2008-01-01	Germany	Dresden	RKI Germany	Yes	2850623	86	108500	This Study	PRJEB34863
DE826	228	t001	2008-01-01	Germany	Wiesbaden	RKI Germany	Yes	2792743	75	128107	This Study	PRJEB34863
DE827	228	t001	2010-01-01	Germany	Wuppertal-Barmen	RKI Germany	Yes	2888421	104	108510	This Study	PRJEB34863
DE828	111	t041	2011-01-01	Germany	München	RKI Germany	Yes	2825161	77	109772	This Study	PRJEB34863
DE829	111	t041	2012-01-01	Germany	Gera	RKI Germany	Yes	2845142	81	109771	This Study	PRJEB34863
ES536	228	t041	2007-02-23	Spain		EU-SLR 2006 study	No	2855500	83	110398	This Study	PRJEB34863
FI535	228	t041	2006-10-14	Finland		EU-SLR 2006 study	No	2899748	85	116205	This Study	PRJEB34863
Ge301	228	t041	1999-12-13	Switzerland	Geneva	University hospitals of Geneva	Yes	2887179	115	99400	This Study	PRJEB34863
Ge302	228	t041	1999-12-15	Switzerland	Geneva	University hospitals of Geneva	Yes	2887309	110	94326	This Study	PRJEB34863
Ge303	228	t001	1999-12-16	Switzerland	Geneva	University hospitals of Geneva	Yes	2886567	128	108173	This Study	PRJEB34863
Ge304	228	t041	1999-12-17	Switzerland	Geneva	University hospitals of Geneva	No	2887825	122	111916	This Study	PRJEB34863
Ge305	228	t041	1999-12-17	Switzerland	Geneva	University hospitals of Geneva	Yes	2887471	125	93858	This Study	PRJEB34863
Ge306	228	t001	1999-12-17	Switzerland	Geneva	University hospitals of Geneva	No	2889255	116	94330	This Study	PRJEB34863
Ge307	228	t041	1999-12-18	Switzerland	Geneva	University hospitals of Geneva	No	2889823	114	115192	This Study	PRJEB34863
Ge308	228	Not assigned	1999-12-18	Switzerland	Geneva	University hospitals of Geneva	Yes	2878892	107	115189	This Study	PRJEB34863
Ge309	228	t041	1999-12-18	Switzerland	Geneva	University hospitals of Geneva	Yes	2888718	106	115249	This Study	PRJEB34863
Ge310	228	t041	2000-06-21	Switzerland	Geneva	University hospitals of Geneva	Yes	2890117	114	94330	This Study	PRJEB34863
Ge311	228	t041	2000-06-22	Switzerland	Geneva	University hospitals of Geneva	No	2882134	119	110279	This Study	PRJEB34863
Ge312	228	t041	2000-06-22	Switzerland	Geneva	University hospitals of Geneva	Yes	2889630	116	99333	This Study	PRJEB34863
Ge313	228	t041	2000-06-22	Switzerland	Geneva	University hospitals of Geneva	No	2925895	128	96650	This Study	PRJEB34863
Ge314	228	t041	2000-06-23	Switzerland	Geneva	University hospitals of Geneva	No	2890213	110	99333	This Study	PRJEB34863
Ge315	228	t892	2000-06-23	Switzerland	Geneva	University hospitals of Geneva	Yes	2888720	121	93670	This Study	PRJEB34863
Ge316	228	t892	2000-06-23	Switzerland	Geneva	University hospitals of Geneva	No	2888987	109	99321	This Study	PRJEB34863
Ge318	228	t041	2000-06-27	Switzerland	Geneva	University hospitals of Geneva	No	2888035	123	99313	This Study	PRJEB34863
Ge319	228	t041	2001-06-13	Switzerland	Geneva	University hospitals of Geneva	Yes	2925316	124	98179	This Study	PRJEB34863
Ge320	228	t041	2001-06-13	Switzerland	Geneva	University hospitals of Geneva	Yes	2817941	116	108173	This Study	PRJEB34863
Ge321	228	t892	2001-06-13	Switzerland	Geneva	University hospitals of Geneva	Yes	2890607	122	88526	This Study	PRJEB34863
Ge322	228	t001	2001-06-13	Switzerland	Geneva	University hospitals of Geneva	No	2865182	116	116054	This Study	PRJEB34863
Ge323	228	t041	2001-06-14	Switzerland	Geneva	University hospitals of Geneva	No	2865409	117	99325	This Study	PRJEB34863
Ge324	228	t041	2001-06-14	Switzerland	Geneva	University hospitals of Geneva	No	2888294	112	93634	This Study	PRJEB34863
Ge325	228	t041	2001-06-14	Switzerland	Geneva	University hospitals of Geneva	No	2872803	105	108137	This Study	PRJEB34863
Ge326	228	t041	2001-06-15	Switzerland	Geneva	University hospitals of Geneva	No	2889880	114	99337	This Study	PRJEB34863
Ge327	228	t041	2001-06-15	Switzerland	Geneva	University hospitals of Geneva	No	2909789	106	108133	This Study	PRJEB34863
Ge328	228	t041	2002-12-28	Switzerland	Geneva	University hospitals of Geneva	Yes	2886972	120	96761	This Study	PRJEB34863
Ge329	228	t041	2002-12-29	Switzerland	Geneva	University hospitals of Geneva	Yes	2928991	130	94338	This Study	PRJEB34863
Ge330	228	Not assigned	2002-12-29	Switzerland	Geneva	University hospitals of Geneva	No	2926108	130	99337	This Study	PRJEB34863
Ge331	228	t041	2002-12-29	Switzerland	Geneva	University hospitals of Geneva	No	2885522	111	104401	This Study	PRJEB34863
Ge332	228	t041	2002-12-30	Switzerland	Geneva	University hospitals of Geneva	No	2886123	116	116187	This Study	PRJEB34863
Ge333	228	t892	2002-12-30	Switzerland	Geneva	University hospitals of Geneva	No	2889521	114	88534	This Study	PRJEB34863
Ge334	228	t892	2002-12-31	Switzerland	Geneva	University hospitals of Geneva	Yes	2891016	126	77093	This Study	PRJEB34863
Ge335	228	t041	2002-12-31	Switzerland	Geneva	University hospitals of Geneva	No	2889699	117	94346	This Study	PRJEB34863
Ge336	228	t041	2003-01-01	Switzerland	Geneva	University hospitals of Geneva	Yes	2850724	110	93950	This Study	PRJEB34863
Ge337	228	t041	2003-01-01	Switzerland	Geneva	University hospitals of Geneva	No	2850955	97	94420	This Study	PRJEB34863
Ge338	228	t041	2003-11-02	Switzerland	Geneva	University hospitals of Geneva	No	2877760	108	116193	This Study	PRJEB34863
Ge339	228	t041	2003-11-03	Switzerland	Geneva	University hospitals of Geneva	Yes	2923746	135	94338	This Study	PRJEB34863
Ge340	228	t041	2003-11-04	Switzerland	Geneva	University hospitals of Geneva	Yes	2887697	116	94025	This Study	PRJEB34863
Ge341	228	t10375	2003-11-04	Switzerland	Geneva	University hospitals of Geneva	No	2891270	123	88530	This Study	PRJEB34863
Ge342	228	t041	2003-11-04	Switzerland	Geneva	University hospitals of Geneva	No	2889565	112	110555	This Study	PRJEB34863
Ge343	228	t041	2003-11-05	Switzerland	Geneva	University hospitals of Geneva	No	2882078	117	116183	This Study	PRJEB34863
Ge344	228	t041	2003-11-05	Switzerland	Geneva	University hospitals of Geneva	No	2882087	123	94314	This Study	PRJEB34863
Ge345	228	t045	2003-11-05	Switzerland	Geneva	University hospitals of Geneva	Yes	2872377	125	93914	This Study	PRJEB34863
Ge346	228	t041	2004-12-27	Switzerland	Geneva	University hospitals of Geneva	No	2886538	120	99333	This Study	PRJEB34863
Ge347	228	t045	2004-12-28	Switzerland	Geneva	University hospitals of Geneva	No	2872859	116	96667	This Study	PRJEB34863
Ge348	228	t041	2004-12-29	Switzerland	Geneva	University hospitals of Geneva	No	2889023	123	94377	This Study	PRJEB34863
Ge349	228	Not assigned	2004-12-29	Switzerland	Geneva	University hospitals of Geneva	No	2924523	126	104393	This Study	PRJEB34863
Ge350	228	t041	2004-12-30	Switzerland	Geneva	University hospitals of Geneva	Yes	2885816	112	104293	This Study	PRJEB34863
Ge351	228	t041	2004-12-30	Switzerland	Geneva	University hospitals of Geneva	No	2918715	122	106021	This Study	PRJEB34863
Ge352	228	t041	2004-12-30	Switzerland	Geneva	University hospitals of Geneva	No	2919942	126	88521	This Study	PRJEB34863
Ge353	228	t041	2004-12-30	Switzerland	Geneva	University hospitals of Geneva	Yes	2901825	102	88461	This Study	PRJEB34863
Ge354	228	t041	2004-12-30	Switzerland	Geneva	University hospitals of Geneva	No	2888395	117	96661	This Study	PRJEB34863
Ge355	228	t041	2005-01-01	Switzerland	Geneva	University hospitals of Geneva	No	2918778	117	116196	This Study	PRJEB34863
Ge356	228	t041	2005-01-03	Switzerland	Geneva	University hospitals of Geneva	No	2890384	115	96739	This Study	PRJEB34863
Ge357	228	t041	2005-01-03	Switzerland	Geneva	University hospitals of Geneva	No	2927287	130	99437	This Study	PRJEB34863
Ge358	228	t041	2005-01-03	Switzerland	Geneva	University hospitals of Geneva	No	2888258	125	96762	This Study	PRJEB34863
Ge359	228	t12325	2005-01-03	Switzerland	Geneva	University hospitals of Geneva	Yes	2881310	132	116169	This Study	PRJEB34863
Ge360	228	t4313	2005-01-04	Switzerland	Geneva	University hospitals of Geneva	No	2926884	138	94392	This Study	PRJEB34863
Ge361	228	t041	2005-01-04	Switzerland	Geneva	University hospitals of Geneva	No	2923851	131	93522	This Study	PRJEB34863
Ge362	228	t041	2005-01-04	Switzerland	Geneva	University hospitals of Geneva	Yes	2885008	120	94314	This Study	PRJEB34863
Ge363	228	t041	2005-01-04	Switzerland	Geneva	University hospitals of Geneva	No	2885904	119	88514	This Study	PRJEB34863
Ge364	228	t045	2005-01-05	Switzerland	Geneva	University hospitals of Geneva	Yes	2873921	112	94441	This Study	PRJEB34863
Ge365	228	t041	2006-02-14	Switzerland	Geneva	University hospitals of Geneva	Yes	2908214	122	106353	This Study	PRJEB34863
Ge366	228	t041	2006-02-21	Switzerland	Geneva	University hospitals of Geneva	No	2918734	142	94327	This Study	PRJEB34863
Ge367	228	t041	2006-02-21	Switzerland	Geneva	University hospitals of Geneva	Yes	2918256	131	111934	This Study	PRJEB34863
Ge368	228	t041	2006-02-22	Switzerland	Geneva	University hospitals of Geneva	No	2915604	143	99404	This Study	PRJEB34863
Ge369	228	t041	2006-02-25	Switzerland	Geneva	University hospitals of Geneva	No	2918861	140	93879	This Study	PRJEB34863
Ge370	Not assigned	t041	2007-12-01	Switzerland	Geneva	University hospitals of Geneva	No	2913911	152	88517	This Study	PRJEB34863
Ge371	228	t041	2007-12-04	Switzerland	Geneva	University hospitals of Geneva	Yes	2915175	128	88513	This Study	PRJEB34863
Ge372	228	t041	2007-12-06	Switzerland	Geneva	University hospitals of Geneva	Yes	2919595	127	76920	This Study	PRJEB34863
Ge373	228	t041	2007-12-08	Switzerland	Geneva	University hospitals of Geneva	No	2918834	128	94337	This Study	PRJEB34863
Ge374	228	t041	2007-12-08	Switzerland	Geneva	University hospitals of Geneva	No	2917040	125	99325	This Study	PRJEB34863
Ge375	228	t041	2007-12-10	Switzerland	Geneva	University hospitals of Geneva	Yes	2875186	116	102405	This Study	PRJEB34863
Ge377	228	t041	2007-12-11	Switzerland	Geneva	University hospitals of Geneva	Yes	2921659	165	94310	This Study	PRJEB34863
Ge378	228	Not assigned	2007-12-11	Switzerland	Geneva	University hospitals of Geneva	No	2918280	130	96774	This Study	PRJEB34863
Ge379	228	t041	2008-12-22	Switzerland	Geneva	University hospitals of Geneva	Yes	2919905	121	96718	This Study	PRJEB34863
Ge380	228	Not assigned	2008-12-25	Switzerland	Geneva	University hospitals of Geneva	No	2917140	127	96704	This Study	PRJEB34863
Ge381	228	t041	2008-12-26	Switzerland	Geneva	University hospitals of Geneva	Yes	2884230	111	108399	This Study	PRJEB34863
Ge382	228	t041	2008-12-26	Switzerland	Geneva	University hospitals of Geneva	No	2912870	156	99321	This Study	PRJEB34863
Ge383	228	t041	2008-12-27	Switzerland	Geneva	University hospitals of Geneva	Yes	2918176	126	99329	This Study	PRJEB34863
Ge384	228	t041	2008-12-27	Switzerland	Geneva	University hospitals of Geneva	No	2917162	129	106426	This Study	PRJEB34863
Ge385	228	t041	2008-12-29	Switzerland	Geneva	University hospitals of Geneva	No	2917411	124	99321	This Study	PRJEB34863
Ge386	228	t041	2008-12-29	Switzerland	Geneva	University hospitals of Geneva	No	2915736	133	106270	This Study	PRJEB34863
Ge387	228	t001	2008-12-31	Switzerland	Geneva	University hospitals of Geneva	No	2891362	151	94330	This Study	PRJEB34863
Ge388	228	t041	2009-02-23	Switzerland	Geneva	University hospitals of Geneva	Yes	2918234	125	108185	This Study	PRJEB34863
Ge389	228	t7354	2009-02-27	Switzerland	Geneva	University hospitals of Geneva	Yes	2915818	124	106267	This Study	PRJEB34863
Ge390	228	t041	2009-03-05	Switzerland	Geneva	University hospitals of Geneva	No	2918021	147	110408	This Study	PRJEB34863
Ge391	228	t041	2009-03-05	Switzerland	Geneva	University hospitals of Geneva	Yes	2915836	152	88521	This Study	PRJEB34863
Ge392	228	t041	2009-03-06	Switzerland	Geneva	University hospitals of Geneva	No	2880983	132	96661	This Study	PRJEB34863
Ge393	228	t041	2009-03-06	Switzerland	Geneva	University hospitals of Geneva	Yes	2882373	130	109806	This Study	PRJEB34863
Ge394	228	t041	2009-03-09	Switzerland	Geneva	University hospitals of Geneva	No	2915277	128	106258	This Study	PRJEB34863
Ge395	228	t041	2009-03-09	Switzerland	Geneva	University hospitals of Geneva	No	2881722	105	99333	This Study	PRJEB34863
Ge396	228	Not assigned	2009-03-10	Switzerland	Geneva	University hospitals of Geneva	No	2916333	130	105943	This Study	PRJEB34863
Ge397	228	t041	2010-05-14	Switzerland	Geneva	University hospitals of Geneva	Yes	2880276	119	108476	This Study	PRJEB34863
Ge398	228	t041	2011-03-21	Switzerland	Geneva	University hospitals of Geneva	Yes	2883860	103	109126	This Study	PRJEB34863
Ge399	228	Not assigned	2011-04-12	Switzerland	Geneva	University hospitals of Geneva	Yes	2892574	116	108181	This Study	PRJEB34863
Ge400	228	t041	2011-04-12	Switzerland	Geneva	University hospitals of Geneva	No	2916263	125	108197	This Study	PRJEB34863
Ge401	228	t041	2011-04-15	Switzerland	Geneva	University hospitals of Geneva	Yes	2874236	110	91291	This Study	PRJEB34863
Ge402	228	t041	2011-04-15	Switzerland	Geneva	University hospitals of Geneva	No	2833482	123	99337	This Study	PRJEB34863
Ge403	228	t041	2011-04-18	Switzerland	Geneva	University hospitals of Geneva	No	2918122	125	99321	This Study	PRJEB34863
Ge404	228	t041	2011-04-18	Switzerland	Geneva	University hospitals of Geneva	Yes	2883627	113	108256	This Study	PRJEB34863
Ge405	228	t041	2011-05-07	Switzerland	Geneva	University hospitals of Geneva	Yes	2865461	127	99332	This Study	PRJEB34863
Ge406	228	t041	2011-05-12	Switzerland	Geneva	University hospitals of Geneva	Yes	2917413	118	108185	This Study	PRJEB34863
Ge407	228	t041	2012-06-12	Switzerland	Geneva	University hospitals of Geneva	Yes	2882080	111	108181	This Study	PRJEB34863
Ge408	228	Not assigned	2012-06-22	Switzerland	Geneva	University hospitals of Geneva	Yes	2919613	123	106279	This Study	PRJEB34863
Ge409	228	t041	2012-08-17	Switzerland	Geneva	University hospitals of Geneva	Yes	2874673	113	94325	This Study	PRJEB34863
Ge410	228	Not assigned	2012-08-21	Switzerland	Geneva	University hospitals of Geneva	No	2863893	130	94753	This Study	PRJEB34863
Ge411	228	t041	2012-09-05	Switzerland	Geneva	University hospitals of Geneva	No	2917799	121	106408	This Study	PRJEB34863
Ge412	228	t041	2012-09-27	Switzerland	Geneva	University hospitals of Geneva	Yes	2860398	110	110223	This Study	PRJEB34863
Ge413	228	t041	2012-10-12	Switzerland	Geneva	University hospitals of Geneva	No	2881891	106	109054	This Study	PRJEB34863
Ge414	228	Not assigned	2012-10-12	Switzerland	Geneva	University hospitals of Geneva	Yes	2855381	99	94334	This Study	PRJEB34863
Ge415	228	t041	2012-10-16	Switzerland	Geneva	University hospitals of Geneva	No	2825809	116	76908	This Study	PRJEB34863
Ge416	228	t041	2012-10-19	Switzerland	Geneva	University hospitals of Geneva	Yes	2883026	100	109082	This Study	PRJEB34863
HR522	111	t041	2006-10-12	Croatia		EU-SLR 2006 study	Yes	2821671	80	104225	This Study	PRJEB34863
HR523	111	t041	2006-09-30	Croatia		EU-SLR 2006 study	Yes	2781207	89	94350	This Study	PRJEB34863
HR524	111	Not assigned	2006-09-07	Croatia		EU-SLR 2006 study	Yes	2850702	90	104593	This Study	PRJEB34863
HR525	111	t041	2006-09-23	Croatia		EU-SLR 2006 study	Yes	2782439	97	107745	This Study	PRJEB34863
HR526	111	t041	2006-09-24	Croatia		EU-SLR 2006 study	Yes	2779558	87	108413	This Study	PRJEB34863
HR527	111	t041	2006-10-16	Croatia		EU-SLR 2006 study	Yes	2778364	87	108401	This Study	PRJEB34863
HR528	111	t041	2006-09-23	Croatia		EU-SLR 2006 study	Yes	2842175	89	109755	This Study	PRJEB34863
HR529	111	t041	2006-10-21	Croatia		EU-SLR 2006 study	Yes	2847627	84	109755	This Study	PRJEB34863
HR530	111	Not assigned	2006-12-04	Croatia		EU-SLR 2006 study	Yes	2859008	96	88885	This Study	PRJEB34863
HR531	111	t041	2006-09-04	Croatia		EU-SLR 2006 study	Yes	2823567	75	116213	This Study	PRJEB34863
HR532	111	t041	2007-02-16	Croatia		EU-SLR 2006 study	Yes	2859063	91	98145	This Study	PRJEB34863
HR533	111	t041	2006-10-13	Croatia		EU-SLR 2006 study	Yes	2858793	97	94342	This Study	PRJEB34863
HR534	111	t041	2007-10-01	Croatia		EU-SLR 2006 study	Yes	2850240	86	102316	This Study	PRJEB34863
HU578	228	t041	2011-01-13	Hungary	Budapest	EU-SLR 2011 study	No	2867066	96	103374	This Study	PRJEB34863
IT537	228	t041	2006-10-18	Italy		EU-SLR 2006 study	Yes	2876354	122	116193	This Study	PRJEB34863
IT538	228	t041	2006-12-14	Italy		EU-SLR 2006 study	Yes	2857086	82	110462	This Study	PRJEB34863
IT539	228	t041	2006-09-07	Italy		EU-SLR 2006 study	Yes	2849344	105	114158	This Study	PRJEB34863
IT540	228	t041	2006-09-09	Italy		EU-SLR 2006 study	Yes	2844978	89	116201	This Study	PRJEB34863
IT542	228	t041	2006-09-29	Italy		EU-SLR 2006 study	Yes	2890636	116	108408	This Study	PRJEB34863
IT543	228	t041	2006-10-05	Italy		EU-SLR 2006 study	Yes	2841184	86	112176	This Study	PRJEB34863
IT544	111	t041	2006-10-26	Italy		EU-SLR 2006 study	Yes	2851336	80	110966	This Study	PRJEB34863
IT545	111	t041	2006-10-04	Italy		EU-SLR 2006 study	Yes	2854719	87	116210	This Study	PRJEB34863
IT547	228	t041	2007-01-15	Italy		EU-SLR 2006 study	Yes	2860853	106	99389	This Study	PRJEB34863
IT548	228	t041	2007-01-22	Italy		EU-SLR 2006 study	Yes	2877130	134	99337	This Study	PRJEB34863
IT549	228	t041	2006-11-06	Italy		EU-SLR 2006 study	Yes	2851669	112	107191	This Study	PRJEB34863
IT550	228	t041	2006-11-27	Italy		EU-SLR 2006 study	Yes	2849211	88	102243	This Study	PRJEB34863
IT551	228	t041	2006-10-25	Italy	Milan	EU-SLR 2006 study	No	2813280	85	115247	This Study	PRJEB34863
IT552	228	t041	2007-01-20	Italy		EU-SLR 2006 study	Yes	2811693	78	99333	This Study	PRJEB34863
IT553	228	t041	2006-11-20	Italy		EU-SLR 2006 study	Yes	2884745	107	108486	This Study	PRJEB34863
IT554	228	t041	2006-09-23	Italy		EU-SLR 2006 study	Yes	2814655	84	113500	This Study	PRJEB34863
IT555	228	t041	2007-02-06	Italy		EU-SLR 2006 study	Yes	2898114	124	98102	This Study	PRJEB34863
IT556	228	t041	2006-09-15	Italy		EU-SLR 2006 study	Yes	2850860	148	99321	This Study	PRJEB34863
IT557	228	t041	2006-09-29	Italy		EU-SLR 2006 study	Yes	2852129	101	99345	This Study	PRJEB34863
IT558	228	t041	2006-10-31	Italy		EU-SLR 2006 study	Yes	2887471	86	110138	This Study	PRJEB34863
IT559	228	t041	2006-11-06	Italy		EU-SLR 2006 study	Yes	2889250	113	102500	This Study	PRJEB34863
IT563	228	t041	2011-03-03	Italy	Rome	EU-SLR 2011 study	Yes	2905040	103	83703	This Study	PRJEB34863
IT564	228	t041	2011-03-24	Italy	Rome	EU-SLR 2011 study	No	2857573	89	102657	This Study	PRJEB34863
IT565	228	t041	2011-03-14	Italy	Rome	EU-SLR 2011 study	Yes	2793542	91	94347	This Study	PRJEB34863
IT566	228	t041	2011-03-18	Italy	Rome	EU-SLR 2011 study	Yes	2901168	107	96876	This Study	PRJEB34863
IT567	228	t041	2011-01-19	Italy	Rome	EU-SLR 2011 study	No	2856168	96	99329	This Study	PRJEB34863
IT568	228	t041	2011-02-07	Italy	Rome	EU-SLR 2011 study	Yes	2856321	90	108524	This Study	PRJEB34863
IT569	228	t041	2011-03-17	Italy	Rome	EU-SLR 2011 study	Yes	2830010	98	108388	This Study	PRJEB34863
IT570	228	t041	2011-03-20	Italy	Cuneo	EU-SLR 2011 study	Yes	2824333	89	99337	This Study	PRJEB34863
IT571	228	t041	2011-02-19	Italy	Rome	EU-SLR 2011 study	Yes	2893450	110	102681	This Study	PRJEB34863
IT572	228	t041	2011-02-03	Italy	Rome	EU-SLR 2011 study	Yes	2922840	137	88540	This Study	PRJEB34863
IT573	228	t041	2011-03-21	Italy	Rome	EU-SLR 2011 study	Yes	2907836	92	99337	This Study	PRJEB34863
IT574	228	t041	2011-05-21	Italy	Sassari	EU-SLR 2011 study	Yes	2901417	93	116205	This Study	PRJEB34863
IT701	111	t041	2007-04-03	Italy	BERGAMO	Italy Pantosti	Yes	2878413	101	115257	This Study	PRJEB34863
IT702	228	t041	2010-06-18	Italy	MANERBIO	Italy Pantosti	Yes	2897722	125	90417	This Study	PRJEB34863
IT703	228	t041	2009-08-26	Italy	BOLOGNA	Italy Pantosti	Yes	2877443	84	116201	This Study	PRJEB34863
IT704	228	t041	2009-09-22	Italy	BOLOGNA	Italy Pantosti	No	2891102	91	99415	This Study	PRJEB34863
IT705	228	t041	2009-09-22	Italy	REGGIO EMILIA	Italy Pantosti	Yes	2853326	100	97144	This Study	PRJEB34863
IT707	228	t041	2009-09-04	Italy	MODENA	Italy Pantosti	Yes	2840671	90	88514	This Study	PRJEB34863
IT708	228	t041	2009-09-27	Italy	IMOLA	Italy Pantosti	Yes	2872250	92	92095	This Study	PRJEB34863
IT709	228	t041	2009-09-09	Italy	IMOLA	Italy Pantosti	No	2857757	100	98185	This Study	PRJEB34863
IT710	228	t041	2009-09-22	Italy	PIACENZA	Italy Pantosti	Yes	2873281	82	116283	This Study	PRJEB34863
IT711	228	t041	2009-09-27	Italy	BOLOGNA	Italy Pantosti	No	2889119	86	116217	This Study	PRJEB34863
IT712	228	t041	2009-05-21	Italy	RAVENNA	Italy Pantosti	Yes	2853058	104	99345	This Study	PRJEB34863
La001	228	t041	2000-01-10	Switzerland	Lausanne	University hospital of Lausanne	Yes	2874220	100	108133	This Study	PRJEB34863
La002	228	t041	2000-01-24	Switzerland	Lausanne	University hospital of Lausanne	No	2816607	138	89553	This Study	PRJEB34863
La003	228	t041	2000-03-01	Switzerland	Lausanne	University hospital of Lausanne	No	2885961	134	96664	This Study	PRJEB34863
La004	228	t041	2000-06-13	Switzerland	Lausanne	University hospital of Lausanne	No	2887100	121	108181	This Study	PRJEB34863
La005	228	t041	2000-07-23	Switzerland	Lausanne	University hospital of Lausanne	No	2895714	101	106278	This Study	PRJEB34863
La006	228	t041	2000-08-23	Switzerland	Lausanne	University hospital of Lausanne	Yes	2886781	125	96667	This Study	PRJEB34863
La008	228	t041	2001-02-23	Switzerland	Lausanne	University hospital of Lausanne	Yes	2885160	146	96844	This Study	PRJEB34863
La009	228	t041	2001-03-02	Switzerland	Lausanne	University hospital of Lausanne	No	2886745	134	94306	This Study	PRJEB34863
La010	228	t041	2001-03-20	Switzerland	Lausanne	University hospital of Lausanne	No	2885548	125	106367	This Study	PRJEB34863
La011	228	t041	2001-04-13	Switzerland	Lausanne	University hospital of Lausanne	No	2886857	129	106261	This Study	PRJEB34863
La012	228	t041	2001-04-24	Switzerland	Lausanne	University hospital of Lausanne	Yes	2886402	129	94330	This Study	PRJEB34863
La013	228	t041	2001-05-10	Switzerland	Lausanne	University hospital of Lausanne	No	2887158	133	108169	This Study	PRJEB34863
La014	228	t041	2001-06-03	Switzerland	Lausanne	University hospital of Lausanne	No	2886382	118	99333	This Study	PRJEB34863
La015	228	t041	2001-07-23	Switzerland	Lausanne	University hospital of Lausanne	Yes	2884463	122	108181	This Study	PRJEB34863
La016	228	t041	2001-09-19	Switzerland	Lausanne	University hospital of Lausanne	No	2883993	122	94318	This Study	PRJEB34863
La017	228	t041	2001-10-18	Switzerland	Lausanne	University hospital of Lausanne	No	2883132	132	93380	This Study	PRJEB34863
La018	228	t041	2001-11-05	Switzerland	Lausanne	University hospital of Lausanne	No	2884040	131	99309	This Study	PRJEB34863
La019	228	t041	2001-11-26	Switzerland	Lausanne	University hospital of Lausanne	No	2886530	123	96660	This Study	PRJEB34863
La020	228	t041	2002-01-09	Switzerland	Lausanne	University hospital of Lausanne	Yes	2886181	132	100971	This Study	PRJEB34863
La021	228	t041	2002-02-21	Switzerland	Lausanne	University hospital of Lausanne	No	2885059	119	94379	This Study	PRJEB34863
La022	228	Not assigned	2002-04-23	Switzerland	Lausanne	University hospital of Lausanne	No	2888189	121	94338	This Study	PRJEB34863
La023	228	t041	2002-06-27	Switzerland	Lausanne	University hospital of Lausanne	No	2815314	121	99337	This Study	PRJEB34863
La024	228	t041	2002-08-06	Switzerland	Lausanne	University hospital of Lausanne	No	2816497	139	96653	This Study	PRJEB34863
La025	228	t10375	2002-10-31	Switzerland	Lausanne	University hospital of Lausanne	Yes	2876372	142	93649	This Study	PRJEB34863
La026	228	t041	2003-03-07	Switzerland	Lausanne	University hospital of Lausanne	Yes	2864494	147	88600	This Study	PRJEB34863
La027	228	t041	2003-06-06	Switzerland	Lausanne	University hospital of Lausanne	No	2885002	127	96742	This Study	PRJEB34863
La028	228	t041	2003-08-09	Switzerland	Lausanne	University hospital of Lausanne	Yes	2885122	116	106189	This Study	PRJEB34863
La029	228	t041	2003-10-02	Switzerland	Lausanne	University hospital of Lausanne	No	2885144	119	109677	This Study	PRJEB34863
La030	228	t041	2003-10-09	Switzerland	Lausanne	University hospital of Lausanne	No	2884019	123	110098	This Study	PRJEB34863
La031	228	t041	2003-11-24	Switzerland	Lausanne	University hospital of Lausanne	Yes	2884429	118	110114	This Study	PRJEB34863
La032	228	t041	2004-02-03	Switzerland	Lausanne	University hospital of Lausanne	Yes	2886238	122	99325	This Study	PRJEB34863
La033	228	t041	2004-03-10	Switzerland	Lausanne	University hospital of Lausanne	No	2888504	121	108271	This Study	PRJEB34863
La034	228	t041	2004-04-23	Switzerland	Lausanne	University hospital of Lausanne	No	2884365	143	96644	This Study	PRJEB34863
La035	228	t041	2004-05-25	Switzerland	Lausanne	University hospital of Lausanne	No	2885646	118	110118	This Study	PRJEB34863
La036	228	t041	2004-08-02	Switzerland	Lausanne	University hospital of Lausanne	No	2917191	128	109689	This Study	PRJEB34863
La037	228	t041	2004-12-04	Switzerland	Lausanne	University hospital of Lausanne	Yes	2860621	127	93660	This Study	PRJEB34863
La038	228	t041	2005-02-04	Switzerland	Lausanne	University hospital of Lausanne	Yes	2885829	130	99325	This Study	PRJEB34863
La039	228	t041	2005-09-01	Switzerland	Lausanne	University hospital of Lausanne	Yes	2869872	133	106156	This Study	PRJEB34863
La041	228	t041	2006-08-24	Switzerland	Lausanne	University hospital of Lausanne	No	2885289	139	96707	This Study	PRJEB34863
La042	228	t041	2006-09-24	Switzerland	Lausanne	University hospital of Lausanne	No	2891339	136	106268	This Study	PRJEB34863
La043	228	t041	2007-09-24	Switzerland	Lausanne	University hospital of Lausanne	No	2879804	129	94310	This Study	PRJEB34863
La044	228	t041	2007-12-26	Switzerland	Lausanne	University hospital of Lausanne	Yes	2853726	112	108197	Senn et al., 2016	PRJEB34139
La045	228	t041	2008-08-05	Switzerland	Lausanne	University hospital of Lausanne	No	2883454	130	104209	Senn et al., 2016	PRJEB34139
La046	228	t041	2008-09-03	Switzerland	Lausanne	University hospital of Lausanne	Yes	2880751	131	94330	Senn et al., 2016	PRJEB34139
La047	228	t041	2008-10-31	Switzerland	Lausanne	University hospital of Lausanne	No	2878014	137	87993	Senn et al., 2016	PRJEB34139
La048	228	t041	2008-11-12	Switzerland	Lausanne	University hospital of Lausanne	Yes	2879740	135	88517	Senn et al., 2016	PRJEB34139
La049	228	t041	2008-12-03	Switzerland	Lausanne	University hospital of Lausanne	No	2880659	168	66525	Senn et al., 2016	PRJEB34139
La050	228	t041	2008-12-15	Switzerland	Lausanne	University hospital of Lausanne	Yes	2879204	136	88013	Senn et al., 2016	PRJEB34139
La051	228	t041	2009-01-03	Switzerland	Lausanne	University hospital of Lausanne	Yes	2880867	142	88517	Senn et al., 2016	PRJEB34139
La052	228	t041	2009-01-14	Switzerland	Lausanne	University hospital of Lausanne	Yes	2881784	124	99333	Senn et al., 2016	PRJEB34139
La053	228	t041	2009-01-26	Switzerland	Lausanne	University hospital of Lausanne	No	2878672	139	88509	Senn et al., 2016	PRJEB34139
La054	228	t041	2009-02-03	Switzerland	Lausanne	University hospital of Lausanne	Yes	2919283	154	88013	Senn et al., 2016	PRJEB34139
La055	228	t041	2009-02-10	Switzerland	Lausanne	University hospital of Lausanne	No	2879875	125	94438	Senn et al., 2016	PRJEB34139
La057	228	t041	2009-02-23	Switzerland	Lausanne	University hospital of Lausanne	No	2880669	129	94342	Senn et al., 2016	PRJEB34139
La058	228	t041	2009-02-28	Switzerland	Lausanne	University hospital of Lausanne	No	2881178	144	94313	Senn et al., 2016	PRJEB34139
La059	228	t041	2009-03-08	Switzerland	Lausanne	University hospital of Lausanne	No	2878935	162	76992	Senn et al., 2016	PRJEB34139
La060	228	t041	2009-03-12	Switzerland	Lausanne	University hospital of Lausanne	Yes	2882432	125	94330	Senn et al., 2016	PRJEB34139
La061	228	t041	2009-03-17	Switzerland	Lausanne	University hospital of Lausanne	No	2881088	130	94326	Senn et al., 2016	PRJEB34139
La062	228	t041	2009-03-23	Switzerland	Lausanne	University hospital of Lausanne	No	2879091	133	99313	Senn et al., 2016	PRJEB34139
La063	228	t041	2009-03-29	Switzerland	Lausanne	University hospital of Lausanne	No	2879110	138	94421	Senn et al., 2016	PRJEB34139
La065	228	t041	2009-04-13	Switzerland	Lausanne	University hospital of Lausanne	No	2932812	222	88017	Senn et al., 2016	PRJEB34139
La066	228	t041	2009-04-29	Switzerland	Lausanne	University hospital of Lausanne	No	2880173	126	99321	Senn et al., 2016	PRJEB34139
La067	228	t041	2009-05-14	Switzerland	Lausanne	University hospital of Lausanne	No	2880208	135	94330	Senn et al., 2016	PRJEB34139
La068	228	t041	2009-05-22	Switzerland	Lausanne	University hospital of Lausanne	No	2879806	117	88537	Senn et al., 2016	PRJEB34139
La069	228	t041	2009-05-27	Switzerland	Lausanne	University hospital of Lausanne	No	2877260	130	99321	Senn et al., 2016	PRJEB34139
La070	228	t041	2009-06-04	Switzerland	Lausanne	University hospital of Lausanne	No	2878472	118	94474	Senn et al., 2016	PRJEB34139
La071	228	t041	2009-06-10	Switzerland	Lausanne	University hospital of Lausanne	Yes	2918914	147	83122	Senn et al., 2016	PRJEB34139
La072	228	t041	2009-06-15	Switzerland	Lausanne	University hospital of Lausanne	No	2879198	119	94330	Senn et al., 2016	PRJEB34139
La073	228	t041	2009-06-27	Switzerland	Lausanne	University hospital of Lausanne	No	2879358	125	99325	Senn et al., 2016	PRJEB34139
La074	228	t041	2009-06-30	Switzerland	Lausanne	University hospital of Lausanne	No	2917425	136	88654	Senn et al., 2016	PRJEB34139
La075	228	t041	2009-07-03	Switzerland	Lausanne	University hospital of Lausanne	No	2879080	137	93865	Senn et al., 2016	PRJEB34139
La076	228	t041	2009-07-08	Switzerland	Lausanne	University hospital of Lausanne	No	2863738	127	94338	Senn et al., 2016	PRJEB34139
La077	228	t041	2009-07-17	Switzerland	Lausanne	University hospital of Lausanne	No	2877965	123	99321	Senn et al., 2016	PRJEB34139
La078	228	t041	2009-07-24	Switzerland	Lausanne	University hospital of Lausanne	No	2916996	132	89069	Senn et al., 2016	PRJEB34139
La079	228	t041	2009-07-28	Switzerland	Lausanne	University hospital of Lausanne	No	2916192	146	88513	Senn et al., 2016	PRJEB34139
La080	228	t041	2009-08-05	Switzerland	Lausanne	University hospital of Lausanne	Yes	2939216	153	88529	Senn et al., 2016	PRJEB34139
La081	228	t041	2009-08-10	Switzerland	Lausanne	University hospital of Lausanne	No	2881398	133	88525	Senn et al., 2016	PRJEB34139
La082	228	t041	2009-08-17	Switzerland	Lausanne	University hospital of Lausanne	No	2916315	142	93784	Senn et al., 2016	PRJEB34139
La083	228	t041	2009-08-25	Switzerland	Lausanne	University hospital of Lausanne	No	2917143	143	99321	Senn et al., 2016	PRJEB34139
La084	228	t041	2009-09-06	Switzerland	Lausanne	University hospital of Lausanne	No	2917696	138	88521	Senn et al., 2016	PRJEB34139
La085	228	t041	2009-09-17	Switzerland	Lausanne	University hospital of Lausanne	No	2880474	130	88521	Senn et al., 2016	PRJEB34139
La086	228	t041	2009-09-30	Switzerland	Lausanne	University hospital of Lausanne	No	2913892	134	99321	Senn et al., 2016	PRJEB34139
La087	228	t041	2009-10-05	Switzerland	Lausanne	University hospital of Lausanne	Yes	2877436	131	94326	Senn et al., 2016	PRJEB34139
La088	228	t041	2009-10-12	Switzerland	Lausanne	University hospital of Lausanne	Yes	2879902	124	94469	Senn et al., 2016	PRJEB34139
La089	228	t041	2009-10-20	Switzerland	Lausanne	University hospital of Lausanne	No	2878970	137	88001	Senn et al., 2016	PRJEB34139
La090	228	t041	2009-10-27	Switzerland	Lausanne	University hospital of Lausanne	Yes	2859998	109	76827	Senn et al., 2016	PRJEB34139
La091	228	t041	2009-10-28	Switzerland	Lausanne	University hospital of Lausanne	No	2876484	121	82993	Senn et al., 2016	PRJEB34139
La092	Not assigned	t041	2009-11-02	Switzerland	Lausanne	University hospital of Lausanne	No	2880999	126	94338	Senn et al., 2016	PRJEB34139
La093	228	t041	2009-11-04	Switzerland	Lausanne	University hospital of Lausanne	No	2922747	140	94301	Senn et al., 2016	PRJEB34139
La094	228	t041	2009-11-06	Switzerland	Lausanne	University hospital of Lausanne	No	2878980	119	99325	Senn et al., 2016	PRJEB34139
La095	228	t041	2009-11-16	Switzerland	Lausanne	University hospital of Lausanne	No	2885496	122	88525	Senn et al., 2016	PRJEB34139
La096	228	t041	2009-11-23	Switzerland	Lausanne	University hospital of Lausanne	Yes	2876719	118	94337	Senn et al., 2016	PRJEB34139
La097	228	t041	2009-11-25	Switzerland	Lausanne	University hospital of Lausanne	Yes	2877743	109	99341	Senn et al., 2016	PRJEB34139
La098	228	t041	2009-11-30	Switzerland	Lausanne	University hospital of Lausanne	No	2878464	119	99333	Senn et al., 2016	PRJEB34139
La099	228	t041	2009-12-01	Switzerland	Lausanne	University hospital of Lausanne	No	2921915	139	88517	Senn et al., 2016	PRJEB34139
La100	228	t041	2009-12-11	Switzerland	Lausanne	University hospital of Lausanne	No	2918223	134	88337	Senn et al., 2016	PRJEB34139
La101	228	t041	2009-12-18	Switzerland	Lausanne	University hospital of Lausanne	No	2877843	120	99333	Senn et al., 2016	PRJEB34139
La102	228	t041	2009-12-24	Switzerland	Lausanne	University hospital of Lausanne	No	2876909	118	94420	Senn et al., 2016	PRJEB34139
La103	228	t041	2010-01-05	Switzerland	Lausanne	University hospital of Lausanne	No	2879063	125	99337	Senn et al., 2016	PRJEB34139
La104	228	t041	2010-01-11	Switzerland	Lausanne	University hospital of Lausanne	No	2876829	113	99345	Senn et al., 2016	PRJEB34139
La105	228	t041	2010-01-15	Switzerland	Lausanne	University hospital of Lausanne	Yes	2881443	115	94349	Senn et al., 2016	PRJEB34139
La106	228	t041	2010-01-19	Switzerland	Lausanne	University hospital of Lausanne	No	2879870	120	94342	Senn et al., 2016	PRJEB34139
La107	228	t041	2010-01-31	Switzerland	Lausanne	University hospital of Lausanne	No	2877767	119	94342	Senn et al., 2016	PRJEB34139
La109	228	t041	2010-02-08	Switzerland	Lausanne	University hospital of Lausanne	No	2877921	111	94331	Senn et al., 2016	PRJEB34139
La110	228	t041	2010-02-22	Switzerland	Lausanne	University hospital of Lausanne	No	2923334	129	99337	Senn et al., 2016	PRJEB34139
La111	228	Not assigned	2010-03-03	Switzerland	Lausanne	University hospital of Lausanne	No	2881110	124	99370	Senn et al., 2016	PRJEB34139
La112	228	t041	2010-03-08	Switzerland	Lausanne	University hospital of Lausanne	No	2877959	115	99333	Senn et al., 2016	PRJEB34139
La113	228	t041	2010-03-11	Switzerland	Lausanne	University hospital of Lausanne	No	2877358	110	99345	Senn et al., 2016	PRJEB34139
La114	228	t041	2010-03-16	Switzerland	Lausanne	University hospital of Lausanne	No	2916093	140	94326	Senn et al., 2016	PRJEB34139
La115	228	t041	2010-03-22	Switzerland	Lausanne	University hospital of Lausanne	No	2877599	112	94337	Senn et al., 2016	PRJEB34139
La116	228	t041	2010-03-24	Switzerland	Lausanne	University hospital of Lausanne	No	2879533	128	99333	Senn et al., 2016	PRJEB34139
La117	228	t041	2010-03-31	Switzerland	Lausanne	University hospital of Lausanne	No	2880415	119	99333	Senn et al., 2016	PRJEB34139
La118	228	t041	2010-04-06	Switzerland	Lausanne	University hospital of Lausanne	No	2876923	125	88525	Senn et al., 2016	PRJEB34139
La119	228	t041	2010-04-11	Switzerland	Lausanne	University hospital of Lausanne	No	2881641	122	99337	Senn et al., 2016	PRJEB34139
La120	228	t041	2010-04-12	Switzerland	Lausanne	University hospital of Lausanne	No	2880696	127	99325	Senn et al., 2016	PRJEB34139
La121	228	t001	2010-04-18	Switzerland	Lausanne	University hospital of Lausanne	Yes	2874215	99	99394	Senn et al., 2016	PRJEB34139
La122	228	t041	2010-04-20	Switzerland	Lausanne	University hospital of Lausanne	No	2876673	110	99337	Senn et al., 2016	PRJEB34139
La123	228	t041	2010-04-27	Switzerland	Lausanne	University hospital of Lausanne	No	2880131	109	99337	Senn et al., 2016	PRJEB34139
La124	228	t041	2010-05-04	Switzerland	Lausanne	University hospital of Lausanne	No	2880066	114	94346	Senn et al., 2016	PRJEB34139
La125	228	t041	2010-05-07	Switzerland	Lausanne	University hospital of Lausanne	No	2881925	123	92865	Senn et al., 2016	PRJEB34139
La126	228	t041	2010-05-12	Switzerland	Lausanne	University hospital of Lausanne	No	2878344	114	99341	Senn et al., 2016	PRJEB34139
La127	228	t041	2010-05-18	Switzerland	Lausanne	University hospital of Lausanne	No	2878907	125	88533	Senn et al., 2016	PRJEB34139
La128	228	t041	2010-05-25	Switzerland	Lausanne	University hospital of Lausanne	No	2880614	118	94337	Senn et al., 2016	PRJEB34139
La129	228	t041	2010-06-07	Switzerland	Lausanne	University hospital of Lausanne	No	2882474	123	99337	Senn et al., 2016	PRJEB34139
La130	228	t041	2010-06-10	Switzerland	Lausanne	University hospital of Lausanne	Yes	2882068	123	94354	Senn et al., 2016	PRJEB34139
La131	228	t041	2010-06-29	Switzerland	Lausanne	University hospital of Lausanne	No	2878510	117	99337	Senn et al., 2016	PRJEB34139
La132	228	t041	2010-07-07	Switzerland	Lausanne	University hospital of Lausanne	No	2879737	121	94342	Senn et al., 2016	PRJEB34139
La134	228	t041	2010-07-13	Switzerland	Lausanne	University hospital of Lausanne	No	2878850	121	94350	Senn et al., 2016	PRJEB34139
La135	228	t041	2010-07-16	Switzerland	Lausanne	University hospital of Lausanne	No	2879074	112	99341	Senn et al., 2016	PRJEB34139
La136	228	t041	2010-07-19	Switzerland	Lausanne	University hospital of Lausanne	No	2881232	124	99333	Senn et al., 2016	PRJEB34139
La137	228	t041	2010-07-24	Switzerland	Lausanne	University hospital of Lausanne	No	2879642	120	99345	Senn et al., 2016	PRJEB34139
La138	228	t041	2010-07-26	Switzerland	Lausanne	University hospital of Lausanne	No	2880747	118	94346	Senn et al., 2016	PRJEB34139
La139	228	t041	2010-08-02	Switzerland	Lausanne	University hospital of Lausanne	No	2880720	117	99341	Senn et al., 2016	PRJEB34139
La140	228	t041	2010-08-09	Switzerland	Lausanne	University hospital of Lausanne	Yes	2880159	130	93872	Senn et al., 2016	PRJEB34139
La141	228	t041	2010-08-13	Switzerland	Lausanne	University hospital of Lausanne	No	2877774	115	99341	Senn et al., 2016	PRJEB34139
La142	228	t041	2010-08-19	Switzerland	Lausanne	University hospital of Lausanne	No	2881828	126	94342	Senn et al., 2016	PRJEB34139
La143	228	t041	2010-08-23	Switzerland	Lausanne	University hospital of Lausanne	Yes	2883829	122	99345	Senn et al., 2016	PRJEB34139
La144	228	t041	2010-08-30	Switzerland	Lausanne	University hospital of Lausanne	No	2880205	135	99390	Senn et al., 2016	PRJEB34139
La145	228	t041	2010-09-06	Switzerland	Lausanne	University hospital of Lausanne	Yes	2877525	111	94349	Senn et al., 2016	PRJEB34139
La146	228	t041	2010-09-10	Switzerland	Lausanne	University hospital of Lausanne	No	2877814	123	99337	Senn et al., 2016	PRJEB34139
La147	228	t041	2010-09-14	Switzerland	Lausanne	University hospital of Lausanne	No	2880420	120	99337	Senn et al., 2016	PRJEB34139
La148	228	t041	2010-09-24	Switzerland	Lausanne	University hospital of Lausanne	No	2880694	123	106156	Senn et al., 2016	PRJEB34139
La150	228	Not assigned	2010-10-06	Switzerland	Lausanne	University hospital of Lausanne	No	2880299	121	99337	Senn et al., 2016	PRJEB34139
La151	228	t041	2010-10-13	Switzerland	Lausanne	University hospital of Lausanne	Yes	2881610	117	99337	Senn et al., 2016	PRJEB34139
La152	228	t041	2010-10-25	Switzerland	Lausanne	University hospital of Lausanne	No	2882722	132	94331	Senn et al., 2016	PRJEB34139
La153	228	t041	2010-10-29	Switzerland	Lausanne	University hospital of Lausanne	No	2878036	110	94350	Senn et al., 2016	PRJEB34139
La154	228	t041	2010-11-05	Switzerland	Lausanne	University hospital of Lausanne	Yes	2881069	126	88530	Senn et al., 2016	PRJEB34139
La155	228	t041	2010-11-15	Switzerland	Lausanne	University hospital of Lausanne	No	2880249	130	88525	Senn et al., 2016	PRJEB34139
La156	228	t041	2010-11-22	Switzerland	Lausanne	University hospital of Lausanne	Yes	2916962	134	94326	Senn et al., 2016	PRJEB34139
La157	228	t041	2010-11-29	Switzerland	Lausanne	University hospital of Lausanne	No	2914589	132	99321	Senn et al., 2016	PRJEB34139
La158	228	t041	2010-12-13	Switzerland	Lausanne	University hospital of Lausanne	Yes	2879063	117	99602	Senn et al., 2016	PRJEB34139
La159	228	t041	2011-01-02	Switzerland	Lausanne	University hospital of Lausanne	Yes	2916534	141	88017	Senn et al., 2016	PRJEB34139
La160	228	t041	2011-01-10	Switzerland	Lausanne	University hospital of Lausanne	No	2879166	123	99345	Senn et al., 2016	PRJEB34139
La161	228	t041	2011-01-20	Switzerland	Lausanne	University hospital of Lausanne	Yes	2880770	120	92861	Senn et al., 2016	PRJEB34139
La162	228	t041	2011-02-10	Switzerland	Lausanne	University hospital of Lausanne	Yes	2880287	129	94342	Senn et al., 2016	PRJEB34139
La163	228	t041	2011-02-21	Switzerland	Lausanne	University hospital of Lausanne	No	2882463	123	99345	Senn et al., 2016	PRJEB34139
La164	228	t041	2011-03-07	Switzerland	Lausanne	University hospital of Lausanne	Yes	2878228	120	94342	Senn et al., 2016	PRJEB34139
La165	228	t041	2011-03-22	Switzerland	Lausanne	University hospital of Lausanne	No	2879692	119	94350	Senn et al., 2016	PRJEB34139
La166	228	t041	2011-04-04	Switzerland	Lausanne	University hospital of Lausanne	No	2877509	125	99436	Senn et al., 2016	PRJEB34139
La167	228	t041	2011-04-19	Switzerland	Lausanne	University hospital of Lausanne	No	2881887	130	94337	Senn et al., 2016	PRJEB34139
La168	228	t041	2011-05-09	Switzerland	Lausanne	University hospital of Lausanne	No	2877012	121	88017	Senn et al., 2016	PRJEB34139
La169	228	t041	2011-05-31	Switzerland	Lausanne	University hospital of Lausanne	Yes	2881929	133	99337	Senn et al., 2016	PRJEB34139
La170	228	t041	2011-06-07	Switzerland	Lausanne	University hospital of Lausanne	No	2919098	126	99349	Senn et al., 2016	PRJEB34139
La171	228	t041	2011-06-27	Switzerland	Lausanne	University hospital of Lausanne	No	2883057	118	99367	Senn et al., 2016	PRJEB34139
La172	228	t041	2011-07-05	Switzerland	Lausanne	University hospital of Lausanne	No	2880175	129	99377	Senn et al., 2016	PRJEB34139
La173	228	t041	2011-07-18	Switzerland	Lausanne	University hospital of Lausanne	No	2881816	122	99333	Senn et al., 2016	PRJEB34139
La174	228	t041	2011-08-02	Switzerland	Lausanne	University hospital of Lausanne	Yes	2880708	116	88541	Senn et al., 2016	PRJEB34139
La175	228	t041	2011-08-15	Switzerland	Lausanne	University hospital of Lausanne	No	2882456	125	94330	Senn et al., 2016	PRJEB34139
La176	228	t041	2011-08-18	Switzerland	Lausanne	University hospital of Lausanne	No	2879720	120	88529	Senn et al., 2016	PRJEB34139
La177	228	t041	2011-08-28	Switzerland	Lausanne	University hospital of Lausanne	No	2880815	119	94346	Senn et al., 2016	PRJEB34139
La178	228	t041	2011-09-07	Switzerland	Lausanne	University hospital of Lausanne	No	2919877	146	94342	Senn et al., 2016	PRJEB34139
La179	228	t041	2011-09-22	Switzerland	Lausanne	University hospital of Lausanne	No	2878371	119	88529	Senn et al., 2016	PRJEB34139
La180	228	t041	2011-10-10	Switzerland	Lausanne	University hospital of Lausanne	No	2905138	137	88021	Senn et al., 2016	PRJEB34139
La181	228	t041	2011-10-31	Switzerland	Lausanne	University hospital of Lausanne	No	2879484	129	88533	Senn et al., 2016	PRJEB34139
La182	228	New	2011-11-09	Switzerland	Lausanne	University hospital of Lausanne	No	2836599	110	94326	Senn et al., 2016	PRJEB34139
La183	228	t041	2011-11-20	Switzerland	Lausanne	University hospital of Lausanne	No	2880419	124	89770	Senn et al., 2016	PRJEB34139
La184	228	t041	2011-12-12	Switzerland	Lausanne	University hospital of Lausanne	No	2840853	106	88526	Senn et al., 2016	PRJEB34139
La185	228	t041	2012-01-09	Switzerland	Lausanne	University hospital of Lausanne	Yes	2917686	130	94354	Senn et al., 2016	PRJEB34139
La186	228	t041	2012-01-23	Switzerland	Lausanne	University hospital of Lausanne	Yes	2880431	128	88529	Senn et al., 2016	PRJEB34139
La187	228	t041	2012-02-20	Switzerland	Lausanne	University hospital of Lausanne	Yes	2919215	144	94338	Senn et al., 2016	PRJEB34139
La188	228	t041	2012-03-05	Switzerland	Lausanne	University hospital of Lausanne	No	2915569	139	94318	Senn et al., 2016	PRJEB34139
La189	228	t041	2012-04-06	Switzerland	Lausanne	University hospital of Lausanne	No	2881725	129	82997	Senn et al., 2016	PRJEB34139
La190	228	t041	2012-05-08	Switzerland	Lausanne	University hospital of Lausanne	Yes	2854626	134	99329	Senn et al., 2016	PRJEB34139
La191	228	t041	2012-05-23	Switzerland	Lausanne	University hospital of Lausanne	No	2882292	125	94342	Senn et al., 2016	PRJEB34139
La192	228	t001	2012-06-04	Switzerland	Lausanne	University hospital of Lausanne	No	2904789	121	88433	Senn et al., 2016	PRJEB34139
La193	228	t041	2012-06-08	Switzerland	Lausanne	University hospital of Lausanne	No	2919260	129	83050	Senn et al., 2016	PRJEB34139
La194	228	t041	2012-06-23	Switzerland	Lausanne	University hospital of Lausanne	No	2881090	129	88497	Senn et al., 2016	PRJEB34139
La195	228	t041	2012-06-28	Switzerland	Lausanne	University hospital of Lausanne	No	2882566	123	94423	Senn et al., 2016	PRJEB34139
La196	228	t041	2012-07-09	Switzerland	Lausanne	University hospital of Lausanne	No	2882590	133	94338	Senn et al., 2016	PRJEB34139
La197	228	t041	2012-07-30	Switzerland	Lausanne	University hospital of Lausanne	No	2893308	129	88525	Senn et al., 2016	PRJEB34139
La198	228	t041	2012-08-06	Switzerland	Lausanne	University hospital of Lausanne	No	2883044	137	83774	Senn et al., 2016	PRJEB34139
La199	228	t041	2012-08-13	Switzerland	Lausanne	University hospital of Lausanne	Yes	2918099	132	94318	Senn et al., 2016	PRJEB34139
La200	228	t001	2012-09-03	Switzerland	Lausanne	University hospital of Lausanne	No	2866323	97	99290	Senn et al., 2016	PRJEB34139
La201	228	t041	2012-09-10	Switzerland	Lausanne	University hospital of Lausanne	No	2880334	132	86891	Senn et al., 2016	PRJEB34139
La203	228	t041	2012-09-26	Switzerland	Lausanne	University hospital of Lausanne	No	2882241	127	94333	Senn et al., 2016	PRJEB34139
La204	228	t041	2012-10-08	Switzerland	Lausanne	University hospital of Lausanne	No	2882786	125	94342	Senn et al., 2016	PRJEB34139
La205	228	t041	2012-10-22	Switzerland	Lausanne	University hospital of Lausanne	No	2918608	131	94342	Senn et al., 2016	PRJEB34139
La206	228	t041	2012-11-12	Switzerland	Lausanne	University hospital of Lausanne	No	2921061	142	88529	Senn et al., 2016	PRJEB34139
La207	228	t041	2012-12-23	Switzerland	Lausanne	University hospital of Lausanne	Yes	2879253	131	94310	Senn et al., 2016	PRJEB34139
La208	228	t041	2008-01-10	Switzerland	Lausanne	University hospital of Lausanne	Yes	2836370	116	76379	Senn et al., 2016	PRJEB34139
La209	228	t041	2008-01-10	Switzerland	Lausanne	University hospital of Lausanne	Yes	2880364	121	99333	Senn et al., 2016	PRJEB34139
La210	228	t041	2008-01-24	Switzerland	Lausanne	University hospital of Lausanne	No	2854701	132	88514	Senn et al., 2016	PRJEB34139
La211	228	t1003	2007-11-27	Switzerland	Lausanne	University hospital of Lausanne	Yes	2886052	123	99337	Senn et al., 2016	PRJEB34139
La212	228	t041	2008-02-28	Switzerland	Lausanne	University hospital of Lausanne	No	2885722	123	110110	Senn et al., 2016	PRJEB34139
La213	228	t041	2008-03-02	Switzerland	Lausanne	University hospital of Lausanne	No	2918670	197	94734	Senn et al., 2016	PRJEB34139
La214	228	t041	2008-03-02	Switzerland	Lausanne	University hospital of Lausanne	No	2885587	120	99333	Senn et al., 2016	PRJEB34139
La215	228	t041	2008-03-10	Switzerland	Lausanne	University hospital of Lausanne	No	2923668	139	93704	Senn et al., 2016	PRJEB34139
La216	228	t041	2008-03-13	Switzerland	Lausanne	University hospital of Lausanne	Yes	2816461	119	82590	Senn et al., 2016	PRJEB34139
La217	228	t041	2008-03-14	Switzerland	Lausanne	University hospital of Lausanne	No	2881391	130	88529	Senn et al., 2016	PRJEB34139
La218	228	t041	2008-03-18	Switzerland	Lausanne	University hospital of Lausanne	No	2881177	122	94349	Senn et al., 2016	PRJEB34139
La219	228	t971	2008-04-03	Switzerland	Lausanne	University hospital of Lausanne	No	2888002	123	96748	Senn et al., 2016	PRJEB34139
La220	228	New	2008-05-24	Switzerland	Lausanne	University hospital of Lausanne	No	2889116	131	84800	Senn et al., 2016	PRJEB34139
La221	228	t041	2008-06-02	Switzerland	Lausanne	University hospital of Lausanne	Yes	2886262	126	107219	Senn et al., 2016	PRJEB34139
La222	228	Not assigned	2008-06-15	Switzerland	Lausanne	University hospital of Lausanne	No	2886271	120	99329	Senn et al., 2016	PRJEB34139
La223	228	t041	2008-06-30	Switzerland	Lausanne	University hospital of Lausanne	No	2877726	126	94318	Senn et al., 2016	PRJEB34139
La225	228	t041	2008-09-08	Switzerland	Lausanne	University hospital of Lausanne	No	2885885	141	94341	Senn et al., 2016	PRJEB34139
La227	228	Not assigned	2008-09-09	Switzerland	Lausanne	University hospital of Lausanne	Yes	2882508	124	99337	Senn et al., 2016	PRJEB34139
La228	228	t041	2008-09-09	Switzerland	Lausanne	University hospital of Lausanne	No	2881618	120	99325	Senn et al., 2016	PRJEB34139
La229	228	t041	2008-09-11	Switzerland	Lausanne	University hospital of Lausanne	No	2880952	125	88517	Senn et al., 2016	PRJEB34139
La231	228	t041	2008-09-17	Switzerland	Lausanne	University hospital of Lausanne	No	2871571	131	99325	Senn et al., 2016	PRJEB34139
La232	228	t041	2008-09-19	Switzerland	Lausanne	University hospital of Lausanne	Yes	2884484	130	96645	Senn et al., 2016	PRJEB34139
La233	111	t041	2008-09-21	Switzerland	Lausanne	University hospital of Lausanne	No	2848023	100	74810	Senn et al., 2016	PRJEB34139
La234	228	t041	2008-09-23	Switzerland	Lausanne	University hospital of Lausanne	No	2878692	136	94326	Senn et al., 2016	PRJEB34139
La235	228	t041	2008-09-23	Switzerland	Lausanne	University hospital of Lausanne	No	2880298	120	99345	Senn et al., 2016	PRJEB34139
La236	228	t041	2008-09-23	Switzerland	Lausanne	University hospital of Lausanne	No	2882214	122	94342	Senn et al., 2016	PRJEB34139
La237	228	t041	2008-09-24	Switzerland	Lausanne	University hospital of Lausanne	No	2882934	119	99345	Senn et al., 2016	PRJEB34139
La238	228	t041	2008-10-03	Switzerland	Lausanne	University hospital of Lausanne	No	2884089	122	110119	Senn et al., 2016	PRJEB34139
La239	228	t041	2008-10-05	Switzerland	Lausanne	University hospital of Lausanne	Yes	2882581	124	94350	Senn et al., 2016	PRJEB34139
La240	228	t041	2008-10-09	Switzerland	Lausanne	University hospital of Lausanne	No	2880615	125	94342	Senn et al., 2016	PRJEB34139
La241	228	t041	2008-10-27	Switzerland	Lausanne	University hospital of Lausanne	No	2880599	129	88021	Senn et al., 2016	PRJEB34139
La242	228	t041	2008-10-28	Switzerland	Lausanne	University hospital of Lausanne	No	2882199	121	99444	Senn et al., 2016	PRJEB34139
La243	228	t041	2008-10-29	Switzerland	Lausanne	University hospital of Lausanne	Yes	2882231	129	88529	Senn et al., 2016	PRJEB34139
La244	228	t041	2008-11-03	Switzerland	Lausanne	University hospital of Lausanne	No	2878192	129	99321	Senn et al., 2016	PRJEB34139
La246	228	t041	2008-11-04	Switzerland	Lausanne	University hospital of Lausanne	No	2879732	127	88009	Senn et al., 2016	PRJEB34139
La248	228	t041	2008-11-04	Switzerland	Lausanne	University hospital of Lausanne	No	2880825	128	99337	Senn et al., 2016	PRJEB34139
La249	228	t041	2008-11-05	Switzerland	Lausanne	University hospital of Lausanne	Yes	2881131	132	76928	Senn et al., 2016	PRJEB34139
La250	228	t041	2008-11-10	Switzerland	Lausanne	University hospital of Lausanne	No	2879013	124	94326	Senn et al., 2016	PRJEB34139
La251	228	t041	2008-11-10	Switzerland	Lausanne	University hospital of Lausanne	No	2868894	133	73377	Senn et al., 2016	PRJEB34139
La252	228	t041	2008-11-10	Switzerland	Lausanne	University hospital of Lausanne	No	2880919	123	94338	Senn et al., 2016	PRJEB34139
La253	228	t041	2008-11-15	Switzerland	Lausanne	University hospital of Lausanne	No	2879423	132	88513	Senn et al., 2016	PRJEB34139
La254	228	t041	2008-11-18	Switzerland	Lausanne	University hospital of Lausanne	No	2878613	135	99374	Senn et al., 2016	PRJEB34139
La255	228	t041	2008-11-19	Switzerland	Lausanne	University hospital of Lausanne	Yes	2880564	121	99333	Senn et al., 2016	PRJEB34139
La256	228	t041	2008-11-19	Switzerland	Lausanne	University hospital of Lausanne	No	2879936	133	99410	Senn et al., 2016	PRJEB34139
La257	228	t041	2008-11-24	Switzerland	Lausanne	University hospital of Lausanne	No	2880215	130	88525	Senn et al., 2016	PRJEB34139
La258	228	t041	2008-12-09	Switzerland	Lausanne	University hospital of Lausanne	No	2879383	145	88505	Senn et al., 2016	PRJEB34139
La259	228	t041	2008-12-01	Switzerland	Lausanne	University hospital of Lausanne	Yes	2881818	130	88509	Senn et al., 2016	PRJEB34139
La260	228	t041	2008-12-01	Switzerland	Lausanne	University hospital of Lausanne	No	2878985	138	99305	Senn et al., 2016	PRJEB34139
La261	228	t041	2008-12-02	Switzerland	Lausanne	University hospital of Lausanne	No	2881622	130	94337	Senn et al., 2016	PRJEB34139
La262	228	t041	2008-12-03	Switzerland	Lausanne	University hospital of Lausanne	No	2879912	124	88525	Senn et al., 2016	PRJEB34139
La264	228	t041	2008-12-05	Switzerland	Lausanne	University hospital of Lausanne	Yes	2881134	127	94342	Senn et al., 2016	PRJEB34139
La265	228	Not assigned	2008-12-05	Switzerland	Lausanne	University hospital of Lausanne	No	2880871	135	94458	Senn et al., 2016	PRJEB34139
La266	228	t041	2008-12-08	Switzerland	Lausanne	University hospital of Lausanne	No	2878130	137	88513	Senn et al., 2016	PRJEB34139
La267	228	t041	2008-12-12	Switzerland	Lausanne	University hospital of Lausanne	No	2880163	123	99333	Senn et al., 2016	PRJEB34139
La268	228	t041	2008-12-12	Switzerland	Lausanne	University hospital of Lausanne	Yes	2877106	133	88517	Senn et al., 2016	PRJEB34139
La269	228	t041	2008-12-10	Switzerland	Lausanne	University hospital of Lausanne	No	2866018	101	94272	Senn et al., 2016	PRJEB34139
La270	228	t041	2008-12-12	Switzerland	Lausanne	University hospital of Lausanne	No	2879509	134	94301	Senn et al., 2016	PRJEB34139
La271	228	t041	2008-12-15	Switzerland	Lausanne	University hospital of Lausanne	No	2881190	126	99337	Senn et al., 2016	PRJEB34139
La272	228	t041	2008-12-15	Switzerland	Lausanne	University hospital of Lausanne	No	2879429	132	88521	Senn et al., 2016	PRJEB34139
La273	228	t041	2008-12-16	Switzerland	Lausanne	University hospital of Lausanne	No	2878290	126	99325	Senn et al., 2016	PRJEB34139
La274	228	t041	2008-12-21	Switzerland	Lausanne	University hospital of Lausanne	Yes	2878980	120	99337	Senn et al., 2016	PRJEB34139
La275	228	t041	2008-12-18	Switzerland	Lausanne	University hospital of Lausanne	No	2880692	129	94342	Senn et al., 2016	PRJEB34139
La276	228	t041	2008-12-19	Switzerland	Lausanne	University hospital of Lausanne	No	2878113	137	99321	Senn et al., 2016	PRJEB34139
La277	228	t041	2008-12-22	Switzerland	Lausanne	University hospital of Lausanne	Yes	2839206	111	94338	Senn et al., 2016	PRJEB34139
La278	228	t041	2008-12-29	Switzerland	Lausanne	University hospital of Lausanne	No	2878822	121	99333	Senn et al., 2016	PRJEB34139
La279	228	t041	2008-12-29	Switzerland	Lausanne	University hospital of Lausanne	No	2878348	123	94338	Senn et al., 2016	PRJEB34139
La280	228	t041	2009-01-08	Switzerland	Lausanne	University hospital of Lausanne	Yes	2879343	136	94346	Senn et al., 2016	PRJEB34139
PL510	111	t041	2006-09-04	Poland		EU-SLR 2006 study	Yes	2848371	94	99332	This Study	PRJEB34863
PL511	111	t041	2006-09-01	Poland		EU-SLR 2006 study	Yes	2846371	91	99344	This Study	PRJEB34863
PL512	228	t041	2006-09-01	Poland		EU-SLR 2006 study	No	2894750	101	94398	This Study	PRJEB34863
PL562	228	t041	2011-03-25	Poland	Warsaw	EU-SLR 2011 study	Yes	2827471	88	98306	This Study	PRJEB34863
SE501	111	t041	2006-09-22	Sweden		EU-SLR 2006 study	Yes	2858169	91	99408	This Study	PRJEB34863
SE502	111	t041	2006-09-25	Sweden		EU-SLR 2006 study	Yes	2855295	87	98141	This Study	PRJEB34863
SE503	111	t041	2006-10-03	Sweden		EU-SLR 2006 study	Yes	2848939	84	108396	This Study	PRJEB34863
SE504	111	t041	2006-10-03	Sweden		EU-SLR 2006 study	Yes	2849408	82	108396	This Study	PRJEB34863
SE505	111	t041	2006-10-07	Sweden		EU-SLR 2006 study	Yes	2855952	83	99345	This Study	PRJEB34863
SE506	111	t041	2006-12-04	Sweden		EU-SLR 2006 study	Yes	2855889	84	98157	This Study	PRJEB34863
SE507	111	t041	2006-12-22	Sweden		EU-SLR 2006 study	Yes	2858013	92	92858	This Study	PRJEB34863
SE508	111	t041	2006-11-08	Sweden		EU-SLR 2006 study	Yes	2858887	91	94350	This Study	PRJEB34863
SE561	111	t041	2006-11-02	Sweden		EU-SLR 2006 study	Yes	2854601	86	99309	This Study	PRJEB34863
SI576	111	t041	2011-06-27	Slovenia	Ljubljana	EU-SLR 2011 study	Yes	2855165	84	94334	This Study	PRJEB34863
SI577	111	t041	2011-05-23	Slovenia	Ljubljana	EU-SLR 2011 study	Yes	2857398	90	94413	This Study	PRJEB34863
Vd457	228	t041	2010-05-31	Switzerland	Canton of Vaud	Prevalences in Long term care institutions near Lausanne	No	2920288	128	94360	This Study	PRJEB34863
Vd458	228	t041	2010-06-18	Switzerland	Canton of Vaud	Prevalences in Long term care institutions near Lausanne	No	2882859	117	92849	This Study	PRJEB34863
Vd459	228	t041	2010-06-28	Switzerland	Canton of Vaud	Prevalences in Long term care institutions near Lausanne	No	2916016	130	94330	This Study	PRJEB34863
Vd460	228	t041	2010-07-02	Switzerland	Canton of Vaud	Prevalences in Long term care institutions near Lausanne	Yes	2879902	109	99321	This Study	PRJEB34863
Vd461	228	t041	2010-07-02	Switzerland	Canton of Vaud	Prevalences in Long term care institutions near Lausanne	Yes	2887914	118	99332	This Study	PRJEB34863
Vd462	228	t041	2010-07-09	Switzerland	Canton of Vaud	Prevalences in Long term care institutions near Lausanne	Yes	2876673	115	99378	This Study	PRJEB34863
Vd463	228	Not assigned	2010-07-30	Switzerland	Canton of Vaud	Prevalences in Long term care institutions near Lausanne	Yes	2919639	125	99337	This Study	PRJEB34863
Vd464	228	t041	2010-08-10	Switzerland	Canton of Vaud	Prevalences in Long term care institutions near Lausanne	Yes	2878813	109	94326	This Study	PRJEB34863
Vd465	228	t041	2010-08-30	Switzerland	Canton of Vaud	Prevalences in Long term care institutions near Lausanne	No	2878611	108	99341	This Study	PRJEB34863
Vd466	111	t9393	2010-09-17	Switzerland	Canton of Vaud	Prevalences in Long term care institutions near Lausanne	Yes	2865434	86	99329	This Study	PRJEB34863
Vd467	228	t041	2010-09-27	Switzerland	Canton of Vaud	Prevalences in Long term care institutions near Lausanne	No	2881672	111	100570	This Study	PRJEB34863
Vd468	228	t041	2010-10-11	Switzerland	Canton of Vaud	Prevalences in Long term care institutions near Lausanne	No	2878279	110	99321	This Study	PRJEB34863
Vd469	228	t041	2010-11-01	Switzerland	Canton of Vaud	Prevalences in Long term care institutions near Lausanne	Yes	2882474	114	94319	This Study	PRJEB34863
Vd470	228	t041	2010-11-23	Switzerland	Canton of Vaud	Prevalences in Long term care institutions near Lausanne	Yes	2878274	105	88529	This Study	PRJEB34863
Vd471	228	Not assigned	2010-11-23	Switzerland	Canton of Vaud	Prevalences in Long term care institutions near Lausanne	Yes	2884362	119	94342	This Study	PRJEB34863
Vd472	228	t041	2011-05-30	Switzerland	Canton of Vaud	Prevalences in Long term care institutions near Lausanne	No	2879078	114	99400	This Study	PRJEB34863
Vd473	228	t041	2011-06-23	Switzerland	Canton of Vaud	Prevalences in Long term care institutions near Lausanne	Yes	2928159	136	108165	This Study	PRJEB34863
Vd474	228	t041	2011-06-28	Switzerland	Canton of Vaud	Prevalences in Long term care institutions near Lausanne	No	2897884	128	99321	This Study	PRJEB34863
Vd475	228	t041	2011-07-27	Switzerland	Canton of Vaud	Prevalences in Long term care institutions near Lausanne	No	2884588	119	94334	This Study	PRJEB34863
Vd476	228	t041	2011-08-16	Switzerland	Canton of Vaud	Prevalences in Long term care institutions near Lausanne	No	2878124	107	88001	This Study	PRJEB34863
Vd477	228	t041	2011-08-18	Switzerland	Canton of Vaud	Prevalences in Long term care institutions near Lausanne	No	2882155	110	99335	This Study	PRJEB34863
Vd478	228	t041	2011-09-15	Switzerland	Canton of Vaud	Prevalences in Long term care institutions near Lausanne	Yes	2912481	122	99321	This Study	PRJEB34863
Vd479	228	t041	2011-09-29	Switzerland	Canton of Vaud	Prevalences in Long term care institutions near Lausanne	No	2917444	131	88033	This Study	PRJEB34863
Vd480	228	t041	2011-11-07	Switzerland	Canton of Vaud	Prevalences in Long term care institutions near Lausanne	No	2879675	115	94315	This Study	PRJEB34863
Vd481	228	t041	2011-11-17	Switzerland	Canton of Vaud	Prevalences in Long term care institutions near Lausanne	Yes	2882634	118	99333	This Study	PRJEB34863
