# Supplementary material for: Phylogeographical Analysis Reveals the Historic Origin, Emergence, and Evolutionary Dynamics of Methicillin-Resistant Staphylococcus aureus ST228
Source: Front Microbiol. 2020 Aug 26;11:2063. doi: 10.3389/fmicb.2020.02063 (PMC7479193; doi:10.3389/fmicb.2020.02063)
Supplement: TABLE S2 — Gubbins results representing detected genes with a high number of SNPs. [file Table_2.XLSX]

## Sheet: Sheet1
Start Position	End Position	Number of SNPs	New locus tag*	Old locus tag*	Product*	Start and End Position in N315*	Comment*	Isolates ID
92162	92522	17	SA_RS00565	SA0082	dihydroneopterin aldolase	91521..92585		Ge415
92303	93286	5	SA_RS00565	SA0082	dihydroneopterin aldolase	91521..92585		Ge372,Ge373,Ge391,Ge415,Ge387,La043,Ge397,Ge410,Ge404,La213,Ge385,Ge380,Ge396,Ge402,Ge403
92409	92468	10	SA_RS00565	SA0082	dihydroneopterin aldolase	91521..92585		Ge368,Ge369,Ge367,Ge372,Ge373,Ge391,Ge415,Ge387,La043,Ge397,Ge410,Ge404,La213,Ge385,Ge380,Ge396,Ge402,Ge403,Ge392,Ge375,,Ge383,Ge390,Ge394,Ge384,Ge386,Ge389,La217,Ge378,Ge374,Ge370,Ge371,Ge395,Ge379,Ge406,Ge414,Ge408,Ge400,Ge411,Ge407,Ge399,Ge388,Ge382
92456	93254	9	SA_RS00570	SA0083	MBL fold metallo-hydrolase	92616..93950		Ge373,Ge391,Ge415,Ge387,La043,Ge397,Ge410,Ge404,La213
104362	105155	6	SA_RS00620	SA0092	tandem-type lipoprotein	103853..104623		La045
123270	123580	13	SA_RS00690	SA0107	immunoglobulin G-binding protein A	122649..124001		IT568,IT567,IT564
123300	123462	14	SA_RS00690	SA0107	immunoglobulin G-binding protein A	122649..124001		Ge414
123357	123491	11	SA_RS00690	SA0107	immunoglobulin G-binding protein A	122649..124001		IT574
123387	123540	10	SA_RS00690	SA0107	immunoglobulin G-binding protein A	122649..124001		Vd472
123489	123643	11	SA_RS00690	SA0107	immunoglobulin G-binding protein A	122649..124001		DE805
343535	343589	5	SA_RS01665	SA0286	TIGR01741 family protein	343185..343685		Vd462
345323	345354	7	SA_RS01685	SA0290	TIGR01741 family protein	345228..345713		BE604,BE603,BE611,BE609,BE601,BE607,BE608,BE610,BE602,BE605,BE606,PL512,PL562,IT559,IT709,IT551,IT571,IT570,IT568,IT567,IT564,IT550,IT555,ES536,IT705,La005,HU578,DE806,DE812,DE811,DE821,DE807,DE824,DE808,DE815,DE825,DE810,DE803,DE813,DE805,DE814,DE826,DE801,DE804,DE802,IT569,IT556,IT547,IT548,IT711,IT703,IT558,IT704,IT710,IT708,IT538,IT542,IT543,FI535,IT573,IT574,IT563,IT552,BG560,IT540,IT539,IT5…
345340	345354	5	SA_RS01685	SA0290	TIGR01741 family protein	345228..345713		HU578,DE806,DE812,DE811,DE821,DE807,DE824,DE808,DE815,DE825,DE810,DE803,DE813,DE805,DE814,DE826,DE801,DE804,DE802,IT569,IT556,IT547,IT548,IT711,IT703,IT558,IT704,IT710,IT708,IT538,IT542,IT543,FI535,IT573,IT574,IT563,IT552,BG560,IT540,IT539,IT537,IT557,IT549,IT712,IT572,IT565,IT554,IT553,IT566,IT707,DE827,AT518,AT514,AT516,AT515,AT520,AT513,AT517
586946	586963	5	SA_RS02935	SA0501	DNA-directed RNA polymerase subunit beta	583335..586931		IT705
607527	607647	5	SA_RS03025	SA0519	serine-aspartate repeat-containing protein C	605215..608076		Ge321,Ge334,Ge333
844170	844217	4	SA_RS14335		ssrA	843797..844158	tmRNA	DE804
850337	850430	9	SA_RS04225	SA0742	clumping factor A	848484..851453		Ge324,Ge335
850427	850448	5	SA_RS04225	SA0742	clumping factor A	848484..851453		Ge348
850655	850829	5	SA_RS04225	SA0742	clumping factor A	848484..851453		La024
850766	850871	8	SA_RS04225	SA0742	clumping factor A	848484..851453		DE813,DE805,DE814,DE826
850889	851021	9	SA_RS04225	SA0742	clumping factor A	848484..851453		FI535
1027883	1028385	7	SA_RS05135	SA0905	bifunctional autolysin	1026342..1030088		DE812
1117973	1118047	8	SA_RS05590	SA0986	phenylalanine--tRNA ligase subunit beta	1115371..1117773		DE813,Ge336
1442893	1443187	8	SA_RS14715		hyperosmolarity resistance protein Ebh	1437928..1469802	internal stop; Derived by automated computational analysis using gene prediction method: Protein Homology /pseudo	HU578
1444782	1446652	8	SA_RS14715		hyperosmolarity resistance protein Ebh	1437928..1469802	internal stop; Derived by automated computational analysis using gene prediction method: Protein Homology /pseudo	IT705,La005
1452067	1453916	10	SA_RS14715		hyperosmolarity resistance protein Ebh	1437928..1469802	internal stop; Derived by automated computational analysis using gene prediction method: Protein Homology /pseudo	IT574
1475043	1475055	5	SA_RS07210	SA1272	alanine dehydrogenase	1474235..1475353		AT517
1882158	1882171	4	SA_RS09290	SAtRNA22	tRNA-Gly	1882155..1882228		AT517
1882158	1882171	4	SA_RS09290	SAtRNA22	tRNA-Gly	1882155..1882228		AT513,AT517
2353031	2353042	5	SA_RS12025	SA2093	CHAP domain-containing protein	2352596..2353399		SI576
2475686	2475717	5			Non coding region			IT701,IT544,HR528,DE823,DE820,HR531,HR522,PL510,PL511,,HR530,HR532,HR533,SE561,SE507,SE508,SE501,SE505,SE502,SE506,SI577,SI576,DE822,,DE816,HR524,CZ575,SE504,SE503,HR525,HR523,HR527,HR526,DE509,DE809,DE829,DE819,DE817,DE818,DE828,La233,HR534,HR529,IT545,Vd466,BE604,BE603,BE611,BE609,BE601,BE607,BE608,BE610,BE602,BE605,BE606,PL512,PL562,IT559,IT709,IT551,IT571,IT570,IT568,IT567,IT564,IT550,IT555,E…
2718844	2719012	7	SA_RS13895	SA2423	clumping factor B	2718295..2720928		DE801
2719060	2719126	8	SA_RS13895	SA2423	clumping factor B	2718295..2720928		DE822
2719099	2719159	9	SA_RS13895	SA2423	clumping factor B	2718295..2720928		Ge358
* Gene information according to the reference genome N315 (accession number: NC_002745.2)
