# Supplementary material for: Phylogeographical Analysis Reveals the Historic Origin, Emergence, and Evolutionary Dynamics of Methicillin-Resistant Staphylococcus aureus ST228
Source: Front Microbiol. 2020 Aug 26;11:2063. doi: 10.3389/fmicb.2020.02063 (PMC7479193; doi:10.3389/fmicb.2020.02063)
Supplement: TABLE S3 — Resistance and virulence factors detected in the 530 MRSA genomes. [file Table_3.XLSX]

## Sheet: argannote_Resistome_Abricate
Isolate_ID	NUM_FOUND	aph	aac(6’)-aph(2”)	aadD	ant(6)-Ia	aph(3’)-IIIa	sat4	ant(9)-Ia	blaZ	mecA	fosB3	norA	erm(33)	ermA	cat(pC221)	dha1	tet(38)	tet(K)	tet(L)	tetM	dfrC
AT513	13	1777261-1778061	2884156-2885595	-	2867586-2868494	2866160-2866954	2867047-2867589	1664827-1665609	3427-4272	15023-17029	2351099-2351518	707948-709114	-	1663970-1664701	-	2479836-2481023	107807-109159	-	-	-	-
AT514	13	1678124-1678924	2824847-2826286	-	2842010-2842918	2840584-2841378	2841471-2842013	1565914-1566696	3431-4276	2714440-2716446	2259396-2259815	609603-610769	-	1565057-1565788	-	2388072-2389259	2807495-2808847	-	-	-	-
AT515	13	1677723-1678523	2817795-2819234	-	2827574-2828484	2826148-2826942	2827035-2827577	1565748-1566530	3427-4272	2682912-2684918	2227970-2228389	608904-610070	-	1564891-1565622	-	2356646-2357833	2775969-2777321	-	-	-	-
AT516	13	1708300-1709100	2826036-2827475	-	2820433-2821341	2821973-2822767	2821338-2821880	1596069-1596851	3429-4274	2698540-2700546	2243661-2244080	607607-608773	-	1595212-1595943	-	2372337-2373524	2791594-2792946	-	-	-	-
AT517	13	1742798-1743598	2796839-2798278	-	2817193-2818101	2815767-2816561	2816654-2817196	1630823-1631605	3425-4270	2688800-2690806	2231804-2232223	603561-604727	-	1629966-1630697	-	2360541-2361728	2781933-2783285	-	-	-	-
AT518	13	1684602-1685402	2842213-2843652	-	2828461-2829369	2827035-2827829	2827922-2828464	1572627-1573409	2796480-2797325	2689473-2691479	2234364-2234783	585435-586601	-	1571770-1572501	-	2363040-2364227	2782528-2783880	-	-	-	-
AT520	13	1687142-1687942	2846231-2847670	-	2834490-2835400	2833064-2833858	2833951-2834493	1575167-1575949	2799292-2800137	2692257-2694263	2237082-2237501	586525-587691	-	1574310-1575041	-	2365897-2367084	2785340-2786692	-	-	-	-
BE601	13	1734753-1735553	2774913-2776352	-	1997219-1998127	1998759-1999553	1998124-1998666	1622794-1623576	793918-794763	1973943-1975949	630872-631291	2630146-2631312	-	1621937-1622668	-	925809-926996	1881815-1883167	-	-	-	-
BE602	13	1784014-1784814	2850930-2852369	-	2825559-2826467	2827099-2827893	2826464-2827006	1672039-1672821	3419-4264	25927-27933	2334056-2334475	715463-716629	-	1671182-1671913	-	2463115-2464302	118845-120197	-	-	-	-
BE603	11	1851275-1852075	2832945-2834384	-	2824424-2825332	2822998-2823792	2823885-2824427	-	3429-4274	101789-103795	2400851-2401270	788898-790064	-	-	-	2529801-2530988	193950-195302	-	-	-	-
BE604	13	2480535-2481335	2413728-2415167	-	1410027-1410935	1408601-1409395	1409488-1410030	2592571-2593353	277555-278400	1219965-1221971	104667-105086	1862412-1863578	-	2593479-2594210	-	1446309-1447496	1127363-1128715	-	-	-	-
BE605	13	2190378-2191178	2666514-2667953	-	2565601-2566509	2564175-2564969	2565062-2565604	2302436-2303218	18951-19796	1554976-1556982	600563-600982	1605081-1606247	-	2303344-2304075	-	1162549-1163736	2082848-2084200	-	-	-	-
BE606	13	1859709-1860509	2839386-2840825	-	2849078-2849986	2847652-2848446	2848539-2849081	1747734-1748516	101938-102783	78572-80578	2409593-2410012	790862-792028	-	1746877-1747608	-	2538551-2539738	194614-195966	-	-	-	-
BE607	16	1764863-1765663	2865852-2867291	426-1196	2879195-2880103	2877769-2878563	2878656-2879198	1652799-1653581	2806026-2806871	8263-10269	2347803-2348222	696573-697739	-	1651942-1652673	-	2476757-2477944	101056-102408	-	1503-2879	-	2864621-2865106
BE608	13	495686-496486	2694700-2696139	-	2303594-2304502	2302168-2302962	2303055-2303597	383726-384508	1284084-1284929	2587157-2589163	1505529-1505948	2807949-2809115	-	382869-383600	-	697319-698506	2680213-2681565	-	-	-	-
BE609	13	2246753-2247553	2416729-2418168	-	828900-829808	830440-831234	829805-830347	2134793-2135575	3427-4272	1475254-1477260	1067198-1067617	556389-557555	-	2133936-2134667	-	1339445-1340632	1383057-1384409	-	-	-	-
BE610	13	1783503-1784303	2832439-2833878	-	2842291-2843199	2843831-2844625	2843196-2843738	1671489-1672271	26106-26951	2737-4743	2333204-2333623	714959-716125	-	1670632-1671363	-	2462154-2463341	118844-120196	-	-	-	-
BE611	13	1861119-1861919	2845043-2846482	-	2834474-2835382	2836014-2836808	2835379-2835921	1749159-1749941	103672-104517	78572-80578	2410773-2411192	792707-793873	-	1748302-1749033	-	2539727-2540914	194839-196191	-	-	-	-
BG560	15	1521224-1522024	2260619-2262058	-	2271577-2272485	2273117-2273911	2272482-2273024	1633217-1633999	694488-695333	2072578-2074584	492181-492600	2042964-2044130	-	1634125-1634856	2435398-2436045	2525293-2526480	1815419-1816771	2431943-2433322	-	-	-
CZ575	13	1685756-1686556	2843615-2845054	-	2830923-2831831	2829497-2830291	2830384-2830926	1573602-1574384	3429-4274	2700695-2702701	2242949-2243368	608875-610041	-	1572745-1573476	-	2371625-2372812	2793872-2795224	-	-	-	-
DE509	13	1851993-1852793	2821053-2822492	-	2809151-2810059	2807725-2808519	2808612-2809154	1740020-1740802	3944-4789	82098-84104	2401430-2401849	751660-752826	-	1739163-1739894	-	2530437-2531624	175168-176520	-	-	-	-
DE801	13	1770968-1771768	2731385-2732824	-	2722014-2722922	2720588-2721382	2721475-2722017	2698723-2699505	19428-20273	55895-57901	2276717-2277136	672240-673406	-	2697866-2698597	-	2404201-2405388	148855-150207	-	-	-	-
DE802	10	735152-735952	2769966-2771405	-	-	-	-	340288-341070	201505-202350	2069512-2071518	2642310-2642729	1132654-1133820	-	339431-340162	-	656984-658171	1977206-1978558	-	-	-	-
DE803	11	1698047-1698847	2835564-2837003	-	-	-	-	1586072-1586854	3433-4278	2667891-2669897	2210599-2211018	608043-609209	-	1585215-1585946	2810762-2811409	2339275-2340462	2760707-2762059	-	-	-	-
DE804	10	1718277-1719077	2794934-2796373	-	-	-	-	1606194-1606976	2540744-2541589	2730707-2732713	2267718-2268137	660051-661217	-	1605337-1606068	-	2396394-2397581	64202-65554	-	-	-	-
DE805	13	1716368-1717168	2847642-2849081	-	2843221-2844129	2841795-2842589	2842682-2843224	1605823-1606605	3429-4274	2722205-2724211	2264168-2264587	609631-610797	-	1606731-1607462	-	2392921-2394108	2808808-2810160	-	-	-	-
DE806	13	1858082-1858882	2889001-2890440	-	2879327-2880235	2880867-2881661	2880232-2880774	1970075-1970857	3429-4274	1525105-1527111	1067333-1067752	644655-645821	-	1970983-1971714	-	1195999-1197186	1618083-1619435	-	-	-	-
DE807	13	2317042-2317842	2245843-2247282	-	2254380-2255288	2255920-2256714	2255285-2255827	2429097-2429879	3421-4266	1612964-1614970	2090848-2091267	1801531-1802697	-	2430005-2430736	-	1961404-1962591	849241-850593	-	-	-	-
DE808	13	952725-953525	2269895-2271334	-	2087767-2088675	2089307-2090101	2088672-2089214	1064717-1065499	840085-840930	2263884-2265890	1887454-1887873	2225445-2226611	-	1065625-1066356	-	2016130-2017317	382985-384337	-	-	-	-
DE809	13	421884-422684	2442877-2444316	-	1132830-1133738	1134370-1135164	1133735-1134277	309910-310692	802809-803654	1810489-1812495	889597-890016	2176100-2177266	-	309053-309784	-	1048779-1049966	1718266-1719618	-	-	-	-
DE810	12	468780-469580	2465969-2467408	-	1947127-1948035	1945701-1946495	1946588-1947130	356806-357588	-	1230773-1232779	2357541-2357960	948937-950103	-	355949-356680	-	2228097-2229284	756661-758013	-	-	-	-
DE811	13	1830631-1831431	2244703-2246142	-	521124-522032	522664-523458	522029-522571	1718657-1719439	35907-36752	2222171-2224177	1364296-1364715	2250029-2251195	-	1717800-1718531	-	1492972-1494159	2470263-2471615	-	-	-	-
DE812	13	180255-181055	1846690-1848129	-	2565917-2566825	2567457-2568251	2566822-2567364	292247-293029	537263-538108	1657062-1659068	2429609-2430028	1966555-1967721	-	293155-293886	-	2300181-2301368	1564836-1566188	-	-	-	-
DE813	13	1772849-1773649	2791910-2793349	-	2769507-2770415	2768081-2768875	2768968-2769510	1660874-1661656	4071-4916	2733255-2735261	2275729-2276148	664356-665522	-	1660017-1660748	-	2404282-2405469	89373-90725	-	-	-	-
DE814	13	540720-541520	2628713-2630152	-	1676940-1677848	1678480-1679274	1677845-1678387	428745-429527	3949-4794	2269344-2271350	1490927-1491346	898489-899655	-	427888-428619	-	1361483-1362670	2177083-2178435	-	-	-	-
DE815	13	1269138-1269938	2660841-2662280	-	2324831-2325739	2326371-2327165	2325736-2326278	164444-165226	1346492-1347337	2128033-2130039	1041850-1042269	1706306-1707472	-	165352-166083	-	912406-913593	2402223-2403575	-	-	-	-
DE816	13	2289824-2290624	1927164-1928603	-	1492520-1493428	1494060-1494854	1493425-1493967	2401816-2402598	60825-61670	610003-612009	1324508-1324927	2631990-2633156	-	2402724-2403455	-	1453329-1454516	1051313-1052665	-	-	-	-
DE817	13	644141-644941	2436455-2437894	-	1958697-1959605	1957271-1958065	1958158-1958700	756225-757007	1407880-1408725	2397947-2399953	356354-356773	2089455-2090621	-	757133-757864	-	98037-99224	1795812-1797164	-	-	-	-
DE818	13	1442331-1443131	2834414-2835853	-	2830888-2831796	2829462-2830256	2830349-2830891	1330357-1331139	19815-20660	2446312-2448318	1992564-1992983	342595-343761	-	1329500-1330231	-	2121551-2122738	2539441-2540793	-	-	-	-
DE819	13	1760577-1761377	2842896-2844335	-	2839670-2840578	2838244-2839038	2839131-2839673	1648532-1649314	19780-20625	2770148-2772154	2312328-2312747	691086-692252	-	1647675-1648406	-	2441274-2442461	96388-97740	-	-	-	-
DE820	13	1789768-1790568	2798087-2799526	-	2783138-2784046	2781712-2782506	2782599-2783141	1677672-1678454	3427-4272	2673972-2675978	2216261-2216680	603038-604204	-	1676815-1677546	-	2345266-2346453	2767116-2768468	-	-	-	-
DE821	13	418106-418906	2095622-2097061	-	2080763-2081671	2082303-2083097	2081668-2082210	530070-530852	23508-24353	1853001-1855007	2685904-2686323	15491-16657	-	530978-531709	-	2814580-2815767	248845-250197	-	-	-	-
DE822	13	1800178-1800978	2834457-2835896	-	2840309-2841217	2841849-2842643	2841214-2841756	1687955-1688737	4071-4916	2807144-2809150	2349539-2349958	691960-693126	-	1687098-1687829	-	2478539-2479726	96349-97701	-	-	-	-
DE823	13	788173-788973	1223662-1225101	-	307440-308348	308980-309774	308345-308887	1749758-1750540	47942-48787	1411550-1413556	498413-498833	2193276-2194442	-	1750666-1751397	-	2008321-2009508	1504326-1505678	-	-	-	-
DE824	13	1771081-1771881	2830508-2831947	-	2825059-2825967	2823633-2824427	2824520-2825062	1658852-1659634	3429-4274	27052-29058	2321294-2321713	715906-717072	-	1657995-1658726	-	2449848-2451035	119292-120644	-	-	-	-
DE825	13	520256-521056	2536689-2538128	-	2395156-2396064	2396696-2397490	2396061-2396603	632368-633150	1631030-1631875	201991-203997	1971807-1972226	2138441-2139607	-	633276-634007	-	1842424-1843611	2382522-2383874	-	-	-	-
DE826	12	1812220-1813020	2783699-2785138	-	2771883-2772791	2773423-2774217	2772788-2773330	1924212-1924994	-	1480985-1482991	1023783-1024202	607903-609069	-	1925120-1925851	-	1152458-1153645	1573948-1575300	-	-	-	-
DE827	14	2420000-2420800	798669-800108	-	1334898-1335806	1336438-1337232	1335803-1336345	2308025-2308807	19010-19855	1478047-1480053	284369-284788	26703-27869	-	2307168-2307899	430382-431029	1066617-1067804	1385787-1387139	-	-	-	-
DE828	12	1654317-1655117	2818607-2820046	-	2803191-2804099	2801765-2802559	2802652-2803194	1542343-1543125	-	2661856-2663862	2204314-2204733	586178-587344	-	1541486-1542217	-	2333258-2334445	2754349-2755701	-	-	-	-
DE829	13	1673603-1674403	2838314-2839753	-	2824283-2825191	2825823-2826617	2825188-2825730	1561629-1562411	3944-4789	2680843-2682849	2223130-2223549	604569-605735	-	1560772-1561503	-	2352080-2353267	2773875-2775227	-	-	-	-
ES536	13	1695305-1696105	2846508-2847947	-	2836076-2836984	2834650-2835444	2835537-2836079	1582978-1583760	3427-4272	2702601-2704607	2245011-2245430	595539-596705	-	1582121-1582852	-	2373956-2375143	2795666-2797018	-	-	-	-
FI535	13	1720920-1721720	2892163-2893602	-	2879738-2880646	2878312-2879106	2879199-2879741	1608705-1609487	3429-4274	2728271-2730277	2270907-2271326	652526-653692	-	1607765-1607964	-	2399644-2400831	2820832-2822184	-	-	-	-
Ge301	10	1651503-1652303	2845135-2846574	-	-	-	-	1539528-1540310	2790944-2791789	2683838-2685844	2226296-2226715	584315-585481	-	1538671-1539402	-	2355515-2356702	2777012-2778364	-	-	-	-
Ge302	10	1668574-1669374	2855418-2856857	-	-	-	-	2822460-2823242	3421-4266	2668102-2670108	2210741-2211160	607557-608723	-	2821603-2822334	-	2339896-2341083	2761158-2762510	-	-	-	-
Ge303	10	1670223-1671023	2835314-2836753	-	-	-	-	2817077-2817859	3417-4262	2705336-2707342	2247975-2248394	607543-608709	-	2816220-2816951	-	2377249-2378436	2798296-2799648	-	-	-	-
Ge304	10	1709646-1710446	2854609-2856048	-	-	-	-	2778030-2778812	3421-4266	2713880-2715886	2254627-2255046	649226-650392	-	2777173-2777904	-	2385481-2386668	54509-55861	-	-	-	-
Ge305	10	1668464-1669264	2852292-2853731	-	-	-	-	2809069-2809851	3417-4262	2670296-2672302	2212699-2213118	607480-608646	-	2809977-2810708	-	2341838-2343025	2763349-2764701	-	-	-	-
Ge306	10	1669447-1670247	2815962-2817401	-	-	-	-	2811609-2812391	3423-4268	2671861-2673867	2212583-2213002	607813-608979	-	2812517-2813248	-	2343578-2344765	2764768-2766120	-	-	-	-
Ge307	10	1677396-1678196	2831747-2833186	-	-	-	-	1565421-1566203	3429-4274	2679175-2681181	2221478-2221897	609295-610461	-	1564564-1565295	-	2350427-2351614	2772389-2773741	-	-	-	-
Ge308	10	1167462-1168262	2847127-2848566	-	-	-	-	2835660-2836442	3427-4272	133181-135187	2417319-2417738	821063-822229	-	2834803-2835534	-	2546266-2547453	226191-227543	-	-	-	-
Ge309	10	1676048-1676848	2850994-2852433	-	-	-	-	1564073-1564855	3427-4272	2675155-2677161	2217578-2217997	607710-608876	-	1563216-1563947	-	2346584-2347771	2768103-2769455	-	-	-	-
Ge310	10	1670242-1671042	2840140-2841579	-	-	-	-	2831972-2832754	3423-4268	2708053-2710059	2250443-2250862	608720-609886	-	2832880-2833611	-	2379739-2380926	2801017-2802369	-	-	-	-
Ge311	10	1705892-1706692	2853002-2854441	-	-	-	-	2818850-2819632	3421-4266	2705930-2707936	2247825-2248244	649771-650937	-	2817993-2818724	-	2377038-2378225	54568-55920	-	-	-	-
Ge312	10	1831238-1832038	2881057-2882496	-	-	-	-	2817151-2817933	3427-4272	1483093-1485099	1025373-1025792	607637-608803	-	2816294-2817025	-	1154652-1155839	1576149-1577501	-	-	-	-
Ge313	11	1854635-1855435	2887644-2889083	340-1110	-	-	-	2873790-2874572	2791233-2792078	104552-106558	2433130-2433549	792713-793879	-	2874698-2875429	-	2562293-2563480	197713-199065	-	-	-	-
Ge314	10	1669658-1670458	2840085-2841524	-	-	-	-	2810303-2811085	3427-4272	2672779-2674785	2213510-2213929	607752-608918	-	2809446-2810177	-	2344388-2345575	2765794-2767146	-	-	-	-
Ge315	10	1670139-1670939	2835025-2836464	-	-	-	-	2818251-2819033	3427-4272	2671435-2673441	2213822-2214241	607999-609165	-	2817394-2818125	-	2343081-2344268	2764375-2765727	-	-	-	-
Ge316	10	1668833-1669633	2856082-2857521	-	-	-	-	2824558-2825340	3421-4266	2709890-2711896	2250460-2250879	607592-608758	-	2823701-2824432	-	2381445-2382632	2802527-2803879	-	-	-	-
Ge318	10	1670090-1670890	2866450-2867889	-	-	-	-	2843971-2844753	3417-4262	2705020-2707026	2247639-2248058	608875-610041	-	2844879-2845610	-	2376778-2377965	2797991-2799343	-	-	-	-
Ge319	11	1811783-1812583	2871729-2873168	393-1163	-	-	-	2857167-2857949	4929-5774	112514-114520	2403981-2404400	750831-751997	-	2856310-2857041	-	2534851-2536038	205650-207002	-	-	-	-
Ge320	10	897678-898478	2781877-2783316	-	-	-	-	2739026-2739808	3417-4262	2606398-2608404	2147392-2147811	536085-537251	-	2739934-2740665	-	2278230-2279417	2699348-2700700	-	-	-	-
Ge321	10	1751953-1752753	2827637-2829076	-	-	-	-	2821608-2822390	3427-4272	2755245-2757251	2295899-2296318	689797-690963	-	2820751-2821482	-	2426856-2428043	94654-96006	-	-	-	-
Ge322	10	1667809-1668609	2856656-2858095	-	-	-	-	2843877-2844659	3896-4741	2685744-2687750	2220775-2221194	608808-609974	-	2844785-2845516	-	2351629-2352816	2778704-2780056	-	-	-	-
Ge323	10	1711226-1712026	2825515-2826954	-	-	-	-	2803405-2804187	3423-4268	2697232-2699238	2239994-2240413	650283-651449	-	2804313-2805044	-	2368933-2370120	55150-56502	-	-	-	-
Ge324	10	1670480-1671280	2845978-2847417	-	-	-	-	2850083-2850865	3427-4272	2673685-2675691	2216009-2216428	608157-609323	-	2849226-2849957	-	2345187-2346374	2766097-2767449	-	-	-	-
Ge325	10	1771004-1771804	2867530-2868971	-	-	-	-	2842558-2843340	3399-4244	25726-27732	2321609-2322028	711735-712901	-	2843466-2844197	-	2450401-2451588	118151-119503	-	-	-	-
Ge326	10	1711837-1712637	2837488-2838927	-	-	-	-	2822430-2823212	3429-4274	2713966-2715972	2256362-2256781	650941-652107	-	2821573-2822304	-	2385549-2386736	54508-55860	-	-	-	-
Ge327	10	1772719-1773519	2881895-2883334	-	-	-	-	2850858-2851640	3397-4242	25716-27722	2325901-2326320	712050-713216	-	2850001-2850732	-	2454910-2456097	118521-119873	-	-	-	-
Ge328	10	1676213-1677013	2826821-2828260	-	-	-	-	1564238-1565020	3429-4274	2677237-2679243	2220056-2220475	607935-609101	-	1563381-1564112	-	2348610-2349797	2770261-2771613	-	-	-	-
Ge329	10	1776604-1777404	2917329-2918768	-	-	-	-	2853798-2854580	3427-4272	25937-27943	2347259-2347678	714282-715448	-	2852941-2853672	-	2478217-2479404	119112-120464	-	-	-	-
Ge330	10	1775871-1776671	2841878-2843317	-	-	-	-	2838748-2839530	3429-4274	25943-27949	2344529-2344948	713974-715140	-	2839656-2840387	-	2473716-2474903	119003-120355	-	-	-	-
Ge331	10	1758369-1759169	2828612-2830051	-	-	-	-	1646394-1647176	3429-4274	2761952-2763958	2304835-2305254	690737-691903	-	1645537-1646268	-	2433389-2434576	95708-97060	-	-	-	-
Ge332	10	1676223-1677023	2877519-2878958	-	-	-	-	1564248-1565030	3417-4262	2677963-2679969	2221005-2221424	608714-609880	-	1563391-1564122	-	2349686-2350873	2770894-2772246	-	-	-	-
Ge333	10	1672193-1672993	2835915-2837354	-	-	-	-	2811996-2812778	3431-4276	2671176-2673182	2213720-2214139	609932-611098	-	2812904-2813635	-	2342914-2344101	2763944-2765296	-	-	-	-
Ge334	10	1694814-1695614	2853286-2854725	-	-	-	-	2812141-2812923	3433-4278	2674050-2676056	2216103-2216522	632073-633239	-	2813049-2813780	-	2345577-2346764	2767017-2768369	-	-	-	-
Ge335	10	1790222-1791022	2836727-2838166	-	-	-	-	2832203-2832985	3431-4276	38686-40692	2334687-2335106	727599-728765	-	2833111-2833842	-	2464237-2465424	131742-133094	-	-	-	-
Ge336	10	1706149-1706949	2835143-2836582	-	-	-	-	1594174-1594956	3429-4274	2738808-2740814	2246565-2246984	639202-640368	-	1593317-1594048	-	2375571-2376758	42749-44101	-	-	-	-
Ge337	10	1002726-1003526	2848247-2849686	-	-	-	-	2823113-2823895	3425-4270	2716716-2718722	2251361-2251780	649642-650808	-	2824021-2824752	-	2382353-2383540	54511-55863	-	-	-	-
Ge338	10	1675876-1676676	2827878-2829317	-	-	-	-	1563901-1564683	4071-4916	2677119-2679125	2220293-2220712	608166-609332	-	1563044-1563775	-	2348847-2350034	2770138-2771490	-	-	-	-
Ge339	10	1775393-1776193	2864170-2865609	-	-	-	-	2859307-2860089	3427-4272	25937-27943	2326856-2327212	714397-715563	-	2860215-2860946	-	2456040-2457227	118995-120347	-	-	-	-
Ge340	10	1670408-1671208	2851556-2852995	-	-	-	-	2821163-2821945	3429-4274	2674064-2676070	2215673-2216092	569463-570629	-	2822071-2822802	-	2345228-2346415	2766821-2768173	-	-	-	-
Ge341	10	1670706-1671506	2850075-2851514	-	-	-	-	2829059-2829841	3429-4274	2703496-2705502	2245028-2245447	608430-609596	-	2828202-2828933	-	2374334-2375521	2796625-2797977	-	-	-	-
Ge342	10	1670325-1671125	2844746-2846185	-	-	-	-	2835156-2835938	3429-4274	2706828-2708834	2249211-2249630	608060-609226	-	2834299-2835030	-	2378398-2379585	2799884-2801236	-	-	-	-
Ge343	10	1829177-1829977	2830249-2831688	-	-	-	-	1941170-1941952	3415-4260	1480607-1482613	1023832-1024251	607359-608525	-	1942078-1942809	-	1152386-1153573	1573477-1574829	-	-	-	-
Ge344	10	1646705-1647505	2856897-2858336	-	-	-	-	1534730-1535512	3415-4260	2686621-2688627	2228962-2229381	579002-580168	-	1533873-1534604	-	2357641-2358828	2779050-2780351	-	-	-	-
Ge345	10	1405701-1406501	2839067-2840506	-	-	-	-	2805584-2806366	3429-4274	2391177-2393183	1933320-1933739	342858-344024	-	2806492-2807223	-	2062506-2063693	2484119-2485471	-	-	-	-
Ge346	10	1676496-1677296	2842868-2844307	-	-	-	-	1564521-1565303	3427-4272	2676469-2678475	2219592-2220011	607855-609021	-	1563664-1564395	-	2348209-2349396	2769547-2770899	-	-	-	-
Ge347	10	1669323-1670123	2824254-2825693	-	-	-	-	2796561-2797343	3427-4272	2657618-2659624	2197975-2198394	608000-609166	-	2795704-2796435	-	2329108-2330295	2750503-2751855	-	-	-	-
Ge348	10	1670929-1671729	2834692-2836131	-	-	-	-	2823080-2823862	3425-4270	2671730-2673736	2214152-2214571	608027-609193	-	2823988-2824719	-	2343323-2344510	2763353-2764705	-	-	-	-
Ge349	10	1781669-1782469	2855545-2856984	-	-	-	-	1669694-1670476	3427-4272	25977-27983	2333307-2333726	713873-715039	-	1668837-1669568	-	2461864-2463051	118808-120160	-	-	-	-
Ge350	10	1676270-1677070	2854065-2855504	-	-	-	-	1564295-1565077	3427-4272	2676406-2678412	2219221-2219640	608507-609673	-	1563438-1564169	-	2347880-2349067	2769331-2770683	-	-	-	-
Ge351	11	1782654-1783454	2905053-2906492	23559-24329	-	-	-	1670679-1671461	3419-4264	27391-29397	2350476-2350895	715167-716333	-	1669822-1670553	-	2479031-2480218	120172-121524	-	-	-	-
Ge352	10	1777585-1778385	2843709-2845148	-	-	-	-	2855600-2856382	3550-4395	26056-28062	2321779-2322198	714739-715905	-	2854743-2855474	-	2450949-2452136	119199-120551	-	-	-	-
Ge353	10	1769718-1770518	2870833-2872272	-	-	-	-	2885920-2886702	3395-4240	25710-27716	2319018-2319437	709044-710210	-	2886828-2887559	-	2448007-2449194	115711-117063	-	-	-	-
Ge354	10	1670237-1671037	2831319-2832758	-	-	-	-	2820074-2820856	3425-4270	2670828-2672834	2213041-2213460	608387-609553	-	2819217-2819948	-	2342360-2343547	2763970-2765322	-	-	-	-
Ge355	10	1676648-1677448	2878201-2879640	-	-	-	-	1564673-1565455	3425-4270	2681629-2683635	2223750-2224169	609084-610250	-	1563816-1564547	-	2352307-2353494	2774554-2775906	-	-	-	-
Ge356	10	1669216-1670016	2838601-2840040	-	-	-	-	2815816-2816598	3425-4270	2671606-2673612	2212141-2212560	608219-609385	-	2816724-2817455	-	2343010-2344197	2764759-2766111	-	-	-	-
Ge357	10	1676564-1677364	2873765-2875204	-	-	-	-	1564495-1565277	3429-4274	2680360-2682366	2222699-2223118	608215-609381	-	1563638-1564369	-	2351256-2352443	2773403-2774755	-	-	-	-
Ge358	10	1775492-1776292	2845979-2847418	-	-	-	-	2814524-2815306	3423-4268	25743-27749	2324704-2325123	713579-714745	-	2813667-2814398	-	2453865-2455052	118798-120150	-	-	-	-
Ge359	10	1674707-1675507	2874325-2875764	-	-	-	-	1562732-1563514	3411-4256	2674168-2676174	2217154-2217573	607452-608618	-	1561875-1562606	-	2345829-2347016	2765976-2767328	-	-	-	-
Ge360	10	1775481-1776281	2895077-2896516	-	-	-	-	2884498-2885280	3421-4266	25919-27925	2326355-2326774	713561-714727	-	2883641-2884372	-	2455676-2456863	118540-119892	-	-	-	-
Ge361	10	1775867-1776667	2886480-2887919	-	-	-	-	2854674-2855456	3427-4272	25937-27943	2348860-2349279	713817-714983	-	2855582-2856313	-	2478038-2479225	118993-120345	-	-	-	-
Ge362	10	1750883-1751683	2824957-2826396	-	-	-	-	2818296-2819078	3415-4260	2752036-2754042	2294572-2294991	690419-691585	-	2817439-2818170	-	2423702-2424889	95779-97131	-	-	-	-
Ge363	10	1833898-1834698	2856996-2858435	-	-	-	-	2841995-2842777	3421-4266	25965-27971	1131643-1132062	714808-715974	-	2841138-2841869	-	1261018-1262205	119451-120803	-	-	-	-
Ge364	10	1669815-1670615	2836999-2838438	-	-	-	-	2796220-2797002	3425-4270	2657363-2659369	2199724-2200143	608129-609295	-	2795363-2796094	-	2328895-2330082	2750248-2751600	-	-	-	-
Ge365	10	1776130-1776930	2877057-2878496	-	-	-	-	2846786-2847568	3423-4268	25925-27931	2304814-2305233	714122-715288	-	2847694-2848425	-	2433915-2435102	119070-120422	-	-	-	-
Ge366	10	1771114-1771914	2876412-2877851	-	-	-	-	2847206-2847988	3421-4266	25919-27925	2344019-2344438	709408-710574	-	2848114-2848845	-	2473172-2474359	118975-120327	-	-	-	-
Ge367	10	1670695-1671495	2834501-2835940	-	-	-	-	2791658-2792440	3552-4397	2684128-2686134	2226358-2226777	608740-609906	-	2790801-2791532	-	2355536-2356723	2777268-2778620	-	-	-	-
Ge368	10	1776119-1776919	2890154-2891593	-	-	-	-	2847826-2848608	3550-4395	26056-28062	2321006-2321425	713748-714914	-	2846969-2847700	-	2450176-2451363	119183-120535	-	-	-	-
Ge369	10	1832795-1833595	2886045-2887484	-	-	-	-	2833709-2834491	3421-4266	1479002-1481008	1021352-1021771	607615-608781	-	2834617-2835348	-	1150637-1151824	1572058-1573410	-	-	-	-
Ge370	10	1775478-1776278	2901823-2903262	-	-	-	-	2778726-2779508	3423-4268	25925-27931	2321953-2322372	714165-715331	-	2777869-2778600	-	2451115-2452302	119057-120409	-	-	-	-
Ge371	10	1775885-1776685	2883943-2885382	-	-	-	-	2854093-2854875	3421-4266	25919-27925	2328551-2328970	714087-715253	-	2853236-2853967	-	2457772-2458959	119083-120435	-	-	-	-
Ge372	10	1669963-1670763	2858948-2860387	-	-	-	-	2852985-2853767	3554-4399	2672918-2674924	2215054-2215473	608258-609424	-	2852128-2852859	-	2344324-2345511	2765897-2767249	-	-	-	-
Ge373	10	1776448-1777248	2870906-2872345	-	-	-	-	2840528-2841310	3552-4397	26061-28067	2326149-2326568	714442-715608	-	2839671-2840402	-	2455326-2456513	119197-120549	-	-	-	-
Ge374	10	1668926-1669726	2862217-2863656	-	-	-	-	2779266-2780048	3423-4268	2673551-2675557	2215982-2216401	607366-608532	-	2778409-2779140	-	2345144-2346331	2766606-2767958	-	-	-	-
Ge375	10	1774472-1775272	2861618-2863057	-	-	-	-	2848432-2849214	3423-4268	25925-27931	2320819-2321238	714983-716149	-	2849340-2850071	-	2450228-2451415	119353-120705	-	-	-	-
Ge377	10	1752049-1752849	2849823-2851262	-	-	-	-	2822236-2823018	3413-4258	2756849-2758855	2299358-2299777	689910-691076	-	2823144-2823875	-	2428419-2429606	95473-96825	-	-	-	-
Ge378	10	1819464-1820264	2908793-2910232	-	-	-	-	2846390-2847172	3556-4401	15327-17333	1120257-1120676	703198-704364	-	2845533-2846264	-	1249451-1250638	108130-109482	-	-	-	-
Ge379	10	1776485-1777285	2879680-2881119	-	-	-	-	2814300-2815082	3554-4399	26068-28074	2345552-2345971	714469-715635	-	2815208-2815939	-	2474738-2475925	119242-120594	-	-	-	-
Ge380	10	1797165-1797965	2878747-2880186	-	-	-	-	2866106-2866888	3552-4397	26062-28068	2343569-2343988	735251-736417	-	2867014-2867745	-	2472747-2473934	118735-120087	-	-	-	-
Ge381	10	1837654-1838454	2873750-2875189	-	-	-	-	1725679-1726461	4075-4920	82305-84311	2416633-2417052	771659-772825	-	1724822-1725553	-	2545678-2546865	175440-176792	-	-	-	-
Ge382	10	1825396-1826196	2831882-2833321	-	-	-	-	2839384-2840166	3421-4266	25919-27925	1129345-1129764	712939-714105	-	2838527-2839258	-	1258499-1259686	118462-119814	-	-	-	-
Ge383	10	1776725-1777525	2872253-2873692	-	-	-	-	2857245-2858027	3425-4270	25931-27937	2326555-2326974	714378-715544	-	2858153-2858884	-	2455459-2456646	119033-120385	-	-	-	-
Ge384	10	1726736-1727536	2871497-2872936	-	-	-	-	2851364-2852146	3421-4266	25919-27925	2320514-2320933	664529-665695	-	2852272-2853003	-	2449410-2450597	119141-120493	-	-	-	-
Ge385	10	1670113-1670913	2895990-2897429	-	-	-	-	2873179-2873961	3421-4266	2672181-2674187	2214753-2215172	608534-609700	-	2872322-2873053	-	2343907-2345094	2764852-2766204	-	-	-	-
Ge386	10	1776484-1777284	2846586-2848025	-	-	-	-	2851546-2852328	3552-4397	26062-28068	2324241-2324660	714494-715660	-	2850689-2851420	-	2453149-2454336	119116-120468	-	-	-	-
Ge387	9	1645461-1646261	2846619-2848058	-	-	-	-	2791151-2791933	-	2656892-2658898	2199426-2199845	583562-584728	-	2792059-2792790	-	2328586-2329773	2749775-2751127	-	-	-	-
Ge388	10	1834503-1835303	2906010-2907449	-	-	-	-	2853683-2854465	3423-4268	1481876-1483882	1024439-1024858	607587-608753	-	2852826-2853557	-	1153601-1154788	1574931-1576283	-	-	-	-
Ge389	10	1752186-1752986	2878845-2880284	-	-	-	-	2863294-2864076	2771927-2772772	2693-4699	2298477-2298896	690515-691681	-	2862437-2863168	-	2427782-2428969	95748-97100	-	-	-	-
Ge390	10	1829706-1830506	2872162-2873601	-	-	-	-	2842500-2843282	3423-4268	1482409-1484415	1025024-1025443	608759-609925	-	2841643-2842374	-	1153924-1155111	1575510-1576862	-	-	-	-
Ge391	10	1775016-1775816	2888907-2890346	-	-	-	-	2814095-2814877	3550-4394	26054-28060	2328326-2328745	713135-714301	-	2815003-2815734	-	2457495-2458682	118800-120152	-	-	-	-
Ge392	10	1670528-1671328	2848488-2849927	-	-	-	-	2814408-2815190	3554-4399	2671144-2673150	2213628-2214047	608198-609364	-	2813551-2814282	-	2342814-2344001	2764356-2765708	-	-	-	-
Ge393	10	1675471-1676271	2828619-2830058	-	-	-	-	1563496-1564278	3429-4274	2678609-2680615	2221853-2222272	607493-608659	-	1562639-1563370	-	2350410-2351597	2771534-2772886	-	-	-	-
Ge394	10	1775973-1776773	2878735-2880174	-	-	-	-	2869858-2870640	3421-4266	25919-27925	2325828-2326247	713930-715096	-	2870766-2871497	-	2454724-2455911	118973-120325	-	-	-	-
Ge395	10	1688210-1689010	2370692-2372131	-	-	-	-	2053634-2054416	1230387-1231232	821913-823919	168805-169224	845657-846823	-	2054542-2055273	-	2012604-2013791	1419870-1421222	-	-	-	-
Ge396	10	1775834-1776634	2891771-2893210	-	-	-	-	2855044-2855826	3550-4395	26056-28062	2324012-2324431	713551-714717	-	2854187-2854918	-	2453317-2454504	118787-120139	-	-	-	-
Ge397	10	1668448-1669248	2859300-2860739	-	-	-	-	2811217-2811999	3944-4789	2675219-2677225	2217518-2217937	606353-607519	-	2812125-2812856	-	2346664-2347851	2768274-2769626	-	-	-	-
Ge398	10	1704323-1705123	2840056-2841495	-	-	-	-	1592348-1593130	3417-4262	2708420-2710426	2251035-2251454	636332-637498	-	1591491-1592222	-	2379589-2380776	2801347-2802699	-	-	-	-
Ge399	9	1646604-1647404	2816662-2818101	-	-	-	-	2833872-2834654	-	2681765-2683771	2224357-2224776	584802-585968	-	2834780-2835511	-	2353507-2354694	2774816-2776168	-	-	-	-
Ge400	10	1776545-1777345	2862034-2863473	-	-	-	-	2870868-2871650	3554-4399	26068-28074	2328359-2328778	714971-716137	-	2871776-2872507	-	2457615-2458802	119251-120603	-	-	-	-
Ge401	10	1814707-1815507	2828465-2829904	-	-	-	-	2834822-2835604	3423-4268	79897-81903	2364929-2365348	768677-769843	-	2833965-2834696	-	2495789-2496976	173174-174526	-	-	-	-
Ge402	9	1777407-1778207	2779777-2781216	-	-	-	-	2785927-2786709	3554-4399	25407-27413	2327584-2328003	715063-716229	-	2786835-2787566	-	-	118548-119900	-	-	-	-
Ge403	10	1830352-1831152	2895471-2896909	-	-	-	-	2843876-2844658	3421-4266	1481489-1483495	1023913-1024332	606987-608153	-	2843019-2843750	-	1153064-1154251	1574508-1575860	-	-	-	-
Ge404	10	1670917-1671717	2853599-2855038	-	-	-	-	2815728-2816510	3944-4789	2671914-2673920	2214303-2214722	608942-610108	-	2814871-2815602	-	2343486-2344673	2765032-2766384	-	-	-	-
Ge405	8	1715064-1715864	2809147-2810586	-	-	-	-	-	3427-4272	2724555-2726561	2266578-2266997	652466-653632	-	-	-	2395640-2396827	71052-72404	-	-	-	-
Ge406	10	1751884-1752684	2882488-2882574	-	-	-	-	2876614-2877396	3423-4268	2750781-2752787	2293271-2293690	689958-691124	-	2877522-2878253	-	2422506-2423693	94671-96023	-	-	-	-
Ge407	10	1836061-1836861	2854199-2855638	-	-	-	-	2844430-2845212	4071-4916	1483739-1485745	1026465-1026884	609626-610792	-	2843573-2844304	-	1155615-1156802	1576834-1578186	-	-	-	-
Ge408	10	1832959-1833759	2848711-2850150	-	-	-	-	2843126-2843908	3554-4399	26068-28074	1132783-1133202	715732-716898	-	2844034-2844765	-	1262202-1263389	119127-120479	-	-	-	-
Ge409	10	1731603-1732403	2817616-2819045	-	-	-	-	2808401-2809183	3421-4266	2720222-2722228	2261386-2261805	668381-669547	-	2807544-2808275	-	2390541-2391728	75961-77313	-	-	-	-
Ge410	9	1837500-1838300	2808721-2810160	-	-	-	-	2797878-2798660	-	85191-87197	2408781-2409200	774376-775542	-	2798786-2799517	-	2537687-2538874	178296-179648	-	-	-	-
Ge411	10	1826397-1827197	2891941-2893380	-	-	-	-	2865999-2866781	3552-4397	26315-28321	1134116-1134535	715942-717108	-	2866907-2867638	-	1263293-1264480	119507-120859	-	-	-	-
Ge412	8	1668232-1669032	2813083-2814522	-	-	-	-	1563125-1563907	3421-4266	2654879-2656885	2197988-2198407	606581-607747	-	-	-	2326542-2327729	2747749-2749101	-	-	-	-
Ge413	10	1675100-1675900	2863867-2865306	-	-	-	-	2795955-2796737	3413-4258	2709673-2711679	2252276-2252695	607569-608735	-	1562268-1562999	-	2380830-2382017	2802600-2803952	-	-	-	-
Ge414	9	1646967-1647767	2804819-2806258	-	-	-	-	2763196-2763978	-	2680717-2682723	2223175-2223594	584702-585868	-	2795098-2795829	-	2352344-2353531	2773598-2774950	-	-	-	-
Ge415	9	1720483-1721283	2808875-2810314	-	-	-	-	1563739-1564521	-	3662-5668	2299398-2299817	660536-661702	-	2762339-2763070	-	2428558-2429745	79735-81087	-	-	-	-
Ge416	10	1675714-1676514	2857249-2858688	-	-	-	-	1944121-1944903	3427-4272	2677910-2679916	2220783-2221202	607757-608923	-	1562882-1563613	-	2349337-2350524	2770837-2772189	-	-	-	-
HR522	13	1832129-1832929	2812096-2813535	-	2803173-2804081	2801747-2802541	2802634-2803176	1510429-1511211	3435-4280	1525402-1527408	1067541-1067960	650039-651205	-	1945029-1945760	-	1196609-1197796	54532-55884	-	-	-	-
HR523	13	1622459-1623259	2775776-2777215	-	2762473-2763381	2764013-2764807	2763378-2763920	1560743-1561525	3944-4789	2631714-2633720	2173777-2174196	538659-539825	-	1509572-1510303	-	2302453-2303640	2724194-2725546	-	-	-	-
HR524	13	1672717-1673517	2841938-2843377	-	2826402-2827310	2824976-2825770	2825863-2826405	1492541-1493323	15767-16612	2677146-2679152	2223693-2224112	603779-604945	-	1559886-1560617	-	2352369-2353556	2770183-2771535	-	-	-	-
HR525	13	1604515-1605315	2756429-2757868	-	2763480-2763586	2762054-2762848	2762941-2763483	1509567-1510349	4025-4870	2614759-2616765	2157609-2158028	521451-522617	-	1491684-1492415	-	2286285-2287472	2707175-2708527	-	-	-	-
HR526	13	1621541-1622341	2760261-2761700	-	2769825-2770733	2768399-2769193	2769286-2769828	1509883-1510665	3944-4789	2630306-2632312	2172425-2172844	538685-539851	-	1508710-1509441	-	2301173-2302360	2722654-2724006	-	-	-	-
HR527	13	1621857-1622657	2765824-2767263	-	2739808-2740716	2738382-2739176	2739269-2739811	1584058-1584840	3944-4789	2630192-2632198	2172365-2172784	539109-540275	-	1509026-1509757	-	2301041-2302228	2722425-2723777	-	-	-	-
HR528	13	1696032-1696832	2833116-2834555	-	2827124-2828032	2828664-2829458	2828029-2828571	1564550-1565332	3421-4266	2692753-2694759	2235230-2235649	596739-597905	-	1583201-1583932	-	2364162-2365349	2785839-2787191	-	-	-	-
HR529	13	1676524-1677324	2838901-2840340	-	2829018-2829926	2827592-2828386	2828479-2829021	1684045-1684827	3421-4266	2684683-2686689	2227292-2227711	608542-609708	-	1563693-1564424	-	2356226-2357413	2777715-2779067	-	-	-	-
HR530	13	1796019-1796819	2852359-2853798	-	2840625-2841533	2842165-2842959	2841530-2842072	1562064-1562846	3427-4272	38297-40303	2346495-2346914	726532-727698	-	1683188-1683919	-	2475695-2476882	131331-132683	-	-	-	-
HR531	13	1674119-1674919	2814223-2815662	-	2800915-2801823	2802455-2803249	2801820-2802362	1742192-1742974	3433-4278	2684292-2686298	2226538-2226957	609774-610940	-	1561207-1561938	-	2355513-2356700	2777191-2778543	-	-	-	-
HR532	13	1854166-1854966	2845583-2847022	-	2836235-2837143	2837775-2838569	2837140-2837682	1740206-1740988	3427-4272	94442-96448	2405096-2405515	783915-785081	-	1741335-1742066	-	2533953-2535140	187812-189164	-	-	-	-
HR533	13	1852180-1852980	2849921-2851360	-	2833115-2834023	2831689-2832483	2832576-2833118	1566139-1566921	3429-4274	94446-96452	2405097-2405516	782866-784032	-	1739349-1740080	-	2534302-2535489	187478-188830	-	-	-	-
HR534	13	1678113-1678913	2822515-2823954	-	2836451-2837359	2835025-2835819	2835912-2836454	185398-186180	19803-20648	2682167-2684173	2227944-2228363	608900-610066	-	1565282-1566013	-	2357017-2358204	2774861-2776213	-	-	-	-
HU578	13	73422-74222	2000229-2001668	-	2120-3028	3660-4454	3025-3567	1558209-1558991	1483654-1484499	2762625-2764631	1821221-1821640	17251-18417	-	186306-187037	-	1949897-1951084	2855889-2857241	-	-	-	-
IT537	13	1670184-1670984	2846661-2848100	-	2813064-2813972	2814604-2815398	2813969-2814511	1572860-1573642	3423-4268	2660329-2662335	2202833-2203252	609127-610293	-	1557352-1558083	-	2331819-2333006	2753001-2754353	-	-	-	-
IT538	13	1684835-1685635	2834712-2836151	-	2844681-2845589	2843255-2844049	2844142-2844684	2793084-2793866	3944-4789	2691713-2693719	2234368-2234787	608513-609679	-	1572003-1572734	-	2363135-2364322	2784864-2786216	-	-	-	-
IT539	13	1733667-1734467	2779858-2781297	-	2801910-2802818	2800484-2801278	2801371-2801913	1564575-1565357	3421-4266	2732108-2734114	2274911-2275330	661701-662867	-	2792227-2792958	-	2403587-2404774	74106-75458	-	-	-	-
IT540	13	1676806-1677606	2833118-2834557	-	2820448-2821356	2821988-2822782	2821353-2821895	1554768-1555550	3355-4200	2664829-2666835	2207320-2207739	607829-608995	-	1563718-1564449	-	2335996-2337183	2757931-2759283	-	-	-	-
IT542	13	1666743-1667543	2866837-2868276	-	2854331-2855239	2852905-2853699	2853792-2854334	1594559-1595341	3429-4274	2663633-2665639	2205815-2206234	594928-596094	-	1553911-1554642	-	2334749-2335936	2756449-2757801	-	-	-	-
IT543	13	1706534-1707334	2825439-2826878	-	2815960-2816868	2814534-2815328	2815421-2815963	1597721-1598503	3429-4274	2699759-2701765	2241567-2241986	606870-608036	-	1593702-1594433	-	2370563-2371750	2792815-2794167	-	-	-	-
IT544	13	1709696-1710496	2840747-2842186	-	2825240-2826148	2826780-2827574	2826145-2826687	1614768-1615550	3423-4268	2762046-2764052	2308881-2309300	641911-643077	-	1596864-1597595	-	2437880-2439067	95624-96976	-	-	-	-
IT545	12	1727427-1728227	2829636-2831075	-	2833670-2834578	2835210-2836004	2834575-2835117	1723344-1724126	-	2719144-2721150	2261740-2262159	624554-625720	-	1613911-1614642	-	2390416-2391603	2812217-2813569	-	-	-	-
IT547	13	1835319-1836119	2817013-2818452	-	2782420-2783328	2783960-2784754	2783325-2783867	1711242-1712024	3411-4256	82871-84877	2375276-2375695	771694-772860	-	1722487-1723218	-	2503952-2505139	176215-177567	-	-	-	-
IT548	13	1823217-1824017	2782792-2784231	-	2770895-2771803	2769469-2770263	2770356-2770898	1657195-1657977	83143-83988	58646-60652	2362732-2363151	773167-774333	-	1710385-1711116	-	2491408-2492595	175563-176915	-	-	-	-
IT549	13	1769170-1769970	2826429-2827868	-	2812276-2813184	2810862-2811656	2811749-2812279	1623564-1624346	3421-4266	15039-17045	2295019-2295438	704622-705788	-	1656338-1657069	-	2423695-2424882	108023-109375	-	-	-	-
IT550	13	1735539-1736339	2839942-2841381	-	2829289-2830197	2830829-2831623	2830194-2830736	2068351-2069133	19901-20746	2738400-2740406	2285044-2285463	666647-667813	-	1622707-1623438	-	2414226-2415413	71298-72650	-	-	-	-
IT551	12	1956245-1957045	1685399-1686838	-	388244-389152	386818-387612	387705-388247	164457-165239	-	679854-681860	2552613-2553032	1539423-1540589	-	2069259-2069990	-	1170397-1171584	587585-588937	-	-	-	-
IT552	12	276431-277231	1844000-1845439	-	1324038-1324946	1325578-1326372	1324943-1325485	1130144-1130926	-	863798-865804	2028832-2029251	1741424-1742590	-	163600-164331	-	1899388-1900575	2629536-2630888	-	-	-	-
IT553	13	1242119-1242919	1744490-1745929	-	1572190-1573098	1570764-1571558	1571651-1572193	1826408-1827190	7736-8581	1879693-1881699	1404850-1405269	590787-591953	-	1129287-1130018	-	1533582-1534769	1787560-1788912	-	-	-	-
IT554	13	1938617-1939417	2798591-2800030	-	2780220-2781128	2781760-2782554	2781125-2781667	1681857-1682639	3427-4272	115441-117447	2412228-2412647	803865-805031	-	1825551-1826282	-	2541130-2542317	208497-209849	-	-	-	-
IT555	13	1794068-1794868	2827408-2828847	-	2796589-2797497	2798129-2798923	2797494-2798036	1604758-1605540	3417-4262	41438-43444	2353137-2353556	729669-730835	-	1681000-1681731	-	2482235-2483422	134442-135794	-	-	-	-
IT556	13	1716733-1717533	2777829-2779268	-	2769048-2769956	2767622-2768416	2768509-2769051	641870-642652	2747062-2747907	3699-5705	2252131-2252550	664233-665399	-	1603901-1604632	-	2380807-2381994	66947-68299	-	-	-	-
IT557	13	753845-754645	2591227-2592666	-	2262830-2263738	2261416-2262210	2262303-2262833	404611-405393	473647-474492	2715560-2717566	201334-201753	2163969-2165135	-	641013-641744	-	71890-73077	2623145-2624497	-	-	-	-
IT558	13	292618-293418	1895338-1896777	-	1888574-1889482	1890114-1890908	1889479-1890021	2792913-2793695	1042253-1043098	1636523-1638529	2212487-2212906	1509762-1510928	-	405519-406250	-	2082982-2084169	1544151-1545503	-	-	-	-
IT559	13	1670125-1670925	2879323-2880762	-	2826562-2827470	2825136-2825930	2826023-2826565	1569483-1570265	3552-4397	2681016-2683022	2223075-2223494	608001-609167	-	2793821-2794552	-	2352410-2353597	2773862-2775214	-	-	-	-
IT563	11	560667-561467	1754480-1755919	-	602424-603332	600998-601792	601885-602427	1589855-1590637	70749-71594	2617631-2619637	1935935-1936354	1955598-1956764	-	-	-	1806491-1807678	2525013-2526365	-	-	-	-
IT564	13	1681458-1682258	2831983-2833422	-	2835727-2836635	2837267-2838061	2836632-2837174	595660-596442	3421-4266	2691184-2693190	2233254-2233673	607809-608975	-	1568626-1569357	-	2362488-2363675	2783819-2785171	-	-	-	-
IT565	13	1477791-1478591	2161869-2163308	-	2262718-2263626	2261292-2262086	2262179-2262721	1011566-1012348	1765838-1766683	1870976-1872982	2102338-2102757	298830-299996	-	1590763-1591494	-	426227-427414	1963648-1965000	-	-	-	-
IT566	13	483667-484467	2213076-2214515	-	1970017-1970925	1971557-1972351	1970922-1971464	1567050-1567832	1995699-1996544	1561066-1563072	860352-860771	2448822-2449988	-	596568-597299	-	989028-990215	1654239-1655591	-	-	-	-
IT567	13	899537-900337	2719925-2721364	-	1971564-1972472	1973104-1973898	1972469-1973011	1523453-1524235	3425-4270	1832156-1834162	1227168-1227587	2487851-2489017	-	1012474-1013205	-	2637472-2638659	1557806-1559158	-	-	-	-
IT568	13	1679025-1679825	2842106-2843545	-	2835670-2836578	2834244-2835038	2835131-2835673	1656978-1657760	3427-4272	2687310-2689316	2229367-2229786	607454-608620	-	1566193-1566924	-	2358504-2359691	2780030-2781382	-	-	-	-
IT569	10	1635428-1636228	2811933-2813372	-	-	-	-	619400-620182	2444539-2445384	2634554-2636560	2171403-2171822	571076-572242	-	1522596-1523327	-	2299981-2301168	2727519-2728871	-	-	-	-
IT570	12	1769085-1769885	2797898-2799337	-	2804297-2805205	2802871-2803665	2803758-2804300	1724220-1725002	-	15428-17434	2350389-2350808	703113-704279	-	1656121-1656852	-	2479656-2480843	108418-109770	-	-	-	-
IT571	13	507407-508207	2340969-2342408	-	2853200-2854108	2854740-2855534	2854105-2854647	1277599-1278381	915207-916052	1426862-1428868	176836-177255	2227883-2229049	-	620308-621039	-	1009469-1010656	1334531-1335883	-	-	-	-
IT572	11	1770131-1770931	2834695-2836134	-	2838461-2839369	2840001-2840795	2839366-2839908	341062-341844	3433-4278	15314-17320	2334978-2335397	706106-707272	-	-	-	2463926-2465113	98376-99728	-	-	-	-
IT573	14	1836531-1837331	2895345-2896784	-	2871131-2872039	2869705-2870499	2870592-2871134	373692-374474	3429-4274	2844673-2846679	2386600-2387019	736028-737194	-	1723363-1724094	2876075-2876722	2515275-2516462	95856-97208	-	-	-	-
IT574	13	136590-137390	2558812-2560251	-	2161337-2162245	2162877-2163671	2162242-2162784	560411-561193	718078-718923	999524-1001530	535065-535484	2345284-2346450	-	1278507-1279238	-	2651659-2652846	1091746-1093098	-	-	-	-
IT701	13	228775-229575	2695519-2696958	-	2367589-2368497	2366163-2366957	2367050-2367592	1599801-1600583	501616-502461	2260232-2262238	1174135-1174554	525376-526542	-	341970-342701	-	118360-119547	2352893-2354245	-	-	-	-
IT702	14	485668-486468	2790099-2791538	-	2176544-2177452	2178084-2178878	2177449-2177991	2620841-2621623	946752-947597	1838614-1840620	1556000-1556419	2037938-2039104	-	372835-373566	746012-746659	2000070-2001257	1931670-1933022	-	-	-	-
IT703	10	448418-449218	2318334-2319773	-	-	-	-	832139-832921	327328-328173	1163288-1165294	2483026-2483445	2143064-2144230	-	561319-562050	-	2611626-2612813	1256332-1257684	-	-	-	-
IT704	13	1712227-1713027	2885473-2886912	-	2867226-2868134	2868766-2869560	2868131-2868673	1048503-1049285	3433-4278	2706466-2708472	2248505-2248924	641826-642992	-	1598944-1599675	-	2377181-2378368	2799511-2800863	-	-	-	-
IT705	10	2732816-2733616	2384946-2386385	-	-	-	-	527761-528543	1638885-1639730	1330607-1332613	210307-210726	1165866-1167032	-	2619984-2620715	-	80862-82049	2102465-2103817	-	-	-	-
IT707	13	944196-944996	1818064-1819503	-	2711547-2712455	2710121-2710915	2711008-2711550	544809-545591	1034158-1035003	2520400-2522406	2035726-2036145	1548406-1549572	-	831282-832013	-	1906202-1907389	2428124-2429476	-	-	-	-
IT708	13	1160466-1161266	2622641-2624080	-	2609838-2610746	2611378-2612172	2610743-2611285	177096-177878	305246-306091	2384479-2386485	1478591-1479010	1645232-1646398	-	1047646-1048377	-	1607363-1608550	2414781-2416133	-	-	-	-
IT709	13	415768-416568	1619500-1620939	-	1535579-1536487	1537119-1537913	1536484-1537026	1668752-1669534	907728-908573	1003544-1005550	65539-65958	2267997-2269163	-	528669-529400	-	1271501-1272688	1096532-1097884	-	-	-	-
IT710	13	656784-657584	2532540-2533979	-	1733587-1734495	1732161-1732955	1733048-1733590	2840308-2841090	318114-318959	1941055-1943061	1192485-1192904	2159828-2160994	-	543952-544683	-	1063041-1064228	2034139-2035491	-	-	-	-
IT711	13	289071-289871	2595001-2596440	-	2367070-2367978	2365644-2366438	2366531-2367073	2745198-2745980	1763536-1764381	1375018-1377024	675005-675424	2216509-2217675	-	176239-176970	-	803429-804616	1467991-1469343	-	-	-	-
IT712	13	1780727-1781527	2845634-2847073	-	2809078-2809986	2810606-2811400	2809983-2810513	2801609-2802391	3433-4278	27181-29187	2311274-2311693	716566-717732	-	1667895-1668626	-	2439950-2441137	120209-121561	-	-	-	-
La001	10	1076444-1077244	2845489-2846928	-	-	-	-	1669753-1670535	3397-4242	25720-27726	2324447-2324866	710885-712051	-	2839451-2840182	-	2455205-2456392	118525-119877	-	-	-	-
La002	10	980479-981279	2755187-2756626	-	-	-	-	1701549-1702331	3421-4266	2689979-2691985	2230557-2230976	619717-620883	-	2744341-2745072	-	2361491-2362678	95687-97039	-	-	-	-
La003	10	1837192-1837992	2836132-2837571	-	-	-	-	2818794-2819576	3421-4266	1524190-1526196	1066359-1066778	649451-650617	-	2800752-2801483	-	1195593-1196780	54527-55879	-	-	-	-
La004	10	1781848-1782648	2838708-2840147	-	-	-	-	2792748-2793530	26168-27013	2689-4695	2327072-2327491	714318-715484	-	1668896-1669627	-	2457924-2459111	118434-119786	-	-	-	-
La005	13	1813610-1814410	2864196-2865635	-	2858029-2858937	2859569-2860363	2858934-2859476	2800800-2801582	3417-4262	25993-27999	2359675-2360094	717798-718964	-	1700692-1701423	-	2488658-2489845	119035-120387	-	-	-	-
La006	10	1775922-1776722	2846086-2847525	-	-	-	-	2807359-2808141	3427-4272	25983-27989	2318812-2319231	714512-715678	-	2817937-2818668	-	2449690-2450877	119162-120514	-	-	-	-
La008	10	1774154-1774954	2848217-2849656	-	-	-	-	2819042-2819824	3415-4260	25774-27780	2321170-2321589	712940-714106	-	2791891-2792622	-	2452000-2453187	118176-119528	-	-	-	-
La009	10	1775911-1776711	2830019-2831458	-	-	-	-	2813286-2814068	3423-4268	25971-27977	2328133-2328552	714370-715536	-	2799943-2800674	-	2458995-2460182	119117-120469	-	-	-	-
La010	10	1775133-1775933	2843625-2845064	-	-	-	-	2818668-2819450	3423-4268	25971-27977	2318129-2318548	714149-715315	-	2806502-2807233	-	2447292-2448479	119130-120482	-	-	-	-
La011	10	1775732-1776532	2852703-2854142	-	-	-	-	2849193-2849975	3421-4266	25965-27971	2350908-2351327	714933-716099	-	2818185-2818916	-	2481762-2482949	119022-120374	-	-	-	-
La012	10	1774720-1775520	2874265-2875704	-	-	-	-	2849276-2850058	26174-27019	2691-4697	2318428-2318847	713364-714530	-	2812429-2813160	-	2449290-2450477	118525-119877	-	-	-	-
La013	10	1771404-1772204	2827914-2829353	-	-	-	-	2812547-2813329	3415-4260	22539-24545	2314846-2315265	710487-711653	-	2817811-2818542	-	2445676-2446863	115699-117051	-	-	-	-
La014	10	1774788-1775588	2854141-2855580	-	-	-	-	2845929-2846711	3427-4272	25983-27989	2350183-2350602	713591-714757	-	2848336-2849067	-	2481061-2482248	118465-119817	-	-	-	-
La015	10	1665514-1666314	2864003-2865442	-	-	-	-	2819316-2820098	3421-4266	2667188-2669194	2208097-2208516	604317-605483	-	2850184-2850915	-	2338951-2340138	2760244-2761596	-	-	-	-
La016	10	1770932-1771732	2828854-2830293	-	-	-	-	2828125-2828907	26156-27001	2685-4691	2316821-2317240	710051-711217	-	2811690-2812421	-	2447659-2448846	115208-116560	-	-	-	-
La017	10	1826410-1827210	2861117-2862556	-	-	-	-	2787278-2788060	3421-4266	22557-24563	1127431-1127850	710832-711998	-	2845072-2845803	-	1256586-1257773	115833-117185	-	-	-	-
La018	10	1751320-1752120	2847151-2848590	-	-	-	-	2822364-2823146	2761078-2761923	2683-4689	2301363-2301782	690719-691885	-	2818459-2819190	-	2432248-2433435	96064-97416	-	-	-	-
La019	10	1775174-1775974	2859484-2860923	-	-	-	-	2816405-2817187	3427-4272	25983-27989	2320741-2321160	714052-715218	-	2827268-2827999	-	2451619-2452806	119040-120392	-	-	-	-
La020	10	1774128-1774928	2859517-2860956	-	-	-	-	2753494-2754276	3423-4268	22563-24569	2327542-2327961	710610-711776	-	2786421-2787152	-	2458404-2459591	115843-117195	-	-	-	-
La021	10	1775215-1776015	2848077-2849516	-	-	-	-	2750259-2751041	3425-4270	25977-27983	2317230-2317649	714128-715294	-	2821507-2822238	-	2448100-2449287	119158-120510	-	-	-	-
La022	10	1776536-1777336	2809029-2810468	-	-	-	-	2786503-2787285	3427-4272	25983-27989	2320047-2320466	714704-715870	-	2817313-2818044	-	2450925-2452112	118969-120321	-	-	-	-
La023	10	1705393-1706193	2762119-2763558	-	-	-	-	2793705-2794487	3429-4274	25989-27995	2248896-2249315	643237-644403	-	2754402-2755133	-	2378083-2379270	119148-120500	-	-	-	-
La024	10	1704779-1705579	2805861-2807300	-	-	-	-	2817145-2817927	3425-4270	25977-27983	2249239-2249658	643022-644188	-	2749402-2750133	-	2378408-2379595	119033-120385	-	-	-	-
La025	10	1769780-1770580	2864393-2865832	-	-	-	-	2825127-2825909	3411-4256	25934-27940	2322630-2323049	712958-714124	-	2785646-2786377	-	2451743-2452930	118116-119468	-	-	-	-
La026	10	1731487-1732287	2826389-2827645	-	-	-	-	2808783-2809565	2841850-2842338	2761876-2763882	2297990-2298409	669936-671102	-	2792848-2793579	-	2427367-2428554	73121-74473	-	-	-	-
La027	10	1775719-1776519	2838332-2839771	-	-	-	-	2832662-2833444	3421-4266	25965-27971	2320726-2321145	714054-715220	-	2816288-2817019	-	2449623-2450810	118905-120257	-	-	-	-
La028	10	1763715-1764515	2831940-2833379	-	-	-	-	2809124-2809906	3427-4272	14385-16391	2306747-2307166	702359-703525	-	2824270-2825001	-	2435736-2436923	107358-108710	-	-	-	-
La029	10	1752270-1753070	2847087-2848526	-	-	-	-	2817525-2818307	3421-4266	2753519-2755525	2296309-2296728	690842-692008	-	2807926-2808657	-	2425206-2426393	95681-97033	-	-	-	-
La030	10	1772651-1773451	2817094-2818533	-	-	-	-	2832852-2833634	3415-4260	25947-27953	2342291-2342710	711349-712515	-	2831805-2832536	-	2471175-2472362	118932-120284	-	-	-	-
La031	10	1775498-1776298	2821060-2822499	-	-	-	-	2829996-2830778	3423-4268	25971-27977	2319967-2320386	714017-715183	-	2810032-2810763	-	2448868-2450055	118956-120308	-	-	-	-
La032	10	1752575-1753375	2829032-2830471	-	-	-	-	2819723-2820505	3423-4268	2754819-2756825	2297581-2298000	690925-692091	-	2818433-2819164	-	2426482-2427669	95775-97127	-	-	-	-
La033	9	1728794-1729594	2838678-2840117	-	-	-	-	2849449-2850231	-	2729704-2731710	2271888-2272307	667453-668619	-	2833760-2834491	-	2401229-2402416	72225-73577	-	-	-	-
La034	10	1777181-1777981	2879960-2881399	-	-	-	-	1926003-1926785	3421-4266	25965-27971	2328459-2328878	715605-716771	-	2829139-2829870	-	2457356-2458543	119230-120582	-	-	-	-
La035	10	1775590-1776390	2840522-2841961	-	-	-	-	2841407-2842189	3425-4270	25977-27983	2319653-2320072	714238-715404	-	2818866-2819597	-	2448558-2449745	118962-120314	-	-	-	-
La036	10	1775764-1776564	2869194-2870633	-	-	-	-	2815252-2816034	3427-4272	25937-27943	2325550-2325969	714421-715587	-	2848592-2849323	-	2454547-2455734	118922-120274	-	-	-	-
La037	10	1814010-1814810	2851613-2853052	-	-	-	-	2805451-2806233	15849-16694	48414-50420	1149628-1150047	732630-733796	-	1926911-1927642	-	1278626-1279813	140590-141942	-	-	-	-
La038	10	1775613-1776413	2832820-2834259	-	-	-	-	1672914-1673696	3423-4268	25971-27977	2319851-2320270	713790-714956	-	2840550-2841281	-	2448752-2449939	118637-119989	-	-	-	-
La039	10	1775349-1776149	2790224-2791663	-	-	-	-	2808739-2809521	3423-4268	25798-27804	2328909-2329328	714226-715392	-	2814395-2815126	-	2457810-2458997	118873-120225	-	-	-	-
La041	10	1775065-1775865	2848899-2850338	-	-	-	-	2810385-2811167	3417-4262	25953-27959	2321882-2322301	713628-714794	-	2804594-2805325	-	2451020-2452207	118832-120184	-	-	-	-
La042	9	1785013-1785813	2853662-2855101	-	-	-	-	2779346-2780128	-	2693-4699	2308549-2308968	716918-718084	-	1672057-1672788	-	2437658-2438845	95749-97101	-	-	-	-
La043	10	1774904-1775704	2823550-2824989	-	-	-	-	2818822-2819604	3538-4383	26146-28152	2319297-2319716	713535-714701	-	2809647-2810378	-	2448417-2449604	119201-120553	-	-	-	-
La044	9	1726145-1726945	2803774-2805213	-	-	-	-	2808845-2809627	-	2760621-2762627	2303354-2303773	667613-668464	-	2809528-2810259	-	2432268-2433455	72419-73771	-	-	-	-
La045	10	1064293-1065093	2851028-2852467	-	-	-	-	2835532-2836314	3423-4268	17695-19701	2314188-2314607	704395-705561	-	2780254-2780985	-	2445049-2446236	109516-110868	-	-	-	-
La046	10	1776004-1776804	2826634-2828073	-	-	-	-	2804247-2805029	3423-4268	25932-27938	2345234-2345653	713824-714990	-	2819730-2820461	-	2474485-2475672	118988-120340	-	-	-	-
La047	10	1795737-1796537	2860521-2861960	-	-	-	-	2825238-2826020	3540-4385	26033-28039	2319688-2320107	734207-735373	-	2807988-2808719	-	2448818-2450005	119240-120592	-	-	-	-
La048	10	1828970-1829770	2846533-2847972	-	-	-	-	2793059-2793841	3548-4393	26057-28063	1130422-1130841	713602-714768	-	2834675-2835406	-	1259584-1260771	118530-119882	-	-	-	-
La049	10	1826513-1827313	2840019-2841458	-	-	-	-	2816364-2817146	25921-26766	2569-4575	1130040-1130459	713237-714403	-	2803390-2804121	-	1259407-1260594	118406-119758	-	-	-	-
La050	10	1829605-1830405	2830184-2831623	-	-	-	-	2821346-2822128	3550-4395	26063-28069	1130956-1131375	714112-715278	-	2824381-2825112	-	1260126-1261313	119227-120579	-	-	-	-
La051	10	1762586-1763386	2841807-2843246	-	-	-	-	2811455-2812237	3548-4393	14049-16055	2311117-2311536	700520-701686	-	2792202-2792933	-	2440395-2441582	106593-107945	-	-	-	-
La052	10	1761057-1761857	2869416-2870855	-	-	-	-	2822360-2823142	3552-4397	11018-13024	2304436-2304855	698910-700076	-	2817272-2818003	-	2433614-2434801	104074-105426	-	-	-	-
La053	10	1774776-1775576	2832509-2833948	-	-	-	-	2817990-2818772	3544-4389	26045-28051	2318791-2319210	713214-714380	-	2820489-2821220	-	2447937-2449124	118510-119862	-	-	-	-
La054	10	1775263-1776063	2912066-2913505	-	-	-	-	2814087-2814869	3425-4270	25680-27686	2348029-2348448	713177-714343	-	2810598-2811329	-	2477199-2478386	118157-119509	-	-	-	-
La055	10	1776917-1777717	2815010-2816449	-	-	-	-	2819166-2819948	3552-4397	26069-28075	2321109-2321528	714646-715812	-	2821503-2822234	-	2450287-2451474	119125-120477	-	-	-	-
La057	10	1775413-1776213	2867892-2869331	-	-	-	-	2816451-2817233	26197-27042	2577-4583	2319774-2320193	713426-714592	-	2817133-2817864	-	2449104-2450291	118560-119912	-	-	-	-
La058	10	1776648-1777448	2820784-2822223	-	-	-	-	2818717-2819499	3546-4391	26051-28057	2322944-2323363	714845-716011	-	2813230-2813961	-	2452098-2453285	119107-120459	-	-	-	-
La059	10	1827136-1827936	2827322-2828761	-	-	-	-	2830320-2831102	26553-27398	3083-5089	1130941-1131360	714205-715371	-	2820074-2820805	-	1260175-1261362	119030-120382	-	-	-	-
La060	10	1775669-1776469	2841555-2842994	-	-	-	-	2786170-2786952	3548-4393	26057-28063	2320110-2320529	713894-715060	-	2817359-2818090	-	2449272-2450459	119235-120587	-	-	-	-
La061	10	1775678-1776478	2826908-2828347	-	-	-	-	2817667-2818449	3546-4391	26051-28057	2349973-2350392	714463-715629	-	2819625-2820356	-	2479127-2480314	118520-119872	-	-	-	-
La062	10	1670645-1671445	2857464-2858903	-	-	-	-	2810895-2811677	3417-4262	2673814-2675820	2216315-2216734	607972-609138	-	2829463-2830194	-	2345453-2346640	2766793-2768145	-	-	-	-
La063	10	1784233-1785033	2867568-2869007	-	-	-	-	2813590-2814372	3548-4393	14250-16256	2312202-2312621	722082-723248	-	2785313-2786044	-	2441581-2442768	106805-108157	-	-	-	-
La065	11	1758158-1758958	2862217-2863656	3160-3565	-	-	-	2815862-2816644	2764485-2765330	7544-9550	2304669-2305088	695497-696663	-	2816810-2817541	-	2434072-2435259	99708-101060	-	-	-	-
La066	10	1775547-1776347	2842742-2844181	-	-	-	-	2812935-2813717	3546-4391	26051-28057	2319719-2320138	713701-714867	-	2810038-2810769	-	2448873-2450060	119107-120459	-	-	-	-
La067	10	1775106-1775906	2851739-2853178	-	-	-	-	2814177-2814959	3548-4393	26057-28063	2319466-2319885	713189-714355	-	2814498-2815229	-	2448628-2449815	118530-119882	-	-	-	-
La068	10	1778416-1779216	2825896-2827335	-	-	-	-	2839640-2840422	3558-4403	26087-28093	2325232-2325651	715024-716190	-	2815005-2815736	-	2454434-2455621	118580-119932	-	-	-	-
La069	10	1774879-1775679	2824189-2825628	-	-	-	-	2822343-2823125	15496-16341	25805-27811	2326829-2327248	713559-714725	-	2813843-2814574	-	2455983-2457170	118861-120213	-	-	-	-
La070	10	1777065-1777865	2834288-2835727	-	-	-	-	2819666-2820448	3552-4397	26069-28075	2323600-2324019	715440-716606	-	2813320-2814051	-	2452778-2453965	119351-120703	-	-	-	-
La071	10	1766378-1767178	2881683-2883122	-	-	-	-	2844256-2845038	3421-4266	25799-27805	2320081-2320500	714089-715255	-	2838783-2839514	-	2449235-2450422	119106-120458	-	-	-	-
La072	10	1776341-1777141	2868182-2869621	-	-	-	-	2810506-2811288	26179-27024	2571-4577	2322619-2323038	713189-714355	-	2821486-2822217	-	2451781-2452968	118530-119882	-	-	-	-
La073	10	1825490-1826290	2803639-2805078	-	-	-	-	2788506-2789288	2812793-2813638	20922-22928	1125527-1125946	708845-710011	-	2820574-2821305	-	1254822-1256009	114066-115418	-	-	-	-
La074	10	1776935-1777735	2859492-2860931	-	-	-	-	2822485-2823267	3552-4397	25942-27948	2326024-2326443	715033-716199	-	2845164-2845895	-	2455202-2456389	119109-120461	-	-	-	-
La075	10	1775156-1775956	2816811-2818250	-	-	-	-	2846073-2846855	3540-4385	26033-28039	2320127-2320546	713610-714776	-	2811414-2812145	-	2449257-2450444	119089-120441	-	-	-	-
La076	10	1775575-1776375	2826146-2827585	-	-	-	-	2845744-2846526	3552-4397	26069-28075	2307914-2308333	713509-714675	-	2787649-2788380	-	2437092-2438279	118550-119902	-	-	-	-
La077	10	1669518-1670318	2838118-2839557	-	-	-	-	2843132-2843914	4071-4916	2678631-2680637	2221012-2221431	607972-609138	-	2821628-2822359	-	2350166-2351353	2771687-2773039	-	-	-	-
La078	11	1751952-1752752	2871258-2872697	-	-	-	-	2816859-2817641	2783175-2784020	2575-4581	2324600-2325019	689742-690908	-	2845216-2845947	-	2453778-2454965	94979-96331	-	-	-	2862168-2862653
La079	10	1751349-1752149	2858323-2859762	-	-	-	-	2834011-2834793	2799990-2800835	2438-4444	2326410-2326829	689873-691039	-	2846652-2847383	-	2455564-2456751	94975-96327	-	-	-	-
La080	10	1753006-1753806	2888054-2889493	-	-	-	-	2826855-2827637	2839014-2839113	2577-4583	2296418-2296837	690924-692090	-	2842275-2843006	-	2425604-2426791	95736-97088	-	-	-	-
La081	10	1775735-1776535	2848759-2850198	-	-	-	-	2822800-2823582	3552-4397	26069-28075	2321022-2321441	713651-714817	-	2816002-2816733	-	2450418-2451605	117708-119060	-	-	-	-
La082	11	1774495-1775295	2839457-2840896	-	-	-	-	2808085-2808867	9678-10523	2561-4567	2326553-2326972	713182-714348	-	2833154-2833885	-	2455675-2456862	118451-119803	-	-	-	2860491-2860976
La083	10	1752039-1752839	2874812-2876251	-	-	-	-	2812362-2813144	2770815-2771660	2569-4575	2297116-2297535	690442-691608	-	2825998-2826729	-	2426375-2427562	95625-96977	-	-	-	-
La084	10	1775211-1776011	2879453-2880892	-	-	-	-	2819875-2820657	3425-4270	25811-27817	2323688-2324107	713206-714372	-	2821943-2822674	-	2452926-2454113	118991-120343	-	-	-	-
La085	10	1775326-1776126	2834093-2835532	-	-	-	-	2807505-2808287	3550-4395	26063-28069	2318513-2318932	713482-714648	-	2807228-2807959	-	2447728-2448915	118789-120141	-	-	-	-
La086	10	1776547-1777347	2888515-2889954	-	-	-	-	2818304-2819086	3421-4266	25799-27805	2347216-2347635	714872-716038	-	2811505-2812236	-	2476370-2477557	119060-120412	-	-	-	-
La087	10	1775977-1776777	2869884-2871323	-	-	-	-	2826122-2826904	26815-27660	2569-4575	2323103-2323522	714406-715572	-	2819018-2819749	-	2452258-2453445	119227-120579	-	-	-	-
La088	10	1773688-1774488	2831658-2833097	-	-	-	-	2831691-2832473	3554-4399	24386-26392	2317641-2318060	711792-712958	-	2806648-2807379	-	2446827-2448014	116871-118223	-	-	-	-
La089	10	1775258-1776058	2827913-2829352	-	-	-	-	2813698-2814480	26167-27012	2567-4573	2320280-2320699	713565-714731	-	2817447-2818178	-	2449426-2450613	118747-120099	-	-	-	-
La090	10	1765799-1766599	2830499-2831938	-	-	-	-	2816665-2817447	23560-24405	2540-4546	2302944-2303363	704521-705672	-	2825265-2825996	-	2431827-2433014	115563-116915	-	-	-	-
La091	10	1775721-1776521	2821434-2822873	-	-	-	-	2815690-2816472	26821-27666	2571-4577	2321975-2322394	714126-715292	-	2832599-2833330	-	2451136-2452323	119235-120587	-	-	-	-
La092	10	1776638-1777438	2833389-2834828	-	-	-	-	2829857-2830639	3552-4397	26069-28075	2320991-2321410	714141-715307	-	2814606-2815337	-	2450169-2451356	119378-120730	-	-	-	-
La093	10	1750569-1751369	2853902-2855341	-	-	-	-	2813484-2814266	2755745-2756590	2565-4571	2297702-2298121	689305-690471	-	2815808-2816539	-	2426840-2428027	94729-96081	-	-	-	-
La094	10	1670930-1671730	2856533-2857972	-	-	-	-	2814933-2815715	3423-4268	2673251-2675257	2215496-2215915	609226-610392	-	2816598-2817329	-	2344659-2345846	2766388-2767740	-	-	-	-
La095	10	1753830-1754630	2822928-2824367	-	-	-	-	2814018-2814800	3944-4789	2756470-2758476	2298719-2299138	691723-692889	-	2829000-2829731	-	2427897-2429084	96634-97986	-	-	-	-
La096	10	1775558-1776358	2864365-2865804	-	-	-	-	2844797-2845579	3554-4399	26075-28081	2321567-2321986	714069-715235	-	2814392-2815123	-	2450753-2451940	119259-120611	-	-	-	-
La097	10	1775694-1776494	2811144-2812583	-	-	-	-	2848259-2849041	3556-4401	26081-28087	2323173-2323592	714004-715170	-	2814076-2814807	-	2452366-2453553	119137-120489	-	-	-	-
La098	10	1764527-1765327	2858515-2859954	-	-	-	-	2821102-2821884	3552-4397	14168-16174	2310083-2310502	702303-703469	-	2813161-2813892	-	2439262-2440449	107224-108576	-	-	-	-
La099	11	1775269-1776069	2887172-2888611	-	-	-	-	2812815-2813597	9708-10553	2571-4577	2322937-2323356	713915-715081	-	2845705-2846436	-	2452099-2453286	118966-120318	-	-	-	2856474-2856959
La100	10	1776063-1776863	2866321-2867760	-	-	-	-	2834504-2835286	3558-4403	25960-27966	2319047-2319466	714066-715232	-	2847402-2848133	-	2448249-2449436	119148-120500	-	-	-	-
La101	10	1775994-1776794	2817317-2818756	-	-	-	-	2833472-2834254	3552-4397	26069-28075	2321363-2321782	714154-715320	-	2820245-2820976	-	2450542-2451729	119202-120554	-	-	-	-
La102	10	1776247-1777047	2834449-2835888	-	-	-	-	2818991-2819773	3554-4399	26075-28081	2323472-2323891	714229-715395	-	2811958-2812689	-	2452658-2453845	119336-120688	-	-	-	-
La103	10	1775804-1776604	2846292-2847731	-	-	-	-	2817060-2817842	3554-4399	26075-28081	2345389-2345808	713946-715112	-	2833647-2834378	-	2474575-2475762	119131-120483	-	-	-	-
La104	10	1776069-1776869	2838106-2839545	-	-	-	-	2815564-2816346	3558-4403	26087-28093	2321049-2321468	714152-715318	-	2832615-2833346	-	2450251-2451438	119233-120585	-	-	-	-
La105	10	1776057-1776857	2840057-2841496	-	-	-	-	2822554-2823336	3557-4402	26086-28092	2319331-2319750	714325-715491	-	2818134-2818865	-	2448533-2449720	119407-120759	-	-	-	-
La106	10	1775833-1776633	2839629-2841068	-	-	-	-	2811526-2812308	3554-4399	26075-28081	2318675-2319094	713514-714680	-	2816203-2816934	-	2447859-2449046	118560-119912	-	-	-	-
La107	10	1777144-1777944	2832418-2833857	-	-	-	-	2811066-2811848	3554-4399	26075-28081	2330305-2330724	713975-715141	-	2814707-2815438	-	2459218-2460405	118954-120306	-	-	-	-
La109	10	1753700-1754500	2816132-2817571	-	-	-	-	2812891-2813673	3552-4397	2757253-2759259	2299478-2299897	691771-692937	-	2823462-2824193	-	2428657-2429844	96826-98178	-	-	-	-
La110	10	1777530-1778330	2894085-2895524	-	-	-	-	2818009-2818791	9851-10696	2577-4583	2322878-2323297	714739-715905	-	2810669-2811400	-	2452064-2453251	118731-120083	-	-	-	-
La111	10	1669765-1670565	2842957-2844396	-	-	-	-	2849925-2850707	3423-4268	2669819-2671825	2212144-2212563	608168-609334	-	2810209-2810940	-	2341306-2342493	2762873-2764225	-	-	-	-
La112	10	1669595-1670395	2827282-2828721	-	-	-	-	2809756-2810538	50-895	2673404-2675410	2215608-2216027	607997-609163	-	2812034-2812765	-	2344786-2345973	2766460-2767812	-	-	-	-
La113	10	1777140-1777940	2809227-2810666	-	-	-	-	2793547-2794329	3558-4403	26087-28093	2322504-2322923	715396-716562	-	2817152-2817883	-	2451706-2452893	119143-120495	-	-	-	-
La114	10	1763722-1764522	2822061-2823500	-	-	-	-	2817380-2818162	3421-4266	14025-16031	2308929-2309348	702103-703269	-	2850833-2851564	-	2438084-2439271	107201-108553	-	-	-	-
La115	10	1775789-1776589	2840681-2842120	-	-	-	-	2811505-2812287	26896-27741	2577-4583	2321425-2321844	714163-715329	-	2808899-2809630	-	2450611-2451798	119355-120707	-	-	-	-
La116	10	1758476-1759276	2829309-2830748	-	-	-	-	2811264-2812046	3552-4397	9380-11386	2310733-2311152	697413-698579	-	2792690-2793421	-	2439909-2441096	102550-103902	-	-	-	-
La117	10	1670932-1671732	2843879-2845318	-	-	-	-	2820463-2821245	3552-4397	2704385-2706391	2246647-2247066	608794-609960	-	2816523-2817254	-	2375826-2377013	2797637-2798989	-	-	-	-
La118	10	1774928-1775728	2829286-2830725	-	-	-	-	2829009-2829791	3552-4397	26069-28075	2321663-2322082	713304-714470	-	2812413-2813144	-	2450841-2452028	118550-119902	-	-	-	-
La119	10	1776336-1777136	2864806-2866245	-	-	-	-	2810172-2810954	3554-4399	26075-28081	2321289-2321708	713946-715112	-	2810407-2811138	-	2450475-2451662	119131-120483	-	-	-	-
La120	10	1829564-1830364	2812370-2813809	-	-	-	-	2811990-2812772	3548-4393	26057-28063	1130454-1130873	713772-714938	-	2819606-2820337	-	1259616-1260803	119113-120465	-	-	-	-
La121	10	1775495-1776295	2854895-2856334	-	-	-	-	2810622-2811404	3558-4403	26087-28093	2324433-2324852	713694-714860	-	2829917-2830648	-	2453635-2454822	119080-120432	-	-	-	-
La122	10	1775144-1775944	2832388-2833827	-	-	-	-	2818204-2818986	3554-4399	26075-28081	2321144-2321563	713518-714684	-	2811080-2811811	-	2450330-2451517	118802-120154	-	-	-	-
La123	10	1776175-1776975	2851192-2852631	-	-	-	-	2819060-2819842	3554-4399	26075-28081	2319789-2320208	713946-715112	-	2811133-2811864	-	2448973-2450160	119131-120483	-	-	-	-
La124	10	1775246-1776046	2835200-2836639	-	-	-	-	2794228-2795010	26203-27048	2579-4585	2318787-2319206	713479-714645	-	2809765-2810496	-	2447981-2449168	118570-119922	-	-	-	-
La125	10	1670250-1671050	2840393-2841832	-	-	-	-	2810217-2810999	3556-4401	2673483-2675489	2215666-2216085	608231-609397	-	2817347-2818078	-	2344860-2346047	2766643-2767995	-	-	-	-
La126	10	1670557-1671357	2827622-2829061	-	-	-	-	2815052-2815834	3556-4401	2675796-2677802	2217981-2218400	608617-609783	-	2818203-2818934	-	2347176-2348363	2768949-2770301	-	-	-	-
La127	10	1775128-1775928	2831658-2833097	-	-	-	-	2817720-2818502	3556-4401	26081-28087	2330190-2330609	713437-714603	-	2793371-2794102	-	2459384-2460571	118570-119922	-	-	-	-
La128	10	1775706-1776506	2834203-2835642	-	-	-	-	2820552-2821334	3554-4399	26075-28081	2319136-2319555	714069-715235	-	2809360-2810091	-	2448408-2449595	119259-120611	-	-	-	-
La129	10	1777172-1777972	2820488-2821927	-	-	-	-	2815226-2816008	3554-4399	26075-28081	2328351-2328770	715319-716485	-	2814195-2814926	-	2457537-2458724	119153-120505	-	-	-	-
La130	10	1776631-1777431	2813927-2815366	-	-	-	-	2812667-2813449	3560-4405	26093-28099	2321812-2322231	714248-715414	-	2816863-2817594	-	2451022-2452209	119149-120501	-	-	-	-
La131	10	1670395-1671195	2828435-2829874	-	-	-	-	2818592-2819374	3425-4270	2674712-2676718	2216753-2217172	608216-609382	-	2819695-2820426	-	2346036-2347223	2767768-2769120	-	-	-	-
La132	10	1776247-1777047	2847283-2848722	-	-	-	-	2827567-2828349	3554-4399	26075-28081	2327380-2327799	714159-715325	-	2814369-2815100	-	2456566-2457753	119255-120607	-	-	-	-
La134	10	1756708-1757508	2859644-2861083	-	-	-	-	2811832-2812614	3944-4789	2760601-2762607	2302861-2303280	694532-695698	-	2811810-2812541	-	2432064-2433251	99537-100889	-	-	-	-
La135	10	1670817-1671617	2845917-2847356	-	-	-	-	2840473-2841255	3944-4789	2675088-2677094	2217329-2217748	608195-609361	-	2817735-2818466	-	2346523-2347710	2768246-2769598	-	-	-	-
La136	10	1830383-1831183	2820346-2821785	-	-	-	-	2817475-2818257	3552-4397	26069-28075	1130798-1131217	713963-715129	-	2828475-2829206	-	1259976-1261163	119125-120477	-	-	-	-
La137	10	1775658-1776458	2832974-2834413	-	-	-	-	2820294-2821076	3558-4403	26087-28093	2319712-2320131	714061-715227	-	2810975-2811706	-	2449017-2450204	119143-120495	-	-	-	-
La138	10	1775834-1776634	2869046-2870485	-	-	-	-	2812721-2813503	3556-4401	26081-28087	2322146-2322565	714201-715367	-	2839616-2840347	-	2451341-2452528	119337-120689	-	-	-	-
La139	10	1776047-1776847	2843492-2844931	-	-	-	-	2826693-2827475	3556-4401	26081-28087	2322615-2323034	714068-715234	-	2816618-2817349	-	2451810-2452997	119147-120499	-	-	-	-
La140	10	1775999-1776799	2805900-2807339	-	-	-	-	2825324-2826106	3554-4399	26075-28081	2319866-2320285	714183-715349	-	2819437-2820168	-	2449052-2450239	119131-120483	-	-	-	-
La141	10	1775727-1776527	2815853-2817292	-	-	-	-	2813273-2814055	3556-4401	26081-28087	2321264-2321683	713968-715134	-	2813629-2814360	-	2450458-2451645	119137-120489	-	-	-	-
La142	10	1776441-1777241	2831643-2833082	-	-	-	-	2833774-2834556	3554-4399	26075-28081	2321756-2322175	714290-715456	-	2825836-2826567	-	2450942-2452129	119336-120688	-	-	-	-
La143	10	1672125-1672925	2810581-2812020	-	-	-	-	2831461-2832243	15884-16729	2674923-2676929	2216999-2217418	609680-610846	-	2826232-2826963	-	2346161-2347348	2768112-2769464	-	-	-	-
La144	10	1764208-1765008	2849504-2850943	-	-	-	-	2815588-2816370	3552-4397	14262-16268	2313031-2313450	702217-703383	-	2812416-2813147	-	2442169-2443356	107397-108749	-	-	-	-
La145	10	1776269-1777069	2862938-2864377	-	-	-	-	2799926-2800708	26851-27696	2581-4587	2322018-2322437	714193-715359	-	2832917-2833648	-	2451220-2452407	119275-120627	-	-	-	-
La146	10	1775680-1776480	2834591-2836030	-	-	-	-	2830405-2831187	3554-4399	26075-28081	2344503-2344922	714007-715173	-	2832369-2833100	-	2473689-2474876	119131-120483	-	-	-	-
La147	10	1669918-1670718	2820538-2821977	-	-	-	-	2815611-2816393	3554-4399	2671398-2673404	2213654-2214073	608180-609346	-	2814731-2815462	-	2342840-2344027	2764454-2765806	-	-	-	-
La148	10	1765368-1766168	2856783-2858222	-	-	-	-	2819561-2820343	3554-4399	14268-16274	2309998-2310417	703473-704639	-	2799069-2799800	-	2439144-2440331	107324-108676	-	-	-	-
La150	10	1775623-1776423	2835432-2836871	-	-	-	-	2815487-2816269	3554-4399	26075-28081	2320034-2320453	713950-715116	-	2831313-2832044	-	2449220-2450407	119135-120487	-	-	-	-
La151	10	1669974-1670774	2855852-2857291	-	-	-	-	2811737-2812519	3944-4789	2677038-2679044	2219289-2219708	608267-609433	-	2814754-2815485	-	2348475-2349662	2770094-2771446	-	-	-	-
La152	10	1670448-1671248	2810990-2812429	-	-	-	-	2807540-2808322	3552-4397	2678728-2680734	2221210-2221629	608121-609287	-	2820469-2821200	-	2350388-2351575	2771784-2773136	-	-	-	-
La153	10	1776146-1776946	2835624-2837063	-	-	-	-	2822705-2823487	26851-27696	2581-4587	2326288-2326707	714237-715403	-	2814630-2815361	-	2455490-2456677	119275-120627	-	-	-	-
La154	11	1858063-1858863	2830244-2831683	-	-	-	-	2823722-2824504	108304-109149	84094-86100	2403669-2404088	795995-797161	2811335-2811611	2829579-2830038	-	2532851-2534038	201369-202721	-	-	-	-
La155	10	1775965-1776765	2829955-2831394	-	-	-	-	2815099-2815881	3552-4397	26069-28075	2319254-2319673	714045-715211	-	2806683-2807414	-	2448432-2449619	119125-120477	-	-	-	-
La156	10	1775078-1775878	2904085-2905524	-	-	-	-	2843930-2844712	3421-4266	25799-27805	2320904-2321323	713659-714825	-	2821848-2822579	-	2450058-2451245	118975-120327	-	-	-	-
La157	10	1802007-1802807	2883697-2885136	-	-	-	-	2814771-2815553	3421-4266	52703-54709	2349429-2349848	740489-741655	-	2822865-2823596	-	2478584-2479771	145797-147149	-	-	-	-
La158	10	1777007-1777807	2829497-2830936	-	-	-	-	2846104-2846886	3552-4397	26069-28075	2324027-2324446	715344-716510	-	2814242-2814973	-	2453205-2454392	119125-120477	-	-	-	-
La159	11	1773355-1774155	2858509-2859948	-	-	-	-	2813667-2814449	3552-4397	26608-28614	2321396-2321815	711487-712653	-	2843073-2843804	-	2450574-2451761	116534-117886	-	-	-	2862832-2863317
La160	10	1776291-1777091	2823880-2825319	-	-	-	-	2810781-2811563	3558-4403	26087-28093	2321776-2322195	714255-715421	-	2815679-2816410	-	2450978-2452165	119217-120569	-	-	-	-
La161	10	1670776-1671576	2841997-2843436	-	-	-	-	2815061-2815843	3944-4789	2690413-2692419	2232716-2233135	608488-609654	-	2845247-2845978	-	2361900-2363087	2783417-2784769	-	-	-	-
La162	10	1775836-1776636	2816797-2818236	-	-	-	-	2811237-2812019	26455-27300	2577-4583	2319037-2319456	714074-715240	-	2814575-2815306	-	2448223-2449410	119259-120611	-	-	-	-
La163	10	1747170-1747970	2856006-2857445	-	-	-	-	2814149-2814931	15884-16729	2747454-2749460	2289719-2290138	684589-685755	-	2809924-2810655	-	2418880-2420067	89324-90676	-	-	-	-
La164	10	1775780-1776580	2836776-2838215	-	-	-	-	2814768-2815550	3554-4399	26075-28081	2321054-2321473	713507-714673	-	2814204-2814935	-	2450240-2451427	118603-119955	-	-	-	-
La165	10	1777469-1778269	2826022-2827461	-	-	-	-	2833656-2834438	3558-4403	26087-28093	2322897-2323316	715436-716602	-	2810380-2811111	-	2452100-2453287	119241-120593	-	-	-	-
La166	10	1830370-1831170	2824669-2826108	-	-	-	-	2820287-2821069	3554-4399	26075-28081	1131160-1131579	714083-715249	-	2813292-2814023	-	1260346-1261533	119210-120562	-	-	-	-
La167	10	1764581-1765381	2808152-2809591	-	-	-	-	2854316-2855098	3554-4399	14268-16274	2310101-2310520	702134-703300	-	2813911-2814642	-	2439247-2440434	107324-108676	-	-	-	-
La168	10	1833057-1833857	2839448-2840887	-	-	-	-	2808759-2809541	3552-4397	26069-28075	1130099-1130518	713924-715090	-	2832799-2833530	-	1259277-1260464	119125-120477	-	-	-	-
La169	10	1775865-1776665	2855486-2856925	-	-	-	-	2826336-2827118	3554-4399	26077-28083	2323784-2324203	714030-715196	-	2819430-2820161	-	2452970-2454157	119133-120485	-	-	-	-
La170	11	1765274-1766074	2830153-2831592	-	-	-	-	2812552-2813334	9869-10714	2583-4589	2310401-2310820	703227-704393	-	2853459-2854190	-	2439611-2440798	107066-108418	-	-	-	2850511-2850996
La171	10	1830410-1831210	2837506-2838945	-	-	-	-	2852725-2853507	3558-4403	1483641-1485647	1025801-1026220	608462-609628	-	2807902-2808633	-	1155003-1156190	1576784-1578136	-	-	-	-
La172	10	1828402-1829202	2820370-2821809	-	-	-	-	2809542-2810324	3554-4399	1482750-1484756	1025051-1025470	608279-609445	-	2825479-2826210	-	1154237-1155424	1575668-1577020	-	-	-	-
La173	10	1756156-1756956	2818957-2820396	-	-	-	-	2814242-2815024	15878-16723	2760075-2762081	2302348-2302767	694158-695324	-	2813460-2814191	-	2431484-2432671	99402-100754	-	-	-	-
La174	10	1672103-1672903	2858414-2859853	-	-	-	-	2830551-2831333	3560-4405	2726481-2728487	2268635-2269054	609912-611078	-	2853633-2854364	-	2397846-2399033	2819414-2820766	-	-	-	-
La175	10	1752822-1753622	2861917-2863356	-	-	-	-	2842292-2843074	3423-4268	2753863-2755869	2296413-2296832	691212-692378	-	2808685-2809416	-	2425453-2426640	96455-97807	-	-	-	-
La176	10	1774113-1774913	2841999-2843438	-	-	-	-	2813091-2813873	3920-4765	2756368-2758374	2298503-2298922	712056-713222	-	2813385-2814116	-	2427689-2428876	96802-98154	-	-	-	-
La177	10	1670928-1671728	2841303-2842742	-	-	-	-	2811775-2812557	3556-4401	2672709-2674715	2215351-2215770	608512-609678	-	2829694-2830425	-	2344422-2345609	2765765-2767117	-	-	-	-
La178	10	1775427-1776227	2815555-2816994	-	-	-	-	2816030-2816812	3554-4399	25950-27956	2326498-2326917	713455-714621	-	2843200-2843931	-	2455684-2456871	118558-119910	-	-	-	-
La179	10	1773014-1773814	2849377-2850816	-	-	-	-	2814890-2815672	23782-24627	2577-4583	2318998-2319417	711102-712268	-	2812234-2812965	-	2448266-2449453	116202-117554	-	-	-	-
La180	11	1752480-1753280	2855267-2856706	-	-	-	-	2816289-2817071	2739463-2740308	2577-4583	2281083-2281502	690209-691375	-	2810918-2811649	-	2410147-2411334	95394-96746	-	-	-	2818231-2818716
La181	10	1775691-1776491	2839501-2840940	-	-	-	-	2818251-2819033	26072-26917	2579-4585	2319314-2319733	713727-714893	-	2816938-2817669	-	2448386-2449573	118439-119791	-	-	-	-
La182	10	1829635-1830435	2779074-2780513	-	-	-	-	2842146-2842928	3546-4391	25797-27803	1130019-1130438	713353-714519	-	2814033-2814764	-	1259173-1260360	118510-119862	-	-	-	-
La183	10	1776047-1776847	2809202-2810641	-	-	-	-	2818756-2819538	3528-4373	26045-28051	2320969-2321388	713864-715030	-	2817197-2817928	-	2450146-2451333	119101-120453	-	-	-	-
La184	10	1752960-1753760	2825929-2827368	-	-	-	-	2806800-2807582	18971-19816	2784959-2786965	2321288-2321707	691507-692673	-	2817394-2818125	-	2450722-2451909	96746-98098	-	-	-	-
La185	11	1752937-1753737	2879195-2880634	-	-	-	-	2843099-2843881	2761397-2762242	2583-4589	2302957-2303376	691228-692394	-	2841289-2842020	-	2432233-2433420	95562-96914	-	-	-	2830041-2830526
La186	10	1775431-1776231	2843753-2845192	-	-	-	-	2810448-2811230	26197-27042	2577-4583	2320873-2321292	713397-714563	-	2817899-2818630	-	2449937-2451124	118560-119912	-	-	-	-
La187	10	1768542-1769342	2873559-2874998	-	-	-	-	2736210-2736992	3552-4397	19042-21048	2316489-2316908	707003-708169	-	2805943-2806674	-	2445667-2446854	112137-113489	-	-	-	-
La188	11	1784824-1785624	2882840-2884279	-	-	-	-	2815482-2816264	19559-20404	2792684-2794690	2335141-2335560	722845-724011	-	2842242-2842973	-	2464303-2465490	128199-129551	-	-	-	2874568-2875053
La189	10	1776597-1777397	2857038-2858477	-	-	-	-	1677964-1678746	26833-27678	2575-4581	2320608-2321027	714170-715336	-	2809591-2810322	-	2449664-2450851	119251-120603	-	-	-	-
La190	10	1680512-1681312	2794534-2795973	-	-	-	-	2854318-2855100	2683990-2684835	2573-4579	2225679-2226098	618762-619928	-	2735353-2736084	-	2354980-2356167	95348-96700	-	-	-	-
La191	10	1754125-1754925	2821032-2822471	-	-	-	-	2821879-2822661	3944-4789	2784899-2786905	2327200-2327619	691744-692910	-	2814625-2815356	-	2456386-2457573	96822-98174	-	-	-	-
La192	11	1789990-1790790	2881726-2883165	-	-	-	-	2816724-2817506	2773842-2774687	45602-47608	2346917-2347336	729333-730499	-	1677107-1677838	-	2475848-2477035	134884-136236	-	-	-	2828623-2829108
La193	11	1777522-1778322	2865095-2866534	-	-	-	-	2816622-2817404	3558-4403	25960-27966	2324444-2324863	713654-714820	-	2855226-2855957	-	2453644-2454831	118416-119768	-	-	-	2859445-2859930
La194	10	1828965-1829765	2833262-2834701	-	-	-	-	2844169-2844951	3413-4258	1481838-1483844	1024299-1024718	607745-608911	-	2821022-2821753	-	1153421-1154608	1574773-1576125	-	-	-	-
La195	10	1670758-1671558	2805858-2807297	-	-	-	-	2816414-2817196	3944-4789	2700974-2702980	2243125-2243544	608389-609555	-	2815867-2816598	-	2372327-2373514	2794030-2795382	-	-	-	-
La196	10	1776047-1776847	2837435-2838874	-	-	-	-	2834619-2835401	3552-4397	26071-28077	2348958-2349377	714002-715168	-	2817530-2818261	-	2478136-2479323	119239-120591	-	-	-	-
La197	10	1809708-1810508	2857305-2858744	-	-	-	-	2807449-2808231	-	2676-4682	1107412-1107831	690630-691796	-	2843312-2844043	-	1236588-1237775	95611-96963	-	-	-	2849378-2849863
La198	10	1833424-1834224	2867976-2869415	-	-	-	-	2815741-2816523	3944-4789	1566576-1568582	1108832-1109251	691999-693165	-	2817322-2818053	-	1238034-1239221	96909-98261	-	-	-	-
La199	11	1752518-1753318	2871349-2872788	-	-	-	-	2817029-2817811	2760052-2760897	2565-4571	2301924-2302343	690538-691704	-	2833762-2834493	-	2431060-2432247	95422-96774	-	-	-	2854491-2854976
La200	10	1766778-1767578	2819261-2820700	-	-	-	-	2808198-2808980	3383-4228	25560-27566	2199974-2200393	712175-713341	-	2806592-2807323	-	2328915-2330102	117793-119145	-	-	-	-
La201	10	1754046-1754846	2822746-2824185	-	-	-	-	2854128-2854910	4071-4916	2759099-2761105	2301387-2301806	692078-693244	-	2814884-2815615	-	2430539-2431726	96794-98146	-	-	-	-
La203	10	1256258-1257058	2822096-2823535	-	-	-	-	2853086-2853868	4071-4916	209421-211427	2506418-2506837	896995-898161	-	2817937-2818668	-	2635556-2636743	302477-303829	-	-	-	-
La204	10	1828729-1829529	2842620-2844059	-	-	-	-	2830272-2831054	26455-27300	2577-4583	1130897-1131316	714119-715285	-	2807341-2808072	-	1260153-1261340	119261-120613	-	-	-	-
La205	11	1752928-1753728	2901877-2903316	-	-	-	-	1654278-1655060	2758258-2759103	2577-4583	2299885-2300304	690561-691727	-	2853271-2854002	-	2429069-2430256	95429-96781	-	-	-	2844086-2844571
La206	11	1795829-1796629	2826198-2827637	-	-	-	-	2834829-2835611	2767187-2768032	45471-47477	2339541-2339960	733622-734788	-	2852229-2852960	-	2468685-2469872	138594-139946	-	-	-	2858351-2858836
La207	10	1756096-1756896	2838793-2840232	-	-	-	-	2780945-2781727	3944-4789	2758490-2760496	2300802-2301221	693897-695063	-	2829415-2830146	-	2430001-2431188	99384-100736	-	-	-	-
La208	10	1766253-1767053	2829444-2830883	-	-	-	-	2817869-2818651	2591022-2591867	2695-4701	2324757-2325176	691091-692257	-	1653421-1654152	-	2453664-2454851	95979-97331	-	-	-	-
La209	10	1774074-1774874	2840588-2842027	-	-	-	-	2807114-2807896	3552-4397	24380-26386	2317700-2318119	712255-713421	-	2833972-2834703	-	2446878-2448065	117499-118851	-	-	-	-
La210	9	1729857-1730657	2793407-2794846	-	-	-	-	2810958-2811740	-	2731727-2733733	2272369-2272788	667546-668712	-	2780088-2780819	-	2403219-2404406	72208-73560	-	-	-	-
La211	10	1753055-1753855	2880681-2882120	-	-	-	-	2836212-2836994	3429-4274	2759289-2761295	2301703-2302122	691460-692626	-	2818777-2819508	-	2430884-2432071	95416-96768	-	-	-	-
La212	10	1775929-1776729	2831100-2832539	-	-	-	-	1670724-1671506	3421-4266	25965-27971	2323183-2323602	714638-715804	-	2806257-2806988	-	2452080-2453267	118363-119715	-	-	-	-
La213	10	1776106-1776906	2843842-2845281	-	-	-	-	2787136-2787918	3548-4393	26177-28183	2348915-2349334	714501-715667	-	2811866-2812597	-	2478076-2479263	119438-120790	-	-	-	-
La214	10	1773479-1774279	2876639-2878078	-	-	-	-	2826543-2827325	23771-24616	2695-4701	2348481-2348900	712375-713541	-	2835355-2836086	-	2477797-2478984	116303-117655	-	-	-	-
La215	10	1782771-1783571	2812820-2814259	-	-	-	-	2808235-2809017	3431-4276	25989-27995	2327444-2327863	714241-715407	-	1669867-1670598	-	2456001-2457188	119023-120375	-	-	-	-
La216	9	1833649-1834449	2799215-2800654	-	-	-	-	2801891-2802673	-	87869-89875	2405441-2405860	775685-776851	-	2788044-2788775	-	2534341-2535528	179876-181228	-	-	-	-
La217	10	1776100-1776900	2818493-2819932	-	-	-	-	2816374-2817156	3554-4399	26195-28201	2327782-2328201	714412-715578	-	2825686-2826417	-	2456968-2458155	119363-120715	-	-	-	-
La218	10	1774749-1775549	2842573-2844012	-	-	-	-	2805969-2806751	3558-4403	24398-26404	2319844-2320263	712532-713698	-	2807378-2808109	-	2449046-2450233	117534-118886	-	-	-	-
La219	10	1657079-1657879	2885691-2887130	-	-	-	-	2842661-2843443	3427-4272	2660984-2662990	2201645-2202064	596047-597213	-	2801034-2801765	-	2332521-2333708	2753992-2755344	-	-	-	-
La220	10	1779342-1780142	2860448-2861887	-	-	-	-	2809603-2810385	3431-4276	9387-11393	2329364-2329783	716624-717793	-	2815517-2816248	-	2460257-2461444	100214-101566	-	-	-	-
La221	10	1762980-1763780	2826529-2827968	-	-	-	-	2837032-2837814	3421-4266	14297-16303	2307738-2308157	701586-702752	-	2806877-2807608	-	2438592-2439779	106766-108118	-	-	-	-
La222	10	1778623-1779423	2863575-2865014	-	-	-	-	2810987-2811769	3425-4270	25977-27983	2329081-2329500	716803-717969	-	2841804-2842535	-	2457924-2459111	118872-120224	-	-	-	-
La223	10	1772551-1773351	2818096-2819535	-	-	-	-	2813340-2814122	3546-4391	24359-26365	2318245-2318664	710517-711683	-	2808746-2809477	-	2447399-2448586	117454-118806	-	-	-	-
La225	10	1775245-1776045	2843562-2845001	-	-	-	-	2822121-2822903	26179-27024	2571-4577	2324790-2325209	713520-714686	-	2836175-2836906	-	2453952-2455139	118625-119977	-	-	-	-
La227	10	1776999-1777799	2822601-2824040	-	-	-	-	2792255-2792871	3554-4399	26075-28081	2321010-2321429	715147-716313	-	2810130-2810861	-	2450196-2451383	119135-120487	-	-	-	-
La228	10	1671033-1671833	2828452-2829891	-	-	-	-	2833838-2834002	4071-4916	2674136-2676142	2216591-2217010	610905-612071	-	2812483-2813214	-	2345753-2346940	2767344-2768696	-	-	-	-
La229	10	1775923-1776723	2875170-2876609	-	-	-	-	2866964-2867208	3548-4393	26057-28063	2321399-2321818	713843-715009	-	2823029-2823760	-	2450561-2451748	119113-120465	-	-	-	-
La231	10	1776374-1777174	2863674-2865113	-	-	-	-	2871327-2871571	3423-4268	25971-27977	2330230-2330649	714522-715688	-	2832981-2833712	-	2459131-2460318	119249-120601	-	-	-	-
La232	10	1780820-1781620	2865662-2867101	-	-	-	-	1668676-1669458	26168-27013	2689-4695	2326457-2326876	713340-714506	-	1667819-1668550	-	2457311-2458498	118540-119892	-	-	-	-
La233	13	1764811-1765611	2842819-2844258	-	2833654-2834562	2832228-2833022	2833115-2833657	1652578-1653360	26219-27064	2733-4739	2322062-2322481	701623-702789	-	1651721-1652452	-	2451229-2452416	110437-111789	-	-	-	-
La234	10	1774386-1775186	2846477-2847916	-	-	-	-	2795075-2795857	3546-4391	25797-27803	2320572-2320991	712873-714039	-	2795983-2796714	-	2449726-2450913	118266-119618	-	-	-	-
La235	10	1775972-1776772	2843078-2844517	-	-	-	-	2833040-2833822	3558-4403	26087-28093	2325940-2326359	714126-715292	-	2832183-2832914	-	2455142-2456329	119143-120495	-	-	-	-
La236	10	1777335-1778135	2814701-2816140	-	-	-	-	2827102-2827884	3554-4399	26075-28081	2323899-2324318	714755-715921	-	2828010-2828741	-	2453085-2454272	119212-120564	-	-	-	-
La237	10	1671802-1672602	2809235-2810674	-	-	-	-	2817998-2818780	3944-4789	2674075-2676081	2216240-2216659	609638-610804	-	2817141-2817872	-	2345442-2346629	2767224-2768576	-	-	-	-
La238	10	1773506-1774306	2832311-2833750	-	-	-	-	2816672-2817454	3439-4284	25995-28001	2316734-2317153	711291-712457	-	2815815-2816546	-	2445643-2446830	116110-117462	-	-	-	-
La239	10	1776878-1777678	2825995-2827434	-	-	-	-	2811375-2812157	26076-26921	2581-4587	2322925-2323344	714947-716113	-	2810518-2811249	-	2452214-2453401	118447-119799	-	-	-	-
La240	10	1775616-1776416	2846374-2847813	-	-	-	-	2821076-2821858	3554-4399	26075-28081	2319471-2319890	713946-715112	-	2820219-2820950	-	2448776-2449963	119131-120483	-	-	-	-
La241	10	1776745-1777545	2832731-2834170	-	-	-	-	2808838-2809620	3554-4399	26075-28081	2320808-2321227	713557-714723	-	2807981-2808712	-	2449994-2451181	118617-119969	-	-	-	-
La242	10	1776185-1776985	2836176-2837615	-	-	-	-	2818921-2819703	3554-4399	26075-28081	2319977-2320396	714053-715219	-	2819829-2820560	-	2449163-2450350	119131-120483	-	-	-	-
La243	10	1776755-1777555	2857625-2859064	-	-	-	-	2815730-2816512	3554-4399	26075-28081	2322439-2322858	714786-715952	-	2814873-2815604	-	2451695-2452882	119222-120574	-	-	-	-
La244	10	1775026-1775826	2863323-2864762	-	-	-	-	2812738-2813520	3546-4391	26051-28057	2321768-2322187	713714-714880	-	2811881-2812612	-	2450922-2452109	119107-120459	-	-	-	-
La246	10	1776057-1776857	2843180-2844619	-	-	-	-	2809521-2810303	3548-4393	26057-28063	2319621-2320040	714210-715376	-	2810429-2811160	-	2448783-2449970	118579-119931	-	-	-	-
La248	10	1746850-1747650	2814122-2815561	-	-	-	-	2809172-2809954	3554-4399	26075-28081	2318863-2319282	685119-686285	-	2808315-2809046	-	2448142-2449329	119131-120483	-	-	-	-
La249	10	1762312-1763112	2865645-2867084	-	-	-	-	2828158-2828940	3558-4403	26087-28093	2329842-2330261	700518-701684	-	2827301-2828032	-	2459123-2460310	119256-120608	-	-	-	-
La250	10	1752613-1753413	2869662-2871101	-	-	-	-	2808965-2809747	4071-4916	2754763-2756769	2297214-2297633	690898-692064	-	2808108-2808839	-	2426368-2427555	96291-97643	-	-	-	-
La251	10	1765418-1766218	2863420-2864859	-	-	-	-	2852375-2853157	3399-4244	25606-27612	2316545-2316964	710150-711316	-	2851518-2852249	-	2445550-2446737	117994-119346	-	-	-	-
La252	10	1776058-1776858	2819643-2821082	-	-	-	-	2813614-2814396	26191-27036	2575-4581	2322158-2322577	713880-715046	-	2812757-2813488	-	2451377-2452564	118735-120087	-	-	-	-
La253	10	1711756-1712556	2859980-2861419	-	-	-	-	2793476-2794258	3421-4266	2723143-2725149	2265375-2265794	649946-651112	-	2792619-2793350	-	2394742-2395929	55171-56523	-	-	-	-
La254	10	1775247-1776047	2827998-2829437	-	-	-	-	2809569-2810351	3540-4385	26033-28039	2324921-2325340	713767-714933	-	2810477-2811208	-	2454051-2455238	119089-120441	-	-	-	-
La255	10	1775348-1776148	2820218-2821657	-	-	-	-	2828596-2829378	3552-4397	26069-28075	2318982-2319401	713937-715103	-	2827739-2828470	-	2448214-2449401	119125-120477	-	-	-	-
La256	10	1829272-1830072	2836427-2837866	-	-	-	-	2792699-2793481	3554-4399	26075-28081	1130667-1131086	713729-714895	-	2791842-2792573	-	1260082-1261269	119131-120483	-	-	-	-
La257	10	1831353-1832153	2853134-2854573	-	-	-	-	2817928-2818710	3552-4397	26069-28075	1130756-1131175	714014-715180	-	2817071-2817802	-	1259934-1261121	119251-120603	-	-	-	-
La258	10	1775330-1776130	2819726-2821165	-	-	-	-	2808532-2809314	3542-4387	26039-28045	2319012-2319431	713678-714844	-	2807675-2808406	-	2448150-2449337	119124-120476	-	-	-	-
La259	10	1834264-1835064	2838858-2840297	-	-	-	-	2810876-2811658	3419-4264	1523792-1525798	1066330-1066749	649693-650859	-	2810019-2810750	-	1195476-1196663	55138-56490	-	-	-	-
La260	10	1829239-1830039	2840229-2841668	-	-	-	-	2810775-2811557	3413-4258	25902-27908	1129892-1130311	713335-714501	-	2809918-2810649	-	1259037-1260224	118893-120245	-	-	-	-
La261	10	1776244-1777044	2845838-2847277	-	-	-	-	2819412-2820194	3554-4399	26075-28081	2320289-2320708	714410-715576	-	2818555-2819286	-	2449475-2450662	119224-120576	-	-	-	-
La262	10	1776688-1777488	2842556-2843995	-	-	-	-	2819082-2819864	26833-27678	2575-4581	2321241-2321660	714775-715941	-	2819990-2820721	-	2450419-2451606	119336-120688	-	-	-	-
La264	10	1776030-1776830	2823721-2825160	-	-	-	-	2815799-2816581	3554-4399	26075-28081	2318557-2318976	714203-715369	-	2816707-2817438	-	2447743-2448930	119388-120740	-	-	-	-
La265	10	1776161-1776961	2815643-2817082	-	-	-	-	2827349-2828131	3552-4397	26069-28075	2320170-2320589	714136-715302	-	2826492-2827223	-	2449348-2450535	119127-120479	-	-	-	-
La266	10	1775188-1775988	2846009-2847448	-	-	-	-	2812785-2813567	26815-27660	2569-4575	2320619-2321038	713652-714818	-	2813693-2814424	-	2449773-2450960	119227-120579	-	-	-	-
La267	10	1830506-1831306	2857203-2858642	-	-	-	-	2829558-2830340	3552-4397	26069-28075	1130676-1131095	713934-715100	-	2828701-2829432	-	1259854-1261041	119125-120477	-	-	-	-
La268	10	1775106-1775906	2844821-2846260	-	-	-	-	2826097-2826879	26179-27024	2571-4577	2319515-2319934	713117-714283	-	2825240-2825971	-	2448677-2449864	118614-119966	-	-	-	-
La269	10	1771348-1772148	2851698-2853137	-	-	-	-	2788037-2788819	3399-4244	25606-27612	2323045-2323464	710436-711602	-	2787180-2787911	-	2452050-2453237	118031-119383	-	-	-	-
La270	10	1775523-1776323	2817260-2818699	-	-	-	-	2790535-2791317	26035-26880	2565-4571	2329155-2329574	714154-715320	-	2791443-2792174	-	2458420-2459607	118374-119726	-	-	-	-
La271	10	1775761-1776561	2818295-2819734	-	-	-	-	2778277-2779059	3554-4399	26075-28081	2319741-2320160	713946-715112	-	2779185-2779916	-	2448927-2450114	119131-120483	-	-	-	-
La272	10	1775531-1776331	2814656-2816095	-	-	-	-	2808450-2809232	3550-4395	26063-28069	2324240-2324659	713384-714550	-	2807593-2808324	-	2453410-2454597	118601-119953	-	-	-	-
La273	10	1775419-1776219	2844373-2845812	-	-	-	-	2815779-2816561	3548-4393	26057-28063	2319194-2319613	713761-714927	-	2814922-2815653	-	2448356-2449543	119113-120465	-	-	-	-
La274	10	1775633-1776433	2841200-2842639	-	-	-	-	2810085-2810867	3554-4399	26075-28081	2318603-2319022	714014-715180	-	2810993-2811724	-	2447789-2448976	119204-120556	-	-	-	-
La275	10	1776436-1777236	2869419-2870858	-	-	-	-	2818539-2819321	26197-27042	2577-4583	2320899-2321318	714486-715652	-	2817682-2818413	-	2450085-2451272	118699-120051	-	-	-	-
La276	10	1795296-1796096	2865230-2866669	-	-	-	-	2849556-2850338	3546-4391	25797-27803	2317716-2318135	733767-734933	-	2850464-2851195	-	2446870-2448057	118853-120205	-	-	-	-
La277	10	1752339-1753139	2824625-2826064	-	-	-	-	2814212-2814994	19490-20335	2753749-2755755	2290366-2290785	692923-694089	-	2813355-2814086	-	2419544-2420731	96479-97831	-	-	-	-
La278	10	1830347-1831147	2807154-2808593	-	-	-	-	2811494-2812276	3552-4397	26069-28075	1131208-1131627	714141-715307	-	2810637-2811368	-	1260386-1261573	119200-120552	-	-	-	-
La279	10	1775441-1776241	2834040-2835479	-	-	-	-	2811352-2812134	3552-4397	26069-28075	2318880-2319299	713888-715054	-	2812260-2812991	-	2448380-2449567	119125-120477	-	-	-	-
La280	10	1829511-1830311	2854964-2856403	-	-	-	-	2819615-2820397	3556-4401	26081-28087	1130657-1131076	713808-714974	-	2820523-2821254	-	1259851-1261038	119319-120671	-	-	-	-
PL510	13	1788511-1789311	2827008-2828447	-	2819876-2820784	2821416-2822210	2820781-2821323	1676308-1677090	11668-12513	24866-26872	2318608-2319027	719410-720576	-	1675451-1676182	-	2447553-2448740	117902-119254	-	-	-	-
PL511	13	1806023-1806823	2837551-2838990	-	2823359-2824267	2824899-2825693	2824264-2824806	1693808-1694590	3433-4278	16643-18649	2345815-2346234	705619-706785	-	1692951-1693682	-	2474772-2475959	109821-111173	-	-	-	-
PL512	13	1785141-1785941	2826180-2827619	-	2833939-2834847	2832513-2833307	2833400-2833942	1673166-1673948	3944-4789	2789656-2791662	2331230-2331649	691587-692753	-	1672309-1673040	-	2460180-2461367	96270-97622	-	-	-	-
PL562	12	1846389-1847189	2801827-2803266	-	2809833-2810741	2808407-2809201	2809294-2809836	1734412-1735194	-	87802-89808	2395169-2395588	777514-778680	-	1733555-1734286	-	2524682-2525869	180858-182210	-	-	-	-
SE501	13	1868807-1869607	2847700-2849139	-	2840470-2841378	2839044-2839838	2839931-2840473	1756779-1757561	15417-16262	111232-113238	2418623-2419042	799407-800573	-	1755922-1756653	-	2547615-2548802	204264-205616	-	-	-	-
SE502	13	1758801-1759601	2851268-2852707	-	2835979-2836887	2834553-2835347	2835440-2835982	1646827-1647609	3425-4270	2766711-2768717	2308496-2308915	690551-691717	-	1645970-1646701	-	2437471-2438658	95736-97088	-	-	-	-
SE503	13	1767261-1768061	2825002-2826441	-	2841882-2842790	2843422-2844216	2842787-2843329	1655287-1656069	15787-16632	2776464-2778470	2319208-2319627	684310-685476	-	1654430-1655161	-	2447884-2449071	89166-90518	-	-	-	-
SE504	13	1768077-1768877	2836621-2838060	-	2810039-2810947	2811579-2812373	2810944-2811486	1656103-1656885	3554-4399	2774713-2776719	2317390-2317809	685090-686256	-	1655246-1655977	-	2446066-2447253	89185-90537	-	-	-	-
SE505	13	1867440-1868240	2839499-2840938	-	2821466-2822374	2823006-2823800	2822371-2822913	1755466-1756248	3433-4278	111193-113199	2417852-2418271	799299-800465	-	1754609-1755340	-	2546749-2547936	204031-205383	-	-	-	-
SE506	13	1868372-1869172	2821552-2822991	-	2839401-2840309	2840941-2841735	2840306-2840848	1756398-1757180	3433-4278	111117-113123	2418393-2418812	799201-800367	-	1755541-1756272	-	2547290-2548477	203834-205186	-	-	-	-
SE507	13	1862831-1863631	2840873-2842312	-	2834736-2835644	2836276-2837070	2835641-2836183	1750857-1751639	3429-4274	110171-112177	2417857-2418276	793761-794927	-	1750000-1750731	-	2546744-2547931	203057-204409	-	-	-	-
SE508	13	1749023-1749823	2848988-2850427	-	2830374-2831282	2831914-2832708	2831279-2831821	1637049-1637831	3433-4278	2757758-2759764	2299468-2299887	679427-680593	-	1636192-1636923	-	2428422-2429609	83939-85291	-	-	-	-
SE561	13	1867122-1867922	2847626-2849065	-	2829539-2830447	2831079-2831873	2830444-2830986	1755148-1755930	3415-4260	110929-112935	2415473-2415892	798479-799645	-	1754291-1755022	-	2544456-2545643	203874-205226	-	-	-	-
SI576	13	1867226-1868026	2831006-2832445	-	2842315-2843223	2840889-2841683	2841776-2842318	1755252-1756034	3425-4270	110935-112941	2418928-2419347	798577-799743	-	1754395-1755126	-	2547809-2548996	203916-205268	-	-	-	-
SI577	13	296689-297489	1773510-1774949	-	1261264-1262172	1259838-1260632	1260725-1261267	184713-185495	2073088-2073933	1103243-1105249	2808693-2809112	1876351-1877517	-	183856-184587	-	1496030-1497217	1317732-1319084	-	-	-	-
Vd457	11	1754287-1755087	2903314-2904753	-	-	-	-	2864024-2864806	3421-4266	2758128-2760134	2300508-2300927	692417-693583	-	2863167-2863898	-	2429663-2430850	95706-97058	-	-	-	2830144-2830629
Vd458	10	1670134-1670934	2829064-2830503	-	-	-	-	2812298-2813080	11737-12582	2670754-2672760	2212878-2213297	607905-609071	-	2811441-2812172	-	2342173-2343360	2763681-2765033	-	-	-	-
Vd459	10	1829626-1830426	2861459-2862898	-	-	-	-	2856515-2857297	3423-4268	1482287-1484293	1024452-1024871	607675-608841	-	2855658-2856389	-	1153612-1154799	1575461-1576813	-	-	-	-
Vd460	10	1670872-1671672	2812639-2814078	-	-	-	-	2831558-2832340	3546-4391	2700209-2702215	2242497-2242916	609141-610307	-	2830701-2831432	-	2371782-2372969	2793255-2794607	-	-	-	-
Vd461	10	1747992-1748792	2816438-2817877	-	-	-	-	2806708-2807490	3439-4284	2749074-2751080	2291702-2292121	686337-687503	-	2807616-2808347	-	2420611-2421798	91106-92458	-	-	-	-
Vd462	10	1668714-1669514	2844166-2845605	-	-	-	-	2839013-2839795	4071-4916	2704681-2706687	2246957-2247376	607374-608540	-	2839921-2840652	-	2376087-2377274	2797446-2798632	-	-	-	-
Vd463	10	1670428-1671228	2835429-2836868	-	-	-	-	2823025-2823807	3554-4399	2672124-2674130	2214340-2214759	608410-609576	-	2823933-2824664	-	2343526-2344713	2765184-2766536	-	-	-	-
Vd464	10	1670620-1671420	2846533-2847972	-	-	-	-	2829217-2829999	3421-4266	2700316-2702322	2242578-2242997	609141-610307	-	2830125-2830856	-	2371863-2373050	2793463-2794815	-	-	-	-
Vd465	10	1670006-1670806	2816580-2818019	-	-	-	-	2823304-2824086	3944-4789	2705095-2707101	2247307-2247726	608195-609361	-	2824212-2824943	-	2376501-2377688	2798151-2799503	-	-	-	-
Vd466	14	1799620-1800420	2858269-2859708	-	2848656-2849564	2847230-2848024	2848117-2848659	1681886-1682668	3427-4272	2794752-2796758	2337244-2337663	679453-680619	-	1681029-1681760	-	2466434-2467621	85327-86679	-	-	1499856-1501775	-
Vd467	10	1672140-1672940	2822921-2824360	-	-	-	-	2815204-2815986	3554-4399	2702288-2704294	2244318-2244737	609510-610676	-	2814347-2815078	-	2373703-2374890	2795455-2796807	-	-	-	-
Vd468	10	1669739-1670539	2847559-2848998	-	-	-	-	2835675-2836457	3421-4266	2672257-2674263	2214767-2215186	607922-609088	-	2836583-2837314	-	2343921-2345108	2765360-2766712	-	-	-	-
Vd469	10	1755161-1755961	2838473-2839912	-	-	-	-	2813940-2814722	4071-4916	2754898-2756904	2297115-2297534	693665-694831	-	2813083-2813814	-	2426277-2427464	96358-97710	-	-	-	-
Vd470	10	1753086-1753886	2843586-2845025	-	-	-	-	2821657-2822439	3944-4789	2755105-2757111	2297093-2297512	691460-692626	-	2822565-2823296	-	2426279-2427466	96427-97779	-	-	-	-
Vd471	10	1825861-1826661	2811881-2813320	-	-	-	-	2850699-2851481	5885-6730	1483486-1485492	1025621-1026040	608746-609912	-	2851607-2852338	-	1154807-1155994	1576662-1578014	-	-	-	-
Vd472	10	1803448-1804248	2831596-2833035	-	-	-	-	2812490-2813272	3552-4397	53786-55792	2351963-2352382	741459-742625	-	2811633-2812364	-	2481140-2482327	146572-147924	-	-	-	-
Vd473	11	1775541-1776341	2896744-2898183	-	-	-	-	2827468-2828250	3425-4270	25775-27781	2317958-2318377	713544-714710	-	2826611-2827342	-	2446839-2448026	118513-119865	-	-	-	2864353-2864838
Vd474	9	1804526-1805326	2856787-2858226	-	-	-	-	2819377-2820159	-	1458526-1460532	1000756-1001175	584091-585257	-	2818520-2819251	-	1129910-1131097	1551582-1552934	-	-	-	-
Vd475	10	1671400-1672200	2868726-2870165	-	-	-	-	2829252-2830034	3550-4395	2673243-2675249	2215389-2215808	609402-610568	-	2830160-2830891	-	2344436-2345623	2766412-2767764	-	-	-	-
Vd476	10	1664615-1665415	2846883-2848322	-	-	-	-	2837792-2838574	4071-4916	2671338-2673344	2213938-2214357	608267-609433	-	2838700-2839431	-	2342830-2344017	2764398-2765750	-	-	-	-
Vd477	10	1672731-1673531	2841892-2843331	-	-	-	-	2850312-2851094	3944-4789	2709040-2711046	2251141-2251560	609567-610733	-	2851220-2851951	-	2380319-2381506	2802158-2803510	-	-	-	-
Vd478	10	1669004-1669804	2849112-2850551	-	-	-	-	2853838-2854620	3421-4266	2675842-2677848	2218153-2218572	607498-608664	-	2852981-2853712	-	2347308-2348495	2768989-2770341	-	-	-	-
Vd479	11	1776540-1777340	2864001-2865440	-	-	-	-	2859464-2860246	3560-4405	25966-27972	2329069-2329488	714736-715902	-	2860372-2861103	-	2457992-2459179	119196-120548	-	-	-	2844076-2844561
Vd480	10	1670109-1670909	2849623-2851062	-	-	-	-	2813413-2814195	4071-4916	2677026-2679032	2219447-2219866	608438-609604	-	2812556-2813287	-	2348602-2349789	2770082-2771434	-	-	-	-
Vd481	10	1670495-1671295	2856391-2857830	-	-	-	-	2808461-2809243	3552-4397	2670380-2672386	2212627-2213046	608333-609499	-	2807604-2808335	-	2341805-2342992	2763316-2764668	-	-	-	-

## Sheet: Card_Resistome_Abricate
Isolate_ID	NUM_FOUND	aac(6')-Ie-aph(2'')-Ia	ant(4')-Ib	ant(9)-Ia	aph(3’)-IIIa	erm(33)	ermA	fosB3	blaZ	sat4	aad(6)	arlR	arlS	cat	dfrC	dfrF	mecA	mecR1	mepA	mepR	mgrA	norA	qacA	sav1866	tet(38)	tet(K)	tet(L)	tetM
AT513	18	2884156-2885596	-	-	2866159-2866954	-	1663970-1664702	2351232-2351511	3427-4273	2867046-2867589	2867585-2868416	1401237-1401897	1399885-1401241	-	-	-	15022-17029	17129-18103	342652-344007	342126-342546	699206-699650	707948-709077	9733-11277	1898967-1900704	107807-109159	-	-	-
AT514	18	2824846-2826286	-	-	2840583-2841378	-	1565057-1565789	2259529-2259808	3431-4277	2841470-2842013	2842009-2842840	1302394-1303054	1301042-1302398	-	-	-	2714439-2716446	2716546-2717520	241238-242593	240712-241132	601249-601693	609603-610732	9737-11281	1799583-1801320	2807495-2808847	-	-	-
AT515	18	2817794-2819234	-	-	2826147-2826942	-	1564891-1565623	2228103-2228382	3427-4273	2827034-2827577	2827573-2828406	1301992-1302652	1300640-1301996	-	-	-	2682911-2684918	2685018-2685992	241209-242564	240683-241103	600558-601002	608904-610033	9733-11277	1799255-1800992	2775969-2777321	-	-	-
AT516	18	2826036-2827476	-	-	2821973-2822768	-	1595212-1595944	2243794-2244073	3429-4275	2821338-2821881	2820511-2821342	1332301-1332961	1330949-1332305	-	-	-	2698539-2700546	2700646-2701620	242554-243909	242028-242448	599257-599701	607607-608736	9735-11279	1823339-1825076	2791594-2792946	-	-	-
AT517	18	2796839-2798279	-	-	2815766-2816561	-	1629966-1630698	2231937-2232216	3425-4271	2816653-2817196	2817192-2818023	1330846-1331506	1329494-1330850	-	-	-	2688799-2690806	2690906-2691880	241583-242938	241057-241477	595217-595661	603561-604690	9731-11275	1849961-1851698	2781933-2783285	-	-	-
AT518	18	2842213-2843653	-	-	2827034-2827829	-	1571770-1572502	2234497-2234776	2796480-2797326	2827921-2828464	2828460-2829291	1309115-1309775	1307763-1309119	-	-	-	2689472-2691479	2691579-2692553	217932-219287	217406-217826	577085-577529	585435-586564	2802786-2804330	1806023-1807760	2782528-2783880	-	-	-
AT520	18	2846231-2847671	-	-	2833063-2833858	-	1574310-1575042	2237215-2237494	2799292-2800138	2833950-2834493	2834489-2835322	1311399-1312059	1310047-1311403	-	-	-	2692256-2694263	2694363-2695337	217931-219286	217405-217825	578175-578619	586525-587654	2805598-2807142	1775769-1777506	2785340-2786692	-	-	-
BE601	18	2774912-2776352	-	-	1998759-1999554	-	1621937-1622669	630879-631158	793917-794763	1998124-1998667	1997297-1998128	2209025-2209685	2209681-2211037	-	-	-	1973943-1975950	1972869-1973843	843896-845251	845357-845777	53577-54021	2630146-2631275	786913-788457	2522183-2523920	1881815-1883167	-	-	-
BE602	18	2850929-2852369	-	-	2827099-2827894	-	1671182-1671914	2334189-2334468	3419-4265	2826464-2827007	2825637-2826468	1408510-1409170	1407158-1408514	-	-	-	25926-27933	28033-29007	348448-349803	347922-348342	707132-707576	715463-716592	9725-11269	1905460-1907197	118845-120197	-	-	-
BE603	17	2832944-2834384	-	-	2822997-2823792	-	-	2400984-2401263	3429-4275	2823884-2824427	2824423-2825254	1482035-1482695	1480683-1482039	-	-	-	101788-103795	103895-104869	422405-423760	421879-422299	780546-780990	788898-790027	9735-11279	1972666-1974403	193950-195302	-	-	-
BE604	18	2413727-2415167	-	-	1408600-1409395	-	2593478-2594210	104674-104953	277554-278400	1409487-1410030	1410026-1410857	2126221-2126881	2126877-2128233	-	-	-	1219965-1221972	1218891-1219865	1644227-1645582	1645688-1646108	336017-336461	1862449-1863578	270550-272094	419090-420827	1127363-1128715	-	-	-
BE605	18	2666513-2667953	-	-	2564174-2564969	-	2303343-2304075	600696-600975	18950-19796	2565061-2565604	2565600-2566431	930638-931298	929286-930642	-	-	-	1554976-1556983	1553902-1554876	2617655-2619010	2619116-2619536	1892386-1892830	1605081-1606210	11946-13490	2710033-2711770	2082848-2084200	-	-	-
BE606	18	2839385-2840825	-	-	2847651-2848446	-	1746877-1747609	2409726-2410005	101938-102784	2848538-2849081	2849077-2849908	1483953-1484613	1482601-1483957	-	-	-	78571-80578	80678-81652	423094-424449	422568-422988	782084-782528	790862-791991	108244-109788	1981399-1983136	194614-195966	-	-	-
BE607	21	2865851-2867291	435-1196	-	2877768-2878563	-	1651942-1652674	2347936-2348215	2806026-2806872	2878655-2879198	2879194-2880025	1390105-1390765	1388753-1390109	-	2864620-2865106	-	8262-10269	10369-11343	329665-331020	329139-329559	688213-688657	696573-697702	2812332-2813876	1886972-1888709	101056-102408	-	1503-2879	-
BE608	18	2694700-2696140	-	-	2302167-2302962	-	382869-383601	1505662-1505941	1284084-1284930	2303054-2303597	2303593-2304424	1683094-1683754	1683750-1685106	-	-	-	2587156-2589163	2589263-2590237	2372952-2374307	2374413-2374833	2500184-2500628	2807986-2809115	1290390-1291934	1971895-1973632	2680213-2681565	-	-	-
BE609	18	2416729-2418169	-	-	830440-831235	-	2133936-2134668	1067331-1067610	3427-4273	829805-830348	828978-829809	1734639-1735299	1733287-1734643	-	-	-	1475254-1477261	1474180-1475154	2524365-2525720	2525826-2526246	1172185-1172629	556389-557518	9733-11277	2580095-2581832	1383057-1384409	-	-	-
BE610	18	2832438-2833878	-	-	2843831-2844626	-	1670632-1671364	2333337-2333616	26106-26952	2843196-2843739	2842369-2843200	1407878-1408538	1406526-1407882	-	-	-	2736-4743	4843-5817	347300-348655	346774-347194	706189-706633	714959-716088	32412-33956	1905147-1906884	118844-120196	-	-	-
BE611	18	2845042-2846482	-	-	2836014-2836809	-	1748302-1749034	2410906-2411185	103672-104518	2835379-2835922	2834552-2835383	1486098-1486758	1484746-1486102	-	-	-	78571-80578	80678-81652	424513-425868	423987-424407	784347-784791	792707-793836	109978-111522	1982668-1984405	194839-196191	-	-	-
BG560	20	2260618-2262058	-	-	2273117-2273912	-	1634124-1634856	492188-492467	694487-695333	2272482-2273025	2271655-2272486	370462-371122	369110-370466	2435397-2436045	-	-	2072578-2074585	2071504-2072478	2382628-2383983	2384089-2384509	810775-811219	2043001-2044130	687483-689027	1455750-1457487	1815419-1816771	2431942-2433322	-	-
CZ575	18	2843614-2845054	-	-	2829496-2830291	-	1572745-1573477	2243082-2243361	3429-4275	2830383-2830926	2830922-2831753	1310108-1310768	1308756-1310112	-	-	-	2700694-2702701	2702801-2703775	242313-243668	241787-242207	600523-600967	608875-610004	9735-11279	1807325-1809062	2793872-2795224	-	-	-
DE509	18	2821053-2822493	-	-	2807724-2808519	-	1739163-1739895	2401563-2401842	3944-4790	2808611-2809154	2809150-2809981	1475129-1475789	1473777-1475133	-	-	-	82097-84104	84204-85178	403217-404572	402691-403111	743312-743756	751660-752789	10250-11794	1973116-1974853	175168-176520	-	-	-
DE801	18	2731385-2732825	-	-	2720587-2721382	-	2697866-2698598	2276850-2277129	19428-20274	2721474-2722017	2722013-2722844	1401573-1402233	1400221-1401577	-	-	-	55894-57901	58001-58975	305189-306544	304663-305083	663896-664340	672240-673369	2450-3994	1892447-1894184	148855-150207	-	-	-
DE802	15	2769965-2771405	-	-	-	-	339431-340163	2642443-2642722	201505-202351	-	-	1905322-1905982	1903970-1905326	-	-	-	2069512-2071519	2068438-2069412	1449542-1450897	1451003-1451423	2354231-2354675	1132691-1133820	207811-209355	1395960-1397697	1977206-1978558	-	-	-
DE803	16	2835563-2837003	-	-	-	-	1585215-1585947	2210732-2211011	3433-4279	-	-	1322410-1323070	1321058-1322414	2810761-2811409	-	-	2667890-2669897	2669997-2670971	241336-242691	240810-241230	599683-600127	608043-609172	9739-11283	1806750-1808487	2760707-2762059	-	-	-
DE804	14	2794933-2796373	-	-	-	-	1605337-1606069	2267851-2268130	2540743-2541589	-	-	1343881-1344541	1342529-1343885	-	-	-	2730706-2732713	2732813-2733787	293005-294360	292479-292899	651702-652146	660051-661180	-	1861097-1862834	64202-65554	-	-	-
DE805	18	2847641-2849081	-	-	2841794-2842589	-	1606730-1607462	2264301-2264580	3429-4275	2842681-2843224	2843220-2844051	1341001-1341661	1339649-1341005	-	-	-	2722204-2724211	2724311-2725285	241353-242708	240827-241247	601279-601723	609631-610760	9735-11279	1838239-1839976	2808808-2810160	-	-	-
DE806	18	2889000-2890440	-	-	2880867-2881662	-	1970982-1971714	1067466-1067745	3429-4275	2880232-2880775	2879405-2880236	2233739-2234399	2234395-2235751	-	-	-	1525104-1527111	1527211-1528185	284654-286009	284128-284548	636304-636748	644655-645784	9735-11279	1750264-1752001	1618083-1619435	-	-	-
DE807	18	2245843-2247283	-	-	2255920-2256715	-	2430004-2430736	2090855-2091134	3421-4267	2255285-2255828	2254458-2255289	409703-410363	408358-409707	-	-	-	1612964-1614971	1611890-1612864	614759-616114	614233-614653	1059392-1059836	1801568-1802697	9727-11271	1162171-1163908	849241-850593	-	-	-
DE808	18	2269894-2271334	-	-	2089307-2090102	-	1065624-1066356	1887587-1887866	840085-840931	2088672-2089215	2087845-2088676	2760270-2760930	2758925-2760274	-	-	-	2263884-2265891	2262810-2263784	1315058-1316413	1316519-1316939	860281-860725	2225482-2226611	846391-847935	2371132-2372869	382985-384337	-	-	-
DE809	18	2442876-2444316	-	-	1134370-1135165	-	309053-309785	889730-890009	802809-803655	1133735-1134278	1132908-1133739	1485465-1486125	1484113-1485469	-	-	-	1810489-1812496	1809415-1810389	2079656-2081011	2081117-2081537	1612624-1613068	2176100-2177229	809115-810659	1594177-1595914	1718266-1719618	-	-	-
DE810	16	2465969-2467409	-	-	1945700-1946495	-	355949-356681	2357548-2357827	-	1946587-1947130	1947126-1947957	2509014-2509674	2507669-2509018	-	-	-	1230772-1232779	1232879-1233853	2642398-2643753	2641872-2642292	2775053-2775497	948974-950103	-	1564392-1566129	756661-758013	-	-	-
DE811	18	2244703-2246143	-	-	522664-523459	-	1717800-1718532	1364429-1364708	35907-36753	522029-522572	521202-522033	872728-873388	873384-874733	-	-	-	2222170-2224177	2224277-2225251	1958090-1959445	1959551-1959971	273963-274407	2250029-2251158	58880-60424	107700-109437	2470263-2471615	-	-	-
DE812	18	1846690-1848130	-	-	2567457-2568252	-	293154-293886	2429616-2429895	537263-538109	2566822-2567365	2565995-2566826	1319050-1319710	1317705-1319054	-	-	-	1657062-1659069	1655988-1656962	2617149-2618504	2618610-2619030	1012936-1013380	1966592-1967721	543569-545113	2722950-2724687	1564836-1566188	-	-	-
DE813	18	2791909-2793349	-	-	2768080-2768875	-	1660017-1660749	2275862-2276141	4071-4917	2768967-2769510	2769506-2770337	1397579-1398239	1396227-1397583	-	-	-	2733254-2735261	2735361-2736335	318431-319786	317905-318325	656029-656473	664356-665485	10377-11921	1913384-1915121	89373-90725	-	-	-
DE814	18	2628712-2630152	-	-	1678480-1679275	-	427888-428620	1490934-1491213	3949-4795	1677845-1678388	1677018-1677849	1956462-1957122	1955110-1956466	-	-	-	2269344-2271351	2268270-2269244	227637-228992	229098-229518	1145934-1146378	898526-899655	10255-11799	2620341-2622078	2177083-2178435	-	-	-
DE815	18	2660841-2662281	-	-	2326371-2327166	-	165351-166083	1041857-1042136	1346491-1347337	2325736-2326279	2324909-2325740	1542055-1542715	1542711-1544060	-	-	-	2128033-2130040	2126959-2127933	1885803-1887158	1887264-1887684	2042209-2042653	1706306-1707435	1339487-1341031	1136407-1138144	2402223-2403575	-	-	-
DE816	18	1927163-1928603	-	-	1494060-1494855	-	2402723-2403455	1324641-1324920	60825-61671	1493425-1493968	1492598-1493429	1559486-1560146	1560142-1561498	-	-	-	610002-612009	612109-613083	2168329-2169684	2169790-2170210	1066332-1066776	2631990-2633119	67131-68675	1167275-1169012	1051313-1052665	-	-	-
DE817	18	2436454-2437894	-	-	1957270-1958065	-	757132-757864	356361-356640	1407880-1408726	1958157-1958700	1958696-1959527	2438757-2439417	2439413-2440769	-	-	-	2397946-2399953	2400053-2401027	2146104-2147459	2145578-2145998	1330792-1331236	2089492-2090621	1414186-1415730	1265222-1266959	1795812-1797164	-	-	-
DE818	18	2834414-2835854	-	-	2829461-2830256	-	1329500-1330232	1992697-1992976	19815-20661	2830348-2830891	2830887-2831718	1066623-1067283	1065271-1066627	-	-	-	2446311-2448318	2448418-2449392	2767481-2768836	2766955-2767375	334269-334713	342595-343724	2361-3905	1563625-1565362	2539441-2540793	-	-	-
DE819	18	2842895-2844335	-	-	2838243-2839038	-	1647675-1648407	2312461-2312740	19780-20626	2839130-2839673	2839669-2840500	1384474-1385134	1383122-1384478	-	-	-	2770147-2772154	2772254-2773228	324566-325921	324040-324460	682738-683182	691086-692215	2326-3870	1882323-1884060	96388-97740	-	-	-
DE820	18	2798086-2799526	-	-	2781711-2782506	-	1676815-1677547	2216394-2216673	3427-4273	2782598-2783141	2783137-2783968	1413571-1414231	1412219-1413575	-	-	-	2673971-2675978	2676078-2677052	241463-242818	240937-241357	594691-595135	603038-604167	9733-11277	1089773-1091510	2767116-2768468	-	-	-
DE821	18	2095622-2097062	-	-	2082303-2083098	-	530977-531709	2686037-2686316	23508-24354	2081668-2082211	2080841-2081672	833540-834200	834196-835545	-	-	-	1853001-1855008	1851927-1852901	2317613-2318968	2319074-2319494	2029934-2030378	15528-16657	29814-31358	1115050-1116787	248845-250197	-	-	-
DE822	18	2834457-2835897	-	-	2841849-2842644	-	1687098-1687830	2349672-2349951	4071-4917	2841214-2841757	2840387-2841218	1424168-1424826	1422816-1424172	-	-	-	2807143-2809150	2809250-2810224	325135-326490	324609-325029	683364-683808	691960-693089	10377-11921	1921861-1923598	96349-97701	-	-	-
DE823	18	1223661-1225101	-	-	308980-309775	-	1750665-1751397	498547-498826	47941-48787	308345-308888	307518-308349	2698574-2699234	2699230-2700586	-	-	-	1411549-1413556	1413656-1414630	1580768-1582123	1580242-1580662	862889-863333	2193313-2194442	40937-42481	2382924-2384661	1504326-1505678	-	-	-
DE824	18	2830507-2831947	-	-	2823632-2824427	-	1657995-1658727	2321427-2321706	3429-4275	2824519-2825062	2825058-2825889	1394677-1395337	1393332-1394681	-	-	-	27051-29058	29158-30132	348570-349925	348044-348464	707295-707739	715906-717035	9735-11279	1893055-1894792	119292-120644	-	-	-
DE825	18	2536688-2538128	-	-	2396696-2397491	-	633275-634007	1971814-1972093	1631029-1631875	2396061-2396604	2395234-2396065	773173-773833	773829-775178	-	-	-	201991-203998	200917-201891	1123066-1124421	1122540-1122960	1649884-1650328	2138478-2139607	1624025-1625569	2839652-2841389	2382522-2383874	-	-	-
DE826	17	2783699-2785139	-	-	2773423-2774218	-	1925119-1925851	1023916-1024195	-	2772788-2773331	2771961-2772792	2187764-2188424	2188420-2189776	-	-	-	1480984-1482991	1483091-1484065	242099-243454	241573-241993	599556-600000	607903-609032	10665-12209	1704701-1706438	1573948-1575300	-	-	-
DE827	19	798668-800108	-	-	1336438-1337233	-	2307168-2307900	284502-284781	19009-19855	1335803-1336346	1334976-1335807	1957772-1958432	1956420-1957776	430381-431029	-	-	1478047-1480054	1476973-1477947	912643-913998	912117-912537	437900-438344	26703-27832	12005-13549	857477-859214	1385787-1387139	-	-	-
DE828	16	2818607-2820047	-	-	2801764-2802559	-	1541486-1542218	2204447-2204726	-	2802651-2803194	2803190-2804021	1278775-1279435	1277423-1278779	-	-	-	2661855-2663862	2663962-2664936	218835-220190	218309-218729	577826-578270	586178-587307	-	1775704-1777441	2754349-2755701	-	-	-
DE829	18	2838314-2839754	-	-	2825823-2826618	-	1560772-1561504	2223263-2223542	3944-4790	2825188-2825731	2824361-2825192	1297627-1298287	1296275-1297631	-	-	-	2680842-2682849	2682949-2683923	241397-242752	240871-241291	596217-596661	604569-605698	10250-11794	1795039-1796776	2773875-2775227	-	-	-
ES536	18	2846508-2847948	-	-	2834649-2835444	-	1582121-1582853	2245144-2245423	3427-4273	2835536-2836079	2836075-2836906	1319329-1319989	1317977-1319333	-	-	-	2702600-2704607	2704707-2705681	228879-230234	228353-228773	587191-587635	595539-596668	9733-11277	1816769-1818506	2795666-2797018	-	-	-
FI535	18	2892162-2893602	-	-	2878311-2879106	-	1607765-1607964	2271040-2271319	3429-4275	2879198-2879741	2879737-2880568	1345178-1345838	1343826-1345182	-	-	-	2728270-2730277	2730377-2731351	287454-288809	286928-287348	644174-644618	652526-653655	9735-11279	1842682-1844419	2820832-2822184	-	-	-
Ge301	15	2845134-2846574	-	-	-	-	1538671-1539403	2226429-2226708	2790944-2791790	-	-	1276186-1276846	1274834-1276190	-	-	-	2683837-2685844	2685944-2686918	218047-219402	217521-217941	575983-576427	584315-585444	2797250-2798794	1774134-1775871	2777012-2778364	-	-	-
Ge302	15	2855418-2856858	-	-	-	-	2821603-2822335	2210874-2211153	3421-4267	-	-	1299684-1300344	1298332-1299688	-	-	-	2668101-2670108	2670208-2671182	241250-242605	240724-241144	599221-599665	607557-608686	9727-11271	1789981-1791718	2761158-2762510	-	-	-
Ge303	15	2835314-2836754	-	-	-	-	2816220-2816952	2248108-2248387	3417-4263	-	-	1297077-1297737	1295725-1297081	-	-	-	2705335-2707342	2707442-2708416	241192-242547	240666-241086	599215-599659	607543-608672	9723-11267	1794794-1796531	2798296-2799648	-	-	-
Ge304	15	2854609-2856049	-	-	-	-	2777173-2777905	2254760-2255039	3421-4267	-	-	1336654-1337314	1335302-1336658	-	-	-	2713879-2715886	2715986-2716960	282917-284272	282391-282811	640890-641334	649226-650355	9727-11271	1832610-1834347	54509-55861	-	-	-
Ge305	15	2852292-2853732	-	-	-	-	2809976-2810708	2212832-2213111	3417-4263	-	-	1299498-1300158	1298146-1299502	-	-	-	2670295-2672302	2672402-2673376	241258-242613	240732-241152	599152-599596	607480-608609	9723-11267	1790364-1792101	2763349-2764701	-	-	-
Ge306	15	2815962-2817402	-	-	-	-	2812516-2813248	2212716-2212995	3423-4269	-	-	1300170-1300830	1298818-1300174	-	-	-	2671860-2673867	2673967-2674941	241392-242747	240866-241286	599473-599917	607813-608942	9729-11273	1810930-1812667	2764768-2766120	-	-	-
Ge307	15	2831746-2833186	-	-	-	-	1564564-1565296	2221611-2221890	3429-4275	-	-	1301768-1302428	1300416-1301772	-	-	-	2679174-2681181	2681281-2682255	242704-244059	242178-242598	600943-601387	609295-610424	9735-11279	1799394-1801131	2772389-2773741	-	-	-
Ge308	15	2847126-2848566	-	-	-	-	2834803-2835535	2417452-2417731	3427-4273	-	-	1536825-1537485	1537481-1538837	-	-	-	133180-135187	135287-136261	454634-455989	454108-454528	812715-813159	821063-822192	9733-11277	1059939-1061676	226191-227543	-	-	-
Ge309	15	2850993-2852433	-	-	-	-	1563216-1563948	2217711-2217990	3427-4273	-	-	1300128-1300788	1298776-1300132	-	-	-	2675154-2677161	2677261-2678235	241282-242637	240756-241176	599362-599806	607710-608839	9733-11277	1797423-1799160	2768103-2769455	-	-	-
Ge310	15	2840139-2841579	-	-	-	-	2832879-2833611	2250576-2250855	3423-4269	-	-	1300813-1301473	1299461-1300817	-	-	-	2708052-2710059	2710159-2711133	242371-243726	241845-242265	600380-600824	608720-609849	9729-11273	1793766-1795503	2801017-2802369	-	-	-
Ge311	15	2853001-2854441	-	-	-	-	2817993-2818725	2247958-2248237	3421-4267	-	-	1336368-1337028	1335016-1336372	-	-	-	2705929-2707936	2708036-2709010	283462-284817	282936-283356	641435-641879	649771-650900	9727-11271	1827286-1829023	54568-55920	-	-	-
Ge312	15	2881056-2882496	-	-	-	-	2816294-2817026	1025506-1025785	3427-4273	-	-	2200713-2201373	2201369-2202725	-	-	-	1483092-1485099	1485199-1486173	241211-242566	240685-241105	599289-599733	607637-608766	9733-11277	1708615-1710352	1576149-1577501	-	-	-
Ge313	16	2887643-2889083	349-1110	-	-	-	2874697-2875429	2433263-2433542	2791233-2792079	-	-	1485327-1485987	1483975-1485331	-	-	-	104551-106558	106658-107632	426233-427588	425707-426127	784373-784817	792713-793842	2797539-2799083	1976133-1977870	197713-199065	-	-	-
Ge314	15	2840085-2841525	-	-	-	-	2809446-2810178	2213643-2213922	3427-4273	-	-	1300218-1300878	1298866-1300222	-	-	-	2672778-2674785	2674885-2675859	241325-242680	240799-241219	599406-599850	607752-608881	9733-11277	1791138-1792875	2765794-2767146	-	-	-
Ge315	15	2835024-2836464	-	-	-	-	2817394-2818126	2213955-2214234	3427-4273	-	-	1300676-1301336	1299324-1300680	-	-	-	2671434-2673441	2673541-2674515	241219-242574	240693-241113	599651-600095	607999-609128	9733-11277	1813408-1815145	2764375-2765727	-	-	-
Ge316	15	2856081-2857521	-	-	-	-	2823701-2824433	2250593-2250872	3421-4267	-	-	1299557-1300217	1298205-1299561	-	-	-	2709889-2711896	2711996-2712970	241287-242642	240761-241181	599256-599700	607592-608721	9727-11271	1793651-1795388	2802527-2803879	-	-	-
Ge318	15	2866450-2867890	-	-	-	-	2844878-2845610	2247772-2248051	3417-4263	-	-	1300822-1301482	1299470-1300826	-	-	-	2705019-2707026	2707126-2708100	242350-243705	241824-242244	600547-600991	608875-610004	9723-11267	1796175-1797912	2797991-2799343	-	-	-
Ge319	16	2871729-2873169	393-1154	-	-	-	2856310-2857042	2404114-2404393	4929-5775	-	-	1442337-1442997	1440985-1442341	-	-	-	112513-114520	114620-115594	434101-435456	433575-433995	742487-742931	750831-751960	11235-12779	1982538-1984275	205650-207002	-	-	-
Ge320	15	2781876-2783316	-	-	-	-	2739933-2740665	2147525-2147804	3417-4263	-	-	1267207-1267867	1267863-1269219	-	-	-	2606397-2608404	2608504-2609478	169860-171215	169334-169754	527757-528201	536085-537214	9723-11267	774156-775893	2699348-2700700	-	-	-
Ge321	15	2827637-2829077	-	-	-	-	2820751-2821483	2296032-2296311	3427-4273	-	-	1382134-1382794	1380782-1382138	-	-	-	2755244-2757251	2757351-2758325	323518-324873	322992-323412	681449-681893	689797-690926	9733-11277	1873363-1875100	94654-96006	-	-	-
Ge322	15	2856655-2858095	-	-	-	-	2844784-2845516	2220908-2221187	3896-4742	-	-	1298452-1299112	1297100-1298456	-	-	-	2685743-2687750	2687850-2688824	242630-243985	242104-242524	600472-600916	608808-609937	10202-11746	1773985-1775722	2778704-2780056	-	-	-
Ge323	15	2825515-2826955	-	-	-	-	2804312-2805044	2240127-2240406	3423-4269	-	-	1342341-1343001	1340989-1342345	-	-	-	2697231-2699238	2699338-2700312	283754-285109	283228-283648	641940-642384	650283-651412	9729-11273	1817903-1819640	55150-56502	-	-	-
Ge324	15	2845977-2847417	-	-	-	-	2849226-2849958	2216142-2216421	3427-4273	-	-	1301519-1302179	1300167-1301523	-	-	-	2673684-2675691	2675791-2676765	241349-242704	240823-241243	599809-600253	608157-609286	9733-11277	1794801-1796538	2766097-2767449	-	-	-
Ge325	15	2867530-2868972	-	-	-	-	2843465-2844197	2321742-2322021	3399-4245	-	-	1402057-1402717	1400705-1402061	-	-	-	25725-27732	27832-28806	346427-347782	345901-346321	703443-703887	711735-712864	9705-11249	1894321-1896058	118151-119503	-	-	-
Ge326	15	2837487-2838927	-	-	-	-	2821573-2822305	2256495-2256774	3429-4275	-	-	1342844-1343504	1341492-1342848	-	-	-	2713965-2715972	2716072-2717046	284150-285505	283624-284044	642589-643033	650941-652070	9735-11279	1833916-1835653	54508-55860	-	-	-
Ge327	15	2881894-2883334	-	-	-	-	2850001-2850733	2326034-2326313	3397-4243	-	-	1399928-1400588	1398576-1399932	-	-	-	25715-27722	27822-28796	346784-348139	346258-346678	703762-704206	712050-713179	9703-11247	1893397-1895134	118521-119873	-	-	-
Ge328	15	2826820-2828260	-	-	-	-	1563381-1564113	2220189-2220468	3429-4275	-	-	1300667-1301327	1299315-1300671	-	-	-	2677236-2679243	2679343-2680317	241464-242819	240938-241358	599583-600027	607935-609064	9735-11279	1798213-1799950	2770261-2771613	-	-	-
Ge329	15	2917328-2918768	-	-	-	-	2852941-2853673	2347392-2347671	3427-4273	-	-	1407591-1408251	1406239-1407595	-	-	-	25936-27943	28043-29017	347680-349035	347154-347574	705934-706378	714282-715411	9733-11277	1900010-1901747	119112-120464	-	-	-
Ge330	15	2841877-2843317	-	-	-	-	2839655-2840387	2344662-2344941	3429-4275	-	-	1406689-1407349	1405337-1406693	-	-	-	25942-27949	28049-29023	347533-348888	347007-347427	705622-706066	713974-715103	9735-11279	1897439-1899176	119003-120355	-	-	-
Ge331	15	2828612-2830052	-	-	-	-	1645537-1646269	2304968-2305247	3429-4275	-	-	1383104-1383764	1381752-1383108	-	-	-	2761951-2763958	2764058-2765032	324271-325626	323745-324165	682385-682829	690737-691866	9735-11279	1880017-1881754	95708-97060	-	-	-
Ge332	15	2877518-2878958	-	-	-	-	1563391-1564123	2221138-2221417	3417-4263	-	-	1300613-1301273	1299261-1300617	-	-	-	2677962-2679969	2680069-2681043	242350-243705	241824-242244	600380-600824	608714-609843	9723-11267	1799384-1801121	2770894-2772246	-	-	-
Ge333	15	2835914-2837354	-	-	-	-	2812903-2813635	2213853-2214132	3431-4277	-	-	1302429-1303089	1301077-1302433	-	-	-	2671175-2673182	2673282-2674256	241238-242593	240712-241132	601580-602024	609932-611061	9737-11281	1791833-1793570	2763944-2765296	-	-	-
Ge334	15	2853286-2854726	-	-	-	-	2813048-2813780	2216236-2216515	3433-4279	-	-	1325383-1326043	1324031-1325387	-	-	-	2674049-2676056	2676156-2677130	241506-242861	240980-241400	623717-624161	632073-633202	9739-11283	396099-397836	2767017-2768369	-	-	-
Ge335	15	2836726-2838166	-	-	-	-	2833110-2833842	2334820-2335099	3431-4277	-	-	1420333-1420993	1418981-1420337	-	-	-	38685-40692	40792-41766	360452-361807	359926-360346	719243-719687	727599-728728	9737-11281	1912274-1914011	131742-133094	-	-	-
Ge336	15	2835143-2836583	-	-	-	-	1593317-1594049	2246698-2246977	3429-4275	-	-	1330461-1331121	1329109-1330465	-	-	-	2738807-2740814	2740914-2741888	271744-273099	271218-271638	630851-631295	639202-640331	9735-11279	1828635-1830372	42749-44101	-	-	-
Ge337	15	2848246-2849686	-	-	-	-	2824020-2824752	2251494-2251773	3425-4271	-	-	1372875-1373535	1373531-1374887	-	-	-	2716715-2718722	2718822-2719796	283029-284384	282503-282923	641298-641742	649642-650771	9731-11275	878211-879948	54511-55863	-	-	-
Ge338	15	2827877-2829317	-	-	-	-	1563044-1563776	2220426-2220705	4071-4917	-	-	1300354-1301014	1299002-1300358	-	-	-	2677118-2679125	2679225-2680199	241785-243140	241259-241679	599826-600270	608166-609295	10377-11921	1797219-1798953	2770138-2771490	-	-	-
Ge339	15	2864170-2865610	-	-	-	-	2860214-2860946	2326926-2327205	3427-4273	-	-	1406435-1407095	1405083-1406439	-	-	-	25936-27943	28043-29017	347632-348987	347106-347526	706049-706493	714397-715526	9733-11277	1897547-1899284	118995-120347	-	-	-
Ge340	15	2851555-2852995	-	-	-	-	2822070-2822802	2215806-2216085	3429-4275	-	-	1261590-1262250	1260238-1261594	-	-	-	2674063-2676070	2676170-2677144	241733-243088	241207-241627	561111-561555	569463-570592	9735-11279	1791192-1792929	2766821-2768173	-	-	-
Ge341	15	2850075-2851515	-	-	-	-	2828202-2828934	2245161-2245440	3429-4275	-	-	1301223-1301883	1299871-1301227	-	-	-	2703495-2705502	2705602-2706576	241385-242740	240859-241279	600078-600522	608430-609559	9735-11279	1792717-1794454	2796625-2797977	-	-	-
Ge342	15	2844745-2846185	-	-	-	-	2834299-2835031	2249344-2249623	3429-4275	-	-	1301013-1301673	1299661-1301017	-	-	-	2706827-2708834	2708934-2709908	241225-242580	240699-241119	599708-600152	608060-609189	9735-11279	1792307-1794044	2799884-2801236	-	-	-
Ge343	15	2830248-2831688	-	-	-	-	1942077-1942809	1023965-1024244	3415-4261	-	-	2204807-2205467	2205463-2206819	-	-	-	1480606-1482613	1482713-1483687	241187-242542	240661-241081	599035-599479	607359-608488	9721-11265	1704974-1706711	1573477-1574829	-	-	-
Ge344	15	2856897-2858337	-	-	-	-	1533873-1534605	2229095-2229374	3415-4261	-	-	1271206-1271866	1269854-1271210	-	-	-	2686620-2688627	2688727-2689701	241515-242870	240989-241409	570678-571122	579002-580131	9721-11265	1798936-1800673	2779050-2780351	-	-	-
Ge345	15	2839067-2840507	-	-	-	-	2806491-2807223	1933453-1933732	3429-4275	-	-	1036846-1037506	1035494-1036850	-	-	-	2391176-2393183	2393283-2394257	2712565-2713920	2712039-2712459	334506-334950	342858-343987	9735-11279	1511881-1513618	2484119-2485471	-	-	-
Ge346	15	2842868-2844308	-	-	-	-	1563664-1564396	2219725-2220004	3427-4273	-	-	1301190-1301850	1299838-1301194	-	-	-	2676468-2678475	2678575-2679549	241424-242779	240898-241318	599507-599951	607855-608984	9733-11277	1798582-1800319	2769547-2770899	-	-	-
Ge347	15	2824254-2825694	-	-	-	-	2795704-2796436	2198108-2198387	3427-4273	-	-	1300262-1300922	1298911-1300266	-	-	-	2657617-2659624	2659724-2660698	241407-242762	240881-241301	599646-600090	608000-609129	9733-11277	1776057-1777794	2750503-2751855	-	-	-
Ge348	15	2834691-2836131	-	-	-	-	2823987-2824719	2214285-2214564	3425-4271	-	-	1302058-1302718	1300706-1302062	-	-	-	2671729-2673736	2673836-2674810	241654-243009	241128-241548	599683-600127	608027-609156	9731-11275	1792014-1793751	2763353-2764705	-	-	-
Ge349	15	2855545-2856985	-	-	-	-	1668837-1669569	2333440-2333719	3427-4273	-	-	1406079-1406739	1404727-1406083	-	-	-	25976-27983	28083-29057	347442-348797	346916-347336	705525-705969	713873-715002	9733-11277	1905176-1906913	118808-120160	-	-	-
Ge350	15	2854065-2855505	-	-	-	-	1563438-1564170	2219354-2219633	3427-4273	-	-	1300732-1301392	1299380-1300736	-	-	-	2676405-2678412	2678512-2679486	241510-242865	240984-241404	600159-600603	608507-609636	9733-11277	1797737-1799474	2769331-2770683	-	-	-
Ge351	16	2905052-2906492	23559-24320	-	-	-	1669822-1670554	2350609-2350888	3419-4265	-	-	1407149-1407809	1405797-1407153	-	-	-	27390-29397	29497-30471	348568-349923	348042-348462	706836-707280	715167-716296	9725-11269	1903965-1905702	120172-121524	-	-	-
Ge352	15	2843709-2845149	-	-	-	-	2854743-2855475	2321912-2322191	3550-4396	-	-	1408244-1408904	1406892-1408248	-	-	-	26055-28062	28162-29136	347915-349270	347389-347809	706395-706839	714739-715868	9856-11400	1899428-1901165	119199-120551	-	-	-
Ge353	15	2870832-2872272	-	-	-	-	2886827-2887559	2319151-2319430	3395-4241	-	-	1396900-1397560	1395548-1396904	-	-	-	25709-27716	27816-28790	343963-345318	343437-343857	700760-701204	709044-710173	9701-11245	1890714-1892451	115711-117063	-	-	-
Ge354	15	2831319-2832759	-	-	-	-	2819217-2819949	2213174-2213453	3425-4271	-	-	1300936-1301596	1299584-1300940	-	-	-	2670827-2672834	2672934-2673908	241197-242552	240671-241091	600043-600487	608387-609516	9731-11275	1791979-1793716	2763970-2765322	-	-	-
Ge355	15	2878201-2879641	-	-	-	-	1563816-1564548	2223883-2224162	3425-4271	-	-	1301310-1301970	1299958-1301314	-	-	-	2681628-2683635	2683735-2684709	242563-243918	242037-242457	600740-601184	609084-610213	9731-11275	1798117-1799854	2774554-2775906	-	-	-
Ge356	15	2838601-2840041	-	-	-	-	2816723-2817455	2212274-2212553	3425-4271	-	-	1300238-1300898	1298886-1300242	-	-	-	2671605-2673612	2673712-2674686	241708-243063	241182-241602	599875-600319	608219-609348	9731-11275	1791110-1792847	2764759-2766111	-	-	-
Ge357	15	2873764-2875204	-	-	-	-	1563638-1564370	2222832-2223111	3429-4275	-	-	1300829-1301489	1299477-1300833	-	-	-	2680359-2682366	2682466-2683440	241522-242877	240996-241416	599863-600307	608215-609344	9735-11279	1800142-1801879	2773403-2774755	-	-	-
Ge358	15	2845979-2847419	-	-	-	-	2813667-2814399	2324837-2325116	3423-4269	-	-	1406072-1406732	1404720-1406076	-	-	-	25742-27749	27849-28823	347218-348573	346692-347112	705239-705683	713579-714708	9729-11273	1897173-1898910	118798-120150	-	-	-
Ge359	15	2874324-2875764	-	-	-	-	1561875-1562607	2217287-2217566	3411-4257	-	-	1299182-1299842	1297830-1299186	-	-	-	2674167-2676174	2676274-2677248	241099-242454	240573-240993	599136-599580	607452-608581	9717-11261	1795827-1797564	2765976-2767328	-	-	-
Ge360	15	2895076-2896516	-	-	-	-	2883641-2884373	2326488-2326767	3421-4267	-	-	1406130-1406790	1404778-1406134	-	-	-	25918-27925	28025-28999	347126-348481	346600-347020	705225-705669	713561-714690	9727-11271	1899886-1901623	118540-119892	-	-	-
Ge361	15	2886480-2887920	-	-	-	-	2855581-2856313	2348993-2349272	3427-4273	-	-	1406662-1407322	1405310-1406666	-	-	-	25936-27943	28043-29017	347561-348916	347035-347455	705469-705913	713817-714946	9733-11277	1900471-1902208	118993-120345	-	-	-
Ge362	15	2824956-2826396	-	-	-	-	2817439-2818171	2294705-2294984	3415-4261	-	-	1382053-1382713	1380701-1382057	-	-	-	2752035-2754042	2754142-2755116	324233-325588	323707-324127	682095-682539	690419-691548	9721-11265	1872359-1874096	95779-97131	-	-	-
Ge363	15	2856995-2858435	-	-	-	-	2841138-2841870	1131776-1132055	3421-4267	-	-	2202993-2203653	2203649-2205005	-	-	-	25964-27971	28071-29045	348323-349678	347797-348217	706472-706916	714808-715937	9727-11271	1708977-1710714	119451-120803	-	-	-
Ge364	15	2836999-2838439	-	-	-	-	2795363-2796095	2199857-2200136	3425-4271	-	-	1300484-1301144	1299133-1300488	-	-	-	2657362-2659369	2659469-2660443	241660-243015	241134-241554	599785-600229	608129-609258	9731-11275	1778275-1780012	2750248-2751600	-	-	-
Ge365	15	2877057-2878497	-	-	-	-	2847693-2848425	2304947-2305226	3423-4269	-	-	1406881-1407541	1405529-1406885	-	-	-	25924-27931	28031-29005	347550-348905	347024-347444	705782-706226	714122-715251	9729-11273	1882768-1884505	119070-120422	-	-	-
Ge366	15	2876411-2877851	-	-	-	-	2848113-2848845	2344152-2344431	3421-4267	-	-	1401824-1402484	1400472-1401828	-	-	-	25918-27925	28025-28999	347383-348738	346857-347277	701072-701516	709408-710537	9727-11271	1894220-1895957	118975-120327	-	-	-
Ge367	15	2834501-2835941	-	-	-	-	2790801-2791533	2226491-2226770	3552-4398	-	-	1301472-1302132	1300120-1301476	-	-	-	2684127-2686134	2686234-2687208	242490-243845	241964-242384	600392-600836	608740-609869	9858-11402	1759749-1761486	2777268-2778620	-	-	-
Ge368	15	2890154-2891594	-	-	-	-	2846969-2847701	2321139-2321418	3550-4396	-	-	1406902-1407562	1405550-1406906	-	-	-	26055-28062	28162-29136	347691-349046	347165-347585	705404-705848	713748-714877	9856-11400	1897511-1899248	119183-120535	-	-	-
Ge369	15	2886044-2887484	-	-	-	-	2834616-2835348	1021485-1021764	3421-4267	-	-	2202200-2202860	2202856-2204212	-	-	-	1479001-1481008	1481108-1482082	241287-242642	240761-241181	599279-599723	607615-608744	9727-11271	1708488-1710225	1572058-1573410	-	-	-
Ge370	15	2901822-2903262	-	-	-	-	2777869-2778601	2322086-2322365	3423-4269	-	-	1406353-1407013	1405001-1406357	-	-	-	25924-27931	28031-29005	347776-349131	347250-347670	705825-706269	714165-715294	9729-11273	1897070-1898807	119057-120409	-	-	-
Ge371	15	2883942-2885382	-	-	-	-	2853236-2853968	2328684-2328963	3421-4267	-	-	1406546-1407206	1405194-1406550	-	-	-	25918-27925	28025-28999	347683-349038	347157-347577	705751-706195	714087-715216	9727-11271	1896891-1898628	119083-120435	-	-	-
Ge372	15	2858947-2860387	-	-	-	-	2852128-2852860	2215187-2215466	3554-4400	-	-	1301310-1301970	1299958-1301314	-	-	-	2672917-2674924	2675024-2675998	241551-242906	241025-241445	599906-600350	608258-609387	9860-11404	1792230-1793967	2765897-2767249	-	-	-
Ge373	15	2870906-2872346	-	-	-	-	2839671-2840403	2326282-2326561	3552-4398	-	-	1407404-1408064	1406052-1407408	-	-	-	26060-28067	28167-29141	347909-349264	347383-347803	706095-706539	714442-715571	9858-11402	1898298-1900035	119197-120549	-	-	-
Ge374	15	2862217-2863657	-	-	-	-	2778409-2779141	2216115-2216394	3423-4269	-	-	1299668-1300328	1298316-1299672	-	-	-	2673550-2675557	2675657-2676631	241137-242492	240611-241031	599026-599470	607366-608495	9729-11273	1792529-1794266	2766606-2767958	-	-	-
Ge375	15	2861617-2863057	-	-	-	-	2849339-2850071	2320952-2321231	3423-4269	-	-	1405386-1406046	1404034-1405390	-	-	-	25924-27931	28031-29005	349011-350366	348485-348905	706643-707087	714983-716112	9729-11273	1863175-1864912	119353-120705	-	-	-
Ge377	15	2849823-2851263	-	-	-	-	2823143-2823875	2299491-2299770	3413-4259	-	-	1378971-1379631	1377619-1378975	-	-	-	2756848-2758855	2758955-2759929	323833-325188	323307-323727	681590-682034	689910-691039	9719-11263	1873341-1875078	95473-96825	-	-	-
Ge378	15	2908792-2910232	-	-	-	-	2845533-2846265	1120390-1120669	3556-4402	-	-	2189142-2189802	2189798-2191154	-	-	-	15326-17333	17433-18407	336596-337951	336070-336490	694842-695286	703198-704327	9862-11406	1696451-1698188	108130-109482	-	-	-
Ge379	15	2879680-2881120	-	-	-	-	2815207-2815939	2345685-2345964	3554-4400	-	-	1407387-1408047	1406035-1407391	-	-	-	26067-28074	28174-29148	347863-349218	347337-347757	706117-706561	714469-715598	9860-11404	1866472-1868209	119242-120594	-	-	-
Ge380	15	2878746-2880186	-	-	-	-	2867013-2867745	2343702-2343981	3552-4398	-	-	1427719-1428379	1426367-1427723	-	-	-	26061-28068	28168-29142	347180-348535	346654-347074	726903-727347	735251-736380	9858-11402	500323-502060	118735-120087	-	-	-
Ge381	15	2873750-2875190	-	-	-	-	1724822-1725554	2416766-2417045	4075-4921	-	-	1462002-1462662	1460650-1462006	-	-	-	82304-84311	84411-85385	404828-406183	404302-404722	763307-763751	771659-772788	10381-11925	1959975-1961712	175440-176792	-	-	-
Ge382	15	2831882-2833322	-	-	-	-	2838527-2839259	1129478-1129757	3421-4267	-	-	2194722-2195382	2195378-2196734	-	-	-	25918-27925	28025-28999	346870-348225	346344-346764	704603-705047	712939-714068	9727-11271	1703335-1705072	118462-119814	-	-	-
Ge383	15	2872252-2873692	-	-	-	-	2858152-2858884	2326688-2326967	3425-4271	-	-	1407508-1408168	1406156-1407512	-	-	-	25930-27937	28037-29011	347661-349016	347135-347555	706034-706478	714378-715507	9731-11275	1898422-1900159	119033-120385	-	-	-
Ge384	15	2871497-2872937	-	-	-	-	2852271-2853003	2320647-2320926	3421-4267	-	-	1357460-1358120	1356108-1357464	-	-	-	25918-27925	28025-28999	347649-349004	347123-347543	656193-656637	664529-665658	9727-11271	1898854-1900591	119141-120493	-	-	-
Ge385	15	2895989-2897429	-	-	-	-	2872322-2873054	2214886-2215165	3421-4267	-	-	1301058-1301718	1299706-1301062	-	-	-	2672180-2674187	2674287-2675261	242329-243684	241803-242223	600198-600642	608534-609663	9727-11271	1794959-1796696	2764852-2766204	-	-	-
Ge386	15	2846586-2848026	-	-	-	-	2850689-2851421	2324374-2324653	3552-4398	-	-	1407202-1407862	1405850-1407206	-	-	-	26061-28068	28168-29142	347760-349115	347234-347654	706146-706590	714494-715623	9858-11402	1896988-1898725	119116-120468	-	-	-
Ge387	13	2846618-2848058	-	-	-	-	2792058-2792790	2199559-2199838	-	-	-	1276255-1276915	1274903-1276259	-	-	-	2656891-2658898	2658998-2659972	217951-219306	217425-217845	575222-575666	583562-584691	-	1767364-1769101	2749775-2751127	-	-	-
Ge388	15	2906010-2907450	-	-	-	-	2852826-2853558	1024572-1024851	3423-4269	-	-	2203841-2204501	2204497-2205853	-	-	-	1481875-1483882	1483982-1484956	241137-242492	240611-241031	599247-599691	607587-608716	9729-11273	1707328-1709065	1574931-1576283	-	-	-
Ge389	15	2878845-2880285	-	-	-	-	2862437-2863169	2298610-2298889	2771926-2772772	-	-	1383018-1383678	1381666-1383022	-	-	-	2692-4699	4799-5773	324235-325590	323709-324129	682171-682615	690515-691644	2764922-2766466	1873795-1875532	95748-97100	-	-	-
Ge390	15	2872161-2873601	-	-	-	-	2841643-2842375	1025157-1025436	3423-4269	-	-	2199088-2199748	2199744-2201100	-	-	-	1482408-1484415	1484515-1485489	242340-243695	241814-242234	600419-600863	608759-609888	9729-11273	1707120-1708857	1575510-1576862	-	-	-
Ge391	15	2888906-2890346	-	-	-	-	2815002-2815734	2328459-2328738	3550-4395	-	-	1405750-1406410	1404398-1405754	-	-	-	26053-28060	28160-29134	347230-348585	346704-347124	704791-705235	713135-714264	9855-11399	1896563-1898300	118800-120152	-	-	-
Ge392	15	2848488-2849928	-	-	-	-	2813551-2814283	2213761-2214040	3554-4400	-	-	1301029-1301689	1299677-1301033	-	-	-	2671143-2673150	2673250-2674224	242149-243504	241623-242043	599846-600290	608198-609327	9860-11404	1792154-1793891	2764356-2765708	-	-	-
Ge393	15	2828619-2830059	-	-	-	-	1562639-1563371	2221986-2222265	3429-4275	-	-	1299925-1300585	1298573-1299929	-	-	-	2678608-2680615	2680715-2681689	241303-242658	240777-241197	599141-599585	607493-608622	9735-11279	1794916-1796653	2771534-2772886	-	-	-
Ge394	15	2878735-2880175	-	-	-	-	2870765-2871497	2325961-2326240	3421-4267	-	-	1406711-1407371	1405359-1406715	-	-	-	25918-27925	28025-28999	347438-348793	346912-347332	705594-706038	713930-715059	9727-11271	1897761-1899498	118973-120325	-	-	-
Ge395	15	2370692-2372132	-	-	-	-	2054541-2055273	168812-169091	1230386-1231232	-	-	2623768-2624428	2624424-2625780	-	-	-	821912-823919	824019-824993	1281929-1283284	1283390-1283810	1871295-1871739	845657-846786	1223382-1224926	2426466-2428203	1419870-1421222	-	-	-
Ge396	15	2891770-2893210	-	-	-	-	2854187-2854919	2324145-2324424	3550-4396	-	-	1406617-1407277	1405265-1406621	-	-	-	26055-28062	28162-29136	347266-348621	346740-347160	705207-705651	713551-714680	9856-11400	1897341-1899078	118787-120139	-	-	-
Ge397	15	2859299-2860739	-	-	-	-	2812124-2812856	2217651-2217930	3944-4790	-	-	1298918-1299578	1297566-1298922	-	-	-	2675218-2677225	2677325-2678299	241733-243088	241207-241627	598021-598465	606353-607482	10250-11794	1790057-1791794	2768274-2769626	-	-	-
Ge398	15	2840056-2841496	-	-	-	-	1591491-1592223	2251168-2251447	3417-4263	-	-	1328647-1329307	1327295-1328651	-	-	-	2708419-2710426	2710526-2711500	268710-270065	268184-268604	628004-628448	636332-637461	9723-11267	1827784-1829521	2801347-2802699	-	-	-
Ge399	13	2816661-2818101	-	-	-	-	2834779-2835511	2224490-2224769	-	-	-	1277263-1277923	1275911-1277267	-	-	-	2681764-2683771	2683871-2684845	218396-219751	217870-218290	576466-576910	584802-585931	-	1733822-1735559	2774816-2776168	-	-	-
Ge400	15	2862033-2863473	-	-	-	-	2871775-2872507	2328492-2328771	3554-4400	-	-	1407227-1407887	1405875-1407231	-	-	-	26067-28074	28174-29148	348046-349401	347520-347940	706619-707063	714971-716100	9860-11404	1866711-1868448	119251-120603	-	-	-
Ge401	15	2828465-2829905	-	-	-	-	2833965-2834697	2365062-2365341	3423-4269	-	-	1445507-1446167	1444155-1445511	-	-	-	79896-81903	82003-82977	401592-402947	401066-401486	760337-760781	768677-769806	9729-11273	1936053-1937790	173174-174526	-	-	-
Ge402	15	2779776-2781216	-	-	-	-	2786834-2787566	2327717-2327996	3554-4400	-	-	1407567-1408227	1406215-1407571	-	-	-	25406-27413	27513-28487	348504-349859	347978-348398	706711-707155	715063-716192	9860-11404	1899056-1900793	118548-119900	-	-	-
Ge403	15	2895471-2896910	-	-	-	-	2843019-2843751	1024046-1024325	3421-4267	-	-	2200091-2200751	2200747-2202103	-	-	-	1481488-1483495	1483595-1484569	240591-241946	240065-240485	598651-599095	606987-608116	9727-11271	1706481-1708218	1574508-1575860	-	-	-
Ge404	15	2853598-2855038	-	-	-	-	2814871-2815603	2214436-2214715	3944-4790	-	-	1301597-1302257	1300245-1301601	-	-	-	2671913-2673920	2674020-2674994	241879-243234	241353-241773	600590-601034	608942-610071	10250-11794	1792822-1794559	2765032-2766384	-	-	-
Ge405	14	2809146-2810586	-	-	-	-	-	2266711-2266990	3427-4273	-	-	1345945-1346605	1344593-1345949	-	-	-	2724554-2726561	2726661-2727635	299754-301109	299228-299648	644119-644563	652466-653595	2830779-2832323	1824861-1826598	71052-72404	-	-	-
Ge406	15	2838347-2839710	-	-	-	-	2877521-2878253	2293404-2293683	3423-4269	-	-	1382677-1383337	1381325-1382681	-	-	-	2750780-2752787	2752887-2753861	323090-324445	322564-322984	681618-682062	689958-691087	9729-11273	1840692-1842429	94671-96023	-	-	-
Ge407	15	2854198-2855638	-	-	-	-	2843573-2844305	1026598-1026877	4071-4917	-	-	2205387-2206047	2206043-2207399	-	-	-	1483738-1485745	1485845-1486819	243220-244575	242694-243114	601290-601734	609626-610755	10377-11921	1709952-1711689	1576834-1578186	-	-	-
Ge408	15	2848711-2850151	-	-	-	-	2844033-2844765	1132916-1133195	3554-4400	-	-	2202445-2203105	2203101-2204457	-	-	-	26067-28074	28174-29148	349154-350509	348628-349048	707380-707824	715732-716861	9860-11404	1710364-1712101	119127-120479	-	-	-
Ge409	15	2817616-2819046	-	-	-	-	2807544-2808276	2261519-2261798	3421-4267	-	-	1362178-1362838	1360826-1362182	-	-	-	2720221-2722228	2722328-2723302	304466-305821	303940-304360	660046-660490	668381-669510	9727-11271	1840807-1842544	75961-77313	-	-	-
Ge410	13	2808721-2810161	-	-	-	-	2798785-2799517	2408914-2409193	-	-	-	1468049-1468709	1466697-1468053	-	-	-	85190-87197	87297-88271	407208-408563	406682-407102	766028-766472	774376-775505	-	1959343-1961080	178296-179648	-	-	-
Ge411	15	2891940-2893380	-	-	-	-	2866906-2867638	1134249-1134528	3552-4398	-	-	2195995-2196655	2196651-2198007	-	-	-	26314-28321	28421-29395	349404-350759	348878-349298	707594-708038	715942-717071	9858-11402	1703776-1705513	119507-120859	-	-	-
Ge412	14	2813083-2814523	-	-	-	-	-	2198121-2198400	3421-4267	-	-	1298393-1299053	1297041-1298397	-	-	-	2654878-2656885	2656985-2657959	241169-242524	240643-241063	598245-598689	606581-607710	9727-11271	1776098-1777835	2747749-2749101	-	-	-
Ge413	15	2863867-2865307	-	-	-	-	1562268-1563000	2252409-2252688	3413-4259	-	-	1299332-1299992	1297980-1299336	-	-	-	2709672-2711679	2711779-2712753	241111-242466	240585-241005	599249-599693	607569-608698	9719-11263	1796442-1798179	2802600-2803952	-	-	-
Ge414	13	2804819-2806259	-	-	-	-	2795098-2795830	2223308-2223587	-	-	-	1277440-1278100	1276088-1277444	-	-	-	2680716-2682723	2682823-2683797	217933-219288	217407-217827	576358-576802	584702-585831	-	1768577-1770314	2773598-2774950	-	-	-
Ge415	13	2808874-2810314	-	-	-	-	2762339-2763071	2299531-2299810	-	-	-	1351207-1351867	1349855-1351211	-	-	-	3661-5668	5768-6742	308234-309589	307708-308128	652196-652640	660536-661665	-	1829118-1830855	79735-81087	-	-	-
Ge416	15	2857249-2858689	-	-	-	-	1562882-1563614	2220916-2221195	3427-4273	-	-	1299793-1300453	1298441-1299797	-	-	-	2677909-2679916	2680016-2680990	241328-242683	240802-241222	599409-599853	607757-608886	9733-11277	1797089-1798826	2770837-2772189	-	-	-
HR522	18	2812095-2813535	-	-	2801746-2802541	-	1945028-1945760	1067674-1067953	3435-4281	2802633-2803176	2803172-2804003	2207849-2208509	2208505-2209861	-	-	-	1525401-1527408	1527508-1528482	283048-284403	282522-282942	641675-642119	650039-651168	9741-11285	1709508-1711245	54532-55884	-	-	-
HR523	18	2775776-2777216	-	-	2764013-2764808	-	1509572-1510304	2173910-2174189	3944-4790	2763378-2763921	2762551-2763382	1246491-1247151	1245139-1246495	-	-	-	2631713-2633720	2633820-2634794	170768-172123	170242-170662	530300-530744	538659-539788	10250-11794	1744247-1745984	2724194-2725546	-	-	-
HR524	18	2841937-2843377	-	-	2824975-2825770	-	1559886-1560618	2223826-2224105	15767-16613	2825862-2826405	2826401-2827232	1297406-1298066	1296054-1297410	-	-	-	2677145-2679152	2679252-2680226	236963-238318	236437-236857	595427-595871	603779-604908	2834155-2835574	1794363-1796100	2770183-2771535	-	-	-
HR525	18	2756428-2757868	-	-	2762053-2762848	-	1491684-1492416	2157742-2158021	4025-4871	2762940-2763483	-	1228859-1229519	1227507-1228863	-	-	-	2614758-2616765	2616865-2617839	154165-155520	153639-154059	513112-513556	521451-522580	2720809-2722353	1728580-1730317	2707175-2708527	-	-	-
HR526	18	2760260-2761700	-	-	2768398-2769193	-	1508710-1509442	2172558-2172837	3944-4790	2769285-2769828	2769824-2770655	1245984-1246644	1244632-1245988	-	-	-	2630305-2632312	2632412-2633386	170768-172123	170242-170662	530326-530770	538685-539814	10250-11794	1743224-1744961	2722654-2724006	-	-	-
HR527	18	2765823-2767263	-	-	2738381-2739176	-	1509026-1509758	2172498-2172777	3944-4790	2739268-2739811	2739807-2740638	1246244-1246904	1244892-1246248	-	-	-	2630191-2632198	2632298-2633272	170732-172087	170206-170626	530762-531206	539109-540238	10250-11794	1743309-1745046	2722425-2723777	-	-	-
HR528	18	2833115-2834555	-	-	2828664-2829459	-	1583201-1583933	2235363-2235642	3421-4267	2828029-2828572	2827202-2828033	1320226-1320886	1318874-1320230	-	-	-	2692752-2694759	2694859-2695833	229456-230811	228930-229350	587895-588339	596739-597868	9727-11271	1805333-1807070	2785839-2787191	-	-	-
HR529	18	2838900-2840340	-	-	2827591-2828386	-	1563693-1564425	2227425-2227704	3421-4267	2828478-2829021	2829017-2829848	1301014-1301674	1299662-1301018	-	-	-	2684682-2686689	2686789-2687763	241772-243127	241246-241666	600206-600650	608542-609671	9727-11271	1799331-1801068	2777715-2779067	-	-	-
HR530	18	2852359-2853799	-	-	2842165-2842960	-	1683188-1683920	2346628-2346907	3427-4273	2841530-2842073	2840703-2841534	1419879-1420539	1418527-1419883	-	-	-	38296-40303	40403-41377	359878-361233	359352-359772	718186-718630	726532-727661	9733-11277	1917730-1919467	131331-132683	-	-	-
HR531	18	2814223-2815663	-	-	2802455-2803250	-	1561207-1561939	2226671-2226950	3433-4279	2801820-2802363	2800993-2801824	1298318-1298978	1296966-1298322	-	-	-	2684291-2686298	2686398-2687372	241362-242717	240836-241256	601414-601858	609774-610903	9739-11283	1797600-1799337	2777191-2778543	-	-	-
HR532	18	2845583-2847023	-	-	2837775-2838570	-	1741335-1742067	2405229-2405508	3427-4273	2837140-2837683	2836313-2837144	1478714-1479374	1477362-1478718	-	-	-	94441-96448	96548-97522	417455-418810	416929-417349	775567-776011	783915-785044	2816503-2818047	1975774-1977511	187812-189164	-	-	-
HR533	18	2849921-2851361	-	-	2831688-2832483	-	1739349-1740081	2405230-2405509	3429-4275	2832575-2833118	2833114-2833945	1476112-1476772	1474760-1476116	-	-	-	94445-96452	96552-97526	415934-417289	415408-415828	774514-774958	782866-783995	2805358-2806902	1976453-1978190	187478-188830	-	-	-
HR534	18	2822515-2823955	-	-	2835024-2835819	-	1565282-1566014	2228077-2228356	19803-20649	2835911-2836454	2836450-2837281	1302483-1303143	1301131-1302487	-	-	-	2682166-2684173	2684273-2685247	241091-242446	240565-240985	600540-600984	608900-610029	2349-3893	1799199-1800936	2774861-2776213	-	-	-
HU578	18	2000229-2001669	-	-	3660-4455	-	186305-187037	1821354-1821633	1483654-1484500	3025-3568	2198-3029	2182749-2183409	2183405-2184761	-	-	-	2762624-2764631	2764731-2765705	1416907-1418262	1416381-1416801	1563147-1563591	17251-18380	1476352-1477896	2569225-2570962	2855889-2857241	-	-	-
IT537	18	2846661-2848101	-	-	2814604-2815399	-	1557352-1558084	2202966-2203245	3423-4269	2813969-2814512	2813142-2813973	1298367-1299027	1297015-1298371	-	-	-	2660328-2662335	2662435-2663409	243624-244979	243098-243518	600787-601231	609127-610256	9729-11273	1777093-1778830	2753001-2754353	-	-	-
IT538	18	2834711-2836151	-	-	2843254-2844049	-	1572003-1572735	2234501-2234780	3944-4790	2844141-2844684	2844680-2845511	1309460-1310120	1308108-1309464	-	-	-	2691712-2693719	2693819-2694793	241847-243202	241321-241741	600153-600597	608513-609642	10250-11794	1806649-1808386	2784864-2786216	-	-	-
IT539	18	2779857-2781297	-	-	2800483-2801278	-	2792227-2792959	2275044-2275323	3421-4267	2801370-2801913	2801909-2802740	1364401-1365061	1363049-1364405	-	-	-	2732107-2734114	2734214-2735188	302516-303871	301990-302410	653365-653809	661701-662830	9727-11271	1841403-1843140	74106-75458	-	-	-
IT540	18	2833118-2834558	-	-	2821988-2822783	-	1563718-1564450	2207453-2207732	3355-4201	2821353-2821896	2820526-2821357	1300946-1301606	1299594-1300950	-	-	-	2664828-2666835	2666935-2667909	241141-242496	240615-241035	599481-599925	607829-608958	9661-11205	1783391-1785128	2757931-2759283	-	-	-
IT542	18	2866837-2868277	-	-	2852904-2853699	-	1553911-1554643	2205948-2206227	3429-4275	2853791-2854334	2854330-2855161	1291092-1291752	1289740-1291096	-	-	-	2663632-2665639	2665739-2666713	229568-230923	229042-229462	586576-587020	594928-596057	9735-11279	1773337-1775074	2756449-2757801	-	-	-
IT543	18	2825438-2826878	-	-	2814533-2815328	-	1593702-1594434	2241700-2241979	3429-4275	2815420-2815963	2815959-2816790	1330919-1331578	1329566-1330922	-	-	-	2699758-2701765	2701865-2702839	241490-242845	240964-241384	598518-598962	606870-607999	9735-11279	1821961-1823698	2792815-2794167	-	-	-
IT544	18	2840747-2842187	-	-	2826780-2827575	-	1596864-1597596	2309014-2309293	3423-4269	2826145-2826688	2825318-2826149	1334175-1334835	1332823-1334179	-	-	-	2762045-2764052	2764152-2765126	325247-326602	324721-325141	633571-634015	641911-643040	9729-11273	1880531-1882268	95624-96976	-	-	-
IT545	16	2829636-2831076	-	-	2835210-2836005	-	1613911-1614643	2261873-2262152	-	2834575-2835118	2833748-2834579	1351050-1351710	1349698-1351054	-	-	-	2719143-2721150	2721250-2722224	258057-259412	257531-257951	616195-616639	624554-625683	-	1833616-1835353	2812217-2813569	-	-	-
IT547	18	2817013-2818453	-	-	2783960-2784755	-	1722487-1723219	2375409-2375688	3411-4257	2783325-2783868	2782498-2783329	1459454-1460114	1458102-1459458	-	-	-	82870-84877	84977-85951	404717-406072	404191-404611	763346-763790	771694-772823	9717-11261	1941905-1943642	176215-177567	-	-	-
IT548	18	2782792-2784232	-	-	2769468-2770263	-	1710385-1711117	2362865-2363144	83143-83989	2770355-2770898	2770894-2771725	1447410-1448070	1446058-1447414	-	-	-	58645-60652	60752-61726	406471-407826	405945-406365	764815-765259	773167-774296	89449-90993	1933283-1935020	175563-176915	-	-	-
IT549	18	2826428-2827868	-	-	2810861-2811656	-	1656338-1657070	2295152-2295431	3421-4267	2811748-2812279	2812275-2813106	1393603-1394263	1392251-1393607	-	-	-	15038-17045	17145-18119	338922-340277	338396-338816	696286-696730	704622-705751	9727-11271	1875719-1877456	108023-109375	-	-	-
IT550	18	2839941-2841381	-	-	2830829-2831624	-	1622707-1623439	2285177-2285456	19901-20747	2830194-2830737	2829367-2830198	1360017-1360677	1358665-1360021	-	-	-	2738399-2740406	2740506-2741480	300485-301840	299959-300379	658307-658751	666647-667776	2447-3991	1856966-1858557	71298-72650	-	-	-
IT551	16	1685399-1686839	-	-	386817-387612	-	2069258-2069990	2552620-2552899	-	387704-388247	388243-389074	2454192-2454852	2452840-2454196	-	-	-	679854-681861	678780-679754	1482229-1483584	1481703-1482123	1066120-1066564	1539423-1540552	-	2225260-2225388	587585-588937	-	-	-
IT552	16	1844000-1845440	-	-	1325578-1326373	-	163600-164332	2028839-2029118	-	1324943-1325486	1324116-1324947	485729-486389	486385-487741	-	-	-	863798-865805	862724-863698	1793039-1794394	1794500-1794920	1573419-1573863	1741461-1742590	-	2604181-2605918	2629536-2630888	-	-	-
IT553	18	1744490-1745930	-	-	1570763-1571558	-	1129287-1130019	1404983-1405262	7736-8582	1571650-1572193	1572189-1573020	408207-408867	406855-408211	-	-	-	1879693-1881700	1878619-1879593	2147480-2148835	2146954-2147374	355842-356286	590787-591916	14042-15586	579490-581227	1787560-1788912	-	-	-
IT554	18	2798590-2800030	-	-	2781760-2782555	-	1825551-1826283	2412361-2412640	3427-4273	2781125-2781668	2780298-2781129	1562429-1563089	1561077-1562433	-	-	-	115440-117447	117547-118521	437192-438547	436666-437086	795517-795961	803865-804994	9733-11277	2061144-2062881	208497-209849	-	-	-
IT555	18	2827408-2828848	-	-	2798129-2798924	-	1681000-1681732	2353270-2353549	3417-4263	2797494-2798037	2796667-2797498	1418393-1419053	1417041-1418397	-	-	-	41437-43444	43544-44518	363015-364370	362489-362909	721341-721785	729669-730798	9723-11267	1915497-1917234	134442-135794	-	-	-
IT556	18	2777828-2779268	-	-	2767621-2768416	-	1603901-1604633	2252264-2252543	2747061-2747907	2768508-2769051	2769047-2769878	1341218-1341878	1339866-1341222	-	-	-	3698-5705	5805-6779	297285-298640	296759-297179	655897-656341	664233-665362	2740057-2741601	1824758-1826495	66947-68299	-	-	-
IT557	18	2591226-2592666	-	-	2261415-2262210	-	641013-641745	201341-201620	473646-474492	2262302-2262833	2262829-2263660	2436598-2437258	2437254-2438610	-	-	-	2715560-2717567	2714486-2715460	1700123-1701478	1701584-1702004	1878426-1878870	2164006-2165135	466642-468186	1794087-1795824	2623145-2624497	-	-	-
IT558	18	1895337-1896777	-	-	1890114-1890909	-	405518-406250	2212494-2212773	1042252-1043098	1889479-1890022	1888652-1889483	2516570-2517230	2515218-2516574	-	-	-	1636523-1638530	1635449-1636423	2707237-2708592	2708698-2709118	1830194-1830638	1509799-1510928	1035248-1036792	1914383-1916120	1544151-1545503	-	-	-
IT559	18	2879323-2880763	-	-	2825135-2825930	-	2793820-2794552	2223208-2223487	3552-4398	2826022-2826565	2826561-2827392	1300875-1301535	1299523-1300879	-	-	-	2681015-2683022	2683122-2684096	242102-243457	241576-241996	599653-600097	608001-609130	9858-11402	1791731-1793322	2773862-2775214	-	-	-
IT563	17	1754479-1755919	-	-	600997-601792	-	-	1935942-1936221	70748-71594	601884-602427	602423-603254	1248566-1249226	1247214-1248570	-	-	-	2617631-2619638	2616557-2617531	1044890-1046245	1046351-1046771	1629086-1629530	1955598-1956727	63744-65288	1311927-1313664	2525013-2526365	-	-	-
IT564	18	2831983-2833423	-	-	2837267-2838062	-	1568626-1569358	2233387-2233666	3421-4267	2836632-2837175	2835805-2836636	1305944-1306604	1304592-1305948	-	-	-	2691183-2693190	2693290-2694264	241460-242815	240934-241354	599477-599921	607809-608938	9727-11271	1804876-1806467	2783819-2785171	-	-	-
IT565	18	2161868-2163308	-	-	2261291-2262086	-	1590762-1591494	2102345-2102624	1765837-1766683	2262178-2262721	2262717-2263548	892788-893448	891436-892792	-	-	-	1870975-1872982	1873082-1874056	2409875-2411230	2411336-2411756	2201403-2201847	298867-299996	1758833-1760377	1319602-1321339	1963648-1965000	-	-	-
IT566	18	2213075-2214515	-	-	1971557-1972352	-	596567-597299	860485-860764	1995699-1996545	1970922-1971465	1970095-1970926	1810665-1811325	1811321-1812677	-	-	-	1561065-1563072	1563172-1564146	2662842-2664197	2664303-2664723	2133546-2133990	2448859-2449988	2002005-2003549	2711721-2713458	1654239-1655591	-	-	-
IT567	18	2719924-2721364	-	-	1973104-1973899	-	1012473-1013205	1227175-1227454	3425-4271	1972469-1973012	1971642-1972473	2080638-2081298	2081294-2082649	-	-	-	1832155-1834162	1834262-1835236	202046-203401	203507-203927	100095-100539	2487888-2489017	9731-11275	1501836-1501964	1557806-1559158	-	-	-
IT568	18	2842105-2843545	-	-	2834243-2835038	-	1566193-1566925	2229500-2229779	3427-4273	2835130-2835673	2835669-2836500	1303399-1304059	1302048-1303403	-	-	-	2687309-2689316	2689416-2690390	241770-243125	241244-241664	599106-599550	607454-608583	9733-11277	1800493-1802084	2780030-2781382	-	-	-
IT569	14	2811933-2813373	-	-	-	-	1522596-1523328	2171536-2171815	2444538-2445384	-	-	1259602-1260262	1258250-1259606	-	-	-	2634553-2636560	2636660-2637634	218194-219549	217668-218088	562718-563162	571076-572205	-	1744348-1746085	2727519-2728871	-	-	-
IT570	16	2797897-2799337	-	-	2802870-2803665	-	1656121-1656853	2350522-2350801	-	2803757-2804300	2804296-2805127	1393462-1394122	1392110-1393466	-	-	-	15427-17434	17534-18508	336872-338227	336346-336766	694758-695202	703113-704242	-	1890566-1892157	108418-109770	-	-	-
IT571	18	2340969-2342409	-	-	2854740-2855535	-	620307-621039	176969-177248	915206-916052	2854105-2854648	2853278-2854109	1753613-1754273	1754269-1755625	-	-	-	1426862-1428869	1425788-1426762	2637820-2639175	2639281-2639701	2127707-2128151	2227883-2229012	908202-909746	2444976-2446567	1334531-1335883	-	-	-
IT572	17	2834695-2836135	-	-	2840001-2840796	-	-	2335111-2335390	3433-4279	2839366-2839909	2838539-2839370	1400134-1400794	1398782-1400138	-	-	-	15313-17320	17420-18394	338516-339871	337990-338410	697749-698193	706106-707235	9739-11283	1892012-1893749	98376-99728	-	-	-
IT573	19	2895345-2896785	-	-	2869704-2870499	-	1723363-1724095	2386733-2387012	3429-4275	2870591-2871134	2871130-2871961	1460591-1461251	1459239-1460595	2876075-2876723	-	-	2844672-2846679	2846779-2847753	370215-371570	369689-370109	727676-728120	736028-737157	9735-11279	1958101-1959838	95856-97208	-	-	-
IT574	18	2558811-2560251	-	-	2162877-2163672	-	1278506-1279238	535198-535477	718078-718924	2162242-2162785	2161415-2162246	1656862-1657522	1655510-1656866	-	-	-	999523-1001530	1001630-1002604	2294809-2296164	2294283-2294703	73888-74332	2345284-2346413	724384-725928	2725905-2727642	1091746-1093098	-	-	-
IT701	18	2695518-2696958	-	-	2366162-2366957	-	341969-342701	1174268-1174547	501616-502462	2367049-2367592	2367588-2368419	1516462-1517122	1517118-1518474	-	-	-	2260231-2262238	2262338-2263312	2610468-2611823	2611929-2612349	1235008-1235452	525376-526505	507922-509466	1345397-1347134	2352893-2354245	-	-	-
IT702	19	2790098-2791538	-	-	2178084-2178879	-	372835-373567	1556133-1556412	946752-947598	2177449-2177992	2176622-2177453	2463296-2463956	2463952-2465308	746011-746659	-	-	1838613-1840620	1840720-1841694	2311518-2312873	2310992-2311412	925177-925621	2037938-2039067	953058-954602	40228-41965	1931670-1933022	-	-	-
IT703	15	2318334-2319774	-	-	-	-	561318-562050	2483159-2483438	327327-328173	-	-	1649580-1650240	1648228-1649584	-	-	-	1163287-1165294	1165394-1166368	2737623-2738978	2737097-2737517	195296-195740	2143101-2144230	320323-321867	2327641-2329378	1256332-1257684	-	-	-
IT704	18	2885473-2886913	-	-	2868766-2869561	-	1598944-1599676	2248638-2248917	3433-4279	2868131-2868674	2867304-2868135	1335610-1336270	1334258-1335614	-	-	-	2706465-2708472	2708572-2709546	274103-275458	273577-273997	633323-633767	641826-642955	9739-11283	1820924-1822661	2799511-2800863	-	-	-
IT705	15	2384945-2386385	-	-	-	-	2619984-2620716	210314-210593	1638884-1639730	-	-	1881278-1881938	1879926-1881282	-	-	-	1330607-1332614	1329533-1330507	2279316-2280671	2280777-2281197	607314-607758	1165903-1167032	397784-399328	405642-407379	2102465-2103817	-	-	-
IT707	18	1818064-1819504	-	-	2710120-2710915	-	831282-832014	2035733-2036012	1034157-1035003	2711007-2711550	2711546-2712377	1160628-1161288	1161284-1162640	-	-	-	2520400-2522407	2519326-2520300	166557-167912	166031-166451	362504-362948	1548443-1549572	1027153-1028697	2792576-2794313	2428124-2429476	-	-	-
IT708	18	2622641-2624081	-	-	2611378-2612173	-	1047646-1048378	1478724-1479003	305245-306091	2610743-2611286	2609916-2610747	218205-218865	218861-219956	-	-	-	2384478-2386485	2386585-2387559	2098753-2100108	2100214-2100634	2201891-2202335	1645232-1646361	298241-299785	890879-892616	2414781-2416133	-	-	-
IT709	18	1619500-1620940	-	-	1537119-1537914	-	528668-529400	65546-65825	907728-908574	1536484-1537027	1535657-1536488	2509202-2509862	2507850-2509206	-	-	-	1003543-1005550	1005650-1006624	2209930-2211285	2209404-2209824	1717922-1718366	2267997-2269126	914034-915578	1627006-1628597	1096532-1097884	-	-	-
IT710	18	2532540-2533980	-	-	1732160-1732955	-	543952-544684	1192492-1192771	318114-318960	1733047-1733590	1733586-1734417	1585246-1585906	1583894-1585250	-	-	-	1941054-1943061	1943161-1944135	2448528-2449883	2449989-2450409	2230891-2231335	2159865-2160994	324420-325964	2713010-2714747	2034139-2035491	-	-	-
IT711	18	2595001-2596441	-	-	2365643-2366438	-	176239-176971	675138-675417	1763535-1764381	2366530-2367073	2367069-2367900	951372-952032	950020-951376	-	-	-	1375017-1377024	1377124-1378098	2417366-2418721	2418827-2419247	1540973-1541417	2216509-2217638	1756531-1758075	1647025-1648762	1467991-1469343	-	-	-
IT712	18	2845633-2847073	-	-	2810606-2811401	-	1667895-1668627	2311407-2311686	3433-4279	2809983-2810514	2809156-2809987	1408742-1409402	1407390-1408746	-	-	-	27180-29187	29287-30261	350845-352200	350319-350739	708206-708650	716566-717695	9739-11283	1887349-1889086	120209-121561	-	-	-
La001	15	2845489-2846929	-	-	-	-	2839451-2840183	2324580-2324859	3397-4243	-	-	1445720-1446380	1446376-1447732	-	-	-	25719-27726	27826-28800	346789-348144	346263-346683	702597-703041	710885-712014	9703-11247	953295-955032	118525-119877	-	-	-
La002	15	2755186-2756626	-	-	-	-	2744341-2745073	2230690-2230969	3421-4267	-	-	1349723-1350383	1350379-1351735	-	-	-	2689978-2691985	2692085-2693059	252806-254161	252280-252700	611381-611825	619717-620846	9727-11271	858366-860103	95687-97039	-	-	-
La003	15	2836131-2837571	-	-	-	-	2800752-2801484	1066492-1066771	3421-4267	-	-	2206356-2207016	2207012-2208368	-	-	-	1524189-1526196	1526296-1527270	283142-284497	282616-283036	641115-641559	649451-650580	9727-11271	1713374-1715111	54527-55879	-	-	-
La004	15	2838708-2840148	-	-	-	-	1668896-1669628	2327205-2327484	26168-27014	-	-	1406094-1406754	1404742-1406098	-	-	-	2688-4695	4795-5769	348022-349377	347496-347916	705982-706426	714318-715447	32474-34018	1904472-1906209	118434-119786	-	-	-
La005	18	2864195-2865635	-	-	2859569-2860364	-	1700692-1701424	2359808-2360087	3417-4263	2858934-2859477	2858107-2858938	1439917-1440577	1438565-1439921	-	-	-	25992-27999	28099-29073	351360-352715	350834-351254	709470-709914	717798-718927	9723-11267	1936468-1938205	119035-120387	-	-	-
La006	15	2846085-2847525	-	-	-	-	2817937-2818669	2318945-2319224	3427-4273	-	-	1406598-1407258	1405246-1406602	-	-	-	25982-27989	28089-29063	348056-349411	347530-347950	706164-706608	714512-715641	9733-11277	1897398-1899135	119162-120514	-	-	-
La008	15	2848217-2849657	-	-	-	-	2791891-2792623	2321303-2321582	3415-4261	-	-	1401257-1401917	1399905-1401261	-	-	-	25773-27780	27880-28854	346770-348125	346244-346664	704616-705060	712940-714069	9721-11265	1896419-1898156	118176-119528	-	-	-
La009	15	2830018-2831458	-	-	-	-	2799943-2800675	2328266-2328545	3423-4269	-	-	1406605-1407265	1405253-1406609	-	-	-	25970-27977	28077-29051	347644-348999	347118-347538	706030-706474	714370-715499	9729-11273	1899991-1901728	119117-120469	-	-	-
La010	15	2843624-2845064	-	-	-	-	2806502-2807234	2318262-2318541	3423-4269	-	-	1402172-1402832	1400820-1402176	-	-	-	25970-27977	28077-29051	347800-349155	347274-347694	705809-706253	714149-715278	9729-11273	1896043-1897780	119130-120482	-	-	-
La011	15	2852702-2854142	-	-	-	-	2818185-2818917	2351041-2351320	3421-4267	-	-	1406780-1407440	1405428-1406784	-	-	-	25964-27971	28071-29045	348624-349979	348098-348518	706597-707041	714933-716062	9727-11271	1898064-1899801	119022-120374	-	-	-
La012	15	2874265-2875705	-	-	-	-	2812429-2813161	2318561-2318840	26174-27020	-	-	1401690-1402350	1400338-1401694	-	-	-	2690-4697	4797-5771	346945-348300	346419-346839	705024-705468	713364-714493	32480-34024	1895660-1897397	118525-119877	-	-	-
La013	15	2827913-2829353	-	-	-	-	2817811-2818543	2314979-2315258	3415-4261	-	-	1402183-1402843	1400831-1402187	-	-	-	22538-24545	24645-25619	344173-345528	343647-344067	702163-702607	710487-711616	9721-11265	1892438-1894175	115699-117051	-	-	-
La014	15	2854141-2855581	-	-	-	-	2848336-2849068	2350316-2350595	3427-4273	-	-	1405382-1406042	1404030-1405386	-	-	-	25982-27989	28089-29063	347032-348387	346506-346926	705179-705623	713591-714720	9733-11277	1896061-1897798	118465-119817	-	-	-
La015	15	2864003-2865443	-	-	-	-	2850183-2850915	2208230-2208509	3421-4267	-	-	1296218-1296878	1294866-1296222	-	-	-	2667187-2669194	2669294-2670268	237877-239232	237351-237771	595981-596425	604317-605446	9727-11271	1786808-1788545	2760244-2761596	-	-	-
La016	15	2828853-2830293	-	-	-	-	2811690-2812422	2316954-2317233	26156-27002	-	-	1398077-1398737	1396725-1398081	-	-	-	2684-4691	4791-5765	343589-344944	343063-343483	701723-702167	710051-711180	32462-34006	1894396-1896133	115208-116560	-	-	-
La017	15	2861116-2862556	-	-	-	-	2845072-2845804	1127564-1127843	3421-4267	-	-	2195511-2196171	2196167-2197523	-	-	-	22556-24563	24663-25637	344471-345826	343945-344365	702496-702940	710832-711961	9727-11271	1705189-1706926	115833-117185	-	-	-
La018	15	2847151-2848591	-	-	-	-	2818459-2819191	2301496-2301775	2761078-2761924	-	-	1382474-1383134	1381122-1382478	-	-	-	2682-4689	4789-5763	324532-325887	324006-324426	682395-682839	690719-691848	2767384-2768928	1873006-1874743	96064-97416	-	-	-
La019	15	2859483-2860923	-	-	-	-	2827268-2828000	2320874-2321153	3427-4273	-	-	1406147-1406807	1404795-1406151	-	-	-	25982-27989	28089-29063	347624-348979	347098-347518	705704-706148	714052-715181	9733-11277	1896950-1898687	119040-120392	-	-	-
La020	15	2859517-2860957	-	-	-	-	2786421-2787153	2327675-2327954	3423-4269	-	-	1404842-1405502	1403490-1404846	-	-	-	22562-24569	24669-25643	344263-345618	343737-344157	702270-702714	710610-711739	9729-11273	1894692-1896429	115843-117195	-	-	-
La021	15	2848077-2849517	-	-	-	-	2821507-2822239	2317363-2317642	3425-4271	-	-	1406215-1406875	1404863-1406219	-	-	-	25976-27983	28083-29057	347749-349104	347223-347643	705784-706228	714128-715257	9731-11275	1896469-1898206	119158-120510	-	-	-
La022	15	2809028-2810468	-	-	-	-	2817312-2818044	2320180-2320459	3427-4273	-	-	1407171-1407831	1405819-1407175	-	-	-	25982-27989	28089-29063	347511-348866	346985-347405	706356-706800	714704-715833	9733-11277	1897911-1899648	118969-120321	-	-	-
La023	15	2762118-2763558	-	-	-	-	2754401-2755133	2249029-2249308	3429-4275	-	-	1335965-1336625	1334613-1335969	-	-	-	25988-27995	28095-29069	276532-277887	276006-276426	634885-635329	643237-644366	9735-11279	1826847-1828584	119148-120500	-	-	-
La024	15	2805860-2807300	-	-	-	-	2749402-2750134	2249372-2249651	3425-4271	-	-	1335406-1336066	1334054-1335410	-	-	-	25976-27983	28083-29057	276393-277748	275867-276287	634678-635122	643022-644151	9731-11275	1826240-1827977	119033-120385	-	-	-
La025	15	2864392-2865832	-	-	-	-	2785646-2786378	2322763-2323042	3411-4257	-	-	1404726-1405386	1403374-1404730	-	-	-	25933-27940	28040-29014	346543-347898	346017-346437	704642-705086	712958-714087	9717-11261	1891940-1893677	118116-119468	-	-	-
La026	15	2826388-2827645	-	-	-	-	2792848-2793580	2298123-2298402	2841849-2842338	-	-	1361741-1362401	1360389-1361745	-	-	-	2761875-2763882	2763982-2764956	302491-303846	301965-302385	661576-662020	669936-671065	2813959-2815503	1852843-1854580	73121-74473	-	-	-
La027	15	2838331-2839771	-	-	-	-	2816288-2817020	2320859-2321138	3421-4267	-	-	1406558-1407218	1405206-1406562	-	-	-	25964-27971	28071-29045	347453-348808	346927-347347	705718-706162	714054-715183	9727-11271	1898018-1899755	118905-120257	-	-	-
La028	15	2831940-2833380	-	-	-	-	2824270-2825002	2306880-2307159	3427-4273	-	-	1394766-1395426	1393414-1394770	-	-	-	14384-16391	16491-17465	335873-337228	335347-335767	694011-694455	702359-703488	9733-11277	1884962-1886699	107358-108710	-	-	-
La029	15	2847087-2848527	-	-	-	-	2807926-2808658	2296442-2296721	3421-4267	-	-	1383133-1383793	1381781-1383137	-	-	-	2753518-2755525	2755625-2756599	324241-325596	323715-324135	682506-682950	690842-691971	9727-11271	1874461-1876198	95681-97033	-	-	-
La030	15	2817094-2818534	-	-	-	-	2831805-2832537	2342424-2342703	3415-4261	-	-	1403500-1404160	1402148-1403504	-	-	-	25946-27953	28053-29027	347304-348659	346778-347198	703025-703469	711349-712478	9721-11265	1895215-1896952	118932-120284	-	-	-
La031	15	2821060-2822500	-	-	-	-	2810031-2810763	2320100-2320379	3423-4269	-	-	1406299-1406959	1404947-1406303	-	-	-	25970-27977	28077-29051	347376-348731	346850-347270	705677-706121	714017-715146	9729-11273	1897331-1899068	118956-120308	-	-	-
La032	15	2829031-2830471	-	-	-	-	2818432-2819164	2297714-2297993	3423-4269	-	-	1383376-1384036	1382024-1383380	-	-	-	2754818-2756825	2756925-2757899	324195-325550	323669-324089	682585-683029	690925-692054	9729-11273	1874339-1876076	95775-97127	-	-	-
La033	13	2838678-2840118	-	-	-	-	2833759-2834491	2272021-2272300	-	-	-	1359511-1360171	1358159-1359515	-	-	-	2729703-2731710	2731810-2732784	300644-301999	300118-300538	658637-659081	667453-668582	-	1850382-1852119	72225-73577	-	-	-
La034	15	2879959-2881399	-	-	-	-	2829139-2829871	2328592-2328871	3421-4267	-	-	1408232-1408892	1406880-1408236	-	-	-	25964-27971	28071-29045	348013-349368	347487-347907	707205-707649	715605-716734	9727-11271	1901265-1903002	119230-120582	-	-	-
La035	15	2840521-2841961	-	-	-	-	2818866-2819598	2319786-2320065	3425-4271	-	-	1406606-1407266	1405254-1406610	-	-	-	25976-27983	28083-29057	347557-348912	347031-347451	705894-706338	714238-715367	9731-11275	1897224-1898961	118962-120314	-	-	-
La036	15	2869194-2870634	-	-	-	-	2848592-2849324	2325683-2325962	3427-4273	-	-	1406715-1407375	1405363-1406719	-	-	-	25936-27943	28043-29017	347626-348981	347100-347520	706073-706517	714421-715550	9733-11277	1896814-1898551	118922-120274	-	-	-
La037	15	2851612-2853052	-	-	-	-	1926910-1927642	1149761-1150040	15849-16695	-	-	2189899-2190559	2190555-2191911	-	-	-	48413-50420	50520-51494	365886-367241	365360-365780	724291-724735	732630-733759	22155-23699	1706743-1708480	140590-141942	-	-	-
La038	15	2832819-2834259	-	-	-	-	2840550-2841282	2319984-2320263	3423-4269	-	-	1406337-1406997	1404985-1406341	-	-	-	25970-27977	28077-29051	347541-348896	347015-347435	705450-705894	713790-714919	9729-11273	1896704-1898441	118637-119989	-	-	-
La039	15	2790223-2791663	-	-	-	-	2814395-2815127	2329042-2329321	3423-4269	-	-	1406739-1407399	1405387-1406743	-	-	-	25797-27804	27904-28878	347414-348769	346888-347308	705886-706330	714226-715355	9729-11273	1881911-1883648	118873-120225	-	-	-
La041	15	2848899-2850339	-	-	-	-	2804594-2805326	2322015-2322294	3417-4263	-	-	1405903-1406563	1404551-1405907	-	-	-	25952-27959	28059-29033	347276-348631	346750-347170	705300-705744	713628-714757	9723-11267	1896094-1897831	118832-120184	-	-	-
La042	13	2853662-2855102	-	-	-	-	1672057-1672789	2308682-2308961	-	-	-	1409524-1410184	1408172-1409528	-	-	-	2692-4699	4799-5773	324368-325723	323842-324262	708574-709018	716918-718047	-	1906653-1908390	95749-97101	-	-	-
La043	15	2823549-2824989	-	-	-	-	2809646-2810378	2319430-2319709	3538-4384	-	-	1405758-1406418	1404406-1405762	-	-	-	26145-28152	28252-29226	347561-348916	347035-347455	705215-705659	713535-714664	9844-11388	1897979-1899716	119201-120553	-	-	-
La044	13	2803774-2805214	-	-	-	-	2809528-2810260	2303487-2303766	-	-	-	1356677-1357337	1355325-1356681	-	-	-	2760620-2762627	2762727-2763701	300766-302121	300240-300660	659255-659699	668451-668682	-	1847194-1848931	72419-73771	-	-	-
La045	15	2851027-2852467	-	-	-	-	2780253-2780985	2314321-2314600	3423-4269	-	-	1433632-1434292	1434288-1435644	-	-	-	17694-19701	19801-20775	338048-339403	337522-337942	696055-696499	704395-705524	9729-11273	942224-943961	109516-110868	-	-	-
La046	15	2826634-2828074	-	-	-	-	2819729-2820461	2345367-2345646	3423-4269	-	-	1406630-1407290	1405278-1406634	-	-	-	25931-27938	28038-29012	347585-348940	347059-347479	705484-705928	713824-714953	9729-11273	1897241-1898978	118988-120340	-	-	-
La047	15	2860520-2861960	-	-	-	-	2807988-2808720	2319821-2320100	3540-4386	-	-	1426602-1427262	1425250-1426606	-	-	-	26032-28039	28139-29113	347749-349104	347223-347643	725883-726327	734207-735336	9846-11390	1918423-1920160	119240-120592	-	-	-
La048	15	2846532-2847972	-	-	-	-	2834675-2835407	1130555-1130834	3548-4394	-	-	2198384-2199044	2199040-2200396	-	-	-	26056-28063	28163-29137	347171-348526	346645-347065	705262-705706	713602-714731	9854-11398	1706620-1708357	118530-119882	-	-	-
La049	15	2840018-2841458	-	-	-	-	2803390-2804122	1130173-1130452	25921-26767	-	-	2195946-2196606	2196602-2197958	-	-	-	2568-4575	4675-5649	346964-348319	346438-346858	704901-705345	713237-714366	32227-33771	1704283-1706020	118406-119758	-	-	-
La050	15	2830184-2831624	-	-	-	-	2824381-2825113	1131089-1131368	3550-4396	-	-	2199161-2199821	2199817-2201173	-	-	-	26062-28069	28169-29143	347833-349188	347307-347727	705768-706212	714112-715241	9856-11400	1707451-1709188	119227-120579	-	-	-
La051	15	2841807-2843247	-	-	-	-	2792202-2792934	2311250-2311529	3548-4394	-	-	1393238-1393898	1391886-1393242	-	-	-	14048-16055	16155-17129	335187-336542	334661-335081	692180-692624	700520-701649	9854-11398	1884065-1885802	106593-107945	-	-	-
La052	15	2869416-2870856	-	-	-	-	2817271-2818003	2304569-2304848	3552-4398	-	-	1391602-1392262	1390250-1391606	-	-	-	11017-13024	13124-14098	332518-333873	331992-332412	690562-691006	698910-700039	2807521-2809065	1882685-1884422	104074-105426	-	-	-
La053	15	2832508-2833948	-	-	-	-	2820489-2821221	2318924-2319203	3544-4390	-	-	1405517-1406177	1404165-1405521	-	-	-	26044-28051	28151-29125	346972-348327	346446-346866	704882-705326	713214-714343	9850-11394	1896005-1897742	118510-119862	-	-	-
La054	15	2912066-2913506	-	-	-	-	2810598-2811330	2348162-2348441	3425-4271	-	-	1405851-1406511	1404499-1405855	-	-	-	25679-27686	27786-28760	346751-348106	346225-346645	704833-705277	713177-714306	9731-11275	1896552-1898289	118157-119509	-	-	-
La055	15	2815009-2816449	-	-	-	-	2821503-2822235	2321242-2321521	3552-4398	-	-	1407403-1408063	1406051-1407407	-	-	-	26068-28075	28175-29149	347704-349059	347178-347598	706298-706742	714646-715775	9858-11402	1898236-1899973	119125-120477	-	-	-
La057	15	2867892-2869332	-	-	-	-	2817133-2817865	2319907-2320186	26197-27043	-	-	1406100-1406760	1404748-1406104	-	-	-	2576-4583	4683-5657	347067-348422	346541-346961	705074-705518	713426-714555	32503-34047	1897020-1898757	118560-119912	-	-	-
La058	15	2820784-2822224	-	-	-	-	2813230-2813962	2323077-2323356	3546-4392	-	-	1407676-1408336	1406324-1407680	-	-	-	26050-28057	28157-29131	348659-350014	348133-348553	706509-706953	714845-715974	9852-11396	1899673-1901410	119107-120459	-	-	-
La059	15	2827322-2828762	-	-	-	-	2820073-2820805	1131074-1131353	26553-27399	-	-	2196506-2197166	2197162-2198518	-	-	-	3082-5089	5189-6163	347486-348841	346960-347380	705877-706321	714205-715334	32859-34403	1704910-1706647	119030-120382	-	-	-
La060	15	2841555-2842995	-	-	-	-	2817358-2818090	2320243-2320522	3548-4394	-	-	1406308-1406968	1404956-1406312	-	-	-	26056-28063	28163-29137	347655-349010	347129-347549	705554-705998	713894-715023	9854-11398	1897069-1898806	119235-120587	-	-	-
La061	15	2826908-2828348	-	-	-	-	2819624-2820356	2350106-2350385	3546-4392	-	-	1406491-1407151	1405139-1406495	-	-	-	26050-28057	28157-29131	348133-349488	347607-348027	706127-706571	714463-715592	9852-11396	1897188-1898925	118520-119872	-	-	-
La062	15	2857463-2858903	-	-	-	-	2829463-2830195	2216448-2216727	3417-4263	-	-	1297775-1298435	1296423-1297779	-	-	-	2673813-2675820	2675920-2676894	241845-243200	241319-241739	599644-600088	607972-609101	9723-11267	1813760-1815497	2766793-2768145	-	-	-
La063	15	2867567-2869007	-	-	-	-	2785313-2786045	2312335-2312614	3548-4394	-	-	1414683-1415343	1413331-1414687	-	-	-	14249-16256	16356-17330	335254-336609	334728-335148	713742-714186	722082-723211	9854-11398	1905565-1907302	106805-108157	-	-	-
La065	16	2862217-2863657	-	-	-	-	2816810-2817542	2304802-2305081	2764485-2765331	-	-	1388652-1389312	1387300-1388656	-	-	-	7543-9550	9650-10624	328273-329628	327747-328167	687071-687515	695497-696626	2770791-2772335	1878856-1880593	99708-101060	-	-	-
La066	15	2842741-2844181	-	-	-	-	2810038-2810770	2319852-2320131	3546-4392	-	-	1406127-1406787	1404775-1406131	-	-	-	26050-28057	28157-29131	347515-348870	346989-347409	705365-705809	713701-714830	9852-11396	1898412-1900149	119107-120459	-	-	-
La067	15	2851738-2853178	-	-	-	-	2814497-2815229	2319599-2319878	3548-4394	-	-	1405851-1406511	1404499-1405855	-	-	-	26056-28063	28163-29137	346950-348305	346424-346844	704849-705293	713189-714318	9854-11398	1896308-1898045	118530-119882	-	-	-
La068	15	2825896-2827336	-	-	-	-	2815005-2815737	2325365-2325644	3558-4404	-	-	1408991-1409651	1407639-1408995	-	-	-	26086-28093	28193-29167	348320-349675	347794-348214	706664-707108	715024-716153	9864-11408	1900468-1902205	118580-119932	-	-	-
La069	15	2824189-2825629	-	-	-	-	2813842-2814574	2326962-2327241	15496-16342	-	-	1402128-1402788	1400776-1402132	-	-	-	25804-27811	27911-28885	347361-348716	346835-347255	705223-705667	713559-714688	21802-23346	1897253-1898990	118861-120213	-	-	-
La070	15	2834288-2835728	-	-	-	-	2813320-2814052	2323733-2324012	3552-4398	-	-	1407696-1408356	1406344-1407700	-	-	-	26068-28075	28175-29149	348985-350340	348459-348879	707092-707536	715440-716569	9858-11402	1898693-1900430	119351-120703	-	-	-
La071	15	2881683-2883123	-	-	-	-	2838783-2839515	2320214-2320493	3421-4267	-	-	1397023-1397683	1395671-1397027	-	-	-	25798-27805	27905-28879	347635-348990	347109-347529	705753-706197	714089-715218	9727-11271	1888947-1890684	119106-120458	-	-	-
La072	15	2868181-2869621	-	-	-	-	2821486-2822218	2322752-2323031	26179-27025	-	-	1403294-1403954	1401942-1403298	-	-	-	2570-4577	4677-5651	346950-348305	346424-346844	704849-705293	713189-714318	32485-34029	1897998-1899735	118530-119882	-	-	-
La073	15	2803639-2805079	-	-	-	-	2820573-2821305	1125660-1125939	2812793-2813639	-	-	2195081-2195741	2195737-2197093	-	-	-	20921-22928	23028-24002	342487-343842	341961-342381	700505-700949	708845-709974	4719-6263	1703024-1704761	114066-115418	-	-	-
La074	15	2859491-2860931	-	-	-	-	2845163-2845895	2326157-2326436	3552-4398	-	-	1407762-1408422	1406410-1407766	-	-	-	25941-27948	28048-29022	348752-350107	348226-348646	706685-707129	715033-716162	9858-11402	1897860-1899597	119109-120461	-	-	-
La075	15	2816810-2818250	-	-	-	-	2811413-2812145	2320260-2320539	3540-4386	-	-	1402173-1402833	1400821-1402177	-	-	-	26032-28039	28139-29113	347548-348903	347022-347442	705286-705730	713610-714739	9846-11390	1897673-1899410	119089-120441	-	-	-
La076	15	2826146-2827586	-	-	-	-	2787649-2788381	2308047-2308326	3552-4398	-	-	1406277-1406937	1404925-1406281	-	-	-	26068-28075	28175-29149	346994-348349	346468-346888	705161-705605	713509-714638	9858-11402	1881783-1883520	118550-119902	-	-	-
La077	15	2838117-2839557	-	-	-	-	2821628-2822360	2221145-2221424	4071-4917	-	-	1300239-1300899	1298887-1300243	-	-	-	2678630-2680637	2680737-2681711	241773-243128	241247-241667	599636-600080	607972-609101	10377-11921	1792383-1794120	2771687-2773039	-	-	-
La078	16	2871258-2872698	-	-	-	-	2845216-2845948	2324733-2325012	2783175-2784021	-	-	1382518-1383178	1381166-1382522	-	2862167-2862653	-	2574-4581	4681-5655	323423-324778	322897-323317	681394-681838	689742-690871	2789481-2791025	1876113-1877850	94979-96331	-	-	-
La079	15	2858322-2859762	-	-	-	-	2846651-2847383	2326543-2326822	2799989-2800835	-	-	1382203-1382863	1380851-1382207	-	-	-	2437-4444	4544-5518	323506-324861	322980-323400	681537-681981	689873-691002	2792985-2794529	1874019-1875756	94975-96327	-	-	-
La080	15	2888054-2889494	-	-	-	-	2842275-2843007	2296551-2296830	2839014-2839113	-	-	1383685-1384345	1382333-1383689	-	-	-	2576-4583	4683-5657	324505-325860	323979-324399	682572-683016	690924-692053	2796476-2798020	1874221-1875958	95736-97088	-	-	-
La081	15	2848759-2850199	-	-	-	-	2816002-2816734	2321155-2321434	3552-4398	-	-	1406347-1407007	1404995-1406351	-	-	-	26068-28075	28175-29149	347351-348706	346825-347245	705303-705747	713651-714780	9858-11402	1897543-1899280	117708-119060	-	-	-
La082	16	2839456-2840896	-	-	-	-	2833154-2833886	2326686-2326965	9678-10524	-	-	1405422-1406082	1404070-1405426	-	2860491-2860977	-	2560-4567	4667-5641	346979-348334	346453-346873	704862-705306	713182-714311	15984-17528	1897056-1898793	118451-119803	-	-	-
La083	15	2874812-2876252	-	-	-	-	2825998-2826730	2297249-2297528	2770814-2771660	-	-	1382754-1383414	1381402-1382758	-	-	-	2568-4575	4675-5649	324243-325598	323717-324137	682106-682550	690442-691571	2763810-2765354	1874575-1876312	95625-96977	-	-	-
La084	15	2879452-2880892	-	-	-	-	2821943-2822675	2323821-2324100	3425-4271	-	-	1405686-1406346	1404334-1405690	-	-	-	25810-27817	27917-28891	347423-348778	346897-347317	704862-705306	713206-714335	9731-11275	1896471-1898208	118991-120343	-	-	-
La085	15	2834093-2835533	-	-	-	-	2807228-2807960	2318646-2318925	3550-4396	-	-	1405985-1406645	1404633-1405989	-	-	-	26062-28069	28169-29143	347221-348576	346695-347115	705138-705582	713482-714611	9856-11400	1896290-1898027	118789-120141	-	-	-
La086	15	2888514-2889954	-	-	-	-	2811505-2812237	2347349-2347628	3421-4267	-	-	1403602-1404262	1402250-1403606	-	-	-	25798-27805	27905-28879	348673-350028	348147-348567	706536-706980	714872-716001	9727-11271	1898979-1900716	119060-120412	-	-	-
La087	15	2869884-2871324	-	-	-	-	2819018-2819750	2323236-2323515	26815-27661	-	-	1406790-1407450	1405438-1406794	-	-	-	2568-4575	4675-5649	347635-348990	347109-347529	706070-706514	714406-715535	33121-34665	1898409-1900146	119227-120579	-	-	-
La088	15	2831657-2833097	-	-	-	-	2806648-2807380	2317774-2318053	3554-4400	-	-	1404453-1405113	1403101-1404457	-	-	-	24385-26392	26492-27466	345459-346814	344933-345353	703440-703884	711792-712921	9860-11404	1894975-1896712	116871-118223	-	-	-
La089	15	2827912-2829352	-	-	-	-	2817447-2818179	2320413-2320692	26167-27013	-	-	1405962-1406622	1404610-1405966	-	-	-	2566-4573	4673-5647	347406-348761	346880-347300	705233-705677	713565-714694	32473-34017	1897776-1899513	118747-120099	-	-	-
La090	15	2830499-2831939	-	-	-	-	2825265-2825997	2303077-2303356	23560-24406	-	-	1396697-1397357	1395345-1396701	-	-	-	2539-4546	4646-5620	343836-345191	343310-343730	696226-696670	704521-705608	29866-31410	1882131-1883868	115563-116915	-	-	-
La091	15	2821433-2822873	-	-	-	-	2832598-2833330	2322108-2322387	26821-27667	-	-	1406664-1407324	1405312-1406668	-	-	-	2570-4577	4677-5651	347732-349087	347206-347626	705786-706230	714126-715255	33127-34671	1897013-1898750	119235-120587	-	-	-
La092	15	2833388-2834828	-	-	-	-	2814605-2815337	2321124-2321403	3552-4398	-	-	1407225-1407885	1405873-1407229	-	-	-	26068-28075	28175-29149	347822-349177	347296-347716	705793-706237	714141-715270	9858-11402	1898374-1900111	119378-120730	-	-	-
La093	15	2853901-2855341	-	-	-	-	2815808-2816540	2297835-2298114	2755745-2756591	-	-	1381406-1382066	1380054-1381410	-	-	-	2564-4571	4671-5645	323201-324556	322675-323095	680977-681421	689305-690434	2762051-2763595	1873032-1874769	94729-96081	-	-	-
La094	15	2856532-2857972	-	-	-	-	2816597-2817329	2215629-2215908	3423-4269	-	-	1301603-1302263	1300251-1301607	-	-	-	2673250-2675257	2675357-2676331	242988-244343	242462-242882	600886-601330	609226-610355	9729-11273	1792279-1794016	2766388-2767740	-	-	-
La095	15	2822928-2824368	-	-	-	-	2829000-2829732	2298852-2299131	3944-4790	-	-	1384447-1385107	1383095-1384451	-	-	-	2756469-2758476	2758576-2759550	325309-326664	324783-325203	683375-683819	691723-692852	10250-11794	1875637-1877374	96634-97986	-	-	-
La096	15	2864365-2865805	-	-	-	-	2814391-2815123	2321700-2321979	3554-4400	-	-	1406598-1407258	1405246-1406602	-	-	-	26074-28081	28181-29155	347715-349070	347189-347609	705717-706161	714069-715198	9860-11404	1896856-1898593	119259-120611	-	-	-
La097	15	2811144-2812584	-	-	-	-	2814076-2814808	2323306-2323585	3556-4402	-	-	1406447-1407107	1405095-1406451	-	-	-	26080-28087	28187-29161	347605-348960	347079-347499	705648-706092	714004-715133	9862-11406	1897362-1899099	119137-120489	-	-	-
La098	15	2858515-2859955	-	-	-	-	2813161-2813893	2310216-2310495	3552-4398	-	-	1395111-1395771	1393759-1395115	-	-	-	14167-16174	16274-17248	335668-337023	335142-335562	693955-694399	702303-703432	9858-11402	1885837-1887574	107224-108576	-	-	-
La099	16	2887172-2888612	-	-	-	-	2845704-2846436	2323070-2323349	9708-10554	-	-	1406168-1406828	1404816-1406172	-	2856474-2856960	-	2570-4577	4677-5651	347609-348964	347083-347503	705575-706019	713915-715044	16014-17558	1899358-1901095	118966-120318	-	-	-
La100	15	2866321-2867761	-	-	-	-	2847402-2848134	2319180-2319459	3558-4404	-	-	1406567-1407227	1405215-1406571	-	-	-	25959-27966	28066-29040	347628-348983	347102-347522	705706-706150	714066-715195	9864-11408	1897318-1899055	119148-120500	-	-	-
La101	15	2817317-2818757	-	-	-	-	2820245-2820977	2321496-2321775	3552-4398	-	-	1406668-1407328	1405316-1406672	-	-	-	26068-28075	28175-29149	347646-349001	347120-347540	705806-706250	714154-715283	9858-11402	1897189-1898926	119202-120554	-	-	-
La102	15	2834449-2835889	-	-	-	-	2811958-2812690	2323605-2323884	3554-4400	-	-	1406852-1407512	1405500-1406856	-	-	-	26074-28081	28181-29155	347870-349225	347344-347764	705877-706321	714229-715358	9860-11404	1897994-1899731	119336-120688	-	-	-
La103	15	2846292-2847732	-	-	-	-	2833647-2834379	2345522-2345801	3554-4400	-	-	1406734-1407394	1405382-1406738	-	-	-	26074-28081	28181-29155	347587-348942	347061-347481	705594-706038	713946-715075	9860-11404	1897592-1899329	119131-120483	-	-	-
La104	15	2838105-2839545	-	-	-	-	2832615-2833347	2321182-2321461	3558-4404	-	-	1406832-1407492	1405480-1406836	-	-	-	26086-28093	28193-29167	347713-349068	347187-347607	705792-706236	714152-715281	9864-11408	1897376-1899113	119233-120585	-	-	-
La105	15	2840056-2841496	-	-	-	-	2818134-2818866	2319464-2319743	3557-4403	-	-	1407001-1407661	1405649-1407005	-	-	-	26085-28092	28192-29166	347887-349242	347361-347781	705965-706409	714325-715454	9863-11407	1897470-1899207	119407-120759	-	-	-
La106	15	2839628-2841068	-	-	-	-	2816203-2816935	2318808-2319087	3554-4400	-	-	1406246-1406906	1404894-1406250	-	-	-	26074-28081	28181-29155	347155-348510	346629-347049	705162-705606	713514-714643	9860-11404	1897481-1899218	118560-119912	-	-	-
La107	15	2832417-2833857	-	-	-	-	2814707-2815439	2330438-2330717	3554-4400	-	-	1407909-1408569	1406557-1407913	-	-	-	26074-28081	28181-29155	347616-348971	347090-347510	705623-706067	713975-715104	9860-11404	1901240-1902977	118954-120306	-	-	-
La109	15	2816131-2817571	-	-	-	-	2823461-2824193	2299611-2299890	3552-4398	-	-	1384477-1385137	1383125-1384481	-	-	-	2757252-2759259	2759359-2760333	325270-326625	324744-325164	683423-683867	691771-692900	9858-11402	1875495-1877232	96826-98178	-	-	-
La110	15	2894084-2895524	-	-	-	-	2810669-2811401	2323011-2323290	9851-10697	-	-	1408325-1408985	1406973-1408329	-	-	-	2576-4583	4683-5657	348380-349735	347854-348274	706387-706831	714739-715868	16157-17701	1899180-1900917	118731-120083	-	-	-
La111	15	2842956-2844396	-	-	-	-	2810209-2810941	2212277-2212556	3423-4269	-	-	1300498-1301158	1299146-1300502	-	-	-	2669818-2671825	2671925-2672899	241830-243185	241304-241724	599828-600272	608168-609297	9729-11273	1790920-1792657	2762873-2764225	-	-	-
La112	15	2827281-2828721	-	-	-	-	2812034-2812766	2215741-2216020	50-896	-	-	1300372-1301032	1299020-1300376	-	-	-	2673403-2675410	2675510-2676484	241685-243040	241159-241579	599649-600093	607997-609126	6356-7900	1791813-1793550	2766460-2767812	-	-	-
La113	15	2809226-2810666	-	-	-	-	2817152-2817884	2322637-2322916	3558-4404	-	-	1407881-1408541	1406529-1407885	-	-	-	26086-28093	28193-29167	347623-348978	347097-347517	707036-707480	715396-716525	9864-11408	1898396-1900133	119143-120495	-	-	-
La114	15	2822061-2823501	-	-	-	-	2850832-2851564	2309062-2309341	3421-4267	-	-	1394535-1395195	1393183-1394539	-	-	-	14024-16031	16131-17105	335609-336964	335083-335503	693767-694211	702103-703232	9727-11271	1884857-1886594	107201-108553	-	-	-
La115	15	2840681-2842121	-	-	-	-	2808899-2809631	2321558-2321837	26896-27742	-	-	1406554-1407214	1405202-1406558	-	-	-	2576-4583	4683-5657	347809-349164	347283-347703	705811-706255	714163-715292	33202-34746	1897699-1899436	119355-120707	-	-	-
La116	15	2829308-2830748	-	-	-	-	2792690-2793422	2310866-2311145	3552-4398	-	-	1388998-1389658	1387646-1389002	-	-	-	9379-11386	11486-12460	330989-332344	330463-330883	689065-689509	697413-698542	2814097-2815641	1880104-1881841	102550-103902	-	-	-
La117	15	2843878-2845318	-	-	-	-	2816523-2817255	2246780-2247059	3552-4398	-	-	1301639-1302299	1300287-1301643	-	-	-	2704384-2706391	2706491-2707465	241809-243164	241283-241703	600446-600890	608794-609923	9858-11402	1792802-1794539	2797637-2798989	-	-	-
La118	15	2829286-2830726	-	-	-	-	2812412-2813144	2321796-2322075	3552-4398	-	-	1405705-1406365	1404353-1405709	-	-	-	26068-28075	28175-29149	346992-348347	346466-346886	704956-705400	713304-714433	9858-11402	1896874-1898611	118550-119902	-	-	-
La119	15	2864806-2866246	-	-	-	-	2810407-2811139	2321422-2321701	3554-4400	-	-	1406778-1407438	1405426-1406782	-	-	-	26074-28081	28181-29155	347587-348942	347061-347481	705594-706038	713946-715075	9860-11404	1899160-1900897	119131-120483	-	-	-
La120	15	2812370-2813810	-	-	-	-	2819606-2820338	1130587-1130866	3548-4394	-	-	2198892-2199552	2199548-2200904	-	-	-	26056-28063	28163-29137	347533-348888	347007-347427	705432-705876	713772-714901	9854-11398	1706848-1708585	119113-120465	-	-	-
La121	15	2854894-2856334	-	-	-	-	2829916-2830648	2324566-2324845	3558-4404	-	-	1406247-1406907	1404895-1406251	-	-	-	26086-28093	28193-29167	347694-349049	347168-347588	705334-705778	713694-714823	9864-11408	1897598-1899335	119080-120432	-	-	-
La122	15	2832387-2833827	-	-	-	-	2811079-2811811	2321277-2321556	3554-4400	-	-	1405909-1406569	1404557-1405913	-	-	-	26074-28081	28181-29155	347258-348613	346732-347152	705166-705610	713518-714647	9860-11404	1896537-1898274	118802-120154	-	-	-
La123	15	2851191-2852631	-	-	-	-	2811133-2811865	2319922-2320201	3554-4400	-	-	1406676-1407336	1405324-1406680	-	-	-	26074-28081	28181-29155	347587-348942	347061-347481	705594-706038	713946-715075	9860-11404	1897823-1899560	119131-120483	-	-	-
La124	15	2835199-2836639	-	-	-	-	2809765-2810497	2318920-2319199	26203-27049	-	-	1406010-1406670	1404658-1406014	-	-	-	2578-4585	4685-5659	347080-348435	346554-346974	705123-705567	713479-714608	32509-34053	1896581-1898318	118570-119922	-	-	-
La125	15	2840393-2841833	-	-	-	-	2817347-2818079	2215799-2216078	3556-4402	-	-	1300687-1301347	1299335-1300691	-	-	-	2673482-2675489	2675589-2676563	241833-243188	241307-241727	599875-600319	608231-609360	9862-11406	1794222-1795959	2766643-2767995	-	-	-
La126	15	2827621-2829061	-	-	-	-	2818203-2818935	2218114-2218393	3556-4402	-	-	1301148-1301808	1299796-1301152	-	-	-	2675795-2677802	2677902-2678876	241833-243188	241307-241727	600261-600705	608617-609746	9862-11406	1792225-1793962	2768949-2770301	-	-	-
La127	15	2831658-2833098	-	-	-	-	2793371-2794103	2330323-2330602	3556-4402	-	-	1405892-1406552	1404540-1405896	-	-	-	26080-28087	28187-29161	347038-348393	346512-346932	705081-705525	713437-714566	9862-11406	1896796-1898533	118570-119922	-	-	-
La128	15	2834203-2835643	-	-	-	-	2809360-2810092	2319269-2319548	3554-4400	-	-	1406482-1407142	1405130-1406486	-	-	-	26074-28081	28181-29155	347715-349070	347189-347609	705717-706161	714069-715198	9860-11404	1897333-1899070	119259-120611	-	-	-
La129	15	2820487-2821927	-	-	-	-	2814195-2814927	2328484-2328763	3554-4400	-	-	1407838-1408498	1406486-1407842	-	-	-	26074-28081	28181-29155	348794-350149	348268-348688	706904-707348	715319-716448	9860-11404	1898983-1900720	119153-120505	-	-	-
La130	15	2813927-2815367	-	-	-	-	2816863-2817595	2321945-2322224	3560-4406	-	-	1407362-1408022	1406010-1407366	-	-	-	26092-28099	28199-29173	347768-349123	347242-347662	705884-706328	714248-715377	9866-11410	1897995-1899732	119149-120501	-	-	-
La131	15	2828435-2829875	-	-	-	-	2819695-2820427	2216886-2217165	3425-4271	-	-	1301079-1301739	1299727-1301083	-	-	-	2674711-2676718	2676818-2677792	241821-243176	241295-241715	599864-600308	608216-609345	9731-11275	1791785-1793522	2767768-2769120	-	-	-
La132	15	2847282-2848722	-	-	-	-	2814369-2815101	2327513-2327792	3554-4400	-	-	1407013-1407673	1405661-1407017	-	-	-	26074-28081	28181-29155	347838-349193	347312-347732	705807-706251	714159-715288	9860-11404	1897712-1899449	119255-120607	-	-	-
La134	15	2859643-2861083	-	-	-	-	2811810-2812542	2302994-2303273	3944-4790	-	-	1387298-1387958	1385946-1387302	-	-	-	2760600-2762607	2762707-2763681	328017-329372	327491-327911	686172-686616	694532-695661	10250-11794	1878010-1879747	99537-100889	-	-	-
La135	15	2845917-2847357	-	-	-	-	2817735-2818467	2217462-2217741	3944-4790	-	-	1301330-1301990	1299978-1301334	-	-	-	2675087-2677094	2677194-2678168	241833-243188	241307-241727	599839-600283	608195-609324	10250-11794	1792683-1794420	2768246-2769598	-	-	-
La136	15	2820345-2821785	-	-	-	-	2828474-2829206	1130931-1131210	3552-4398	-	-	2199893-2200553	2200549-2201905	-	-	-	26068-28075	28175-29149	347569-348924	347043-347463	705615-706059	713963-715092	9858-11402	1707716-1709453	119125-120477	-	-	-
La137	15	2832973-2834413	-	-	-	-	2810975-2811707	2319845-2320124	3558-4404	-	-	1406721-1407381	1405369-1406725	-	-	-	26086-28093	28193-29167	347623-348978	347097-347517	705701-706145	714061-715190	9864-11408	1897346-1899083	119143-120495	-	-	-
La138	15	2869046-2870486	-	-	-	-	2839616-2840348	2322279-2322558	3556-4402	-	-	1406587-1407247	1405235-1406591	-	-	-	26080-28087	28187-29161	347805-349160	347279-347699	705845-706289	714201-715330	9862-11406	1897330-1899067	119337-120689	-	-	-
La139	15	2843491-2844931	-	-	-	-	2816618-2817350	2322748-2323027	3556-4402	-	-	1406822-1407482	1405470-1406826	-	-	-	26080-28087	28187-29161	347673-349028	347147-347567	705712-706156	714068-715197	9862-11406	1897847-1899584	119147-120499	-	-	-
La140	15	2805899-2807339	-	-	-	-	2819437-2820169	2319999-2320278	3554-4400	-	-	1406977-1407637	1405625-1406981	-	-	-	26074-28081	28181-29155	347824-349179	347298-347718	705831-706275	714183-715312	9860-11404	1897234-1898971	119131-120483	-	-	-
La141	15	2815852-2817292	-	-	-	-	2813628-2814360	2321397-2321676	3556-4402	-	-	1406411-1407071	1405059-1406415	-	-	-	26080-28087	28187-29161	347605-348960	347079-347499	705612-706056	713968-715097	9862-11406	1897396-1899133	119137-120489	-	-	-
La142	15	2831643-2833083	-	-	-	-	2825836-2826568	2321889-2322168	3554-4400	-	-	1406919-1407579	1405567-1406923	-	-	-	26074-28081	28181-29155	347792-349147	347266-347686	705938-706382	714290-715419	9860-11404	1898089-1899826	119336-120688	-	-	-
La143	15	2810580-2812020	-	-	-	-	2826231-2826963	2217132-2217411	15884-16730	-	-	1302497-1303157	1301145-1302501	-	-	-	2674922-2676929	2677029-2678003	243168-244523	242642-243062	601320-601764	609680-610809	22190-23734	1793959-1795696	2768112-2769464	-	-	-
La144	15	2849504-2850944	-	-	-	-	2812416-2813148	2313164-2313443	3552-4398	-	-	1394736-1395396	1393384-1394740	-	-	-	14261-16268	16368-17342	335898-337253	335372-335792	693869-694313	702217-703346	9858-11402	1885565-1887302	107397-108749	-	-	-
La145	15	2862937-2864377	-	-	-	-	2832917-2833649	2322151-2322430	26851-27697	-	-	1407010-1407670	1405658-1407014	-	-	-	2580-4587	4687-5661	347755-349110	347229-347649	705833-706277	714193-715322	33157-34701	1897958-1899695	119275-120627	-	-	-
La146	15	2834590-2836030	-	-	-	-	2832368-2833100	2344636-2344915	3554-4400	-	-	1406456-1407116	1405105-1406460	-	-	-	26074-28081	28181-29155	347648-349003	347122-347542	705655-706099	714007-715136	9860-11404	1896992-1898729	119131-120483	-	-	-
La147	15	2820538-2821978	-	-	-	-	2814731-2815463	2213787-2214066	3554-4400	-	-	1300694-1301354	1299342-1300698	-	-	-	2671397-2673404	2673504-2674478	241821-243176	241295-241715	599828-600272	608180-609309	9860-11404	1791566-1793303	2764454-2765806	-	-	-
La148	15	2856783-2858223	-	-	-	-	2799069-2799801	2310131-2310410	3554-4400	-	-	1395880-1396540	1394528-1395884	-	-	-	14267-16274	16374-17348	335780-337135	335254-335674	695121-695565	703473-704602	9860-11404	1887068-1888805	107324-108676	-	-	-
La150	15	2835431-2836871	-	-	-	-	2831312-2832044	2320167-2320446	3554-4400	-	-	1406358-1407018	1405006-1406362	-	-	-	26074-28081	28181-29155	347591-348946	347065-347485	705598-706042	713950-715079	9860-11404	1897271-1899008	119135-120487	-	-	-
La151	15	2855852-2857292	-	-	-	-	2814754-2815486	2219422-2219701	3944-4790	-	-	1300894-1301554	1299542-1300898	-	-	-	2677037-2679044	2679144-2680118	241821-243176	241295-241715	599915-600359	608267-609396	10250-11794	1791710-1793447	2770094-2771446	-	-	-
La152	15	2810989-2812429	-	-	-	-	2820468-2821200	2221343-2221622	3552-4398	-	-	1301140-1301800	1299788-1301144	-	-	-	2678727-2680734	2680834-2681808	241538-242893	241012-241432	599773-600217	608121-609250	9858-11402	1791870-1793607	2771784-2773136	-	-	-
La153	15	2835624-2837064	-	-	-	-	2814630-2815362	2326421-2326700	26851-27697	-	-	1406887-1407547	1405535-1406891	-	-	-	2580-4587	4687-5661	347798-349153	347272-347692	705877-706321	714237-715366	33157-34701	1900680-1902417	119275-120627	-	-	-
La154	16	2830243-2831683	-	-	-	-	2829579-2830038	2403802-2404081	108304-109150	-	-	1488690-1489350	1487338-1488694	-	-	-	84093-86100	86200-87174	429825-431180	429299-429719	787643-788087	795995-797124	114610-116154	1979353-1981090	201369-202721	-	-	-
La155	15	2829955-2831395	-	-	-	-	2806683-2807415	2319387-2319666	3552-4398	-	-	1407001-1407661	1405649-1407005	-	-	-	26068-28075	28175-29149	347691-349046	347165-347585	705697-706141	714045-715174	9858-11402	1896989-1898726	119125-120477	-	-	-
La156	15	2904084-2905524	-	-	-	-	2821848-2822580	2321037-2321316	3421-4267	-	-	1405902-1406562	1404550-1405906	-	-	-	25798-27805	27905-28879	347382-348737	346856-347276	705323-705767	713659-714788	9727-11271	1897935-1899672	118975-120327	-	-	-
La157	15	2883696-2885136	-	-	-	-	2822865-2823597	2349562-2349841	3421-4267	-	-	1432820-1433480	1431468-1432824	-	-	-	52702-54709	54809-55783	374204-375559	373678-374098	732153-732597	740489-741618	9727-11271	1924932-1926669	145797-147149	-	-	-
La158	15	2829497-2830937	-	-	-	-	2814242-2814974	2324160-2324439	3552-4398	-	-	1407784-1408444	1406432-1407788	-	-	-	26068-28075	28175-29149	349025-350380	348499-348919	706996-707440	715344-716473	9858-11402	1898728-1900465	119125-120477	-	-	-
La159	16	2858509-2859949	-	-	-	-	2843073-2843805	2321529-2321808	3552-4398	-	-	1404069-1404729	1402717-1404073	-	2862832-2863318	-	26607-28614	28714-29688	345081-346436	344555-344975	703139-703583	711487-712616	9858-11402	1897582-1899319	116534-117886	-	-	-
La160	15	2823879-2825319	-	-	-	-	2815678-2816410	2321909-2322188	3558-4404	-	-	1406702-1407362	1405350-1406706	-	-	-	26086-28093	28193-29167	347789-349144	347263-347683	705895-706339	714255-715384	9864-11408	1897979-1899716	119217-120569	-	-	-
La161	15	2841996-2843436	-	-	-	-	2845247-2845979	2232849-2233128	3944-4790	-	-	1301075-1301735	1299723-1301079	-	-	-	2690412-2692419	2692519-2693493	241822-243177	241296-241716	600136-600580	608488-609617	10250-11794	1792121-1793858	2783417-2784769	-	-	-
La162	15	2816796-2818236	-	-	-	-	2814574-2815306	2319170-2319449	26455-27301	-	-	1406482-1407142	1405130-1406486	-	-	-	2576-4583	4683-5657	347715-349070	347189-347609	705722-706166	714074-715203	32761-34305	1897484-1899221	119259-120611	-	-	-
La163	15	2856006-2857446	-	-	-	-	2809924-2810656	2289852-2290131	15884-16730	-	-	1377503-1378163	1376151-1377507	-	-	-	2747453-2749460	2749560-2750534	317804-319159	317278-317698	676229-676673	684589-685718	22190-23734	1868423-1870160	89324-90676	-	-	-
La164	15	2836776-2838216	-	-	-	-	2814204-2814936	2321187-2321466	3554-4400	-	-	1406093-1406753	1404741-1406097	-	-	-	26074-28081	28181-29155	347184-348539	346658-347078	705155-705599	713507-714636	9860-11404	1897099-1898836	118603-119955	-	-	-
La165	15	2826022-2827462	-	-	-	-	2810380-2811112	2323030-2323309	3558-4404	-	-	1408322-1408982	1406970-1408326	-	-	-	26086-28093	28193-29167	348997-350352	348471-348891	707076-707520	715436-716565	9864-11408	1898934-1900671	119241-120593	-	-	-
La166	15	2824668-2826108	-	-	-	-	2813292-2814024	1131293-1131572	3554-4400	-	-	2200004-2200664	2200660-2202016	-	-	-	26074-28081	28181-29155	347765-349120	347239-347659	705731-706175	714083-715212	9860-11404	1708364-1710101	119210-120562	-	-	-
La167	15	2808151-2809591	-	-	-	-	2813911-2814643	2310234-2310513	3554-4400	-	-	1394931-1395591	1393579-1394935	-	-	-	14267-16274	16374-17348	335780-337135	335254-335674	693782-694226	702134-703263	9860-11404	1886413-1888150	107324-108676	-	-	-
La168	15	2839447-2840887	-	-	-	-	2832799-2833531	1130232-1130511	3552-4398	-	-	2201645-2202305	2202301-2203657	-	-	-	26068-28075	28175-29149	347644-348999	347118-347538	705576-706020	713924-715053	9858-11402	1710361-1712098	119125-120477	-	-	-
La169	15	2855486-2856926	-	-	-	-	2819430-2820162	2323917-2324196	3554-4400	-	-	1406585-1407245	1405233-1406589	-	-	-	26076-28083	28183-29157	347589-348944	347063-347483	705678-706122	714030-715159	9860-11404	1897136-1898873	119133-120485	-	-	-
La170	16	2830152-2831592	-	-	-	-	2853459-2854191	2310534-2310813	9869-10715	-	-	1395889-1396549	1394537-1395893	-	2850511-2850997	-	2582-4589	4689-5663	336748-338103	336222-336642	694863-695307	703227-704356	16175-17719	1886931-1888668	107066-108418	-	-	-
La171	15	2837506-2838946	-	-	-	-	2807902-2808634	1025934-1026213	3558-4404	-	-	2199798-2200458	2200454-2201810	-	-	-	1483640-1485647	1485747-1486721	241869-243224	241343-241763	600102-600546	608462-609591	9864-11408	1707696-1709433	1576784-1578136	-	-	-
La172	15	2820369-2821809	-	-	-	-	2825479-2826211	1025184-1025463	3554-4400	-	-	2197509-2198169	2198165-2199521	-	-	-	1482749-1484756	1484856-1485830	241863-243218	241337-241757	599927-600371	608279-609408	9860-11404	1706138-1707875	1575668-1577020	-	-	-
La173	15	2818957-2820397	-	-	-	-	2813459-2814191	2302481-2302760	15878-16724	-	-	1386684-1387344	1385332-1386688	-	-	-	2760074-2762081	2762181-2763155	327846-329201	327320-327740	685810-686254	694158-695287	22184-23728	1877869-1879606	99402-100754	-	-	-
La174	15	2858414-2859854	-	-	-	-	2853632-2854364	2268768-2269047	3560-4406	-	-	1302832-1303492	1301480-1302836	-	-	-	2726480-2728487	2728587-2729561	241857-243212	241331-241751	601548-601992	609912-611041	9866-11410	1793695-1795432	2819414-2820766	-	-	-
La175	15	2861916-2863356	-	-	-	-	2808685-2809417	2296546-2296825	3423-4269	-	-	1383386-1384046	1382034-1383390	-	-	-	2753862-2755869	2755969-2756943	324975-326330	324449-324869	682872-683316	691212-692341	9729-11273	1874410-1876147	96455-97807	-	-	-
La176	15	2841999-2843439	-	-	-	-	2813385-2814117	2298636-2298915	3920-4766	-	-	1404889-1405549	1403537-1404893	-	-	-	2756367-2758374	2758474-2759448	325345-326700	324819-325239	703704-704148	712056-713185	10226-11770	1895478-1897215	96802-98154	-	-	-
La177	15	2841302-2842742	-	-	-	-	2829694-2830426	2215484-2215763	3556-4402	-	-	1301428-1302088	1300076-1301432	-	-	-	2672708-2674715	2674815-2675789	241972-243327	241446-241866	600015-600459	608512-609641	9862-11406	1792163-1793900	2765765-2767117	-	-	-
La178	15	2815555-2816995	-	-	-	-	2843199-2843931	2326631-2326910	3554-4400	-	-	1406031-1406691	1404679-1406035	-	-	-	25949-27956	28056-29030	347013-348368	346487-346907	705103-705547	713455-714584	9860-11404	1900126-1901863	118558-119910	-	-	-
La179	15	2849377-2850817	-	-	-	-	2812234-2812966	2319131-2319410	23782-24628	-	-	1403706-1404366	1402354-1403710	-	-	-	2576-4583	4683-5657	344744-346099	344218-344638	702750-703194	711102-712231	30088-31632	1894229-1895966	116202-117554	-	-	-
La180	16	2855267-2856707	-	-	-	-	2810918-2811650	2281216-2281495	2739463-2740309	-	-	1382829-1383489	1381477-1382833	-	2818231-2818717	-	2576-4583	4683-5657	323850-325205	323324-323744	681857-682301	690209-691338	2745769-2747313	1858538-1860275	95394-96746	-	-	-
La181	15	2839501-2840941	-	-	-	-	2816937-2817669	2319447-2319726	26072-26918	-	-	1406191-1406851	1404839-1406195	-	-	-	2578-4585	4685-5659	346907-348262	346381-346801	705371-705815	713727-714856	32378-33922	1897224-1898961	118439-119791	-	-	-
La182	15	2779074-2780514	-	-	-	-	2814033-2814765	1130152-1130431	3546-4392	-	-	2198988-2199648	2199644-2201000	-	-	-	25796-27803	27903-28877	347157-348512	346631-347051	705017-705461	713353-714482	9852-11396	1707058-1708795	118510-119862	-	-	-
La183	15	2809201-2810641	-	-	-	-	2817196-2817928	2321102-2321381	3528-4374	-	-	1406578-1407238	1405226-1406582	-	-	-	26044-28051	28151-29125	347545-348900	347019-347439	705516-705960	713864-714993	9834-11378	1897242-1898979	119101-120453	-	-	-
La184	15	2825928-2827368	-	-	-	-	2817394-2818126	2321421-2321700	18970-19816	-	-	1383750-1384410	1382398-1383754	-	-	-	2784958-2786965	2787065-2788039	325188-326543	324662-325082	683159-683603	691507-692636	11966-13510	1874840-1876577	96746-98098	-	-	-
La185	16	2879195-2880635	-	-	-	-	2841289-2842021	2303090-2303369	2761397-2762243	-	-	1383892-1384552	1382540-1383896	-	2830041-2830527	-	2582-4589	4689-5663	324054-325409	323528-323948	682864-683308	691228-692357	2767703-2769247	1877899-1879636	95562-96914	-	-	-
La186	15	2843752-2845192	-	-	-	-	2817899-2818631	2321006-2321285	26197-27043	-	-	1406098-1406758	1404746-1406102	-	-	-	2576-4583	4683-5657	347016-348371	346490-346910	705045-705489	713397-714526	32503-34047	1897245-1898982	118560-119912	-	-	-
La187	15	2873559-2874999	-	-	-	-	2805943-2806675	2316622-2316901	3552-4398	-	-	1399516-1400176	1398164-1399520	-	-	-	19041-21048	21148-22122	340580-341935	340054-340474	698655-699099	707003-708132	9858-11402	1890069-1891806	112137-113489	-	-	-
La188	16	2882839-2884279	-	-	-	-	2842242-2842974	2335274-2335553	19559-20405	-	-	1415626-1416286	1414274-1415630	-	2874568-2875054	-	2792683-2794690	2794790-2795764	356618-357973	356092-356512	714505-714949	722845-723974	25865-27409	1906412-1908149	128199-129551	-	-	-
La189	15	2857037-2858477	-	-	-	-	2809591-2810323	2320741-2321020	26833-27679	-	-	1406937-1407597	1405585-1406941	-	-	-	2574-4581	4681-5655	347786-349141	347260-347680	705822-706266	714170-715299	33139-34683	1898341-1900078	119251-120603	-	-	-
La190	15	2794534-2795974	-	-	-	-	2735353-2736085	2225812-2226091	2683990-2684836	-	-	1311213-1311873	1309861-1311217	-	-	-	2572-4579	4679-5653	252483-253838	251957-252377	610418-610862	618762-619891	2690296-2691840	1802120-1803857	95348-96700	-	-	-
La191	15	2821032-2822472	-	-	-	-	2814625-2815357	2327333-2327612	3944-4790	-	-	1384840-1385500	1383488-1384844	-	-	-	2784898-2786905	2787005-2787979	325385-326740	324859-325279	683392-683836	691744-692873	10250-11794	1876102-1877839	96822-98174	-	-	-
La192	16	2881726-2883166	-	-	-	-	1677107-1677839	2347050-2347329	2773842-2774688	-	-	1414594-1415254	1413242-1414598	-	2828623-2829109	-	45601-47608	47708-48682	364289-365644	363763-364183	721077-721521	729333-730462	2780148-2781692	1912828-1914565	134884-136236	-	-	-
La193	16	2865095-2866535	-	-	-	-	2855225-2855957	2324577-2324856	3558-4404	-	-	1408263-1408923	1406911-1408267	-	2859445-2859931	-	25959-27966	28066-29040	346947-348302	346421-346841	705294-705738	713654-714783	9864-11408	1899510-1901247	118416-119768	-	-	-
La194	15	2833262-2834702	-	-	-	-	2821022-2821754	1024432-1024711	3413-4259	-	-	2198332-2198992	2198988-2200344	-	-	-	1481837-1483844	1483944-1484918	241727-243082	241201-241621	599425-599869	607745-608874	9719-11263	1705239-1706976	1574773-1576125	-	-	-
La195	15	2805857-2807297	-	-	-	-	2815867-2816599	2243258-2243537	3944-4790	-	-	1301510-1302170	1300158-1301514	-	-	-	2700973-2702980	2703080-2704054	241847-243202	241321-241741	600029-600473	608389-609518	10250-11794	1792561-1794298	2794030-2795382	-	-	-
La196	15	2837434-2838874	-	-	-	-	2817529-2818261	2349091-2349370	3552-4398	-	-	1406610-1407270	1405258-1406614	-	-	-	26070-28077	28177-29151	347683-349038	347157-347577	705654-706098	714002-715131	9858-11402	1898026-1899763	119239-120591	-	-	-
La197	14	2857305-2858745	-	-	-	-	2843312-2844044	1107545-1107824	-	-	-	2179041-2179701	2179697-2181053	-	2849378-2849864	-	2675-4682	4782-5756	324055-325410	323529-323949	682282-682726	690630-691759	-	1686698-1688435	95611-96963	-	-	-
La198	15	2867975-2869415	-	-	-	-	2817321-2818053	1108965-1109244	3944-4790	-	-	2203029-2203689	2203685-2205041	-	-	-	1566575-1568582	1568682-1569656	325561-326916	325035-325455	683639-684083	691999-693128	10250-11794	1707910-1709647	96909-98261	-	-	-
La199	16	2871348-2872788	-	-	-	-	2833762-2834494	2302057-2302336	2760052-2760898	-	-	1383061-1383721	1381709-1383065	-	2854490-2854976	-	2564-4571	4671-5645	324057-325412	323531-323951	682210-682654	690538-691667	2766358-2767902	1875959-1877696	95422-96774	-	-	-
La200	15	2819260-2820700	-	-	-	-	2806592-2807324	2200107-2200386	3383-4229	-	-	1397821-1398481	1396469-1397825	-	-	-	25559-27566	27666-28640	347321-348676	346795-347215	703915-704359	712175-713304	9689-11233	2659730-2661467	117793-119145	-	-	-
La201	15	2822745-2824185	-	-	-	-	2814884-2815616	2301520-2301799	4071-4917	-	-	1384451-1385111	1383099-1384455	-	-	-	2759098-2761105	2761205-2762179	325635-326990	325109-325529	683742-684186	692078-693207	10377-11921	1876723-1878460	96794-98146	-	-	-
La203	15	2822096-2823536	-	-	-	-	2817936-2818668	2506551-2506830	4071-4917	-	-	1625444-1626104	1626100-1627456	-	-	-	209420-211427	211527-212501	530861-532216	530335-530755	888667-889111	896995-898124	10377-11921	1133720-1135457	302477-303829	-	-	-
La204	15	2842619-2844059	-	-	-	-	2807341-2808073	1131030-1131309	26455-27301	-	-	2198093-2198753	2198749-2200105	-	-	-	2576-4583	4683-5657	347717-349072	347191-347611	705767-706211	714119-715248	32761-34305	1706014-1707751	119261-120613	-	-	-
La205	16	2901876-2903316	-	-	-	-	2853271-2854003	2300018-2300297	2758258-2759104	-	-	1383263-1383923	1381911-1383267	-	2844086-2844572	-	2576-4583	4683-5657	323942-325297	323416-323836	682209-682653	690561-691690	2764564-2766108	1874902-1876639	95429-96781	-	-	-
La206	16	2826198-2827638	-	-	-	-	2852229-2852961	2339674-2339953	2767187-2768033	-	-	1426147-1426807	1424795-1426151	-	2858351-2858837	-	45470-47477	47577-48551	367050-368405	366524-366944	725270-725714	733622-734751	2773493-2775037	1917475-1919212	138594-139946	-	-	-
La207	15	2838793-2840233	-	-	-	-	2829415-2830147	2300935-2301214	3944-4790	-	-	1386600-1387260	1385248-1386604	-	-	-	2758489-2760496	2760596-2761570	327818-329173	327292-327712	685579-686023	693897-695026	10250-11794	1877788-1879525	99384-100736	-	-	-
La208	14	2829443-2830883	-	-	-	-	1653421-1654153	2324890-2325169	2591021-2591867	-	-	1390652-1391312	1389300-1390656	-	-	-	2694-4701	4801-5775	324421-325776	323895-324315	682743-683187	691091-692220	-	1895440-1897177	95979-97331	-	-	-
La209	15	2840588-2842028	-	-	-	-	2833972-2834704	2317833-2318112	3552-4398	-	-	1404799-1405459	1403447-1404803	-	-	-	24379-26386	26486-27460	345943-347298	345417-345837	703907-704351	712255-713384	9858-11402	1895765-1897502	117499-118851	-	-	-
La210	13	2793407-2794847	-	-	-	-	2780088-2780820	2272502-2272781	-	-	-	1360275-1360935	1358923-1360279	-	-	-	2731726-2733733	2733833-2734807	300850-302205	300324-300744	659207-659651	667546-668675	-	1849161-1850898	72208-73560	-	-	-
La211	15	2880680-2882120	-	-	-	-	2818776-2819508	2301836-2302115	3429-4275	-	-	1383715-1384375	1382363-1383719	-	-	-	2759288-2761295	2761395-2762369	324541-325896	324015-324435	683109-683553	691460-692589	9653-11197	1874291-1876028	95416-96768	-	-	-
La212	15	2831099-2832539	-	-	-	-	2806257-2806989	2323316-2323595	3421-4267	-	-	1406742-1407402	1405390-1406746	-	-	-	25964-27971	28071-29045	347976-349331	347450-347870	706302-706746	714638-715767	9727-11271	1897316-1899053	118363-119715	-	-	-
La213	16	2843841-2845281	-	-	-	-	2811865-2812597	2349048-2349327	3548-4394	-	-	1406900-1407560	1405548-1406904	-	-	-	26176-28183	28283-29257	347858-349213	347332-347752	706161-706605	714501-715630	9854-11398	1897419-1899156	119438-120790	-	-	-
La214	15	2876638-2878078	-	-	-	-	2835355-2836087	2348614-2348893	23771-24617	-	-	1404250-1404910	1402898-1404254	-	-	-	2694-4701	4801-5775	345946-347301	345420-345840	704027-704471	712375-713504	30077-31621	1894652-1896389	116303-117655	-	-	-
La215	15	2812820-2814260	-	-	-	-	1669867-1670599	2327577-2327856	3431-4277	-	-	1407175-1407835	1405823-1407179	-	-	-	25988-27995	28095-29069	347514-348869	346988-347408	705885-706329	714241-715370	9737-11281	1904883-1906620	119023-120375	-	-	-
La216	13	2799215-2800655	-	-	-	-	2788043-2788775	2405574-2405853	-	-	-	1464397-1465057	1463045-1464401	-	-	-	87868-89875	89975-90949	408619-409974	408093-408513	767345-767789	775685-776814	-	1955538-1957275	179876-181228	-	-	-
La217	15	2818493-2819933	-	-	-	-	2825686-2826418	2327915-2328194	3554-4400	-	-	1406866-1407526	1405514-1406870	-	-	-	26194-28201	28301-29275	347945-349300	347419-347839	706060-706504	714412-715541	9860-11404	1898030-1899767	119363-120715	-	-	-
La218	15	2842573-2844013	-	-	-	-	2807378-2808110	2319977-2320256	3558-4404	-	-	1405537-1406197	1404185-1405541	-	-	-	24397-26404	26504-27478	346014-347369	345488-345908	704172-704616	712532-713661	9864-11408	1896326-1898063	117534-118886	-	-	-
La219	15	2885691-2887131	-	-	-	-	2801034-2801766	2201778-2202057	3427-4273	-	-	1288124-1288784	1286772-1288128	-	-	-	2660983-2662990	2663090-2664064	229623-230978	229097-229517	587699-588143	596047-597176	9733-11277	1778344-1780081	2753992-2755344	-	-	-
La220	15	2860447-2861887	-	-	-	-	2815517-2816249	2329497-2329776	3431-4277	-	-	1409750-1410410	1408398-1409754	-	-	-	9386-11393	11493-12467	329001-330356	328475-328895	708015-708459	716624-717756	2796026-2797570	1901436-1903173	100214-101566	-	-	-
La221	15	2826529-2827969	-	-	-	-	2806876-2807608	2307871-2308150	3421-4267	-	-	1389662-1390322	1388310-1389666	-	-	-	14296-16303	16403-17377	335233-336588	334707-335127	693250-693694	701586-702715	9727-11271	1885219-1886956	106766-108118	-	-	-
La222	15	2863574-2865014	-	-	-	-	2841804-2842536	2329214-2329493	3425-4271	-	-	1409412-1410072	1408060-1409416	-	-	-	25976-27983	28083-29057	348505-349860	347979-348399	708459-708903	716803-717932	9731-11275	1900064-1901801	118872-120224	-	-	-
La223	15	2818095-2819535	-	-	-	-	2808746-2809478	2318378-2318657	3546-4392	-	-	1403233-1403893	1401881-1403237	-	-	-	24358-26365	26465-27439	344062-345417	343536-343956	702181-702625	710517-711646	9852-11396	1894708-1896445	117454-118806	-	-	-
La225	15	2843562-2845002	-	-	-	-	2836175-2836907	2324923-2325202	26179-27025	-	-	1402215-1402875	1400863-1402219	-	-	-	2570-4577	4677-5651	347149-348504	346623-347043	705180-705624	713520-714649	32485-34029	1896833-1898570	118625-119977	-	-	-
La227	15	2822600-2824040	-	-	-	-	2810130-2810862	2321143-2321422	3554-4400	-	-	1407764-1408424	1406412-1407768	-	-	-	26074-28081	28181-29155	348788-350143	348262-348682	706795-707239	715147-716276	9860-11404	1898214-1899951	119135-120487	-	-	-
La228	15	2828452-2829892	-	-	-	-	2812483-2813215	2216724-2217003	4071-4917	-	-	1301767-1302427	1300415-1301771	-	-	-	2674135-2676142	2676242-2677216	242988-244343	242462-242882	602565-603009	610905-612034	10377-11921	1792878-1794615	2767344-2768696	-	-	-
La229	15	2875170-2876610	-	-	-	-	2823028-2823760	2321532-2321811	3548-4394	-	-	1406480-1407140	1405128-1406484	-	-	-	26056-28063	28163-29137	347617-348972	347091-347511	705503-705947	713843-714972	9854-11398	1897562-1899299	119113-120465	-	-	-
La231	16	2863674-2865114	-	-	-	-	2832981-2833713	2330363-2330642	3423-4269	-	-	1406928-1407588	1405576-1406932	-	-	-	25970-27977	28077-29051	347668-349023	347142-347562	706182-706626	714522-715651	9729-11273	1883180-1884917	119249-120601	-	-	-
La232	15	2865662-2867102	-	-	-	-	1667819-1668551	2326590-2326869	26168-27014	-	-	1404908-1405568	1403556-1404912	-	-	-	2688-4695	4795-5769	347032-348387	346506-346926	705004-705448	713340-714469	32474-34018	1903587-1905324	118540-119892	-	-	-
La233	18	2842818-2844258	-	-	2832227-2833022	-	1651721-1652453	2322195-2322474	26219-27065	2833114-2833657	2833653-2834484	1388651-1389311	1387299-1388655	-	-	-	2732-4739	4839-5813	338942-340297	338416-338836	692860-693304	701623-702752	32525-34069	1886399-1888136	110437-111789	-	-	-
La234	15	2846477-2847917	-	-	-	-	2795982-2796714	2320705-2320984	3546-4392	-	-	1405199-1405859	1403847-1405203	-	-	-	25796-27803	27903-28877	346674-348029	346148-346568	704537-704981	712873-714002	9852-11396	1898870-1900607	118266-119618	-	-	-
La235	15	2843078-2844518	-	-	-	-	2832183-2832915	2326073-2326352	3558-4404	-	-	1406628-1407288	1405276-1406632	-	-	-	26086-28093	28193-29167	347623-348978	347097-347517	705766-706210	714126-715255	9864-11408	1897660-1899397	119143-120495	-	-	-
La236	15	2814701-2816141	-	-	-	-	2828009-2828741	2324032-2324311	3554-4400	-	-	1407879-1408539	1406527-1407883	-	-	-	26074-28081	28181-29155	347789-349144	347263-347683	706403-706847	714755-715884	9860-11404	1901994-1903731	119212-120564	-	-	-
La237	15	2809235-2810675	-	-	-	-	2817141-2817873	2216373-2216652	3944-4790	-	-	1302405-1303065	1301053-1302409	-	-	-	2674074-2676081	2676181-2677155	243128-244483	242602-243022	601278-601722	609638-610767	10250-11794	1793490-1795227	2767224-2768576	-	-	-
La238	15	2832310-2833750	-	-	-	-	2815815-2816547	2316867-2317146	3439-4285	-	-	1404284-1404944	1402932-1404288	-	-	-	25994-28001	28101-29075	344552-345907	344026-344446	702944-703388	711291-712420	9745-11289	1894915-1896652	116110-117462	-	-	-
La239	15	2825994-2827434	-	-	-	-	2810518-2811250	2323058-2323337	26076-26922	-	-	1407539-1408199	1406187-1407543	-	-	-	2580-4587	4687-5661	348296-349651	347770-348190	706502-706946	714947-716076	32382-33926	1898566-1900303	118447-119799	-	-	-
La240	15	2846373-2847813	-	-	-	-	2820219-2820951	2319604-2319883	3554-4400	-	-	1406583-1407243	1405231-1406587	-	-	-	26074-28081	28181-29155	347587-348942	347061-347481	705594-706038	713946-715075	9860-11404	1897368-1899105	119131-120483	-	-	-
La241	15	2832731-2834171	-	-	-	-	2807981-2808713	2320941-2321220	3554-4400	-	-	1407385-1408045	1406033-1407389	-	-	-	26074-28081	28181-29155	347198-348553	346672-347092	705205-705649	713557-714686	9860-11404	1898083-1899820	118617-119969	-	-	-
La242	15	2836176-2837616	-	-	-	-	2819828-2820560	2320110-2320389	3554-4400	-	-	1406853-1407513	1405501-1406857	-	-	-	26074-28081	28181-29155	347694-349049	347168-347588	705701-706145	714053-715182	9860-11404	1898089-1899826	119131-120483	-	-	-
La243	15	2857625-2859065	-	-	-	-	2814873-2815605	2322572-2322851	3554-4400	-	-	1407490-1408150	1406138-1407494	-	-	-	26074-28081	28181-29155	347896-349251	347370-347790	706434-706878	714786-715915	9860-11404	1898529-1900266	119222-120574	-	-	-
La244	15	2863323-2864763	-	-	-	-	2811881-2812613	2321901-2322180	3546-4392	-	-	1405982-1406642	1404630-1405986	-	-	-	26050-28057	28157-29131	347515-348870	346989-347409	705378-705822	713714-714843	9852-11396	1898914-1900651	119107-120459	-	-	-
La246	15	2843180-2844620	-	-	-	-	2810428-2811160	2319754-2320033	3548-4394	-	-	1402819-1403479	1401467-1402823	-	-	-	26056-28063	28163-29137	347270-348625	346744-347164	705870-706314	714210-715339	9854-11398	1897562-1899299	118579-119931	-	-	-
La248	15	2814122-2815562	-	-	-	-	2808315-2809047	2318996-2319275	3554-4400	-	-	1377548-1378208	1376196-1377552	-	-	-	26074-28081	28181-29155	347587-348942	347061-347481	676767-677211	685119-686248	9860-11404	1896548-1898285	119131-120483	-	-	-
La249	15	2865645-2867085	-	-	-	-	2827301-2828033	2329975-2330254	3558-4404	-	-	1393337-1393997	1391985-1393341	-	-	-	26086-28093	28193-29167	348013-349368	347487-347907	692158-692602	700518-701647	9864-11408	1884279-1886016	119256-120608	-	-	-
La250	15	2869662-2871102	-	-	-	-	2808108-2808840	2297347-2297626	4071-4917	-	-	1379738-1380398	1378386-1379742	-	-	-	2754762-2756769	2756869-2757843	324699-326054	324173-324593	682562-683006	690898-692027	10377-11921	1875478-1877215	96291-97643	-	-	-
La251	15	2863420-2864860	-	-	-	-	2851518-2852250	2316678-2316957	3399-4245	-	-	1396188-1396848	1394836-1396192	-	-	-	25605-27612	27712-28686	346270-347625	345744-346164	701858-702302	710150-711279	9705-11249	1885159-1886896	117994-119346	-	-	-
La252	15	2819643-2821083	-	-	-	-	2812757-2813489	2322291-2322570	26191-27037	-	-	1406704-1407364	1405352-1406708	-	-	-	2574-4581	4681-5655	347292-348647	346766-347186	705532-705976	713880-715009	32497-34041	1900070-1901807	118735-120087	-	-	-
La253	15	2859979-2861419	-	-	-	-	2792619-2793351	2265508-2265787	3421-4267	-	-	1338659-1339319	1337307-1338663	-	-	-	2723142-2725149	2725249-2726223	283747-285102	283221-283641	641610-642054	649946-651075	9727-11271	1834603-1836340	55171-56523	-	-	-
La254	15	2827997-2829437	-	-	-	-	2810476-2811208	2325054-2325333	3540-4386	-	-	1406025-1406685	1404673-1406029	-	-	-	26032-28039	28139-29113	347601-348956	347075-347495	705443-705887	713767-714896	9846-11390	1896322-1898059	119089-120441	-	-	-
La255	15	2820218-2821658	-	-	-	-	2827739-2828471	2319115-2319394	3552-4398	-	-	1406365-1407025	1405013-1406369	-	-	-	26068-28075	28175-29149	347625-348980	347099-347519	705589-706033	713937-715066	9858-11402	1897175-1898912	119125-120477	-	-	-
La256	15	2836427-2837867	-	-	-	-	2791842-2792574	1130800-1131079	3554-4400	-	-	2198647-2199307	2199303-2200659	-	-	-	26074-28081	28181-29155	347660-349015	347134-347554	705377-705821	713729-714858	9860-11404	1706581-1708318	119131-120483	-	-	-
La257	15	2853133-2854573	-	-	-	-	2817071-2817803	1130889-1131168	3552-4398	-	-	2200716-2201376	2201372-2202728	-	-	-	26068-28075	28175-29149	347695-349050	347169-347589	705666-706110	714014-715143	9858-11402	1708728-1710465	119251-120603	-	-	-
La258	15	2819725-2821165	-	-	-	-	2807675-2808407	2319145-2319424	3542-4388	-	-	1402305-1402965	1400953-1402309	-	-	-	26038-28045	28145-29119	347551-348906	347025-347445	705350-705794	713678-714807	9848-11392	1896524-1898261	119124-120476	-	-	-
La259	15	2838858-2840298	-	-	-	-	2810019-2810751	1066463-1066742	3419-4265	-	-	2203688-2204348	2204344-2205700	-	-	-	1523791-1525798	1525898-1526872	283534-284889	283008-283428	641361-641805	649693-650822	9725-11269	1710088-1711825	55138-56490	-	-	-
La260	15	2840229-2841669	-	-	-	-	2809918-2810650	1130025-1130304	3413-4259	-	-	2198296-2198956	2198952-2200308	-	-	-	25901-27908	28008-28982	347297-348652	346771-347191	705015-705459	713335-714464	9719-11263	1706761-1708498	118893-120245	-	-	-
La261	15	2845837-2847277	-	-	-	-	2818555-2819287	2320422-2320701	3554-4400	-	-	1407311-1407971	1405959-1407315	-	-	-	26074-28081	28181-29155	347972-349327	347446-347866	706058-706502	714410-715539	9860-11404	1897505-1899242	119224-120576	-	-	-
La262	15	2842556-2843996	-	-	-	-	2819989-2820721	2321374-2321653	26833-27679	-	-	1407434-1408094	1406082-1407438	-	-	-	2574-4581	4681-5655	347780-349135	347254-347674	706427-706871	714775-715904	33139-34683	1898349-1900086	119336-120688	-	-	-
La264	15	2823721-2825161	-	-	-	-	2816706-2817438	2318690-2318969	3554-4400	-	-	1406795-1407455	1405443-1406799	-	-	-	26074-28081	28181-29155	347844-349199	347318-347738	705851-706295	714203-715332	9860-11404	1897333-1899070	119388-120740	-	-	-
La265	15	2815642-2817082	-	-	-	-	2826492-2827224	2320303-2320582	3552-4398	-	-	1406847-1407507	1405495-1406851	-	-	-	26068-28075	28175-29149	347759-349114	347233-347653	705788-706232	714136-715265	9858-11402	1897535-1899272	119127-120479	-	-	-
La266	15	2846009-2847449	-	-	-	-	2813692-2814424	2320752-2321031	26815-27661	-	-	1405835-1406495	1404483-1405839	-	-	-	2568-4575	4675-5649	347712-349067	347186-347606	705316-705760	713652-714781	33121-34665	1898082-1899819	119227-120579	-	-	-
La267	15	2857202-2858642	-	-	-	-	2828701-2829433	1130809-1131088	3552-4398	-	-	2199910-2200570	2200566-2201922	-	-	-	26068-28075	28175-29149	347568-348923	347042-347462	705586-706030	713934-715063	9858-11402	1707941-1709678	119125-120477	-	-	-
La268	15	2844820-2846260	-	-	-	-	2825240-2825972	2319648-2319927	26179-27025	-	-	1405804-1406464	1404452-1405808	-	-	-	2570-4577	4677-5651	347266-348621	346740-347160	704777-705221	713117-714246	32485-34029	1896345-1898082	118614-119966	-	-	-
La269	15	2851698-2853138	-	-	-	-	2787180-2787912	2323178-2323457	3399-4245	-	-	1402293-1402953	1400941-1402297	-	-	-	25605-27612	27712-28686	346383-347738	345857-346277	702144-702588	710436-711565	9705-11249	1891089-1892826	118031-119383	-	-	-
La270	15	2817260-2818700	-	-	-	-	2791442-2792174	2329288-2329567	26035-26881	-	-	1406360-1407020	1405008-1406364	-	-	-	2564-4571	4671-5645	348052-349407	347526-347946	705826-706270	714154-715283	32341-33885	1896695-1898432	118374-119726	-	-	-
La271	15	2818295-2819735	-	-	-	-	2779184-2779916	2319874-2320153	3554-4400	-	-	1406526-1407186	1405174-1406530	-	-	-	26074-28081	28181-29155	347587-348942	347061-347481	705594-706038	713946-715075	9860-11404	1897604-1899341	119131-120483	-	-	-
La272	15	2814656-2816096	-	-	-	-	2807593-2808325	2324373-2324652	3550-4396	-	-	1406237-1406897	1404885-1406241	-	-	-	26062-28069	28169-29143	347105-348460	346579-346999	705040-705484	713384-714513	9856-11400	1896908-1898645	118601-119953	-	-	-
La273	15	2844372-2845812	-	-	-	-	2814922-2815654	2319327-2319606	3548-4394	-	-	1406220-1406880	1404868-1406224	-	-	-	26056-28063	28163-29137	347533-348888	347007-347427	705421-705865	713761-714890	9854-11398	1917252-1918989	119113-120465	-	-	-
La274	15	2841200-2842640	-	-	-	-	2810992-2811724	2318736-2319015	3554-4400	-	-	1406525-1407185	1405173-1406529	-	-	-	26074-28081	28181-29155	347660-349015	347134-347554	705662-706106	714014-715143	9860-11404	1896848-1898585	119204-120556	-	-	-
La275	15	2869418-2870858	-	-	-	-	2817682-2818414	2321032-2321311	26197-27043	-	-	1407078-1407738	1405726-1407082	-	-	-	2576-4583	4683-5657	348127-349482	347601-348021	706134-706578	714486-715615	32503-34047	1897908-1899645	118699-120051	-	-	-
La276	15	2865230-2866670	-	-	-	-	2850463-2851195	2317849-2318128	3546-4392	-	-	1426109-1426769	1424757-1426113	-	-	-	25796-27803	27903-28877	347261-348616	346735-347155	725431-725875	733767-734896	9852-11396	1916672-1918409	118853-120205	-	-	-
La277	15	2824625-2826065	-	-	-	-	2813355-2814087	2290499-2290778	19489-20335	-	-	1383004-1383664	1381652-1383008	-	-	-	2753748-2755755	2755855-2756829	326112-327467	325586-326006	684575-685019	692923-694052	12485-14029	1873871-1875608	96479-97831	-	-	-
La278	15	2807154-2808594	-	-	-	-	2810637-2811369	1131341-1131620	3552-4398	-	-	2199794-2200454	2200450-2201806	-	-	-	26068-28075	28175-29149	347764-349119	347238-347658	705793-706237	714141-715270	9858-11402	1707667-1709404	119200-120552	-	-	-
La279	15	2834040-2835480	-	-	-	-	2812259-2812991	2319013-2319292	3552-4398	-	-	1406481-1407141	1405129-1406485	-	-	-	26068-28075	28175-29149	347569-348924	347043-347463	705540-705984	713888-715017	9858-11402	1897175-1898912	119125-120477	-	-	-
La280	15	2854963-2856403	-	-	-	-	2820522-2821254	1130790-1131069	3556-4402	-	-	2198898-2199558	2199554-2200910	-	-	-	26080-28087	28187-29161	347786-349141	347260-347680	705452-705896	713808-714937	9862-11406	1707339-1709076	119319-120671	-	-	-
PL510	18	2827008-2828448	-	-	2821416-2822211	-	1675451-1676183	2318741-2319020	11668-12514	2820781-2821324	2819954-2820785	1412639-1413299	1411287-1412643	-	-	-	24865-26872	26972-27946	352804-354159	352278-352698	710807-711251	719410-720539	17974-19518	1895290-1897027	117902-119254	-	-	-
PL511	18	2837550-2838990	-	-	2824899-2825694	-	1692951-1693683	2345948-2346227	3433-4279	2824264-2824807	2823437-2824268	1430144-1430804	1428792-1430148	-	-	-	16642-18649	18749-19723	338708-340063	338182-338602	696992-697436	705619-706748	9739-11283	1914824-1916561	109821-111173	-	-	-
PL512	18	2826179-2827619	-	-	2832512-2833307	-	1672309-1673041	2331363-2331642	3944-4790	2833399-2833942	2833938-2834769	1409336-1409996	1408403-1409095	-	-	-	2789655-2791662	2791762-2792736	325119-326474	324593-325013	682978-683422	691587-692716	10250-11794	1909831-1911568	96270-97622	-	-	-
PL562	16	2801826-2803266	-	-	2808406-2809201	-	1733555-1734287	2395302-2395581	-	2809293-2809836	2809832-2810663	1470265-1470925	1469332-1470024	-	-	-	87801-89808	89908-90882	409722-411077	409196-409616	769154-769598	777514-778643	-	1967169-1968906	180858-182210	-	-	-
SE501	18	2847700-2849140	-	-	2839043-2839838	-	1755922-1756654	2418756-2419035	15417-16263	2839930-2840473	2840469-2841300	1493036-1493696	1491684-1493040	-	-	-	111231-113238	113338-114312	432757-433253	432231-432651	791071-791515	799407-800536	21723-23267	1990513-1992250	204264-205616	-	-	-
SE502	18	2851267-2852707	-	-	2834552-2835347	-	1645970-1646702	2308629-2308908	3425-4271	2835439-2835982	2835978-2836809	1383055-1383715	1381703-1383059	-	-	-	2766710-2768717	2768817-2769791	324168-325523	323642-324062	682207-682651	690551-691680	9731-11275	1880409-1882146	95736-97088	-	-	-
SE503	18	2825002-2826442	-	-	2843422-2844217	-	1654430-1655162	2319341-2319620	15787-16633	2842787-2843330	2841960-2842791	1391719-1392379	1390367-1391723	-	-	-	2776463-2778470	2778570-2779544	317849-319204	317323-317743	675958-676402	684310-685439	22093-23637	1891285-1893022	89166-90518	-	-	-
SE504	18	2836621-2838061	-	-	2811579-2812374	-	1655246-1655978	2317523-2317802	3554-4400	2810944-2811487	2810117-2810948	1392504-1393164	1391152-1392508	-	-	-	2774712-2776719	2776819-2777793	317948-319303	317422-317842	676738-677182	685090-686219	9860-11404	1889467-1891204	89185-90537	-	-	-
SE505	18	2839498-2840938	-	-	2823006-2823801	-	1754609-1755341	2417985-2418264	3433-4279	2822371-2822914	2821544-2822375	1491571-1492231	1490219-1491575	-	-	-	111192-113199	113299-114273	432511-433866	431985-432405	790939-791383	799299-800428	9739-11283	1989168-1990905	204031-205383	-	-	-
SE506	18	2821551-2822991	-	-	2840941-2841736	-	1755541-1756273	2418526-2418805	3433-4279	2840306-2840849	2839479-2840310	1492528-1493188	1491176-1492532	-	-	-	111116-113123	113223-114197	432450-433805	431924-432344	790841-791285	799201-800330	9739-11283	1990060-1991797	203834-205186	-	-	-
SE507	18	2840872-2842312	-	-	2836276-2837071	-	1750000-1750732	2417990-2418269	3429-4275	2835641-2836184	2834814-2835645	1487061-1487721	1485709-1487065	-	-	-	110170-112177	112277-113251	431501-432856	430975-431395	785405-785849	793761-794890	9735-11279	1985130-1986867	203057-204409	-	-	-
SE508	18	2848988-2850428	-	-	2831914-2832709	-	1636192-1636924	2299601-2299880	3433-4279	2831279-2831822	2830452-2831283	1372550-1373210	1371198-1372554	-	-	-	2757757-2759764	2759864-2760838	312413-313768	311887-312307	671067-671511	679427-680556	9739-11283	1871095-1872832	83939-85291	-	-	-
SE561	18	2847626-2849066	-	-	2831079-2831874	-	1754291-1755023	2415606-2415885	3415-4261	2830444-2830987	2829617-2830448	1491318-1491978	1489966-1491322	-	-	-	110928-112935	113035-114009	432289-433644	431763-432183	790155-790599	798479-799608	9721-11265	1987608-1989345	203874-205226	-	-	-
SI576	18	2831005-2832445	-	-	2840888-2841683	-	1754395-1755127	2419061-2419340	3425-4271	2841775-2842318	2842314-2843145	1491502-1492162	1490150-1491506	-	-	-	110934-112941	113041-114015	432514-433869	431988-432408	790235-790679	798577-799706	9731-11275	1990682-1992419	203916-205268	-	-	-
SI577	18	1773509-1774949	-	-	1259837-1260632	-	183856-184588	2808826-2809105	2073087-2073933	1260724-1261267	1261263-1262094	2179541-2180201	2178189-2179545	-	-	-	1103243-1105250	1102169-1103143	795809-797164	797270-797690	906881-907325	1876351-1877480	6541-8085	2455450-2457187	1317732-1319084	-	-	-
Vd457	16	2903314-2904754	-	-	-	-	2863167-2863899	2300641-2300920	3421-4267	-	-	1384969-1385629	1383617-1384973	-	2830143-2830629	-	2758127-2760134	2760234-2761208	325353-326708	324827-325247	684081-684525	692417-693546	9727-11271	1877152-1878889	95706-97058	-	-	-
Vd458	15	2829063-2830503	-	-	-	-	2811441-2812173	2213011-2213290	11737-12583	-	-	1296956-1297616	1295604-1296960	-	-	-	2670753-2672760	2672860-2673834	241667-243022	241141-241561	599565-600009	607905-609034	18043-19587	1791744-1793481	2763681-2765033	-	-	-
Vd459	15	2861459-2862899	-	-	-	-	2855658-2856390	1024585-1024864	3423-4269	-	-	2199166-2199826	2199822-2201178	-	-	-	1482286-1484293	1484393-1485367	241191-242546	240665-241085	599335-599779	607675-608804	9729-11273	1707689-1709426	1575461-1576813	-	-	-
Vd460	15	2812639-2814079	-	-	-	-	2830701-2831433	2242630-2242909	3546-4392	-	-	1301641-1302301	1300289-1301645	-	-	-	2700208-2702215	2702315-2703289	242978-244333	242452-242872	600805-601249	609141-610270	9852-11396	1793780-1795517	2793255-2794607	-	-	-
Vd461	15	2816437-2817877	-	-	-	-	2807615-2808347	2291835-2292114	3439-4285	-	-	1379026-1379686	1377674-1379030	-	-	-	2749073-2751080	2751180-2752154	319605-320960	319079-319499	677990-678434	686337-687466	9745-11289	1869422-1871159	91106-92458	-	-	-
Vd462	15	2844165-2845605	-	-	-	-	2839920-2840652	2247090-2247369	4071-4917	-	-	1295792-1296452	1294440-1295796	-	-	-	2704680-2706687	2706787-2707761	241295-242650	240769-241189	599050-599494	607374-608503	10377-11921	1791507-1793244	2797446-2798632	-	-	-
Vd463	15	2835429-2836869	-	-	-	-	2823932-2824664	2214473-2214752	3554-4400	-	-	1301055-1301715	1299703-1301059	-	-	-	2672123-2674130	2674230-2675204	241531-242886	241005-241425	599562-600006	608410-609539	9860-11404	1792204-1793941	2765184-2766536	-	-	-
Vd464	15	2846532-2847972	-	-	-	-	2830124-2830856	2242711-2242990	3421-4267	-	-	1301433-1302093	1300081-1301437	-	-	-	2700315-2702322	2702422-2703396	242978-244333	242452-242872	600805-601249	609141-610270	9727-11271	1793376-1795113	2793463-2794815	-	-	-
Vd465	15	2816580-2818020	-	-	-	-	2824211-2824943	2247440-2247719	3944-4790	-	-	1300707-1301367	1299355-1300711	-	-	-	2705094-2707101	2707201-2708175	241833-243188	241307-241727	599839-600283	608195-609324	10250-11794	1791675-1793412	2798151-2799503	-	-	-
Vd466	20	2858269-2859709	-	-	2847229-2848024	-	1681029-1681761	2337377-2337656	3427-4273	2848116-2848659	2848655-2849486	1400241-1400901	1398889-1400245	-	-	1697452-1697947	2794751-2796758	2796858-2797832	313766-315121	313240-313660	671105-671549	679453-680582	9733-11277	1908747-1910484	85327-86679	-	-	1499856-1501775
Vd467	15	2822920-2824360	-	-	-	-	2814347-2815079	2244451-2244730	3554-4400	-	-	1302486-1303146	1301134-1302490	-	-	-	2702287-2704294	2704394-2705368	243054-244409	242528-242948	601158-601602	609510-610639	9860-11404	1814471-1816208	2795455-2796807	-	-	-
Vd468	15	2847558-2848998	-	-	-	-	2836582-2837314	2214900-2215179	3421-4267	-	-	1300552-1301212	1299200-1300556	-	-	-	2672256-2674263	2674363-2675337	241773-243128	241247-241667	599586-600030	607922-609051	9727-11271	1792495-1794232	2765360-2766712	-	-	-
Vd469	15	2838472-2839912	-	-	-	-	2813083-2813815	2297248-2297527	4071-4917	-	-	1385973-1386633	1384621-1385977	-	-	-	2754897-2756904	2757004-2757978	326103-327458	325577-325997	685325-685769	693665-694794	10377-11921	1876749-1878486	96358-97710	-	-	-
Vd470	15	2843586-2845026	-	-	-	-	2822564-2823296	2297226-2297505	3944-4790	-	-	1383851-1384511	1382499-1383855	-	-	-	2755104-2757111	2757211-2758185	324959-326314	324433-324853	683108-683552	691460-692589	10250-11794	1874735-1876472	96427-97779	-	-	-
Vd471	15	2811880-2813320	-	-	-	-	2851606-2852338	1025754-1026033	5885-6731	-	-	2195010-2195670	2195666-2197022	-	-	-	1483485-1485492	1485592-1486566	242079-243434	241553-241973	600394-600838	608746-609875	12191-13735	1702943-1704680	1576662-1578014	-	-	-
Vd472	15	2831596-2833036	-	-	-	-	2811633-2812365	2352096-2352375	3552-4398	-	-	1434515-1435175	1433163-1434519	-	-	-	53785-55792	55892-56866	375152-376507	374626-375046	733111-733555	741459-742588	9858-11402	1925940-1927677	146572-147924	-	-	-
Vd473	16	2896744-2898184	-	-	-	-	2826611-2827343	2318091-2318370	3425-4271	-	-	1406405-1407065	1405053-1406409	-	2864352-2864838	-	25774-27781	27881-28855	346871-348226	346345-346765	705225-705669	713544-714673	9731-11275	1898143-1899880	118513-119865	-	-	-
Vd474	13	2856787-2858227	-	-	-	-	2818520-2819252	1000889-1001168	-	-	-	2173965-2174625	2174621-2175977	-	-	-	1458525-1460532	1460632-1461606	217892-219247	217366-217786	575755-576199	584091-585220	-	1680724-1682461	1551582-1552934	-	-	-
Vd475	15	2868725-2870165	-	-	-	-	2830159-2830891	2215522-2215801	3550-4396	-	-	1302113-1302773	1300761-1302117	-	-	-	2673242-2675249	2675349-2676323	243123-244478	242597-243017	601058-601502	609402-610531	9856-11400	1793083-1794820	2766412-2767764	-	-	-
Vd476	15	2846882-2848322	-	-	-	-	2838699-2839431	2214071-2214350	4071-4917	-	-	1295147-1295807	1293795-1295151	-	-	-	2671337-2673344	2673444-2674418	241980-243335	241454-241874	599935-600379	608267-609396	10377-11921	1753380-1755117	2764398-2765750	-	-	-
Vd477	15	2841892-2843332	-	-	-	-	2851219-2851951	2251274-2251553	3944-4790	-	-	1302107-1302767	1300755-1302111	-	-	-	2709039-2711046	2711146-2712120	243010-244365	242484-242904	601219-601663	609567-610696	10250-11794	1794389-1796126	2802158-2803510	-	-	-
Vd478	15	2849112-2850552	-	-	-	-	2852981-2853713	2218286-2218565	3421-4267	-	-	1299817-1300477	1298465-1299821	-	-	-	2675841-2677848	2677948-2678922	241123-242478	240597-241017	599162-599606	607498-608627	9727-11271	1792088-1793825	2768989-2770341	-	-	-
Vd479	16	2864001-2865441	-	-	-	-	2860371-2861103	2329202-2329481	3560-4406	-	-	1407310-1407970	1405958-1407314	-	2844076-2844562	-	25965-27972	28072-29046	347784-349139	347258-347678	706372-706816	714736-715865	9866-11410	1898464-1900201	119196-120548	-	-	-
Vd480	15	2849622-2851062	-	-	-	-	2812556-2813288	2219580-2219859	4071-4917	-	-	1300728-1301388	1299376-1300732	-	-	-	2677025-2679032	2679132-2680106	241913-243268	241387-241807	600102-600546	608438-609567	10377-11921	1793375-1795112	2770082-2771434	-	-	-
Vd481	15	2856391-2857831	-	-	-	-	2807604-2808336	2212760-2213039	3552-4398	-	-	1301199-1301859	1299847-1301203	-	-	-	2670379-2672386	2672486-2673460	241808-243163	241282-241702	599985-600429	608333-609462	9858-11402	1792123-1793860	2763316-2764668	-	-	-

## Sheet: VFDB_Abricate
Isolate_ID	NUM_FOUND	adsA	aur	cap8A	cap8B	cap8C	cap8D	cap8E	cap8F	cap8G	cap8L	cap8M	cap8N	cap8O	cap8P	chp	clfA	clfB	clpP	coa	ebp	esaA	esaB	esaC	essA	essB	essC	esxA	esxB	fnbA	geh	hlb	hld	hlgA	hlgB	hlgC	hly/hla	hysA	icaA	icaB	icaC	icaD	icaR	isdA	isdB	isdC	isdD	isdE	isdF
AT513	65	2800155-2802473	2682343-2683872	123831-124347	124515-125201	125204-125968	125988-127811	127801-128829	128842-129951	129955-131079	135201-136406	136417-136974	136974-137861	137915-139177	139254-140399	-	828845-831264	2672637-2675270	791745-792307	222016-223133	1497175-1498635	283964-286993	287423-287665	293757-294149	286993-287451	287678-288838	289288-293727	283588-283881	294165-294479	2528358-2531157	321207-323141	2043737-2044560	2058043-2058177	2439948-2440877	2442393-2443370	2441444-2442391	1117219-1118178	2235424-2237844	2724839-2726077	2726343-2727215	2727202-2728254	2726041-2726346	2724115-2724675	1084462-1085514	2846357-2848294	1085723-1086406	1086406-1087482	1087479-1088357	1088370-1089335
AT514	65	2708061-2710379	2590249-2591778	28803-29319	29487-30173	30176-30940	30960-32783	32773-33801	33814-34923	34927-36051	40173-41378	41389-41946	41946-42833	42887-44149	44226-45371	-	730696-733115	2580543-2583176	693575-694137	126996-128113	1398192-1399652	188944-191973	192403-192645	198745-199137	191973-192431	192658-193818	194276-198715	188568-188861	199153-199467	2436488-2439287	226195-228270	1951717-1952540	1966039-1966173	2348184-2349113	2350629-2351606	2349680-2350627	1018894-1019853	2143457-2145877	2632745-2633983	2634249-2635121	2635108-2636160	2633947-2634252	2632021-2632581	986383-987435	1904042-1905979	987644-988327	988327-989403	989400-990278	990291-991256
AT515	65	2676653-2678971	2558841-2560370	28791-29307	29475-30161	30164-30928	30948-32771	32761-33789	33802-34911	34915-36039	40161-41366	41377-41934	41934-42821	42875-44137	44214-45359	-	729981-732400	2549135-2551768	692876-693438	126976-128093	1397774-1399234	188924-191953	192383-192625	198716-199108	191953-192411	192638-193798	194247-198686	188548-188841	199124-199438	2405088-2407887	226166-228241	1919851-1920674	1934157-1934291	2316758-2317687	2319203-2320180	2318254-2319201	1018123-1019082	2111794-2114214	2601337-2602575	2602841-2603713	2603700-2604752	2602539-2602844	2600613-2601173	985623-986675	2815403-2817340	986884-987567	987567-988643	988640-989518	989531-990496
AT516	63	2692318-2694636	2574506-2576035	43786-44302	42932-43618	42165-42929	40322-42145	39304-40332	38182-39291	37054-38178	31727-32932	31159-31716	30272-31159	28956-30218	27734-28879	-	728827-731246	2564800-2567433	691719-692281	128184-129301	1428347-1429807	190264-193293	193723-193965	200061-200453	193293-193751	193978-195138	195592-200031	189888-190181	200469-200783	2420749-2423548	227511-229586	1935755-1936578	1950069-1950203	2332449-2333378	2334894-2335871	2333945-2334892	1048812-1049771	2127726-2130146	2617002-2618240	2618506-2619378	2619365-2620417	2618204-2618509	2616278-2616838	1016305-1017357	1013908-1015845	1017566-1018249	1018249-1019325	1019322-1020200	1020213-1021178
AT517	62	2680439-2682757	2562778-2564307	28785-29301	29469-30155	30158-30922	30942-32765	32755-33783	33796-34905	34909-36033	40155-41360	41371-41928	41928-42815	42869-44131	44208-45353	-	724631-727050	2553072-2555705	687534-688096	127092-128209	1417054-1418514	189040-192069	192499-192741	198829-199221	192069-192527	192754-193914	194360-198799	188664-188957	199237-199551	2409034-2411833	226540-228615	1925752-1925934	1938041-1938175	2320653-2321582	2323098-2324075	2322149-2323096	1047674-1048633	2115913-2118333	2605123-2606361	2606627-2607499	2607486-2608538	2606325-2606630	2604399-2604959	1015175-1016227	-	1016436-1017119	1017119-1018195	1018192-1019070	1019083-1020048
AT518	65	2683094-2685412	2565209-2566738	5505-6021	6189-6875	6878-7642	7662-9485	9475-10503	10516-11625	11629-12753	16875-18080	18091-18648	18648-19535	19589-20851	20928-22073	-	706515-709242	2555503-2558136	669407-669969	103694-104811	1404905-1406365	165642-168671	169101-169343	175439-175831	168671-169129	169356-170516	170970-175409	165266-165559	175847-176161	2411452-2414251	202889-204964	1926763-1927586	1941077-1941211	2323152-2324081	2325597-2326574	2324648-2325595	1025629-1026588	2118429-2120849	2607705-2608943	2609209-2610081	2610068-2611120	2608907-2609212	2606981-2607541	993384-994436	990986-992923	994645-995328	995328-996404	996401-997279	997292-998257
AT520	65	2685878-2688196	2568066-2569595	5505-6021	6189-6875	6878-7642	7662-9485	9475-10503	10516-11625	11629-12753	16875-18080	18091-18648	18648-19535	19589-20851	20928-22073	-	707702-710121	2558360-2560993	670497-671059	103694-104811	1407189-1408649	165642-168671	169101-169343	175438-175830	168671-169129	169356-170516	170969-175408	165266-165559	175846-176160	2414309-2417108	202888-204963	1896438-1897261	1910752-1910886	2326009-2326938	2328454-2329431	2327505-2328452	1027673-1028632	2120894-2123314	2610562-2611800	2612066-2612938	2612925-2613977	2611764-2612069	2609838-2610398	995169-996221	992771-994708	996430-997113	997113-998189	998186-999064	999077-1000042
BE601	65	1218415-1220733	364603-366132	1102789-1103305	1103473-1104159	1104162-1104926	1104946-1106769	1106759-1107787	1107800-1108909	1108913-1110037	1114159-1115364	1115375-1115932	1115932-1116819	1116873-1118135	1118212-1119357	-	2513224-2515643	373205-375838	2714119-2714681	272603-273720	2140873-2142333	208743-211772	208071-208313	887352-887744	208285-208743	206898-208058	887774-892213	211855-212148	887022-887336	201487-204286	858219-860294	314525-315348	1089781-1089915	965955-966884	963462-964439	964441-965388	2813272-2814231	1854421-1856841	322398-323636	321260-322132	320221-321273	322129-322434	323800-324360	1046346-1047398	2851971-2853908	1047607-1048290	1048290-1049366	1049363-1050241	1050254-1051219
BE602	65	2783266-2785584	2665243-2666772	149842-150358	148988-149674	148221-148985	146378-148201	145360-146388	144238-145347	143110-144234	137783-138988	137215-137772	136328-137215	135012-136274	133790-134935	-	836494-838913	2655537-2658170	799436-799998	234230-235347	1504260-1505720	296178-299207	299637-299879	305955-306347	299207-299665	299892-301052	301486-305925	295802-296095	306363-306677	2511507-2514306	333405-335480	2025985-2026808	2040259-2040393	2423227-2424156	2425672-2426649	2424723-2425670	1125209-1126168	2218381-2220801	2707739-2708977	2709243-2710115	2710102-2711154	2708941-2709246	2707015-2707575	1092636-1093688	2818031-2819968	1093897-1094580	1094580-1095656	1095653-1096531	1096544-1097509
BE603	65	93150-95468	2731989-2733518	209978-210494	210662-211348	211351-212115	212135-213958	213948-214976	214989-216098	216102-217226	221348-222553	222564-223121	223121-224008	224062-225324	225401-226546	-	909979-912398	2722283-2724916	872871-873433	308167-309284	1577825-1579285	370115-373144	373574-373816	379912-380304	373144-373602	373829-374989	375443-379882	369739-370032	380320-380634	2578232-2581031	407362-409437	2093209-2094032	2107523-2107657	2489913-2490842	2492358-2493335	2491409-2492356	1198724-1199683	2285176-2287596	2774485-2775723	2775989-2776861	2776848-2777900	2775687-2775992	2773761-2774321	1166217-1167269	2809391-2811328	1167478-1168161	1168161-1169237	1169234-1170112	1170125-1171090
BE604	65	1228292-1230610	1346893-1348422	709862-710378	709008-709694	708241-709005	706398-708221	705380-706408	704258-705367	703130-704254	697803-699008	697235-697792	696348-697235	695032-696294	693810-694955	-	1559314-1561733	1355495-1358128	1779043-1779605	622421-623538	2759847-2761307	684369-687398	687828-688070	1687683-1688075	687398-687856	688083-689243	1688105-1692544	683993-684286	1687353-1687667	1053899-1056698	1658550-1660625	1876278-1877101	2056768-2056902	1486455-1487384	1483962-1484939	1484941-1485888	2420373-2421332	218341-220761	1304688-1305926	1303550-1304422	1302511-1303563	1304419-1304724	1306090-1306650	929966-931018	1528375-1530312	931227-931910	931910-932986	932983-933861	933874-934839
BE605	65	293478-295796	366339-367868	28737-29253	29421-30107	30110-30874	30894-32717	32707-33735	33748-34857	34861-35985	40107-41312	41323-41880	41880-42767	42821-44083	44160-45305	-	1560371-1562790	356633-359266	2509277-2509839	181565-182682	2469621-2471081	117705-120734	117033-117275	2661111-2661503	117247-117705	115860-117020	2661533-2665972	120817-121110	2660781-2661095	1310707-1313506	2631978-2634053	1407814-1408637	1208134-1208268	1122661-1123590	1125106-1126083	1124157-1125104	2816291-2817250	484819-487239	408835-410073	410339-411211	411198-412250	410037-410342	408111-408671	414669-415721	2852909-2854846	415930-416613	416613-417689	417686-418564	418577-419542
BE606	65	69933-72251	2740790-2742319	210650-211166	211334-212020	212023-212787	212807-214630	214620-215648	215661-216770	216774-217898	222020-223225	223236-223793	223793-224680	224734-225996	226073-227218	-	911966-914385	2731084-2733717	874835-875397	308848-309965	1584008-1585468	370796-373825	374255-374497	380601-380993	373825-374283	374510-375670	376132-380571	370420-370713	381009-381323	2587026-2589825	408051-410126	2102168-2102991	2116498-2116632	2498663-2499592	2501108-2502085	2500159-2501106	1200558-1201517	2293927-2296347	2783286-2784524	2784790-2785662	2785649-2786701	2784488-2784793	2782562-2783122	1168043-1169095	2818264-2820201	1169304-1169987	1169987-1171063	1171060-1171938	1171951-1172916
BE607	65	2797092-2799410	2679041-2680570	117092-117608	117776-118462	118465-119229	119249-121072	121062-122090	122103-123212	123216-124340	128462-129667	129678-130235	130235-131122	131176-132438	132515-133660	-	817943-820362	2669335-2671968	780546-781108	215417-216534	1485285-1486745	277365-280394	280824-281066	287172-287564	280394-280852	281079-282239	282703-287142	276989-277282	287580-287894	2525177-2527976	314622-316697	2039067-2039890	2053397-2053531	2436869-2437798	2439314-2440291	2438365-2439312	1106517-1107476	2232128-2234548	2721537-2722775	2723041-2723913	2723900-2724952	2722739-2723044	2720813-2721373	1074002-1075054	1991390-1993327	1075263-1075946	1075946-1077022	1077019-1077897	1077910-1078875
BE608	65	2578518-2580836	1165687-1167216	598265-598781	598949-599635	599638-600402	600422-602245	602235-603263	603276-604385	604389-605513	609635-610840	610851-611408	611408-612295	612349-613611	613688-614833	-	2421722-2424141	1174289-1176922	2724580-2725142	77652-78769	10083-11543	13792-16821	13120-13362	2416408-2416800	13334-13792	11947-13107	2416830-2421269	16904-17197	2416078-2416392	133310-136109	2387275-2389350	1585442-1586265	2091388-2091522	737465-738394	734972-735949	735951-736898	2691521-2692480	1389854-1392274	1123482-1124720	1122344-1123216	1121305-1122357	1123213-1123518	1124884-1125444	2267135-2268187	2851503-2853440	2268396-2269079	2269079-2270155	2270152-2271030	2271043-2272008
BE609	65	1483581-1485899	252723-254252	187388-187904	186534-187220	185767-186531	183924-185747	182906-183934	181784-182893	180656-181780	175329-176534	174761-175318	173874-174761	172558-173820	171336-172481	-	1805249-1807668	243017-245650	640362-640924	479412-480529	1971135-1972595	541359-544388	544818-545060	2567907-2568299	544388-544846	545073-546233	2568329-2572768	540983-541276	2567577-2567891	392725-395524	2538688-2540763	898459-899282	785074-785208	1299557-1300486	1302002-1302979	1301053-1302000	2477204-2478163	951411-953831	295219-296457	296723-297595	297582-298634	296421-296726	294495-295055	741651-742703	1256450-1258387	742912-743595	743595-744671	744668-745546	745559-746524
BE610	65	2782426-2784744	2664383-2665912	134872-135388	135556-136242	136245-137009	137029-138852	138842-139870	139883-140992	140996-142120	146242-147447	147458-148015	148015-148902	148956-150218	150295-151440	-	836116-838535	2654677-2657310	798932-799494	233062-234179	1507831-1509291	295010-298039	298469-298711	304807-305199	298039-298497	298724-299884	300338-304777	294634-294927	305215-305529	2510627-2513426	332257-334332	2025819-2026642	2040133-2040267	2422266-2423195	2424711-2425688	2423762-2424709	1124889-1125848	2217529-2219949	2706879-2708117	2708383-2709255	2709242-2710294	2708081-2708386	2706155-2706715	1092261-1093313	2817211-2819148	1093522-1094205	1094205-1095281	1095278-1096156	1096169-1097134
BE611	65	69933-72251	2742046-2743575	225864-226380	225010-225696	224243-225007	222400-224223	221382-222410	220260-221369	219132-220256	213805-215010	213237-213794	212350-213237	211034-212296	209812-210957	-	913809-916228	2732340-2734973	876680-877242	310266-311383	1581231-1582691	372213-375242	375672-375914	382020-382412	375242-375700	375927-377087	377551-381990	371837-372130	382428-382742	2588282-2591081	409470-411545	2103286-2104109	2117616-2117750	2499839-2500768	2502284-2503261	2501335-2502282	1202865-1203824	2295098-2297518	2784542-2785780	2786046-2786918	2786905-2787957	2785744-2786049	2783818-2784378	1170350-1171402	2819456-2821393	1171611-1172294	1172294-1173370	1173367-1174245	1174258-1175223
BG560	63	2080905-2083223	2199606-2201135	939738-940254	938882-939568	938115-938879	936272-938095	935254-936282	934132-935241	933004-934128	927677-928882	927109-927666	926222-927109	924906-926168	923684-924829	-	1928207-1930626	2208208-2210583	1959595-1960157	1324843-1325960	1796335-1797795	1386791-1389820	1390250-1390492	2426084-2426476	1389820-1390278	1390505-1391665	2426506-2430945	1386415-1386708	2425754-2426068	1005715-1008514	2396951-2399026	908603-909426	1281191-1281325	2485405-2486334	2487850-2488827	2486901-2487848	2264210-2265169	605957-608377	2157401-2158639	2156263-2157135	2155224-2156276	2157132-2157437	2158803-2159363	2682776-2683828	2689174-2691111	2681884-2682567	2680808-2681884	2679933-2680811	2678955-2679920
CZ575	65	2692056-2694374	2574105-2575634	29393-29909	30077-30763	30766-31530	31550-33373	33363-34391	34404-35513	35517-36641	40763-41968	41979-42536	42536-43423	43477-44739	44816-45961	-	729997-732416	2564657-2567032	692848-693410	127846-128963	1405988-1407448	190024-193053	193483-193725	199821-200213	193053-193511	193738-194898	195352-199791	189648-189941	200229-200543	2420385-2423184	227270-229345	1935028-1935851	1949342-1949476	2331737-2332666	2334182-2335159	2333233-2334180	1026005-1026964	2126898-2129318	2616601-2617839	2618105-2618977	2618964-2620016	2617803-2618108	2615877-2616437	993410-994462	991012-992949	994671-995354	995354-996430	996427-997305	997318-998283
DE509	65	73459-75777	2732252-2733781	191195-191711	191879-192565	192568-193332	193352-195175	195165-195276	196320-197429	197433-198557	202679-203884	203895-204452	204452-205339	205393-206655	206732-207877	-	872735-875154	2722804-2725179	835633-836195	289494-290611	1570910-1572370	351442-354471	354901-355143	361235-361627	354471-354929	355156-356316	356766-361205	351066-351359	361643-361957	2578536-2581335	388174-390249	2093601-2094424	2107907-2108041	2490549-2491478	2492994-2493971	2492045-2492992	1191844-1192803	2285246-2287666	2774748-2775986	2776252-2777124	2777111-2778163	2775950-2776255	2774024-2774584	1159341-1160393	1156947-1158884	1160602-1161285	1161285-1162361	1162358-1163236	1163249-1164214
DE801	50	47403-49721	2603060-2604589	-	-	-	-	-	-	-	-	-	-	-	-	-	793309-795728	2593792-2595987	756212-756774	190961-192078	1497346-1498806	252909-255938	256368-256610	262697-263089	255938-256396	256623-257783	258228-262667	252533-252826	263105-263419	2452792-2455591	290146-292221	1968130-1969122	1983728-1983862	2364313-2365242	2366758-2367735	2365809-2366756	1118003-1118962	2161042-2163462	2645556-2646794	2647060-2647932	2647919-2648971	2646758-2647063	2644832-2645392	1085505-1086557	1083365-1085302	1086766-1087449	1087449-1088525	1088522-1089400	1089413-1090378
DE802	60	2077839-2080157	1521714-1523243	557917-558433	558601-559287	559290-560054	560074-561897	561887-562915	562928-564037	564041-565165	569287-570492	570503-571060	571060-571947	572001-573263	573340-574485	-	2276654-2279073	1512008-1514641	461434-461996	130996-132113	286-1746	192944-195973	196403-196645	1493102-1493494	195973-196431	196658-197818	1493524-1497963	192568-192861	1492772-1493086	1682066-1684865	1463865-1465940	1321002-1321994	1638244-1638378	2731080-2732009	2733525-2734502	2732576-2733523	2486967-2487926	2526635-2529055	1564210-1565448	1565714-1566586	1566573-1567625	1565412-1565717	1563486-1564046	1070262-1071314	1068122-1070059	1071523-1072206	1072206-1073282	1073279-1074157	1074170-1075135
DE803	63	2659252-2661570	2541440-2542969	28809-29325	29493-30179	30182-30946	30966-32789	32779-33807	33820-34929	34933-36057	40179-41384	41395-41952	41952-42839	42893-44155	44232-45377	-	729237-731656	2531734-2534367	692016-692578	127007-128124	1418292-1419752	189038-192067	192497-192739	198843-199235	192067-192525	192752-193912	194374-198813	188662-188955	199251-199565	2387832-2390631	226293-228368	1923626-1924449	1937957-1938091	2299387-2300316	2301832-2302809	2300883-2301830	1039040-1039999	2095390-2097810	2583936-2585174	2585440-2586312	2586299-2587351	2585138-2585443	2583212-2583772	1006118-1007170	2806389-2808326	1007379-1008062	1008062-1009138	1009135-1010013	1010026-1010991
DE804	62	2722148-2724466	2604336-2605865	80229-80745	80913-81599	81602-82366	82386-84209	84199-85227	85240-86349	86353-87477	91599-92804	92815-93372	93372-94259	94313-95575	95652-96797	-	775300-777719	2594630-2597263	744024-744586	178672-179789	1437513-1438973	240620-243649	244079-244321	250512-250904	243649-244107	244334-245494	246043-250482	240244-240537	250920-251234	2444921-2447720	277962-280037	1936946-1937938	1995355-1995489	2356506-2357435	2358951-2359928	2358002-2358949	1060376-1061335	2151822-2154242	2646832-2648070	2648336-2649208	2649195-2650247	2648034-2648339	2646108-2646668	1027613-1028665	1025473-1027410	1028874-1029557	1029557-1030633	1030630-1031508	1031521-1032486
DE805	65	2713566-2715884	2595748-2597277	28797-29313	29481-30167	30170-30934	30954-32777	32767-33795	33808-34917	34921-36045	40167-41372	41383-41940	41940-42827	42881-44143	44220-45365	1916328-1916777	730973-733592	2586042-2588675	693604-694166	126987-128104	1436791-1438251	189063-192092	192522-192764	198860-199252	192092-192550	192777-193937	194391-198830	188687-188980	199268-199582	2441857-2444656	226310-228385	1956725-1957548	1971040-1971174	2353033-2353962	2355478-2356455	2354529-2355476	1057905-1058864	2148493-2150913	2638244-2639482	2639748-2640620	2640607-2641659	2639446-2639751	2637520-2638080	1025399-1026451	1023259-1025196	1026660-1027343	1027343-1028419	1028416-1029294	1029307-1030272
DE806	62	1516466-1518784	1398654-1400183	28797-29313	29481-30167	30170-30934	30954-32777	32767-33795	33808-34917	34921-36045	40167-41372	41383-41940	41940-42827	42881-44143	44220-45365	-	2805156-2807575	1388948-1391581	728852-729414	126987-128104	2136912-2138372	188935-191964	192394-192636	198732-199124	191964-192422	192649-193809	194263-198702	188559-188852	199140-199454	1244898-1247697	226182-228116	1631268-1632091	774100-774234	1156121-1157050	1158566-1159543	1157617-1158564	2517203-2518162	951179-953599	1441150-1442388	1442654-1443526	1443513-1444565	1442352-1442657	1440426-1440986	2549616-2550668	2843424-2845361	2548724-2549407	2547648-2548724	2546773-2547651	2545795-2546760
DE807	65	1621196-1623514	1739797-1741326	682275-682791	681421-682107	680654-681418	678811-680634	677793-678821	676671-677780	675543-676667	670216-671421	669648-670205	668761-669648	667445-668707	666223-667368	-	-	1748399-1751032	2665287-2665849	1235863-1236980	509080-510540	1172003-1175032	1171331-1171573	572266-572658	1171545-1172003	1170158-1171318	567797-572236	1175115-1175408	572674-572988	114907-117706	599716-601791	1504276-1505099	1589839-1589973	2001550-2002479	1999057-2000034	2000036-2000983	2249016-2249975	2204585-2207005	1697592-1698830	1696454-1697326	1695415-1696467	1697323-1697628	1698994-1699554	2819796-2820848	1810539-1812476	2821057-2821740	2821740-2822816	2822813-2823691	2823704-2824669
DE808	65	130996-133314	249597-251126	492603-493119	491749-492435	490982-491746	489139-490962	488121-489149	486999-488108	485871-486995	480544-481749	479976-480533	479089-479976	477773-479035	476551-477696	-	-	258199-260832	2142076-2142638	94736-95853	1231819-1233279	30876-33905	30204-30446	1358514-1358906	30418-30876	29031-30191	1358936-1363375	33988-34281	1358184-1358498	728773-731572	1329381-1331456	1515896-1516719	1371053-1371187	1976242-1977171	1978687-1979664	1977738-1978685	2051499-2052458	1771779-1774199	207392-208630	206254-207126	205215-206267	207123-207428	208794-209354	1695531-1696583	2853144-2855081	1696792-1697475	1697475-1698551	1698548-1699426	1699439-1700404
DE809	65	1818816-1821134	1937416-1938945	2327276-2327792	2327960-2328646	2328649-2329413	2329433-2331256	2331246-2332274	2332287-2333396	2333400-2334524	2338646-2339851	2339862-2340419	2340419-2341306	2341360-2342622	2342699-2343844	-	667214-669633	1946018-1948393	2260073-2260635	546116-547233	797513-798973	482256-485285	481584-481826	2122601-2122993	481798-482256	480411-481571	2123023-2127462	485368-485661	2122271-2122585	53308-56107	2093979-2096054	964837-965660	945161-945295	1088925-1089854	1086432-1087409	1087411-1088358	1707920-1708879	617608-620028	1895212-1896450	1894074-1894946	1893035-1894087	1894943-1895248	1896614-1897174	2393344-2394396	2031769-2033706	2394605-2395288	2395288-2396364	2396361-2397239	2397252-2398217
DE810	64	1222134-1224452	1104322-1105851	1806453-1806969	1807137-1807823	1807826-1808590	1808610-1810433	1810423-1811451	1811464-1812573	1812577-1813701	1817823-1819028	1819039-1819596	1819596-1820483	1820537-1821799	1821876-1823021	-	-	1094616-1097249	865568-866130	1524745-1525862	189026-190486	832276-835305	831604-831846	2599905-2600297	831818-832276	830431-831591	2595436-2599875	835388-835681	2600313-2600627	130016-132815	2627355-2629430	2387845-2388668	534542-534676	2268243-2269172	2265750-2266727	2266729-2267676	2593260-2594219	658998-661418	1146818-1148056	1148322-1149194	1149181-1150233	1148020-1148325	1146094-1146654	1012709-1013761	1917452-1919389	1013970-1014653	1014653-1015729	1015726-1016604	1016617-1017582
DE811	63	2213682-2216000	2095870-2097399	2780810-2781326	2779956-2780642	2779189-2779953	2777346-2779169	2776328-2777356	2775206-2776315	2774078-2775202	2768751-2769956	2768183-2768740	2767296-2768183	2765980-2767242	2764758-2765903	-	-	2086164-2088797	2334002-2334564	526569-527686	1550874-1552334	213160-216189	216619-216861	345605-345997	216189-216647	216874-218034	341136-345575	212784-213077	346013-346327	645027-647826	373055-374989	2552184-2553007	935106-935240	1453084-1454013	1455529-1456506	1454580-1455527	2560967-2561926	1248466-1250886	2138366-2139604	2139870-2140742	2140729-2141781	2139568-2139873	2137642-2138202	200-1252	2686580-2688517	1461-2144	2144-3220	3217-4095	4108-5073
DE812	62	1665389-1667707	1783991-1785520	2744885-2745401	2745569-2746255	2746258-2747022	2747042-2748865	2748855-2749883	2749896-2751005	2751009-2752133	2756255-2757460	2757471-2758028	2758028-2758915	2758969-2760231	2760308-2761453	-	1980489-1982908	1792593-1795226	1883303-1883865	55706-56823	459349-460809	117654-120683	121113-121355	-	120683-121141	121368-122528	271469-275908	117278-117571	-	995758-998557	2045601-2047535	2022422-2023245	1028358-1028492	2340311-2341240	2337818-2338795	2338797-2339744	2208477-2209436	615112-617532	1741785-1743023	1740647-1741519	1739608-1740660	1741516-1741821	1743187-1743747	1443758-1444810	2837972-2839909	1442866-1443549	1441790-1442866	1440915-1441793	1439937-1440902
DE813	61	2724743-2727061	2606931-2608460	105378-105894	106062-106748	106751-107515	107535-109358	109348-110376	110389-111498	111502-112626	116983-118188	118199-118756	118756-119643	119697-120959	121036-122181	-	786324-788943	2597225-2599858	748507-749069	204012-205129	1493090-1494550	266165-269194	269624-269866	275938-276330	269194-269652	269879-271039	271515-275954	265789-266082	276346-276660	2452732-2455531	303388-305463	1989009-1990000	2003446-2003580	2364394-2365323	2366839-2367816	2365890-2366837	1114094-1115053	2160054-2162474	2649427-2650665	2650931-2651803	2651790-2652842	2650629-2650934	2648703-2649263	1081746-1082798	1079606-1081543	1083007-1083690	1083690-1084766	1084763-1085641	1085654-1086619
DE814	63	2277518-2279836	2396119-2397648	2835664-2836180	2834810-2835496	2834043-2834807	2832200-2834023	2831182-2832210	2830060-2831169	2828932-2830056	2823605-2824810	2823037-2823594	2822150-2823037	2820834-2822096	2819612-2820757	2543188-2543637	1058490-1061073	2404721-2407354	815064-815626	308667-309784	903357-904817	370615-373644	374074-374316	271093-271485	373644-374102	374329-375489	1929681-1934120	370239-370532	270763-271077	115320-118119	241960-244035	2502417-2503240	2468066-2468200	1401629-1402558	1399136-1400113	1400115-1401062	2123269-2124228	1604696-1607116	2353914-2355152	2352776-2353648	2351737-2352789	2353645-2353950	2355316-2355876	626193-627245	627448-629385	625301-625984	624225-625301	623350-624228	622372-623337
DE815	63	2136360-2138678	2254961-2256490	873119-873635	872265-872951	871498-872262	869655-871478	868637-869665	867515-868624	866387-867511	861060-862265	860492-861049	859605-860492	858289-859551	857067-858212	-	-	2263563-2266196	1790279-1790841	497740-498857	331546-333006	559688-562717	563147-563389	1929259-1929651	562717-563175	563402-564562	2212207-2216646	559312-559605	1928929-1929243	699833-702632	1900126-1902201	1982581-1983404	2089464-2089598	952552-953481	950059-951036	951038-951985	2752808-2753767	2464280-2466700	2212756-2213994	2211618-2212490	2210579-2211631	2212487-2212792	2214158-2214718	2078485-2079537	2107900-2109837	2077593-2078276	2076517-2077593	2075642-2076520	2074664-2075629
DE816	65	601364-603682	483552-485081	1189114-1189630	1189798-1190484	1190487-1191251	1191271-1193094	1193084-1194112	1194125-1195234	1195238-1196362	1200484-1201689	1201700-1202257	1202257-1203144	1203198-1204460	1204537-1205682	-	2573052-2575471	474104-476479	2715963-2716525	912938-914055	2564794-2566254	974886-977915	978345-978587	2211785-2212177	977915-978373	978600-979760	2099653-2104092	974510-974803	2211455-2211769	875314-878113	2182652-2184727	2222776-2223599	2032937-2033071	1413441-1414370	1415886-1416863	1414937-1415884	1256875-1257834	374782-377202	526048-527286	527552-528424	528411-529463	527250-527555	525324-525884	680086-681138	311412-313349	681347-682030	682030-683106	683103-683981	683994-684959
DE817	65	2389308-2391626	2271496-2273025	302542-303058	301688-302374	300921-301685	299078-300901	298060-299088	296938-298047	295810-296934	290483-291688	289915-290472	289028-289915	287712-288974	286490-287635	-	1571940-1574359	2262048-2264423	2006086-2006648	957464-958581	923324-924784	1019412-1022441	1022871-1023113	2104122-2104514	1022441-1022899	1023126-1024286	2721030-2725469	1019036-1019329	2104530-2104844	1860084-1862883	2131061-2133136	2196090-2196913	1031781-1031915	138183-139112	135690-136667	136669-137616	2429363-2430322	1080903-1083323	2313992-2315230	2315496-2316368	2316355-2317407	2315194-2315499	2313268-2313828	1155764-1156816	1443482-1445419	1154872-1155555	1153796-1154872	1152921-1153799	1151943-1152908
DE818	65	2437860-2440178	2320048-2321577	2555447-2555963	2556131-2556817	2556820-2557584	2557604-2559427	2559417-2560445	2560458-2561567	2561571-2562695	2566817-2568022	2568033-2568590	2568590-2569477	2569531-2570793	2570870-2572015	-	463656-466075	2310600-2312975	426568-427130	2653778-2654895	1162580-1164040	2715726-2718755	2719185-2719427	2725499-2725891	2718755-2719213	2719440-2720600	277986-282425	2715350-2715643	2725907-2726221	2170165-2172964	2752438-2754513	1684292-1685115	1698558-1698692	2081663-2082592	2084108-2085085	2083159-2084106	783078-784037	1876053-1878473	2362544-2363782	2364048-2364920	2364907-2365959	2363746-2364051	2361820-2362380	750350-751402	747976-749913	751611-752294	752294-753370	753367-754245	754258-755223
DE819	65	2761509-2763827	2643570-2645099	112415-112931	113099-113785	113788-114552	114572-116395	116385-117413	117426-118535	118539-119663	123785-124990	125001-125558	125558-126445	126499-127761	127838-128983	-	812304-814723	2634122-2636497	775137-775699	210714-211831	1480431-1481891	272662-275691	276121-276363	282455-282847	275691-276149	276376-277536	194501-198940	272286-272579	282863-283177	2489854-2492653	309523-311598	2003009-2003832	2017315-2017449	2401386-2402315	2403831-2404808	2402882-2403829	1100520-1101479	2196133-2198553	2686096-2687334	2687600-2688472	2688459-2689511	2687298-2687603	2685372-2685932	1067904-1068956	2819728-2821665	1069165-1069848	1069848-1070924	1070921-1071799	1071812-1072777
DE820	64	2665333-2667651	2547521-2549050	28791-29307	29475-30161	30164-30928	30948-32771	32761-33789	33802-34911	34915-36039	40161-41366	41377-41934	41934-42821	42875-44137	44214-45359	-	724182-726879	2538073-2540448	687011-687573	126977-128094	1509892-1511352	189177-192206	192636-192878	198970-199362	192206-192664	192891-194051	2361491-2365930	188801-189094	199378-199692	2393805-2396604	226420-228495	1015757-1015939	1922993-1923127	2305378-2306307	2307823-2308800	2306874-2307821	1130357-1131316	2100332-2102752	2590017-2591255	2591521-2592393	2592380-2593432	2591219-2591524	2589293-2589853	1097854-1098906	-	1099115-1099798	1099798-1100874	1100871-1101749	1101762-1102727
DE821	65	1861328-1863646	1979929-1981458	1128428-1128944	1129112-1129798	1129801-1130565	1130585-1132408	1132398-1133426	1133439-1134548	1134552-1135676	1139798-1141003	1141014-1141571	1141571-1142458	1142512-1143774	1143851-1144996	-	-	1988531-1991164	2241640-2242202	75756-76873	697172-698632	137704-140733	141163-141405	2361069-2361461	140733-141191	141418-142578	278173-282612	137328-137621	2360739-2361053	145238-148037	2331936-2334011	2160110-2160933	1816147-1816281	2774692-2775621	2777137-2778114	2776188-2777135	2009646-2010605	1423918-1426338	1937724-1938962	1936586-1937458	1935547-1936599	1937455-1937760	1939126-1939686	1483988-1485040	1802829-1804766	1485249-1485932	1485932-1487008	1487005-1487883	1487896-1488861
DE822	65	2798505-2800823	2680513-2682042	112368-112884	113052-113738	113741-114505	114525-116348	116338-117366	117379-118488	118492-119616	123738-124943	124954-125511	125511-126398	126452-127714	127791-128936	-	813097-815516	2671407-2673440	776010-776572	210685-211802	1520053-1521513	272853-275882	276312-276554	282642-283034	275882-276340	276567-277727	1533806-1538245	272477-272770	283050-283364	2527332-2529942	310092-312167	2042140-2042963	2056803-2056937	2438651-2439580	2441096-2442073	2440147-2441094	1140672-1141631	2233615-2236035	2723189-2724427	2724693-2725565	2725552-2726604	2724391-2724696	2722465-2723025	1108173-1109225	1105783-1107720	1109434-1110117	1110117-1111193	1111190-1112068	1112081-1113046
DE823	64	1402799-1405117	1284909-1286438	552189-552705	552873-553559	553562-554326	554346-556169	556159-557187	557200-558309	558313-559437	563559-564764	564775-565332	565332-566219	566273-567535	567612-568757	-	393515-396212	1275461-1277836	2109907-2110469	1196447-1197564	1152512-1153972	346989-350018	346317-346559	1538275-1538667	346531-346989	345144-346304	301608-306047	350101-350394	1538683-1538997	141811-144610	1565725-1567800	2458495-2458677	1522211-1522345	1968433-1969362	1970878-1971855	1969929-1970876	2198924-2199883	90063-92483	1327483-1328721	1328987-1329859	1329846-1330898	1328685-1328990	1326759-1327319	312724-313776	-	313985-314668	314668-315744	315741-316619	316632-317597
DE824	64	2769940-2772258	2652128-2653657	135319-135835	136003-136689	136692-137456	137476-139299	139289-140317	140330-141439	141443-142567	146689-147894	147905-148462	148462-149349	149403-150665	150742-151887	-	-	2642422-2645055	799879-800441	234264-235381	1490465-1491925	296280-299309	299739-299981	306077-306469	299309-299767	299994-301154	1076104-1080543	295904-296197	306485-306799	2498368-2501167	333527-335602	2013719-2014542	2028032-2028166	2409960-2410889	2412405-2413382	2411456-2412403	2775090-2776049	2205361-2207781	2694624-2695862	2696128-2697000	2696987-2698039	2695826-2696131	2693900-2694460	1090424-1091476	2804936-2806873	1091685-1092368	1092368-1093444	1093441-1094319	1094332-1095297
DE825	64	210318-212636	328919-330448	1426500-1427016	1427184-1427870	1427873-1428637	1428657-1430480	1430470-1431498	1431511-1432620	1432624-1433748	1437870-1439075	1439086-1439643	1439643-1440530	1440584-1441846	1441923-1443068	-	-	337521-339860	2055072-2055634	1512026-1513143	1974152-1975612	1590050-1593079	1593509-1593751	1080573-1080965	1593079-1593537	1593764-1594924	195137-199576	1589674-1589967	1080981-1081295	2440697-2443771	1108023-1110098	1232708-1233531	1247321-1247455	1882570-1883499	1880077-1881054	1881056-1882003	2471044-2472003	68451-70871	286714-287952	285576-286448	284537-285589	286445-286750	288116-288676	391222-392274	1755005-1756942	392483-393166	393166-394242	394239-395117	395130-396095
DE826	63	1472426-1474744	1354614-1356143	29804-30320	30488-31174	31177-31941	31961-33784	33774-34802	34815-35924	35928-37052	41174-42379	42390-42947	42947-43834	43888-45150	45227-46372	1627900-1628349	2753347-2755930	1344908-1347541	691876-692438	127866-128983	2091060-2092520	189814-192843	193273-193515	199606-199998	192843-193301	193528-194688	865681-870120	189438-189731	200014-200328	1200989-1203788	227056-229131	1587129-1587952	731764-731898	1112570-1113499	1115015-1115992	1114066-1115013	2024765-2025724	908108-910528	1397110-1398348	1398614-1399486	1399473-1400525	1398312-1398617	1396386-1396946	2503704-2504756	2504959-2506896	2502812-2503495	2501736-2502812	2500861-2501739	2499883-2500848
DE827	63	1486374-1488692	1604978-1606507	967076-967592	967760-968446	968449-969213	969233-971056	971046-972074	972087-973196	973200-974324	978446-979651	979662-980219	980219-981106	981160-982422	982499-983644	-	800755-803174	1613580-1616213	1277617-1278179	730443-731560	2140249-2141709	792391-795420	795850-796092	870150-870542	795420-795878	796105-797265	171873-176312	792015-792308	870558-870872	2044125-2046924	897600-899675	1708360-1709183	1191699-1191833	1106763-1107692	1104270-1105247	1105249-1106196	995410-996369	168695-171115	1562773-1564011	1561635-1562507	1560596-1561648	1562504-1562809	1564175-1564735	1375360-1376412	2027863-2029800	1374468-1375151	1373392-1374468	1372517-1373395	1371539-1372504
DE828	65	2653217-2655535	2535403-2536932	5505-6021	6189-6875	6878-7642	7662-9485	9475-10503	10516-11625	11629-12753	16875-18080	18091-18648	18648-19535	19589-20851	20928-22073	-	707257-709676	2526009-2528330	670151-670713	104597-105714	1374565-1376025	166545-169574	170004-170246	176342-176734	169574-170032	170259-171419	194946-199385	166169-166462	176750-177064	2381669-2384468	203792-205867	1896192-1897015	1910506-1910640	2293371-2294300	2295816-2296793	2294867-2295814	1014206-1015165	2088120-2090540	2577899-2579137	2579403-2580277	2580264-2581316	2579101-2579406	2577175-2577735	962907-963959	2793751-2795688	964168-964851	964851-965927	965924-966802	966815-967780
DE829	65	2672204-2674522	2554392-2555921	29393-29909	30077-30763	30766-31530	31550-33373	33363-34391	34404-35513	35517-36641	40763-41968	41979-42536	42536-43423	43477-44739	44816-45961	-	725818-728237	2544944-2547319	688542-689104	127670-128787	1393627-1395087	189618-192647	193077-193319	199415-199807	192647-193105	193332-194492	182428-186867	189242-189535	199823-200137	2400672-2403471	226354-228429	1915528-1916351	1929842-1929976	2312192-2313121	2314637-2315614	2313688-2314635	1036108-1037067	2107197-2109617	2596888-2598126	2598392-2599264	2599251-2600303	2598090-2598395	2596164-2596724	981699-982751	2813277-2815214	982960-983643	983643-984719	984716-985594	985607-986572
ES536	65	2693962-2696280	2576104-2577633	16971-17487	17655-18341	18344-19108	19128-20951	20941-21969	21982-23091	23095-24219	28341-29546	29557-30114	30114-31001	31055-32317	32394-33539	-	716682-719101	2566398-2569031	679584-680146	115156-116273	1415198-1416658	177104-180133	180563-180805	186897-187289	180133-180591	180818-181978	194423-198862	176728-177021	187305-187619	2422364-2425163	213836-215911	1937471-1938294	1951777-1951911	2334068-2334997	2336513-2337490	2335564-2336511	1061944-1062903	2129116-2131536	2618646-2619884	2620150-2621022	2621009-2622061	2619848-2620153	2617922-2618482	1003605-1004657	1001211-1003148	1004866-1005549	1005549-1006625	1006622-1007500	1007513-1008478
FI535	65	2719632-2721950	2601820-2603349	28796-29312	29482-30168	30171-30935	30955-32778	32768-33796	33809-34918	34922-36046	40168-41373	41384-41941	41941-42828	42882-44144	44221-45366	-	773610-776193	2592114-2594747	736499-737061	126997-128114	1441085-1442545	189099-192128	192558-192800	198892-199284	192128-192586	192813-193973	171085-175524	188723-189016	199300-199614	2448063-2450862	226600-228534	1963331-1964154	1977645-1977779	2359755-2360684	2362200-2363177	2361251-2362198	996742-997701	2155232-2157652	2644316-2645554	2645820-2646692	2646679-2647731	2645518-2645823	2643592-2644152	1029437-1030489	2860231-2862168	1030698-1031381	1031381-1032457	1032454-1033332	1033345-1034310
Ge301	65	2675308-2677626	2557496-2559025	5495-6011	6179-6865	6868-7632	7652-9475	9465-10493	10506-11615	11619-12743	16865-18070	18081-18638	18638-19525	19579-20841	20918-22063	-	709100-711519	2547790-2550423	668288-668850	103746-104863	1372052-1373512	165777-168806	169236-169478	175554-175946	168806-169264	169491-170651	194288-198727	165401-165694	175962-176276	2403968-2406767	203004-205079	1918083-1918906	1932357-1932491	2315627-2316556	2318072-2319049	2317123-2318070	1016445-1017404	2110284-2112704	2599992-2601230	2601496-2602368	2602355-2603407	2601194-2601499	2599268-2599828	964062-965114	961684-963621	965323-966006	966006-967082	967079-967957	967970-968935
Ge302	65	2659663-2661981	2541851-2543380	28773-29289	29457-30143	30146-30910	30930-32753	32743-33771	33784-34893	34897-36021	40143-41348	41359-41916	41916-42803	42857-44119	44196-45341	-	728822-731241	2532145-2534778	691741-692303	126947-128064	1395442-1396902	188976-192005	192435-192677	198757-199149	192005-192463	192690-193850	194230-198669	188600-188893	199165-199479	2388319-2391118	226207-228282	1903192-1904015	1917474-1917608	2299787-2300716	2302232-2303209	2301283-2302230	1017469-1018428	2094848-2097268	2584347-2585585	2585851-2586723	2586710-2587762	2585549-2585854	2583623-2584183	983954-985006	981572-983509	985215-985898	985898-986974	986971-987849	987862-988827
Ge303	65	2696969-2699287	2579157-2580686	28761-29277	29445-30131	30134-30898	30918-32741	32731-33759	33772-34881	34885-36009	40131-41336	41347-41904	41904-42791	42845-44107	44184-45329	-	728581-731000	2569451-2572084	691516-692078	126978-128095	1396729-1398189	188926-191955	192385-192627	198699-199091	191955-192413	192640-193800	235955-240394	188550-188843	199107-199421	2425633-2428432	226149-228224	1940775-1941598	1955041-1955175	2337074-2338003	2339593-2340570	2338648-2339591	1057966-1058925	2132300-2134720	2621653-2622891	2623157-2624029	2624016-2625068	2622855-2623160	2620929-2621489	983652-984704	981278-983215	984913-985596	985596-986672	986669-987547	987560-988525
Ge304	65	2705330-2707648	2587518-2589047	70521-71037	71205-71891	71894-72658	72678-74501	74491-75519	75532-76641	76645-77769	81891-83096	83107-83664	83664-84551	84605-85867	85944-87089	-	770373-772792	2577812-2580445	733199-733761	168695-169812	1440338-1441798	230643-233672	234102-234344	240424-240816	233672-234130	234357-235517	194296-198735	230267-230560	240832-241146	2433986-2436785	267874-269949	1947379-1948202	1961661-1961795	2340225-2341154	2342670-2343647	2341721-2342668	1016344-1017303	2138952-2141372	2630014-2631252	2631518-2632390	2632377-2633429	2631216-2631521	2629290-2629850	1025475-1026527	1023093-1025030	1026736-1027419	1027419-1028495	1028492-1029370	1029383-1030348
Ge305	65	2661781-2664099	2543829-2545358	28761-29279	29447-30133	30136-30900	30920-32743	32733-33761	33774-34883	34887-36011	40133-41338	41349-41906	41906-42793	42847-44109	44186-45331	-	728577-730996	2534123-2536756	691453-692015	126929-128046	1395336-1396796	188992-192021	192451-192693	198765-199157	192021-192479	192706-193866	194430-198869	188616-188909	199173-199487	2390305-2393104	226215-228290	1905272-1906095	1919538-1919672	2301737-2302666	2304182-2305159	2303233-2304180	1016783-1017742	2096797-2099217	2586465-2587703	2587969-2588841	2588828-2589880	2587667-2587972	2585741-2586301	983758-984810	981384-983321	985019-985702	985702-986778	986775-987653	987666-988631
Ge306	65	2663385-2665703	2545573-2547102	28779-29295	29463-30149	30152-30916	30936-32759	32749-33777	33790-34899	34903-36027	40149-41354	41365-41922	41922-42809	42863-44125	44202-45347	-	728954-731373	2535867-2538500	691786-692348	127166-128283	1396043-1397503	189114-192143	192573-192815	198899-199291	192143-192601	192828-193988	195742-200181	188738-189031	199307-199621	2392043-2394842	226349-228424	1925828-1926651	1940118-1940252	2298318-2299247	2300763-2301740	2299814-2300761	1018273-1019232	2096809-2099229	2588069-2589307	2589573-2590445	2590432-2591484	2589271-2589576	2587345-2587905	984241-985293	981855-983792	985502-986185	986185-987261	987258-988136	988149-989114
Ge307	65	2670536-2672854	2552615-2554144	28860-29376	29544-30230	30233-30997	31017-32840	32830-33858	33871-34980	34984-36108	40230-41435	41446-42003	42003-42890	42944-44206	44283-45428	-	730381-732800	2542909-2545542	693268-693830	127249-128366	1397889-1399349	189087-192116	192546-192788	200211-200603	192116-192574	192801-193961	407672-412111	188711-189004	200619-200933	2398978-2401777	227661-229736	1913977-1914800	1928292-1928426	2310539-2311468	2312984-2313961	2312035-2312982	1820333-1821292	2105738-2108158	2595220-2596458	2596724-2597596	2597583-2598635	2596422-2596727	2594496-2595056	985583-986635	983185-985122	986844-987527	987527-988603	988600-989478	989491-990456
Ge308	63	124665-126983	2748268-2749797	242214-242730	242898-243584	243587-244351	244371-246194	246184-247212	247225-248334	248338-249462	253584-254789	254800-255357	255357-256244	256298-257560	257637-258782	-	2106228-2108647	2738562-2741195	905036-905598	340400-341517	1440243-1441703	402348-405377	405807-406049	412141-412533	405377-405835	406062-407222	194320-198759	401972-402265	412549-412863	2594724-2597523	439591-441666	939966-940789	2124305-2124439	2506378-2507307	2508823-2509800	2507874-2508821	1016389-1017348	2301644-2304064	49349-50587	50853-51725	51712-52764	50551-50856	48625-49185	1852743-1853795	1854252-1856189	1851851-1852534	1850775-1851851	1849900-1850778	1848922-1849887
Ge309	65	2666516-2668834	2548641-2550170	28791-29307	29475-30161	30164-30928	30948-32771	32761-33789	33802-34911	34915-36039	40161-41366	41377-41934	41934-42821	42875-44137	44214-45359	-	728781-731200	2538935-2541568	691683-692245	126977-128094	1396293-1397753	188996-192025	192455-192697	198789-199181	192025-192483	192710-193870	195409-199848	188620-188913	199197-199511	2395097-2397896	226239-228314	1909855-1910678	1924161-1924295	2306696-2307625	2309141-2310118	2308192-2309139	1017330-1018289	2101903-2104323	2591200-2592438	2592704-2593576	2593563-2594615	2592402-2592707	2590476-2591036	983886-984938	981492-983429	985147-985830	985830-986906	986903-987781	987794-988759
Ge310	65	2699491-2701809	2581679-2583208	37099-37615	37783-38469	38472-39236	39256-41079	41069-42097	42110-43219	43223-44347	48469-49674	49685-50242	50242-51129	51183-52445	52522-53667	-	729891-732310	2571973-2574606	692693-693255	128145-129262	1396635-1398095	190093-193122	193552-193794	199878-200270	193122-193580	193807-194967	236500-240939	189717-190010	200286-200600	2428143-2430942	227328-229403	1943038-1943861	1957328-1957462	2339626-2340555	2342071-2343048	2341122-2342069	1058499-1059458	2134767-2137187	2624175-2625413	2625679-2626551	2626538-2627590	2625377-2625682	2623451-2624011	984835-985887	982449-984386	986096-986779	986779-987855	987852-988730	988743-989708
Ge311	65	2697331-2699649	2579522-2581051	70580-71096	71264-71950	71953-72717	72737-74560	74550-75578	75591-76700	76704-77828	81950-83155	83166-83723	83723-84610	84664-85926	86003-87148	-	770813-773232	2569816-2572449	733744-734306	169240-170357	1432590-1434050	231188-234217	234647-234889	240969-241361	234217-234675	234902-236062	194249-198688	230812-231105	241377-241691	2425772-2428571	268419-270494	1940377-1941200	1954659-1954793	2336869-2337798	2339314-2340291	2338365-2339312	2484262-2485221	2132150-2134570	2622017-2623253	2623519-2624391	2624378-2625430	2623217-2623522	2621293-2621853	1025979-1027031	1023597-1025534	1027240-1027923	1027923-1028999	1028996-1029874	1029887-1030852
Ge312	65	1474619-1476937	1356729-1358258	28791-29307	29475-30161	30164-30928	30948-32771	32761-33789	33802-34911	34915-36039	40161-41366	41377-41934	41934-42821	42875-44137	44214-45359	-	2770626-2773045	1347023-1349656	691610-692172	126977-128094	2104019-2105479	188925-191954	192384-192626	198718-199110	191954-192412	192639-193799	379271-383710	188549-188842	199126-199440	1203185-1205984	226168-228243	1589330-1590153	731233-731367	1114532-1115461	1116977-1117954	1116028-1116975	1201682-1202641	909698-912118	1399303-1400541	1400807-1401679	1401666-1402718	1400505-1400810	1398579-1399139	2516672-2517724	2518181-2520118	2515780-2516463	2514704-2515780	2513829-2514707	2512851-2513816
Ge313	65	95953-98271	2764232-2765761	213729-214245	214413-215099	215102-215866	215886-217709	217699-218727	218740-219849	219853-220977	225099-226304	226315-226872	226872-227759	227813-229075	229152-230297	-	913858-916277	2754526-2757159	876686-877248	312007-313124	1581202-1582662	373955-376984	377414-377656	383740-384132	376984-377442	377669-378829	194363-198802	373579-373872	384148-384462	2610696-2613495	411190-413265	2125637-2126460	2139927-2140061	2522180-2523109	2524625-2525602	2523676-2524623	1016671-1017630	2317455-2319875	20637-21875	22141-23013	23000-24052	21839-22144	19913-20473	1169074-1170126	1166688-1168625	1170335-1171018	1171018-1172094	1172091-1172969	1172982-1173947
Ge314	65	2664180-2666498	2546368-2547897	28791-29307	29475-30161	30164-30928	30948-32771	32761-33789	33802-34911	34915-36039	40161-41366	41377-41934	41934-42821	42875-44137	44214-45359	-	728927-731346	2536662-2539295	691725-692287	127091-128208	1400083-1401543	189039-192068	192498-192740	198832-199224	192068-192526	192753-193913	194257-198696	188663-188956	199240-199554	2392824-2395623	226282-228357	1905951-1906774	1920257-1920391	2299120-2300049	2301565-2302542	2300616-2301563	1017107-1018066	2097699-2100119	2588864-2590102	2590368-2591240	2591227-2592279	2590066-2590371	2588140-2588700	984168-985220	981774-983711	985429-986112	986112-987188	987185-988063	988076-989041
Ge315	65	2662969-2665287	2545102-2546631	28791-29307	29475-30161	30164-30928	30948-32771	32761-33789	33802-34911	34915-36039	40161-41366	41377-41934	41934-42821	42875-44137	44214-45359	-	729333-731752	2535396-2538029	692228-692790	127111-128228	1400639-1402099	188933-191962	192392-192634	198726-199118	191962-192420	192647-193807	194207-198646	188557-188850	199134-199448	2391558-2394357	226176-228251	1926675-1927498	1940981-1941115	2302960-2303889	2305405-2306382	2304456-2305403	1016314-1017273	2097911-2100331	2587598-2588836	2589102-2589974	2589961-2591013	2588800-2589105	2586874-2587434	984548-985600	982154-984091	985809-986492	986492-987568	987565-988443	988456-989421
Ge316	65	2701356-2703674	2583544-2585073	28773-29289	29457-30143	30146-30910	30930-32753	32743-33771	33784-34893	34897-36021	40143-41348	41359-41916	41916-42803	42857-44119	44196-45341	-	728877-731296	2573838-2576471	691809-692371	126947-128064	1395315-1396775	188895-191924	192354-192596	198676-199068	191924-192382	192609-193769	195388-199827	188519-188812	199084-199398	2429944-2432743	226244-228319	1943212-1944035	1957494-1957628	2336189-2337118	2338634-2339611	2337685-2338632	1017237-1018196	2134785-2137205	2626040-2627278	2627544-2628416	2628403-2629455	2627242-2627547	2625316-2625876	983669-984721	981287-983224	984930-985613	985613-986689	986686-987564	987577-988542
Ge318	65	2696550-2698868	2578738-2580267	43750-44266	42896-43582	42129-42893	40286-42109	39268-40296	38146-39255	37018-38142	31691-32896	31123-31680	30236-31123	28920-30182	27698-28843	-	729913-732332	2569032-2571665	692848-693410	128136-129253	1400627-1402087	190084-193113	193543-193785	199857-200249	193113-193571	193798-194958	387139-391578	189708-190001	200265-200579	2425214-2428013	227307-229382	1940368-1941191	1954634-1954768	2336677-2337606	2339122-2340099	2338173-2339120	1159232-1160191	2131893-2134313	2621234-2622472	2622738-2623610	2623597-2624649	2622436-2622741	2620510-2621070	984666-985718	982292-984229	985927-986610	986610-987686	987683-988561	988574-989539
Ge319	65	103912-106230	2736812-2738341	221670-222186	222354-223040	223043-223807	223827-225650	225640-226668	226681-227790	227794-228918	233040-234245	234256-234813	234813-235700	235754-237016	237093-238238	-	871901-874320	2727106-2729739	834804-835366	319871-320988	1538213-1539673	381819-384848	385278-385520	391608-392000	384848-385306	385533-386693	122898-127337	381443-381736	392016-392330	2583272-2586071	419058-421133	2096368-2097191	2110668-2110802	2489587-2490516	2492032-2493009	2491083-2492030	1550409-1551368	2288306-2290726	28596-29834	30100-30972	30959-32011	29798-30103	27872-28432	1126733-1127785	1124343-1126280	1127994-1128677	1128677-1129753	1129750-1130628	1130641-1131606
Ge320	53	2597954-2600272	2480142-2481671	-	-	-	-	-	-	-	-	-	-	-	-	-	1836316-1838735	2470436-2473069	620058-620620	55646-56763	1170577-1172037	117594-120623	121053-121295	127367-127759	120623-121081	121308-122468	276556-280995	117218-117511	127775-128089	2326618-2329417	154817-156892	654956-655779	1854353-1854487	2232982-2233911	2235427-2236404	2234478-2235425	1098985-1099944	2031612-2034032	2522638-2523876	2524142-2525014	2525001-2526053	2523840-2524145	2521914-2522474	1582799-1583851	1584288-1586225	1581907-1582590	1580831-1581907	1579956-1580834	1578978-1579943
Ge321	65	2746750-2749068	2628938-2630467	110678-111194	111362-112048	112051-112815	112835-114658	114648-115676	115689-116798	116802-117926	122048-123253	123264-123821	123821-124708	124762-126024	126101-127246	-	811124-813543	2619232-2621865	774026-774588	209174-210291	1482148-1483608	271232-274261	274691-274933	281025-281417	274261-274719	274946-276106	195668-200107	270856-271149	281433-281747	2475394-2478193	308475-310550	1987302-1988125	2001608-2001742	2381588-2382517	2384033-2385010	2383084-2384031	1015038-1015997	2180108-2182528	2671434-2672672	2672938-2673810	2673797-2674849	2672636-2672941	2670710-2671270	1066216-1067268	1063822-1065759	1067477-1068160	1068160-1069236	1069233-1070111	1070124-1071089
Ge322	62	2677146-2679464	2559282-2560811	32266-32782	32950-33636	33639-34403	34423-36246	36236-37264	37277-38386	38390-39514	43636-44841	44852-45409	45409-46296	46350-47612	47689-48834	-	729895-732314	2549888-2552209	692781-693343	128408-129525	1398375-1399835	190356-193385	193815-194057	200137-200529	193385-193843	194070-195230	236717-241156	189980-190273	200545-200859	2400141-2402940	227587-229662	1849833-1850015	1927454-1927588	2306373-2307302	2308818-2309795	2307869-2308816	1058925-1059884	2104942-2107362	2601830-2603068	2603334-2604206	2604193-2605245	2603032-2603337	2601106-2601666	982547-983599	-	983808-984491	984491-985567	985564-986442	986455-987420
Ge323	63	2688765-2691083	2570953-2572482	71166-71682	71850-72536	72539-73303	73323-75146	75136-76164	76177-77286	77290-78414	82536-83741	83752-84309	84309-85196	85250-86512	86589-87734	-	771482-773901	2561247-2563880	734256-734818	169453-170570	1438107-1439567	231401-234430	234860-235102	241186-241578	234430-234888	235115-236275	194387-198826	231025-231318	241594-241908	2417417-2420216	268711-270786	1932431-1933254	1946721-1946855	2329045-2329974	2331490-2332467	2330541-2331488	1018096-1019055	2124152-2126572	2613449-2614687	2614953-2615825	2615812-2616864	2614651-2614956	2612725-2613285	1026430-1027482	1024044-1025981	1027691-1028374	1028374-1029450	1029447-1030325	1030338-1031303
Ge324	65	2665086-2667404	2547018-2548547	28791-29307	29475-30161	30164-30928	30948-32771	32761-33789	33802-34911	34915-36039	40161-41366	41377-41934	41934-42821	42875-44137	44214-45359	-	729404-731951	2537312-2539945	692130-692692	127015-128132	1397418-1398878	189063-192092	192522-192764	198856-199248	192092-192550	192777-193937	299465-303904	188687-188980	199264-199578	2393474-2396273	226306-228381	1908500-1909323	1922895-1923029	2305066-2305995	2307511-2308488	2306562-2307509	1118822-1119781	2100234-2102654	2589678-2590916	2591182-2592054	2592041-2593093	2590880-2591185	2588954-2589514	985304-986356	982910-984847	986565-987248	987248-988324	988321-989199	989212-990177
Ge325	65	2770053-2772371	2652241-2653770	134119-134635	134803-135489	135492-136256	136276-138099	138089-139117	139130-140239	140243-141367	145489-146694	146705-147262	147262-148149	148203-149465	149542-150687	-	831645-834064	2642535-2645168	795708-796270	232249-233366	1497619-1499079	294197-297226	297656-297898	303934-304326	297226-297684	297911-299071	237189-241628	293821-294114	304342-304656	2498753-2501552	331384-333459	2013724-2014547	2029133-2029267	2410336-2411265	2412781-2413758	2411832-2412779	1059523-1060482	2205934-2208354	2694737-2695975	2696241-2697113	2697100-2698152	2695939-2696244	2694013-2694573	1086375-1087427	1084037-1085974	1087636-1088319	1088319-1089395	1089392-1090270	1090283-1091248
Ge326	65	2705453-2707771	2587641-2589170	78855-79371	79539-80225	80228-80992	81012-82835	82825-83853	83866-84975	84979-86103	90225-91430	91441-91998	91998-92885	92939-94201	94278-95423	-	772022-774441	2577935-2580568	734914-735476	169913-171030	1438634-1440094	231861-234890	235320-235562	241658-242050	234890-235348	235575-236735	299822-304261	231485-231778	242066-242380	2434050-2436849	269107-271182	1948760-1949583	1963074-1963208	2345424-2346353	2347869-2348846	2346920-2347867	1120135-1121094	2140502-2142922	2630137-2631375	2631641-2632513	2632500-2633552	2631339-2631644	2629413-2629973	1027016-1028068	1024618-1026555	1028277-1028960	1028960-1030036	1030033-1030911	1030924-1031889
Ge327	65	2774530-2776848	2656718-2658247	134485-135001	135169-135855	135858-136622	136642-138465	138455-139483	139496-140605	140609-141733	145855-147060	147071-147628	147628-148515	148569-149831	149908-151053	-	833008-835427	2647012-2649645	796023-796585	232610-233727	1499338-1500798	294558-297587	298017-298259	304291-304683	297587-298045	298272-299432	194502-198941	294182-294475	304699-305013	2503234-2506033	331741-333816	2019290-2020113	2033476-2033610	2414849-2415778	2417294-2418271	2416345-2417292	1017262-1018221	2210226-2212646	2699214-2700452	2700718-2701590	2701577-2702629	2700416-2700721	2698490-2699050	1087692-1088744	1085358-1087295	1088953-1089636	1089636-1090712	1090709-1091587	1091600-1092565
Ge328	65	2668598-2670916	2550677-2552206	28797-29313	29481-30167	30170-30934	30954-32777	32767-33795	33808-34917	34921-36045	40167-41372	41383-41940	41940-42827	42881-44143	44220-45365	-	729016-731435	2540971-2543604	691908-692470	127226-128343	1396457-1397917	189174-192203	192633-192875	198971-199363	192203-192661	192888-194048	300718-305157	188798-189091	199379-199693	2397129-2399928	226421-228496	1912731-1913554	1927045-1927179	2308722-2309651	2311167-2312144	2310218-2311165	1123946-1124905	2104122-2106542	2593282-2594520	2594786-2595658	2595645-2596697	2594484-2594789	2592558-2593118	984541-985593	982143-984080	985802-986485	986485-987561	987558-988436	988449-989414
Ge329	65	2798277-2800595	2680345-2681874	135136-135652	135820-136506	136509-137273	137293-139116	139106-140134	140147-141256	141260-142384	146506-147711	147722-148279	148279-149166	149220-150482	150559-151704	-	835360-837779	2670639-2673272	798255-798817	233446-234563	1503481-1504941	295394-298423	298853-299095	305187-305579	298423-298881	299108-300268	300571-305010	295018-295311	305595-305909	2526672-2529471	332637-334712	2039647-2040470	2053953-2054087	2432949-2433878	2435394-2436371	2434445-2435392	1122929-1123888	2231291-2233711	2722961-2724199	2724465-2725337	2725324-2726376	2724163-2724468	2722237-2722797	1091244-1092296	1088605-1090542	1092505-1093188	1093188-1094264	1094261-1095139	1095152-1096117
Ge330	65	2793679-2795997	2675867-2677396	135031-135547	135715-136401	136404-137168	137188-139011	139001-140029	140042-141151	141155-142279	146401-147606	147617-148174	148174-149061	149115-150377	150454-151599	-	835055-837474	2666161-2668794	797947-798509	233295-234412	1502597-1504057	295243-298272	298702-298944	305040-305432	298272-298730	298957-300117	277309-281748	294867-295160	305448-305762	2522194-2524993	332490-334565	2037186-2038009	2051500-2051634	2433591-2434520	2436036-2437013	2435087-2436034	1099673-1100632	2228854-2231274	2718363-2719601	2719867-2720739	2720726-2721778	2719565-2719870	2717639-2718199	1090422-1091474	1087779-1089716	1091683-1092366	1092366-1093442	1093439-1094317	1094330-1095295
Ge331	65	2753313-2755631	2635397-2636926	111736-112252	112420-113106	113109-113873	113893-115716	115706-116734	116747-117856	117860-118984	123106-124311	124322-124879	124879-125766	125820-127082	127159-128304	-	811818-814237	2625691-2628324	774710-775272	210033-211150	1478894-1480354	271981-275010	275440-275682	281778-282170	275010-275468	275695-276855	195388-199827	271605-271898	282186-282500	2481849-2484648	309228-311303	1997769-1998592	2012083-2012217	2393501-2394430	2395946-2396923	2394997-2395944	1017226-1018185	2189160-2191580	2677997-2679235	2679501-2680373	2680360-2681412	2679199-2679504	2677273-2677833	1067165-1068217	1064767-1066704	1068426-1069109	1069109-1070185	1070182-1071060	1071073-1072038
Ge332	65	2669457-2671775	2551645-2553174	43750-44266	42896-43582	42129-42893	40286-42109	39268-40296	38146-39255	37018-38142	31691-32896	31123-31680	30236-31123	28920-30182	27698-28843	-	729752-732171	2541939-2544572	692687-693249	128136-129253	1396467-1397927	190084-193113	193543-193785	199857-200249	193113-193571	193798-194958	194276-198715	189708-190001	200265-200579	2398121-2400920	227307-229382	1914083-1914906	1928349-1928483	2309798-2310727	2312243-2313220	2311294-2312241	1018971-1019930	2105330-2107750	2594141-2595379	2595645-2596517	2596504-2597556	2595343-2595648	2593417-2593977	984742-985794	982368-984305	986003-986686	986686-987762	987759-988637	988650-989615
Ge333	65	2662778-2665096	2544966-2546495	28803-29319	29487-30173	30176-30940	30960-32783	32773-33801	33814-34923	34927-36051	40173-41378	41389-41946	41946-42833	42887-44149	44226-45371	-	731362-733781	2535260-2537893	694242-694804	126996-128113	1398352-1399812	188944-191973	192403-192645	198745-199137	191973-192431	192658-193818	194544-198983	188568-188861	199153-199467	2391414-2394213	226195-228270	1906732-1907555	1921054-1921188	2302786-2303715	2305231-2306208	2304282-2305229	1041726-1042685	2098045-2100465	2587462-2588700	2588966-2589838	2589825-2590877	2588664-2588969	2586738-2587298	986404-987456	984002-985939	987665-988348	988348-989424	989421-990299	990312-991277
Ge334	65	2665624-2667942	2547695-2549224	28809-29325	29493-30179	30182-30946	30966-32789	32779-33807	33820-34929	34933-36057	40179-41384	41395-41952	41952-42839	42893-44155	44232-45377	-	753676-756095	2537989-2540622	716311-716873	127197-128314	1421178-1422638	189208-192237	192667-192909	199013-199405	192237-192695	192922-194082	313490-317929	188832-189125	199421-199735	2394012-2396811	226463-228538	1907752-1908575	1921881-1922015	2305381-2306310	2307890-2308867	2306941-2307888	1136366-1137325	2100158-2102578	2590191-2591429	2591695-2592567	2592554-2593606	2591393-2591698	2589467-2590027	1009028-1010080	1006622-1008559	1010289-1010972	1010972-1012048	1012045-1012923	1012936-1013901
Ge335	65	30087-32405	2666124-2667653	147774-148290	148458-149144	149147-149911	149931-151754	151744-152772	152785-153894	153898-155022	159144-160349	160360-160917	160917-161804	161858-163120	163197-164342	-	848746-851383	2656838-2659051	811572-812134	246210-247327	1516250-1517710	308158-311187	311617-311859	317959-318351	311187-311645	311872-313032	224528-228967	307782-308075	318367-318681	2512766-2515565	345409-347484	2027383-2028206	2041444-2041578	2423847-2424776	2426292-2427269	2425343-2426290	1046813-1047772	2219011-2221431	2708749-2709987	2710253-2711125	2711112-2712164	2709951-2710256	2708025-2708585	1103856-1104908	1101454-1103391	1105117-1105800	1105800-1106876	1106873-1107751	1107764-1108729
Ge336	64	2730169-2732487	2612357-2613886	58777-59293	59461-60147	60150-60914	60934-62757	62747-63775	63788-64897	64901-66025	70147-71352	71363-71920	71920-72807	72861-74123	74200-75345	-	760419-762838	2602651-2605284	723175-723737	157151-158268	1426300-1427760	219200-222229	222659-222901	228997-229389	222229-222687	222914-224074	235981-240420	218824-219117	229405-229719	2424017-2426816	256701-258776	1904272-1904454	1953141-1953275	2335567-2336496	2338128-2339105	2337254-2338126	1656198-1657157	2130749-2133169	2654853-2656091	2656357-2657229	2657216-2658268	2656055-2656360	2654129-2654689	1014022-1015074	-	1015283-1015966	1015966-1017042	1017039-1017917	1017930-1018895
Ge337	64	2708117-2710435	2590305-2591834	70531-71047	71215-71901	71904-72668	72688-74511	74501-75529	75542-76651	76655-77779	81901-83106	83117-83674	83674-84561	84615-85877	85954-87099	-	1940175-1942594	2580599-2583232	733615-734177	168713-169830	1276301-1277761	230661-233690	234120-234362	240450-240842	233690-234148	234375-235535	194823-199262	230285-230578	240858-241172	2430863-2433662	267986-270061	804083-804265	1958244-1958378	2337089-2338018	2339534-2340511	2338585-2339532	1016860-1017819	2135687-2138107	2632801-2634039	2634305-2635177	2635164-2636216	2634003-2634308	2632077-2632637	1688604-1689656	-	1687712-1688395	1686636-1687712	1685761-1686639	1684783-1685748
Ge338	65	2668670-2670988	2550858-2552387	29381-29897	30065-30751	30754-31518	31538-33361	33351-34379	34392-35501	35505-36629	40751-41956	41967-42524	42524-43411	43465-44727	44804-45949	-	729228-731647	2541152-2543785	692139-692701	127559-128676	1396120-1397580	189507-192536	192966-193208	199292-199684	192536-192994	193221-194381	300670-305109	189131-189424	199700-200014	2397322-2400121	226742-228817	1913021-1913844	1927311-1927445	2308959-2309888	2311404-2312381	2310455-2311402	1123239-1124198	2104618-2107038	2593354-2594592	2594858-2595730	2595717-2596769	2594556-2594861	2592630-2593190	984365-985417	981979-983916	985626-986309	986309-987385	987382-988260	988273-989238
Ge339	65	2775830-2778148	2658018-2659547	135019-135535	135703-136389	136392-137156	137176-138999	138989-140017	140030-141139	141143-142267	146389-147594	147605-148162	148162-149049	149103-150365	150442-151587	-	835580-837999	2648312-2650945	798370-798932	233288-234405	1502217-1503677	295346-298375	298805-299047	305139-305531	298375-298833	299060-300220	194772-199211	294970-295263	305547-305861	2504474-2507273	332589-334664	2018770-2019593	2033171-2033305	2415920-2416849	2418365-2419342	2417416-2418363	978727-979686	2210704-2213124	2700514-2701752	2702018-2702890	2702877-2703929	2701716-2702021	2699790-2700350	1090736-1091788	1088342-1090279	1091997-1092680	1092680-1093756	1093753-1094631	1094644-1095609
Ge340	65	2665465-2667783	2547653-2549182	28797-29313	29481-30167	30170-30934	30954-32777	32767-33795	33808-34917	34921-36045	40167-41372	41383-41940	41940-42827	42881-44143	44220-45365	-	690549-692968	2537947-2540580	653436-653998	127112-128229	1357418-1358878	189162-192191	192621-192863	199241-199633	192191-192649	192876-194036	194316-198755	188786-189079	199649-199963	2393912-2396711	226690-228765	1906071-1906894	1920385-1920519	2304992-2305921	2307437-2308414	2306488-2307435	1017830-1018789	2100081-2102501	2590149-2591387	2591653-2592525	2592512-2593564	2591351-2591656	2589425-2589985	945995-947047	943596-945533	947256-947939	947939-949015	949012-949890	949903-950868
Ge341	65	2694897-2697215	2576845-2578374	28795-29311	29479-30165	30168-30932	30952-32775	32765-33793	33806-34915	34919-36043	40165-41370	41381-41938	41938-42825	42879-44141	44218-45363	-	729619-732346	2567139-2569772	692403-692965	127040-128157	1397570-1399030	188988-192017	192447-192689	198785-199177	192017-192475	192702-193862	194263-198702	188612-188905	199193-199507	2422980-2425779	226342-228417	1937590-1938413	1951904-1952038	2334210-2335139	2336655-2337632	2335706-2336653	1017115-1018074	2129353-2131773	2619581-2620819	2621085-2621957	2621944-2622996	2620783-2621088	2618857-2619417	985323-986375	982925-984862	986584-987267	987267-988343	988340-989218	989231-990196
Ge342	65	2698229-2700547	2580417-2581946	28797-29313	29481-30167	30170-30934	30954-32777	32767-33795	33808-34917	34921-36045	40167-41372	41383-41940	41940-42827	42881-44143	44220-45365	-	729208-731627	2570711-2573344	692033-692595	126987-128104	1401000-1402460	188935-191964	192394-192636	198732-199124	191964-192422	192649-193809	194225-198664	188559-188852	199140-199454	2426869-2429668	226182-228257	1941867-1942690	1956181-1956315	2338273-2339202	2340718-2341695	2339769-2340716	2487698-2488657	2133536-2135956	2622913-2624151	2624417-2625289	2625276-2626328	2624115-2624420	2622189-2622749	984608-985660	982210-984147	985869-986552	986552-987628	987625-988503	988516-989481
Ge343	65	1472101-1474419	1354289-1355818	28755-29271	29439-30125	30128-30892	30912-32735	32725-33753	33766-34875	34879-36003	40125-41330	41341-41898	41898-42785	42839-44101	44178-45323	-	2773706-2776125	1344583-1347216	691332-691894	126977-128094	2108273-2109733	188925-191954	192384-192626	198694-199086	191954-192412	192639-193799	194553-198992	188549-188842	199102-199416	1200769-1203568	226144-228219	1586634-1587457	730920-731054	1112498-1113427	1114943-1115920	1113994-1114941	987642-988601	908114-910534	1396785-1398023	1398289-1399161	1399148-1400200	1397987-1398292	1396061-1396621	2520084-2521136	2521569-2523506	2519192-2519875	2518116-2519192	2517241-2518119	2516263-2517228
Ge344	65	2678133-2680451	2560321-2561850	28754-29270	29438-30124	30127-30891	30911-32734	32724-33752	33765-34874	34878-36002	40124-41329	41340-41897	41897-42784	42838-44100	44177-45322	-	700032-702451	2550615-2553248	662975-663537	126995-128112	1371074-1372534	189253-192282	192712-192954	199022-199414	192282-192740	192967-194127	2666024-2670463	188877-189170	199430-199744	2406184-2408983	226472-228547	1921710-1922533	1935968-1936102	2317753-2318682	2320198-2321175	2319249-2320196	753285-754244	2113287-2115707	2602817-2604055	2604321-2605193	2605180-2606232	2604019-2604324	2602093-2602653	955162-956214	952792-954729	956423-957106	957106-958182	958179-959057	959070-960035
Ge345	63	2382578-2384896	2264554-2266083	2500147-2500663	2500831-2501517	2501520-2502284	2502304-2504127	2504117-2505145	2505158-2506267	2506271-2507395	2511517-2512722	2512733-2513290	2513290-2514177	2514231-2515493	2515570-2516715	-	463939-466358	2254848-2257481	426831-427393	2598748-2599865	1132794-1134254	2660696-2663725	2664155-2664397	2670493-2670885	2663725-2664183	2664410-2665570	194363-198802	2660320-2660613	2670901-2671215	2110927-2113726	2697522-2699597	1625583-1626406	1640007-1640141	2022381-2023310	2024826-2025803	2023877-2024824	1017674-1018633	1817626-1820046	2307170-2308408	2308674-2309546	2309533-2310585	2308372-2308677	2306446-2307006	720912-721964	718514-720451	722173-722856	722856-723932	723929-724807	724820-725785
Ge346	65	2667998-2670316	2550186-2551715	28791-29307	29475-30161	30164-30928	30948-32771	32761-33789	33802-34911	34915-36039	40161-41366	41377-41934	41934-42821	42875-44137	44214-45359	-	728999-731418	2540480-2543113	691894-692456	127091-128208	1397055-1398515	189039-192068	192498-192740	198832-199224	192068-192526	192753-193913	194445-198884	188663-188956	199240-199554	2396642-2399441	226381-228456	1912712-1913535	1926762-1926896	2308321-2309250	2310766-2311743	2309817-2310764	1016922-1017881	2103823-2106243	2592682-2593920	2594186-2595058	2595045-2596097	2593884-2594189	2591958-2592518	985017-986069	982622-984559	986278-986961	986961-988037	988034-988912	988925-989890
Ge347	63	2648913-2651231	2531081-2532610	28791-29307	29475-30161	30164-30928	30948-32771	32761-33789	33802-34911	34915-36039	40161-41366	41377-41934	41934-42821	42875-44137	44214-45359	-	729078-731497	2521375-2524008	691973-692535	126977-128094	1396169-1397629	189125-192154	192584-192826	198914-199306	192154-192612	192839-193999	194641-199080	188749-189042	199322-199636	2377536-2380335	226364-228439	1890223-1891046	1904615-1904749	2283840-2284769	2286285-2287262	2285336-2286283	1017997-1018956	2082013-2084433	2573597-2574835	2575101-2575973	2575960-2577012	2574799-2575104	2572873-2573433	984154-985206	981760-983697	985415-986098	986098-987174	987171-988049	988062-989027
Ge348	65	2663213-2665531	2545309-2546838	28785-29301	29469-30155	30158-30922	30942-32765	32755-33783	33796-34905	34909-36033	40155-41360	41371-41928	41928-42815	42869-44131	44208-45353	-	729429-732102	2535603-2538236	692251-692813	127372-128489	1397832-1399292	189320-192349	192779-193021	199110-199502	192349-192807	193034-194194	300478-304917	188944-189237	199518-199832	2391769-2394568	226611-228686	1906423-1907246	1920942-1921076	2303206-2304135	2305651-2306628	2304702-2305649	1122773-1123732	2098477-2100897	2587897-2589135	2589401-2590273	2590260-2591312	2589099-2589404	2587173-2587733	985457-986509	983067-985004	986718-987401	987401-988477	988474-989352	989365-990330
Ge349	65	2781819-2784137	2664007-2665536	134832-135348	135516-136202	136205-136969	136989-138812	138802-139830	139843-140952	140956-142080	146202-147407	147418-147975	147975-148862	148916-150178	150255-151400	-	834951-837370	2654301-2656934	797846-798408	233130-234247	1501914-1503374	295154-298183	298613-298855	304947-305339	298183-298641	298868-300028	194440-198879	294778-295071	305355-305669	2510287-2513086	332399-334474	2026157-2026980	2040463-2040597	2421973-2422902	2424418-2425395	2423469-2424416	1017160-1018119	2217523-2219943	2706503-2707741	2708007-2708879	2708866-2709918	2707705-2708010	2705779-2706339	1090158-1091210	1087764-1089701	1091419-1092102	1092102-1093178	1093175-1094053	1094066-1095031
Ge350	65	2667767-2670085	2549955-2551484	28791-29307	29475-30161	30164-30928	30948-32771	32761-33789	33802-34911	34915-36039	40161-41366	41377-41934	41934-42821	42875-44137	44214-45359	-	729577-731996	2540249-2542882	692479-693041	127166-128283	1396514-1397974	189116-192145	192575-192817	198909-199301	192145-192603	192830-193990	301606-306045	188740-189033	199317-199631	2396411-2399210	226467-228542	1912180-1913003	1926486-1926620	2307989-2308918	2310434-2311411	2309485-2310432	1123649-1124608	2103547-2105967	2592451-2593689	2593955-2594827	2594814-2595866	2593653-2593958	2591727-2592287	984657-985709	982263-984200	985918-986601	986601-987677	987674-988552	988565-989530
Ge351	65	2798866-2801184	2681054-2682583	136180-136696	136864-137550	137553-138317	138337-140160	140150-141178	141191-142300	142304-143428	147550-148755	148766-149323	149323-150210	150264-151526	151603-152748	-	836211-838630	2671348-2673981	799140-799702	234350-235467	1502898-1504358	296298-299327	299757-299999	306075-306467	299327-299785	300012-301172	300846-305285	295922-296215	306483-306797	2527526-2530325	333525-335600	2043531-2044354	2057805-2057939	2439143-2440072	2441588-2442565	2440639-2441586	1124333-1125292	2234802-2237222	2723550-2724788	2725054-2725926	2725913-2726965	2724752-2725057	2722826-2723386	1091081-1092133	1088703-1090640	1092342-1093025	1093025-1094101	1094098-1094976	1094989-1095954
Ge352	65	2770653-2772971	2652736-2654265	135219-135735	135903-136589	136592-137356	137376-139199	139189-140217	140230-141339	141343-142467	146589-147794	147805-148362	148362-149249	149303-150565	150642-151787	-	836036-838455	2643030-2645663	798712-799274	233578-234695	1504184-1505644	295526-298555	298985-299227	305315-305707	298555-299013	299240-300400	297001-301440	295150-295443	305723-306037	2499196-2501995	332872-334947	2014248-2015071	2028546-2028680	2410833-2411762	2413278-2414255	2412329-2413276	1117289-1118248	2205868-2208288	2695337-2696575	2696841-2697713	2697700-2698752	2696539-2696844	2694613-2695173	1091560-1092612	1089170-1091107	1092821-1093504	1093504-1094580	1094577-1095455	1095468-1096433
Ge353	65	2767617-2769935	2649805-2651334	131671-132187	132355-133041	133044-133808	133828-135651	135641-136669	136682-137791	137795-138919	143041-144246	144257-144814	144814-145701	145755-147017	147094-148239	-	830189-832608	2640099-2642732	793017-793579	229793-230910	1496365-1497825	291741-294770	295200-295442	301470-301862	294770-295228	295455-296615	194235-198674	291365-291658	301878-302192	2496325-2499124	328920-330995	2012440-2013263	2026618-2026752	2407951-2408880	2410396-2411373	2409447-2410394	1017014-1017973	2203343-2205763	2692301-2693539	2693805-2694677	2694664-2695716	2693503-2693808	2691577-2692137	1084850-1085902	1082520-1084457	1086111-1086794	1086794-1087870	1087867-1088745	1088758-1089723
Ge354	65	2662229-2664547	2544418-2545947	28785-29301	29469-30155	30158-30922	30942-32765	32755-33783	33796-34905	34909-36033	40155-41360	41371-41928	41928-42815	42869-44131	44208-45353	-	729482-731901	2534712-2537345	692360-692922	126967-128084	1396801-1398261	188915-191944	192374-192616	198704-199096	191944-192402	192629-193789	195500-199939	188539-188832	199112-199426	2390878-2393677	226154-228229	1906184-1907007	1920482-1920616	2302095-2303024	2304597-2305574	2303648-2304595	1017840-1018799	2097366-2099786	2586913-2588151	2588417-2589289	2589276-2590328	2588115-2588420	2586190-2586749	984428-985480	982038-983975	985689-986372	986372-987448	987445-988323	988336-989301
Ge355	65	2672990-2675308	2555178-2556707	32185-32701	32869-33555	33558-34322	34342-36165	36155-37183	37196-38305	38309-39433	43555-44760	44771-45328	45328-46215	46269-47531	47608-48753	-	730153-732572	2545472-2548105	693056-693618	128138-129255	1397165-1398625	190180-193209	193639-193881	199969-200361	193209-193667	193894-195054	194550-198989	189804-190097	200377-200691	2400898-2403697	227520-229595	1915696-1916519	1929994-1930128	2312416-2313345	2314861-2315838	2313912-2314859	1016831-1017790	2108076-2110496	2597674-2598912	2599178-2600050	2600037-2601089	2598876-2599181	2596950-2597510	985340-986392	982950-984887	986601-987284	987284-988360	988357-989235	989248-990213
Ge356	65	2663007-2665325	2545109-2546638	28887-29403	29571-30257	30260-31024	31044-32867	32857-33885	33898-35007	35011-36135	40257-41462	41473-42030	42030-42917	42971-44233	44310-45455	-	729289-731708	2535403-2538036	692192-692754	127149-128266	1396012-1397472	189230-192259	192689-192931	199019-199411	192259-192717	192944-194104	194442-198881	188854-189147	199427-199741	2391569-2394368	226665-228740	1904435-1905258	1918733-1918867	2297747-2298676	2300192-2301169	2299243-2300190	1017244-1018203	2096351-2098771	2587691-2588929	2589195-2590067	2590054-2591106	2588893-2589198	2586967-2587527	984332-985384	981942-983879	985593-986276	986276-987352	987349-988227	988240-989205
Ge357	65	2671721-2674039	2553909-2555438	28751-29267	29435-30121	30124-30888	30908-32731	32721-33749	33762-34871	34875-35999	40121-41326	41337-41894	41894-42781	42835-44097	44174-45319	-	729430-731849	2544203-2546836	692188-692750	127066-128183	1400748-1402208	189114-192143	192573-192815	198911-199303	192143-192601	192828-193988	300256-304695	188738-189031	199319-199633	2399670-2402469	226479-228554	1914064-1914887	1928378-1928512	2311365-2312294	2313810-2314787	2312861-2313808	1122362-1123321	2106782-2109202	2596405-2597643	2597909-2598781	2598768-2599820	2597607-2597912	2595681-2596241	984621-985673	982223-984160	985882-986565	986565-987641	987638-988516	988529-989494
Ge358	65	2773634-2775952	2655822-2657351	134814-135330	135498-136184	136187-136951	136971-138794	138784-139812	139825-140934	140938-142062	146184-147389	147400-147957	147957-148844	148898-150160	150237-151382	-	834573-836992	2646428-2648749	797484-798046	232992-234109	1502059-1503519	294940-297969	298399-298641	304725-305117	297969-298427	298654-299814	194137-198576	294564-294857	305133-305447	2502376-2505175	332175-334250	2017432-2018255	2031722-2031856	2413754-2414683	2416199-2417176	2415250-2416197	1015872-1016831	2209029-2211449	2698318-2699556	2699822-2700694	2700681-2701733	2699520-2699825	2697594-2698154	1089677-1090729	1087291-1089228	1090938-1091621	1091621-1092697	1092694-1093572	1093585-1094550
Ge359	65	2665529-2667847	2547717-2549246	28743-29259	29427-30113	30116-30880	30900-32723	32713-33741	33754-34863	34867-35991	40113-41318	41329-41886	41886-42773	42827-44089	44166-45311	-	728466-730885	2538011-2540644	691425-691987	126897-128014	1398951-1400411	188845-191874	192304-192546	198606-198998	191874-192332	192559-193719	300098-304537	188469-188762	199014-199328	2394205-2397004	226056-228131	1909591-1910414	1923833-1923967	2305941-2306870	2308386-2309363	2307437-2308384	1122460-1123419	2101479-2103899	2590213-2591451	2591717-2592589	2592576-2593628	2591415-2591720	2589489-2590049	983401-984453	981039-982976	984662-985345	985345-986421	986418-987296	987309-988274
Ge360	65	2775559-2777877	2657747-2659276	134552-135068	135236-135922	135925-136689	136709-138532	138522-139550	139563-140672	140676-141800	145922-147127	147138-147695	147695-148582	148636-149898	149975-151120	-	834834-837253	2648041-2650674	797534-798096	232838-233955	1506078-1507538	294786-297815	298245-298487	304567-304959	297815-298273	298500-299660	300599-305038	294410-294703	304975-305289	2504215-2507014	332083-334158	2018978-2019801	2033260-2033394	2415532-2416461	2418013-2418990	2417064-2418011	1122827-1123786	2210680-2213100	2700243-2701481	2701747-2702619	2702606-2703658	2701445-2701750	2699519-2700079	1089885-1090937	1087503-1089440	1091146-1091829	1091829-1092905	1092902-1093780	1093793-1094758
Ge361	65	2798095-2800413	2680210-2681739	135017-135533	135701-136387	136390-137154	137174-138997	138987-140015	140028-141137	141141-142265	146387-147592	147603-148160	148160-149047	149101-150363	150440-151585	-	835119-837538	2670504-2673137	797790-798352	233327-234444	1502505-1503965	295275-298304	298734-298976	305068-305460	298304-298762	298989-300149	277271-281710	294899-295192	305476-305790	2526472-2529271	332518-334593	2041392-2042215	2055803-2055937	2437918-2438847	2440363-2441340	2439414-2440361	1098789-1099748	2233185-2235605	2722706-2723944	2724210-2725082	2725069-2726121	2723908-2724213	2721982-2722542	1090324-1091376	1087930-1089867	1091585-1092268	1092268-1093344	1093341-1094219	1094232-1095197
Ge362	65	2743497-2745815	2625685-2627214	111779-112295	112463-113149	113152-113916	113936-115759	115749-116777	116790-117899	117903-119027	123149-124354	124365-124922	124922-125809	125863-127125	127202-128347	-	811449-813868	2615979-2618612	774392-774954	210023-211140	1477787-1479247	271971-275000	275430-275672	281740-282132	275000-275458	275685-276845	301229-305668	271595-271888	282148-282462	2472165-2474964	309190-311265	1987198-1988021	2001456-2001590	2383606-2384535	2386051-2387028	2385102-2386049	2485821-2486780	2178897-2181317	2668181-2669419	2669685-2670557	2670544-2671596	2669383-2669688	2667457-2668017	1066310-1067362	1063940-1065877	1067571-1068254	1068254-1069330	1069327-1070205	1070218-1071183
Ge363	65	1580895-1583213	1463008-1464537	135463-135979	136147-136833	136836-137600	137620-139443	139433-140461	140474-141583	141587-142711	146833-148038	148049-148606	148606-149493	149547-150809	150886-152031	-	2772150-2774569	1453302-1455935	798872-799434	233855-234972	2106372-2107832	295917-298946	299376-299618	305698-306090	298946-299404	299631-300791	194587-199026	295541-295834	306106-306420	1309442-1312241	333280-335355	1589031-1589854	838478-838612	1220844-1221773	1223354-1224331	1222474-1223352	1016860-1017819	1015869-1018289	1505579-1506817	1507083-1507955	1507942-1508994	1506781-1507086	1504855-1505415	2518267-2519319	2519765-2521702	2517375-2518058	2516299-2517375	2515424-2516302	2514446-2515411
Ge364	63	2648810-2651128	2530904-2532433	28785-29301	29469-30155	30158-30922	30942-32765	32755-33783	33796-34905	34909-36033	40155-41360	41371-41928	41928-42815	42869-44131	44208-45353	-	729270-731689	2521198-2523831	692102-692664	127323-128440	1396377-1397837	189271-192300	192730-192972	199056-199448	192300-192758	192985-194145	300528-301222	188895-189188	199464-199778	2377364-2380163	226617-228692	1892427-1893250	1906725-1906859	2288778-2289707	2291223-2292200	2290274-2291221	1123018-1123977	2084049-2086469	2573400-2574638	2574904-2575776	2575763-2576815	2574602-2574907	2572676-2573236	984361-985413	981971-983908	985622-986305	986305-987381	987378-988256	988269-989234
Ge365	63	2753934-2756252	2635952-2637481	135086-135602	135770-136456	136459-137223	137243-139066	139056-140084	140097-141206	141210-142334	146456-147661	147672-148229	148229-149116	149170-150432	150509-151654	-	835507-837926	2626246-2628879	798095-798657	233264-234381	1502697-1504157	295212-298241	298671-298913	305057-305449	298241-298699	298926-300086	301353-305027	294836-295129	305465-305779	2482416-2485215	332507-334582	1997543-1998366	2011833-2011967	2393803-2394732	2396248-2397225	2395299-2396246	1118295-1119254	2189139-2191559	2678534-2679772	2680038-2680910	2680897-2681949	2679736-2680041	2677810-2678370	1090451-1091503	1088065-1090002	1091712-1092395	1092395-1093471	1093468-1094346	1094359-1095324
Ge366	65	2793186-2795504	2675374-2676903	134987-135503	135671-136357	136360-137124	137144-138967	138957-139985	139998-141107	141111-142235	146357-147562	147573-148130	148130-149017	149071-150333	150410-151555	-	830674-833093	2665668-2668301	793387-793949	233161-234278	1497685-1499145	295109-298138	298568-298810	304890-305282	298138-298596	298823-299983	300421-304860	294733-295026	305298-305612	2521634-2524433	332340-334415	2036560-2037383	2051054-2051188	2433064-2433993	2435509-2436486	2434560-2435507	1018000-1018959	2228344-2230764	2717870-2719108	2719374-2720246	2720233-2721285	2719072-2719377	2717146-2717706	1085804-1086856	1083422-1085359	1087065-1087748	1087748-1088824	1088821-1089699	1089712-1090677
Ge367	65	2675439-2677757	2557541-2559070	43859-44375	43005-43691	42238-43002	40395-42218	39377-40405	38255-39364	37127-38251	31800-33005	31232-31789	30345-31232	29029-30291	27807-28952	-	730246-732665	2548129-2550468	692713-693275	128255-129372	1397254-1398714	190203-193232	193662-193904	199997-200389	193232-193690	193917-195077	195528-199967	189827-190120	200405-200719	2404002-2406801	227447-229522	1885081-1885904	1899145-1899279	2315416-2316345	2317861-2318838	2316912-2317859	1122983-1123942	2110599-2113019	2600037-2601275	2601541-2602413	2602400-2603452	2601239-2601544	2599313-2599873	985497-986549	983102-985039	986758-987441	987441-988517	988514-989392	989405-990370
Ge368	65	2769931-2772249	2652137-2653666	135203-135719	135887-136573	136576-137340	137360-139183	139173-140201	140214-141323	141327-142451	146573-147778	147789-148346	148346-149233	149287-150549	150626-151771	-	835154-837573	2642725-2645064	797721-798283	233385-234502	1506791-1508251	295408-298437	298867-299109	305197-305589	298437-298895	299122-300282	300728-305167	295032-295325	305605-305919	2498669-2501468	332648-334723	2013538-2014361	2028054-2028188	2410060-2410989	2412505-2413482	2411556-2412503	2485396-2486355	2205331-2207751	2694633-2695871	2696137-2697009	2696996-2698048	2695835-2696140	2693909-2694469	1090391-1091443	1088001-1089938	1091652-1092335	1092335-1093411	1093408-1094286	1094299-1095264
Ge369	65	1470403-1472721	1352536-1354065	28727-29243	29411-30097	30100-30864	30884-32707	32697-33725	33738-34847	34851-35975	40097-41302	41313-41870	41870-42757	42811-44073	44150-45295	-	2772657-2775076	1343124-1345463	691588-692150	126952-128069	2105642-2107102	189012-192041	192471-192713	198793-199185	192041-192499	192726-193886	194324-198763	188636-188929	199201-199515	1199076-1201875	226244-228319	1588679-1589502	728158-728292	1110529-1111458	1112974-1113951	1112025-1112972	1123478-1124437	905677-908097	1395105-1396343	1396609-1397481	1397468-1398520	1396307-1396612	1394381-1394941	2519053-2520105	2520550-2522487	2518161-2518844	2517085-2518161	2516210-2517088	2515232-2516197
Ge370	65	2770847-2773165	2653035-2654564	135073-135589	135757-136443	136446-137210	137230-139053	139043-140071	140084-141193	141197-142321	146443-147648	147659-148216	148216-149103	149157-150419	150496-151641	-	835515-837934	2643623-2645962	798138-798700	233461-234578	1502240-1503700	295409-298438	298868-299110	305195-305587	298438-298896	299123-300283	300726-305165	295033-295326	305603-305917	2499571-2502370	332733-334808	2014875-2015698	2029165-2029299	2411003-2411932	2413448-2414425	2412499-2413446	1123268-1124227	2206542-2208962	2695531-2696769	2697035-2697907	2697894-2698946	2696733-2697038	2694807-2695367	1090859-1091911	1088473-1090410	1092120-1092803	1092803-1093879	1093876-1094754	1094767-1095732
Ge371	65	2777468-2779786	2659656-2661185	135095-135611	135779-136465	136468-137232	137252-139075	139065-140093	140106-141215	141219-142343	146465-147670	147681-148238	148238-149125	149179-150441	150518-151663	-	835424-837818	2650244-2652583	798060-798622	233357-234474	1502304-1503764	295305-298334	298764-299006	305086-305478	298334-298792	299019-300179	300617-305056	294929-295222	305494-305808	2506196-2508995	332640-334715	2020667-2021490	2035027-2035161	2417664-2418593	2420109-2421086	2419160-2420107	1017375-1018334	2212686-2215106	2702152-2703390	2703656-2704528	2704515-2705567	2703354-2703659	2701428-2701988	1090668-1091720	1088286-1090223	1091929-1092612	1092612-1093688	1093685-1094563	1094576-1095541
Ge372	65	2664319-2666637	2546507-2548036	28876-29392	29560-30246	30249-31013	31033-32856	32846-33874	33887-34996	35000-36124	40246-41451	41462-42019	42019-42906	42960-44222	44299-45444	-	729714-732133	2537095-2539434	692289-692851	127313-128430	1396682-1398142	189261-192290	192720-192962	199058-199450	192290-192748	192975-194135	194589-199028	188885-189178	199466-199780	2392939-2395738	226508-228583	1907169-1907992	1921626-1921738	2304200-2305129	2306645-2307622	2305696-2306643	1123308-1124267	2099251-2101671	2589003-2590241	2590507-2591379	2591366-2592418	2590205-2590510	2588279-2588839	984868-985920	982470-984407	986129-986812	986812-987888	987885-988763	988776-989741
Ge373	65	2775094-2777412	2657282-2658811	135320-135836	136004-136690	136693-137457	137477-139300	139290-140318	140331-141440	141444-142568	146690-147895	147906-148463	148463-149350	149404-150666	150743-151888	-	835744-838163	2647870-2650209	798415-798977	233675-234792	1503264-1504724	295623-298652	299082-299324	305416-305808	298652-299110	299337-300497	300947-305386	295247-295540	305824-306138	2503812-2506611	332866-334941	2019526-2020349	2033613-2033747	2415207-2416136	2417652-2418629	2416703-2417650	1016155-1017114	2210474-2212894	2699778-2701016	2701282-2702154	2702141-2703193	2700980-2701285	2699054-2699614	1090805-1091857	1088410-1090347	1092066-1092749	1092749-1093825	1093822-1094700	1094713-1095678
Ge374	65	2664952-2667270	2547059-2548588	28733-29249	29417-30103	30106-30870	30890-32713	32703-33731	33744-34853	34857-35981	40103-41308	41319-41876	41876-42763	42817-44079	44156-45301	-	728651-731070	2537647-2539986	691339-691901	126911-128028	1399606-1401066	188859-191888	192318-192560	198644-199036	191888-192346	192573-193733	194175-198614	188483-188776	199052-199366	2393596-2396395	226094-228169	1908711-1909534	1923001-1923135	2305032-2305961	2307477-2308454	2306528-2307475	1121489-1122448	2100307-2102727	2589555-2590793	2591059-2591931	2591918-2592970	2590757-2591062	2588831-2589391	983660-984712	981274-983211	984921-985604	985604-986680	986677-987555	987568-988533
Ge375	64	2775731-2778049	2657919-2659448	140569-141085	141253-141939	141942-142706	142726-144549	144539-145567	145580-146689	146693-147817	151939-153144	153155-153712	153712-154599	154653-155915	155992-157137	-	836257-838676	2648507-2650846	798956-799518	234785-235902	1501129-1502589	296733-299762	300192-300434	306518-306910	299762-300220	300447-301607	302049-306488	296357-296650	306926-307240	2498807-2501606	333968-336043	1938858-1939040	1995349-1995483	2409869-2410798	2412561-2413538	2411612-2412559	1098698-1099657	2205144-2207564	2700415-2701653	2701919-2702791	2702778-2703830	2701617-2701922	2699691-2700251	1088994-1090046	-	1090255-1090938	1090938-1092014	1092011-1092889	1092902-1093867
Ge377	65	2748250-2750568	2630438-2631967	111469-111985	112153-112839	112842-113606	113626-115449	115439-116467	116480-117589	117593-118717	122839-124044	124055-124612	124612-125499	125553-126815	126892-128037	-	811319-813738	2620732-2623365	774067-774629	209627-210744	1478513-1479973	271575-274604	275034-275276	281340-281732	274604-275062	275289-276449	276871-281310	271199-271492	281748-282062	2476922-2479721	308790-310865	1992128-1992951	2006378-2006512	2388327-2389256	2390772-2391749	2389823-2390770	2472748-2473707	2183683-2186103	2672934-2674172	2674438-2675310	2675297-2676349	2674136-2674441	2672210-2672770	1066223-1067275	1063857-1065794	1067484-1068167	1068167-1069243	1069240-1070118	1070131-1071096
Ge378	65	1569279-1571597	1451467-1452996	124161-124677	124845-125531	125534-126298	126318-128141	128131-129159	129172-130281	130285-131409	135531-136736	136747-137304	137304-138191	138245-139507	139584-140729	-	2758965-2761384	1442055-1444394	787171-787733	222354-223471	2092471-2093931	284302-287331	287761-288003	294103-294495	287331-287789	288016-289176	289634-294073	283926-284219	294511-294825	1297988-1300787	321553-323628	1577442-1578265	827140-827274	1209323-1210252	1211768-1212745	1210819-1211766	1123546-1124505	1004582-1007002	1493963-1495201	1495467-1496339	1496326-1497378	1495165-1495470	1493239-1493799	2505166-2506218	2506683-2508620	2504274-2504957	2503198-2504274	2502323-2503201	2501345-2502310
Ge379	65	2794564-2796882	2676752-2678281	135270-135786	135954-136640	136643-137407	137427-139250	139240-140268	140281-141390	141394-142518	146640-147845	147856-148413	148413-149300	149354-150616	150693-151838	-	835790-838209	2667340-2669679	798442-799004	233625-234742	1503040-1504500	295573-298602	299032-299274	305370-305762	298602-299060	299287-300447	300901-305340	295197-295490	305778-306092	2523276-2526075	332820-334895	2005572-2006395	2019886-2020020	2434614-2435543	2437059-2438036	2436110-2437057	1144262-1145221	2229877-2232297	2719248-2720486	2720752-2721624	2721611-2722663	2720450-2720755	2718524-2719084	1090961-1092013	1088563-1090500	1092222-1092905	1092905-1093981	1093978-1094856	1094869-1095834
Ge380	65	2792550-2794868	2674738-2676267	134759-135275	135443-136129	136132-136896	136916-138739	138729-139757	139770-140879	140883-142007	146129-147334	147345-147902	147902-148789	148843-150105	150182-151327	-	856558-858977	2665326-2667665	819224-819786	232945-234062	1523616-1525076	294893-297922	298352-298594	304687-305079	297922-298380	298607-299767	300218-304657	294517-294810	305095-305409	2521266-2524065	332137-334212	2036162-2036985	2050468-2050602	2432627-2433556	2435072-2436049	2434123-2435070	1178647-1179606	2227806-2230226	2717234-2718472	2718738-2719610	2719597-2720649	2718436-2718741	2716510-2717070	1111759-1112811	1109365-1111302	1113020-1113703	1113703-1114779	1114776-1115654	1115667-1116632
Ge381	65	73666-75984	2711660-2713189	191576-192092	192260-192946	192949-193713	193733-195556	195546-196574	196587-197696	197700-198824	202946-204151	204162-204719	204719-205606	205660-206922	206999-208144	-	893000-895419	2701954-2704587	855631-856193	290224-291341	1557899-1559359	352538-355567	355997-356239	362335-362727	355567-356025	356252-357412	357866-362305	352162-352455	362743-363057	2594292-2597091	389785-391860	2108842-2109665	2123156-2123290	2505790-2506719	2508235-2509212	2507286-2508233	2477915-2478874	2300739-2303159	2754156-2755394	2755660-2756532	2756519-2757571	2755358-2755663	2753432-2753992	1146140-1147192	1143742-1145679	1147401-1148084	1148084-1149160	1149157-1150035	1150048-1151013
Ge382	65	1578227-1580545	1460415-1461944	134474-134990	135158-135844	135847-136611	136631-138454	138444-139472	139485-140594	140598-141722	145844-147049	147060-147617	147617-148504	148558-149820	149897-151042	-	2763867-2766286	1451003-1453342	796912-797474	232648-233765	2098164-2099624	294596-297625	298055-298297	304377-304769	297625-298083	298310-299470	299908-304347	294220-294513	304785-305099	1306895-1309694	331827-333902	1586370-1587193	836737-836871	1218391-1219320	1220836-1221813	1219887-1220834	1123617-1124576	1013670-1016090	1502911-1504149	1504415-1505287	1505274-1506326	1504113-1504418	1502187-1502747	2510313-2511365	2511810-2513747	2509421-2510104	2508345-2509421	2507470-2508348	2506492-2507457
Ge383	65	2775211-2777529	2657399-2658928	135053-135569	135737-136423	136426-137190	137210-139033	139023-140051	140064-141173	141177-142301	146423-147628	147639-148196	148196-149083	149137-150399	150476-151621	-	835675-838094	2647987-2650326	798351-798913	233431-234548	1503288-1504748	295379-298408	298838-299080	305168-305560	298408-298866	299093-300253	300699-305138	295003-295296	305576-305890	2503863-2506662	332618-334693	2019369-2020192	2033425-2033559	2415343-2416272	2417788-2418765	2416839-2417786	1073571-1074530	2210677-2213097	2699895-2701133	2701399-2702271	2702258-2703310	2701097-2701402	2699171-2699731	1091067-1092119	1088676-1090613	1092328-1093007	1093007-1094083	1094080-1094958	1094971-1095936
Ge384	65	2769267-2771585	2651455-2652984	135153-135669	135837-136523	136526-137290	137310-139133	139123-140151	140164-141273	141277-142401	146523-147728	147739-148296	148296-149183	149237-150499	150576-151721	-	785850-788269	2642043-2644382	748563-749125	233327-234444	1453307-1454767	295275-298304	298734-298976	305056-305448	298304-298762	298989-300149	300587-305026	294899-295192	305464-305778	2497920-2500719	332606-334681	2013511-2014334	2027793-2027927	2409302-2410231	2411747-2412724	2410798-2411745	1017818-1018777	2204839-2207259	2693951-2695189	2695455-2696327	2696314-2697366	2695153-2695458	2693227-2693787	1041080-1042132	1038698-1040635	1042341-1043024	1043024-1044100	1044097-1044975	1044988-1045953
Ge385	65	2663582-2665900	2545770-2547299	43716-44232	42862-43548	42095-42859	40252-42075	39234-40262	38112-39221	36984-38108	31657-32862	31089-31646	30202-31089	28886-30148	27664-28809	-	729792-732211	2536358-2538697	692507-693069	128106-129223	1396950-1398410	190054-193083	193513-193755	199836-200228	193083-193541	193768-194928	195367-199806	189678-189971	200244-200558	2392310-2395109	227286-229361	1907731-1908554	1921794-1921928	2303799-2304728	2306244-2307221	2305295-2306242	1123788-1124747	2099084-2101504	2588266-2589504	2589770-2590642	2590629-2591681	2589468-2589773	2587542-2588102	985203-986255	982820-984757	986464-987147	987147-988223	988220-989098	989111-990076
Ge386	65	2773057-2775375	2655085-2656551	135140-135656	135824-136510	136513-137277	137297-139120	139110-140138	140151-141260	141264-142388	146510-147715	147726-148283	148283-149170	149224-150486	150563-151708	-	835796-838215	2645673-2648012	798467-799029	233379-234496	1503043-1504503	295375-298404	298834-299076	305168-305560	298404-298862	299089-300249	300699-305138	294999-295292	305576-305890	2501614-2504413	332717-334792	2017039-2017862	2031345-2031479	2413029-2413958	2415474-2416451	2414525-2415472	992346-993305	2208566-2210986	2697741-2698979	2699245-2700117	2700104-2701156	2698943-2699248	2697017-2697577	1091285-1092337	1088891-1090828	1092546-1093229	1093229-1094305	1094302-1095180	1095193-1096158
Ge387	65	2648315-2650633	2530521-2532050	5499-6015	6183-6869	6872-7636	7656-9479	9469-10497	10510-11619	11623-12747	16869-18074	18085-18642	18642-19529	19583-20845	20922-22067	-	704846-707265	2521109-2523448	667535-668097	103725-104842	1372021-1373481	165673-168702	169132-169374	175458-175850	168702-169160	169387-170547	170989-175428	165297-165590	175866-176180	2377059-2379858	202908-204983	1891829-1892652	1906119-1906253	2288476-2289405	2290921-2291898	2289972-2290919	2487169-2488128	2083751-2086171	2573017-2574255	2574521-2575393	2575380-2576432	2574219-2574524	2572293-2572853	959851-960903	957465-959402	961112-961795	961795-962871	962868-963746	963759-964724
Ge388	65	1473277-1475595	1355465-1356994	28733-29249	29417-30103	30106-30870	30890-32713	32703-33731	33744-34853	34857-35981	40103-41308	41319-41876	41876-42763	42817-44079	44156-45301	-	2773218-2775637	1346053-1348392	691560-692122	126911-128028	2107275-2108735	188859-191888	192318-192560	198644-199036	191888-192346	192573-193733	194175-198614	188483-188776	199052-199366	1202001-1204800	226094-228169	1588104-1588927	731399-731533	1113489-1114418	1115934-1116911	1114985-1115932	1099331-1100290	908705-911125	1397961-1399199	1399465-1400337	1400324-1401376	1399163-1399468	1397237-1397797	2519572-2520624	2521073-2523010	2518680-2519363	2517604-2518680	2516729-2517607	2515751-2516716
Ge389	65	2747465-2749783	2629653-2631182	111768-112284	112452-113138	113141-113905	113925-115748	115738-116766	116779-117888	117892-119016	123138-124343	124354-124911	124911-125798	125852-127114	127191-128336	-	811803-814222	2620241-2622580	774488-775050	210005-211122	1482871-1484331	271953-274982	275412-275654	281742-282134	274982-275440	275667-276827	277273-281712	271577-271870	282150-282464	2476186-2478985	309192-311267	1991421-1992244	2005480-2005614	2387666-2388595	2390111-2391088	2389162-2390109	2482601-2483560	2182802-2185222	2672149-2673387	2673653-2674525	2674512-2675564	2673351-2673656	2671425-2671985	1066832-1067884	1064441-1066378	1068093-1068776	1068776-1069852	1069849-1070727	1070740-1071705
Ge390	65	1473810-1476128	1355998-1357527	43722-44238	42868-43554	42101-42865	40258-42081	39240-40268	38118-39227	36990-38114	31663-32868	31095-31652	30208-31095	28892-30154	27670-28815	-	2768788-2771207	1346586-1348925	692732-693294	128114-129231	2102479-2103939	190062-193091	193521-193763	199847-200239	193091-193549	193776-194936	195378-199817	189686-189979	200255-200569	1202470-1205269	227297-229372	1588683-1589506	732569-732703	1113812-1114741	1116257-1117234	1115308-1116255	1122107-1123066	909349-911769	1398494-1399732	1399998-1400870	1400857-1401909	1399696-1400001	1397770-1398330	2515003-2516055	2516504-2518441	2514111-2514794	2513035-2514111	2512160-2513038	2511182-2512147
Ge391	65	2777279-2779597	2659467-2660996	134820-135336	135504-136190	136193-136957	136977-138800	138790-139818	139831-140940	140944-142068	146190-147395	147406-147963	147963-148850	148904-150166	150243-151388	-	834432-836851	2650055-2652394	797108-797670	233000-234117	1501572-1503032	294948-297977	298407-298649	304737-305129	297977-298435	298662-299822	300268-304707	294572-294865	305145-305459	2506001-2508800	332187-334262	2021638-2022461	2036220-2036354	2417380-2418309	2419825-2420802	2418876-2419823	1017311-1018270	2212651-2215071	2701963-2703201	2703467-2704339	2704326-2705378	2703165-2703470	2701239-2701799	1089608-1090660	1087218-1089155	1090869-1091552	1091552-1092628	1092625-1093503	1093516-1094481
Ge392	65	2662545-2664863	2544733-2546262	29393-29909	30077-30763	30766-31530	31550-33373	33363-34391	34404-35513	35517-36641	40763-41968	41979-42536	42536-43423	43477-44739	44816-45961	-	729514-731933	2535321-2537660	692171-692733	127655-128772	1400950-1402410	189620-192649	193079-193321	199417-199809	192649-193107	193334-194494	194948-199387	189244-189537	199825-200139	2391258-2394057	227106-229181	1906603-1907426	1920917-1921051	2302690-2303619	2305135-2306112	2304186-2305133	1016284-1017243	2097953-2100373	2587229-2588467	2588733-2589605	2589592-2590644	2588431-2588736	2586505-2587065	984730-985782	982332-984269	985991-986674	986674-987750	987747-988625	988638-989603
Ge393	64	2670187-2672505	2552375-2553904	28797-29313	29481-30167	30170-30934	30954-32777	32767-33795	33808-34917	34921-36045	40167-41372	41383-41940	41940-42827	42881-44143	44220-45365	-	728833-731252	2542669-2545302	691465-692027	127063-128180	1395715-1397175	189011-192040	192470-192712	198808-199200	192040-192498	192725-193885	194339-198778	188635-188928	199216-199530	2398827-2401626	226260-228335	1914808-1915631	1929122-1929256	2310519-2311448	2312964-2313941	2312015-2312962	1123001-1123960	2106179-2108599	2594871-2596109	2596375-2597247	2597234-2598286	2596073-2596378	2594147-2594707	983777-984829	981379-983316	985038-985721	985721-986797	986794-987672	987685-988650
Ge394	65	2774500-2776818	2656688-2658217	134985-135501	135669-136355	136358-137122	137142-138965	138955-139983	139996-141105	141109-142233	146355-147560	147571-148128	148128-149015	149069-150331	150408-151553	-	835203-837622	2647276-2649615	797903-798465	233216-234333	1502545-1504005	295164-298193	298623-298865	304945-305337	298193-298651	298878-300038	300476-304915	294788-295081	305353-305667	2503229-2506028	332395-334470	2018748-2019571	2033030-2033164	2414616-2415545	2417061-2418038	2416112-2417059	2385519-2386478	2210076-2212496	2699184-2700422	2700688-2701560	2701547-2702599	2700386-2700691	2698460-2699020	1090462-1091514	1088080-1090017	1091723-1092406	1092406-1093482	1093479-1094357	1094370-1095335
Ge395	65	813314-815632	695502-697031	1933221-1933737	1933905-1934591	1934594-1935358	1935378-1937201	1937191-1938219	1938232-1939341	1939345-1940469	1944591-1945796	1945807-1946364	1946364-1947251	1947305-1948567	1948644-1949789	-	1330697-1333116	686090-688429	929630-930192	569271-570388	930631-932091	631219-634248	634678-634920	1325385-1325777	634248-634706	634933-636093	1325807-1330246	630843-631136	1325055-1325369	2198995-2201794	1296252-1298327	1923818-1924641	1807907-1808041	1175231-1176160	1177676-1178653	1176727-1177674	1123158-1124117	282479-284899	737998-739236	739502-740374	740361-741413	739200-739505	737274-737834	206-1258	2380857-2382794	1467-2150	2150-3226	3223-4101	4114-5079
Ge396	65	2773001-2775319	2655189-2656718	134807-135323	135491-136177	136180-136944	136964-138787	138777-139805	139818-140927	140931-142055	146177-147382	147393-147950	147950-148837	148891-150153	150230-151375	-	834846-837265	2645777-2648116	797524-798086	232989-234106	1502390-1503850	294983-298012	298442-298684	304773-305165	298012-298470	298697-299857	300304-304743	294607-294900	305181-305495	2501721-2504520	332223-334298	2016723-2017546	2031021-2031155	2413201-2414130	2415646-2416623	2414697-2415644	1015332-1016291	2208343-2210763	2697685-2698923	2699189-2700061	2700048-2701100	2698887-2699192	2696961-2697521	1090410-1091462	1088020-1089957	1091671-1092354	1092354-1093430	1093427-1094305	1094318-1095283
Ge397	65	2666620-2668938	2548809-2550338	29253-29769	29937-30623	30626-31390	31410-33233	33223-34251	34264-35373	35377-36501	40623-41828	41839-42396	42396-43283	43337-44599	44676-45821	-	727540-729959	2539397-2541736	690268-690830	127515-128632	1394781-1396241	189463-192492	192922-193164	199240-199632	192492-192950	193177-194337	194771-199210	189087-189380	199648-199962	2395235-2398034	226690-228765	1909973-1910796	1924247-1924381	2306560-2307489	2309005-2309982	2308056-2309003	1045421-1046380	2101724-2104144	2591305-2592543	2592809-2593681	2593668-2594720	2592507-2592812	2590581-2591141	982775-983827	980397-982334	984036-984719	984719-985795	985792-986670	986683-987648
Ge398	65	2699930-2702248	2582118-2583647	56843-57359	57527-58213	58216-58980	59000-60823	60813-61841	61854-62963	62967-64091	68213-69418	69429-69986	69986-70873	70927-72189	72266-73411	-	757370-759789	2572412-2575045	720305-720867	155007-156124	1428453-1429913	216955-219984	220414-220656	226728-227120	219984-220442	220669-221829	222259-226698	216579-216872	227136-227450	2427977-2430776	253667-255742	1943414-1944237	1957682-1957816	2339701-2340630	2342146-2343123	2341197-2342144	993599-994558	2135360-2137780	2624614-2625852	2626118-2626990	2626977-2628029	2625816-2626121	2623890-2624450	1012937-1013989	1010563-1012500	1014198-1014881	1014881-1015957	1015954-1016832	1016845-1017810
Ge399	65	2673175-2675493	2555363-2556892	5517-6033	6201-6887	6890-7654	7674-9497	9487-10515	10528-11637	11641-12765	16887-18092	18103-18660	18660-19547	19601-20863	20940-22085	-	706075-708494	2545951-2548290	668775-669337	103691-104808	1373021-1374481	165879-168908	169338-169580	175661-176053	168908-169366	169593-170753	171192-175631	165503-165796	176069-176383	2401903-2404702	203353-205428	1883031-1883854	1897313-1897447	2313402-2314331	2315847-2316824	2314898-2315845	1123769-1124728	2108682-2111102	2597859-2599097	2599363-2600235	2600222-2601274	2599061-2599366	2597135-2597695	961108-962160	958727-960664	962369-963052	963052-964128	964125-965003	965016-965981
Ge400	65	2777363-2779681	2659503-2661032	135299-135815	135983-136669	136672-137436	137456-139279	139269-140297	140310-141419	141423-142547	146669-147874	147885-148442	148442-149329	149383-150645	150722-151867	-	836287-838706	2650091-2652430	798944-799506	233489-234606	1503017-1504477	295449-298478	298908-299150	305247-305639	298478-298936	299163-300323	300778-305217	295073-295366	305655-305969	2506027-2508826	332955-335030	1986733-1987556	2001047-2001181	2417491-2418420	2419936-2420913	2418987-2419934	1161396-1162355	2212684-2215104	2702047-2703285	2703551-2704423	2704410-2705462	2703249-2703554	2701323-2701883	1091263-1092315	1088865-1090802	1092524-1093207	1093207-1094283	1094280-1095158	1095171-1096136
Ge401	65	71298-73616	2697266-2698795	189190-189706	189874-190560	190563-191327	191347-193170	193160-194188	194201-195310	195314-196438	200560-201765	201776-202333	202333-203220	203274-204536	204613-205758	-	873749-876168	2687560-2690193	852650-853212	287366-288483	1541274-1542734	349314-352343	352773-353015	359099-359491	352343-352801	353028-354188	354630-359069	348938-349231	359507-359821	2544303-2547102	386549-388624	2057192-2058015	2071730-2071864	2450529-2451458	2452974-2453951	2452025-2452972	1124113-1125072	2249034-2251454	2739762-2741000	2741266-2742138	2742125-2743177	2740964-2741269	2739038-2739598	1128901-1129953	1126515-1128452	1130162-1130845	1130845-1131921	1131918-1132796	1132809-1133774
Ge402	61	2690493-2692811	2572681-2574210	162182-162698	162866-163552	163555-164319	164339-166162	166152-167180	167193-168302	168306-169430	173552-174757	174768-175325	175325-176212	176266-177528	177605-178750	-	836382-838801	2563269-2565608	799036-799598	233955-235072	1503725-1505185	295903-298932	299362-299604	305700-306092	298932-299390	299617-300777	301231-305670	295527-295820	306108-306422	2419205-2422004	333406-335481	2020062-2020885	2034376-2034510	-	-	1114452-1115399	2483204-2484163	2211730-2214150	2615177-2616415	2616681-2617553	2617540-2618592	2616379-2616684	2614453-2615013	1091606-1092658	1089208-1091145	1092867-1093550	1093550-1094626	1094623-1095501	1095514-1096479
Ge403	65	1472890-1475208	1355078-1356607	28066-28582	28750-29436	29439-30203	30223-32046	32036-33064	33077-34186	34190-35314	39436-40641	40652-41209	41209-42096	42150-43412	43489-44634	-	2769365-2771784	1345666-1348005	690960-691522	126369-127486	2103314-2104774	188317-191346	191776-192018	198098-198490	191346-191804	192031-193191	193629-198068	187941-188234	198506-198820	1201555-1204354	225548-227623	1587677-1588500	730783-730917	1112956-1113885	1115401-1116378	2304858-2305805	1017771-1018730	908073-910494	1397574-1398812	1399078-1399950	1399937-1400989	1398776-1399081	1396850-1397410	2515602-2516654	2517099-2519036	2514710-2515393	2513634-2514710	2512759-2513637	2511781-2512746
Ge404	65	2663315-2665633	2545433-2546962	29393-29909	30077-30763	30766-31530	31550-33373	33363-34391	34404-35513	35517-36641	40763-41968	41979-42536	42536-43423	43477-44739	44816-45961	-	730263-732682	2536021-2538360	692915-693477	127583-128700	1397387-1398847	189589-192618	193048-193290	199386-199778	192618-193076	193303-194463	194917-199356	189213-189506	199794-200108	2391957-2394756	226836-228911	1906703-1907526	1921017-1921151	2303362-2304291	2305807-2306784	2357248-2358195	1061932-1062891	2098628-2101048	2587999-2589237	2589503-2590375	2590362-2591414	2589201-2589506	2587275-2587835	985264-986316	982866-984803	986525-987208	987208-988284	988281-989159	989172-990137
Ge405	63	2715916-2718234	2597594-2599123	87075-87591	87759-88445	88448-89212	89232-91055	91045-92073	92086-93195	93199-94323	98445-99650	99661-100218	100218-101105	101159-102421	102498-103643	-	773389-775808	2587888-2590521	736286-736848	185521-186638	1441748-1443208	247469-250498	250928-251170	257261-257653	250498-250956	251183-252343	252792-257231	247093-247386	257669-257983	2444050-2446849	284711-286786	1944790-1945613	1973621-1973755	2355752-2356681	2358197-2359174	2383890-2384837	1099084-1100043	2150903-2153323	2640600-2641838	2642104-2642976	2642963-2644015	2641802-2642107	2639876-2640436	1029432-1030484	1026674-1028611	1030693-1031376	1031376-1032452	1032449-1033327	1033340-1034305
Ge406	65	2742182-2744500	2624370-2625899	110687-111203	111371-112057	112060-112824	112844-114667	114657-115685	115698-116807	116811-117935	122057-123262	123273-123830	123830-124717	124771-126033	126110-127255	-	811490-813909	2614958-2617297	773931-774493	208864-209981	1478443-1479903	270812-273841	274271-274513	280597-280989	273841-274299	274526-275686	276128-280567	270436-270729	281005-281319	2470906-2473705	308047-310122	1953466-1954289	1967756-1967890	2382394-2383323	2384839-2385816	1117006-1117953	2488507-2489466	2177596-2180016	2666866-2668104	2668370-2669242	2669229-2670281	2668068-2668373	2666142-2666702	1066589-1067641	1064203-1066140	1067850-1068533	1068533-1069609	1069606-1070484	1070497-1071462
Ge407	65	1475283-1477601	1357471-1359000	44366-44882	43512-44198	42745-43509	40902-42725	39884-40912	38762-39871	37634-38758	32307-33512	31739-32296	30852-31739	29536-30798	28314-29459	-	2774572-2776991	1348059-1350398	693599-694161	128756-129873	2108829-2110289	190704-193733	194163-194405	200485-200877	193733-194191	194418-195578	196016-200455	190328-190621	200893-201207	1204011-1206810	228177-230252	1590003-1590826	733500-733634	1115510-1116439	1117955-1118932	1223574-1224521	2485846-2486805	910790-913210	1399967-1401205	1401471-1402343	1402330-1403382	1401169-1401474	1399243-1399803	2520905-2521957	2522402-2524339	2520013-2520696	2518937-2520013	2518062-2518940	2517084-2518049
Ge408	65	1582055-1584373	1464243-1465772	150144-150660	149290-149976	148523-149287	146680-148503	145662-146690	144540-145649	143412-144536	138085-139290	137517-138074	136630-137517	135314-136576	134092-135237	-	2772020-2774439	1454831-1457170	799784-800346	234542-235659	2105743-2107203	296490-299519	299949-300191	306287-306679	299519-299977	300204-301364	301818-306257	296114-296407	306695-307009	1310723-1313522	334111-336186	1590214-1591037	839657-839791	1222078-1223007	1224523-1225500	2351928-2352875	1078516-1079475	1017108-1019528	1506739-1507977	1508243-1509115	1509102-1510154	1507941-1508246	1506015-1506575	2518260-2519312	2519773-2521710	2517368-2518051	2516292-2517368	2515417-2516295	2514439-2515404
Ge409	63	2711623-2713941	2593811-2595340	91973-92489	92657-93343	93346-94110	94130-95953	95943-96971	96984-98093	98097-99221	103343-104548	104559-105116	105116-106003	106057-107319	107396-108541	-	789435-791854	2584105-2586738	752354-752916	190245-191362	1457936-1459396	252193-255222	255652-255894	261973-262365	255222-255680	255907-257067	257504-261943	251817-252110	262381-262695	2438946-2441745	289423-291498	1954138-1954961	1968420-1968554	2350432-2351361	2352877-2353854	2499066-2500013	1184176-1185135	2145711-2148131	2636307-2637545	2637811-2638683	2638670-2639722	2637509-2637814	2635583-2636143	1046025-1047077	1043642-1045579	1047286-1047969	1047969-1049045	1049042-1049920	1049933-1050898
Ge410	65	76592-78910	2739567-2741096	194555-195071	195239-195925	195928-196692	196712-198535	198525-199553	199566-200675	200679-201803	205925-207130	207141-207698	207698-208585	208639-209901	209978-211123	-	895685-898104	2730155-2732494	858349-858911	292741-293858	1564052-1565512	354922-357951	358381-358623	364715-365107	357951-358409	358636-359796	360246-364685	354546-354839	365123-365437	2586095-2588894	392165-394240	2101009-2101832	2115315-2115449	2497570-2498499	2500015-2500992	1224669-1225616	2479144-2480103	2293106-2295526	1276-2514	2780-3652	3639-4691	2478-2783	552-1112	1151673-1152725	1149279-1151216	1152934-1153617	1153617-1154693	1154690-1155568	1155581-1156546
Ge411	65	1583072-1585390	1465260-1466789	150520-151036	149666-150352	148899-149663	147056-148879	146038-147066	144916-146025	143788-144912	138461-139666	137893-138450	137006-137893	135690-136952	134468-135613	-	2764922-2767341	1455848-1458187	799915-800477	234916-236033	2099413-2100873	296864-299893	300323-300565	306657-307049	299893-300351	300578-301738	302188-306627	296488-296781	307065-307379	1311788-1314587	334361-336436	1591227-1592050	839769-839903	1223173-1224102	1225618-1226595	2288150-2289097	1014935-1015894	1018441-1020861	1507756-1508994	1509260-1510132	1510119-1511171	1508958-1509263	1507032-1507592	2511440-2512492	2512949-2514886	2510548-2511231	2509472-2510548	2508597-2509475	2507619-2508584
Ge412	63	2646285-2648603	2528473-2530002	28773-29289	29457-30143	30146-30910	30930-32753	32743-33771	33784-34893	34897-36021	40143-41348	41359-41916	41916-42803	42857-44119	44196-45341	-	727622-730041	2518767-2521400	690554-691116	126947-128064	1394363-1395823	188895-191924	192354-192596	198676-199068	191924-192382	192609-193769	194207-198646	188519-188812	199084-199398	2374941-2377740	226126-228201	1890811-1891634	1905093-1905227	2286654-2287583	2289099-2290076	2342438-2343385	1016139-1017098	2082106-2084526	2570969-2572207	2572473-2573345	2573332-2574384	2572171-2572476	2570245-2570805	982559-983611	980177-982114	983820-984503	984503-985579	985576-986454	986467-987432
Ge413	65	2701155-2703473	2583343-2584872	28749-29265	29433-30119	30122-30886	30906-32729	32719-33747	33760-34869	34873-35997	40119-41324	41335-41892	41892-42779	42833-44095	44172-45317	-	728591-731010	2573637-2576270	691542-692104	126905-128022	1399238-1400698	188853-191882	192312-192554	198618-199010	191882-192340	192567-193727	194149-198588	188477-188770	199026-199340	2429210-2432009	226068-228143	1945403-1946226	1959653-1959787	2340942-2341871	2343387-2344364	2313724-2314671	993855-994814	2136601-2139021	2625839-2627077	2627343-2628215	2628202-2629254	2627041-2627346	2625115-2625675	983663-984715	981297-983234	984924-985607	985607-986683	986680-987558	987571-988536
Ge414	65	2672118-2674436	2554306-2555835	5521-6037	6205-6891	6894-7658	7678-9501	9491-10519	10532-11641	11645-12769	16891-18096	18107-18664	18664-19551	19605-20867	20944-22089	-	706251-708670	2544894-2547233	668927-669489	103703-104820	1373214-1374695	165651-168680	169110-169352	175440-175832	168680-169138	169365-170525	170971-175410	165275-165568	175848-176162	2400752-2403551	202890-204965	1915808-1916631	1930106-1930240	2312228-2313157	2314673-2315650	2389943-2390890	1016572-1017531	2107428-2109848	2596802-2598040	2598306-2599178	2599165-2600217	2598004-2598309	2596078-2596638	961356-962408	958966-960903	962617-963300	963300-964376	964373-965251	965264-966229
Ge415	62	2748698-2751016	2630787-2632316	95751-96267	96435-97121	97124-97888	97908-99731	99721-100749	100762-101871	101875-102999	107121-108326	108337-108894	108894-109781	109835-111097	111174-112319	-	781975-784394	2621501-2623714	744666-745228	193926-195043	1446973-1448433	255874-258903	259333-259575	265658-266050	258903-259361	259588-260748	261189-265628	255498-255791	266066-266380	2477203-2480002	293191-295266	1977930-1978753	2006398-2006532	2388447-2389376	2390892-2391869	2310945-2311892	2491127-2492086	2183498-2185918	2673400-2674638	2674904-2675776	2675763-2676815	2674602-2674907	2672676-2673236	1036920-1037972	1034533-1036470	1038181-1038864	1038864-1039940	1039937-1040815	1040828-1041793
Ge416	65	2669271-2671589	2551459-2552988	28791-29307	29475-30161	30164-30928	30948-32771	32761-33789	33802-34911	34915-36039	40161-41366	41377-41934	41934-42821	42875-44137	44214-45359	-	728828-731247	2541753-2544386	691730-692292	127052-128169	1395703-1397163	189042-192071	192501-192743	198835-199227	192071-192529	192756-193916	194366-198805	188666-188959	199243-199557	2398087-2400714	226285-228360	1913666-1914489	1927972-1928106	2309449-2310378	2311894-2312871	1158216-1159163	962682-963641	2105108-2107528	2593955-2595193	2595459-2596331	2596318-2597370	2595157-2595462	2593231-2593791	984068-985120	981674-983611	985329-986012	986012-987088	987085-987963	987976-988941
HR522	65	1516723-1519041	1398911-1400440	70572-71088	71256-71942	71945-72709	72729-74552	74542-75570	75583-76692	76696-77820	81942-83147	83158-83715	83715-84602	84656-85918	85995-87140	-	2773950-2776329	1389463-1391838	734013-734575	168798-169915	2111223-2112683	230746-233775	234205-234447	240555-240947	233775-234233	234460-235620	236086-240525	230370-230663	240963-241277	1245070-1247869	268005-270080	1590063-1590886	773676-773810	1156720-1157649	1159165-1160142	2264061-2265008	1013689-1014648	951326-953746	1441407-1442645	1442911-1443783	1443770-1444822	1442609-1442914	1440683-1441243	2523626-2524678	2525151-2527088	2522734-2523417	2521658-2522734	2520783-2521661	2519805-2520770
HR523	53	2623075-2625393	2505263-2506792	-	-	-	-	-	-	-	-	-	-	-	-	-	659757-662176	2495815-2498190	622632-623194	56286-57403	1342368-1343828	118470-121499	121929-122171	128275-128667	121499-121957	122184-123344	123806-128245	118094-118387	128683-128997	2351535-2354334	155725-157800	1865234-1866057	1879564-1879698	2262565-2263494	2265010-2265987	2313977-2314924	945362-946321	2057835-2060255	2547759-2548997	2549263-2550135	2550122-2551174	2548961-2549266	2547035-2547595	930250-931302	927844-929781	931511-932194	932194-933270	933267-934145	934158-935123
HR524	65	2668507-2670825	2550695-2552224	24475-24991	25159-25845	25848-26612	26632-28455	28445-29473	29486-30595	30599-31723	35845-37050	37061-37618	37618-38505	38559-39821	39898-41043	-	725123-727542	2541247-2543622	688011-688573	122664-123781	1392966-1394426	184673-187702	188132-188374	194470-194862	187702-188160	188387-189547	190001-194440	184297-184590	194878-195192	2400787-2403586	221920-223995	1915104-1915927	1929418-1929552	2312481-2313410	2314926-2315903	2247893-2248840	962581-963540	2107760-2110180	2593191-2594429	2594695-2595567	2595554-2596606	2594393-2594698	2592467-2593027	981182-982234	2809585-2811522	982443-983126	983126-984202	984199-985077	985090-986055
HR525	53	2606120-2608438	2488308-2489837	-	-	-	-	-	-	-	-	-	-	-	-	-	642509-644928	2478860-2481235	605424-605986	39723-40840	1328803-1330263	101887-104916	105346-105588	111672-112064	104916-105374	105601-106761	107203-111642	101511-101804	112080-112394	2335303-2338102	139122-141197	1849358-1850181	1863648-1863782	2246397-2247326	2248842-2249819	2262781-2263728	962890-963849	2041687-2044107	2530804-2532042	2532308-2533180	2533167-2534219	2532006-2532311	2530080-2530640	912867-913919	910481-912418	914128-914811	914811-915887	915884-916762	916775-917740
HR526	53	2621667-2623985	2503855-2505384	-	-	-	-	-	-	-	-	-	-	-	-	-	659783-662202	2494407-2496782	622658-623220	56286-57403	1341789-1343249	118470-121499	121929-122171	128275-128667	121499-121957	122184-123344	123806-128245	118094-118387	128683-128997	2350127-2352926	155725-157800	1863973-1864796	1878303-1878437	2261285-2262214	2263730-2264707	2262649-2263596	1037022-1037981	2056483-2058903	2546351-2547589	2547855-2548727	2548714-2549766	2547553-2547858	2545627-2546187	930066-931118	927660-929597	931327-932010	932010-933086	933083-933961	933974-934939
HR527	53	2621553-2623871	2503675-2505204	-	-	-	-	-	-	-	-	-	-	-	-	-	660176-662595	2494227-2496602	623082-623644	56274-57391	1346190-1347650	118446-121475	121905-122147	128239-128631	121475-121933	122160-123320	123770-128209	118070-118363	128647-128961	2349959-2352758	155689-157764	1864034-1864857	1878340-1878474	2261153-2262082	2263598-2264575	2325770-2326717	1017551-1018510	2056435-2058855	2546171-2547409	2547675-2548547	2548534-2549586	2547373-2547678	2545447-2546007	930387-931439	927993-929930	931648-932331	932331-933407	933404-934282	934295-935260
HR528	63	2684319-2686637	2566507-2568036	16848-17364	17532-18218	18221-18985	19005-20828	20818-21846	21859-22968	22972-24096	28218-29423	29434-29991	29991-30878	30932-32194	32271-33416	-	717781-720200	2557077-2559434	680712-681274	115022-116139	1415980-1417440	177182-180211	180641-180883	186963-187355	180211-180669	180896-182056	182494-186933	176806-177099	187371-187685	2412563-2415362	214413-216488	1925804-1926627	1940086-1940220	2324274-2325203	2326719-2327696	2317834-2318781	1135735-1136694	2119313-2121733	2609003-2610241	2610507-2611379	2611366-2612418	2610205-2610510	2608279-2608839	1004531-1005583	1002149-1004086	1005792-1006475	1006475-1007551	1007548-1008426	1008439-1009404
HR529	65	2676137-2678455	2558325-2559854	29377-29893	30061-30747	30750-31514	31534-33357	33347-34375	34388-35497	35501-36625	40747-41952	41963-42520	42520-43407	43461-44723	44800-45945	-	729582-732001	2548877-2551252	692516-693078	127550-128667	1396772-1398232	189498-192527	192957-193199	199279-199671	192527-192985	193212-194372	194810-199249	189122-189415	199687-200001	2404621-2407420	226729-228804	1919802-1920625	1934084-1934218	2316338-2317267	2318783-2319760	2437303-2438250	1014951-1015910	2111375-2113795	2600821-2602059	2602325-2603197	2603184-2604236	2602023-2602328	2600097-2600657	985060-986112	2817098-2819035	986321-987004	987004-988080	988077-988955	988968-989933
HR530	65	29658-31976	2678045-2679574	147357-147873	148041-148727	148730-149494	149514-151337	151327-152355	152368-153477	153481-154605	158727-159932	159943-160500	160500-161387	161441-162703	162780-163925	-	847861-850280	2668597-2670972	810505-811067	245648-246765	1515768-1517228	307596-310625	311055-311297	317385-317777	310625-311083	311310-312470	312916-317355	307220-307513	317793-318107	2524102-2526901	344835-346910	2038213-2039036	2052519-2052653	2435807-2436736	2438252-2439229	2317120-2318067	1194613-1195572	2230566-2232986	2720765-2722003	2722269-2723141	2723128-2724180	2721967-2722272	2720041-2720601	1103236-1104288	2819131-2821068	1104497-1105180	1105180-1106256	1106253-1107131	1107144-1108109
HR531	65	2675613-2677931	2557801-2559330	28809-29325	29493-30179	30182-30946	30966-32789	32779-33807	33820-34929	34933-36057	40179-41384	41395-41952	41952-42839	42893-44155	44232-45377	-	730873-733252	2548353-2550728	693748-694310	127116-128233	1394231-1395691	189064-192093	192523-192765	198869-199261	192093-192551	192778-193938	194400-198839	188688-188981	199277-199591	2404221-2406871	226319-228394	1918011-1918834	1932341-1932475	2315624-2316553	2318069-2319046	2495561-2496508	1192207-1193166	2110053-2112473	2600297-2601535	2601801-2602673	2602660-2603712	2601499-2601804	2599573-2600133	982312-983364	979906-981843	983573-984256	984256-985332	985329-986207	986220-987185
HR532	65	85803-88121	2732490-2734019	218825-219341	217971-218657	217204-217968	215361-217184	214343-215371	213221-214330	212093-213217	206766-207971	206198-206755	205311-206198	203995-205257	202773-203918	-	904992-907411	2723042-2725417	867888-868450	303221-304338	1574608-1576068	365169-368198	368628-368870	374962-375354	368198-368656	368883-370043	370493-374932	364793-365086	375370-375684	2582360-2585159	402412-404487	2096749-2097572	2111055-2111189	2494065-2494994	2496510-2497487	2495910-2496857	1018814-1019773	2289167-2291587	10486-11724	11990-12862	12849-13901	11688-11993	9762-10322	1160685-1161737	2800228-2802165	1161946-1162629	1162629-1163705	1163702-1164580	1164593-1165558
HR533	65	85807-88125	2733079-2734608	203506-204022	204190-204876	204879-205643	205663-207486	207476-208504	208517-209626	209630-210754	214876-216081	216092-216649	216649-217536	217590-218852	218929-220074	-	903895-906314	2723631-2726006	866783-867345	301696-302813	1572113-1573573	363644-366673	367103-367345	373441-373833	366673-367131	367358-368518	368972-373411	363268-363561	373849-374163	2582940-2585739	400891-402966	2096940-2097763	2111254-2111388	2494414-2495343	2496859-2497836	2318625-2319572	1998522-1999481	2289166-2291586	10490-11728	11994-12866	12853-13905	11692-11997	9766-10326	1159700-1160752	2800821-2802758	1160961-1161644	1161644-1162720	1162717-1163595	1163608-1164573
HR534	65	2673528-2675846	2555716-2557245	28515-29031	29199-29885	29888-30652	30672-32495	32485-33513	33526-34635	34639-35763	39885-41090	41101-41658	41658-42545	42599-43861	43938-45083	-	-	2546268-2548643	692873-693435	126847-127964	1398289-1399749	188795-191824	192254-192496	198598-198990	191824-192282	192509-193669	194129-198568	188419-188712	199006-199320	2405477-2408276	226048-228123	1919820-1920643	1934152-1934286	2317129-2318058	2319574-2320551	1911505-1912452	1015072-1016031	2112003-2114423	2598212-2599450	2599716-2600588	2600575-2601627	2599414-2599719	2597488-2598048	986299-987351	2814268-2816205	987560-988243	988243-989319	989316-990194	990207-991172
HU578	65	2753986-2756304	2636051-2637580	523581-524097	522727-523413	521960-522724	520117-521940	519099-520127	517977-519086	516849-517973	511522-512727	510954-511511	510067-510954	508751-510013	507529-508674	-	1542914-1545308	2626339-2628978	843536-844098	781677-782794	352499-353959	1466358-1469387	1469817-1470059	1374414-1374806	1469387-1469845	1470072-1471232	1369945-1374384	1465982-1466275	1374822-1375136	921087-923886	1401864-1403939	1661097-1661920	1321235-1321369	1910009-1910938	1912454-1913431	2293178-2294125	1026022-1026981	1705169-1707589	2678667-2679905	2680171-2681043	2681030-2682082	2679869-2680174	2677943-2678503	2070271-2071323	2035585-2037522	2069379-2070062	2068303-2069379	2067428-2068306	2066450-2067415
IT537	63	2651779-2654097	2533967-2535496	28779-29295	29465-30151	30154-30918	30938-32761	32751-33779	33792-34901	34905-36029	40151-41356	41367-41924	41924-42811	42865-44127	44204-45349	-	-	2524261-2526894	693100-693662	126958-128075	1394550-1396010	188906-191935	192365-192607	198692-199084	191935-192393	192620-193780	194223-198662	188530-188823	199100-199414	2380222-2383021	226142-228076	1895561-1896384	1909851-1909985	2291682-2292611	2294127-2295104	2324743-2325690	1081096-1082055	2087158-2089578	2576463-2577701	2577967-2578839	2578826-2579878	2577665-2577970	2575739-2576299	982577-983629	980191-982128	983838-984521	984521-985597	985594-986472	986485-987450
IT538	65	2683194-2685512	2565301-2566830	29401-29917	30087-30773	30776-31540	31560-33383	33373-34401	34414-35523	35527-36651	40773-41978	41989-42546	42546-43433	43487-44749	44826-45971	-	728905-731324	2555595-2558228	692486-693048	127601-128718	1405400-1406860	189549-192578	193008-193250	199354-199746	192578-193036	193263-194423	194885-199324	189173-189466	199762-200076	2411677-2414323	226804-228879	1926631-1927454	1940961-1941095	2323247-2324176	2325692-2326669	2365195-2366142	1017494-1018453	2118434-2120854	2607878-2609116	2609382-2610254	2610241-2611293	2609080-2609385	2607154-2607714	993238-994290	2824622-2826559	994499-995182	995182-996258	996255-997133	997146-998111
IT539	63	2723539-2725857	2605727-2607256	90118-90634	90804-91490	91493-92257	92277-94100	94090-95118	95131-96240	96244-97368	101490-102695	102706-103263	103263-104150	104204-105467	105544-106689	-	782638-785057	2596021-2598654	745557-746119	188294-189411	1460240-1461700	250242-253271	253701-253943	260023-260415	253271-253729	253956-255116	255554-259993	249866-250159	260431-260745	2451987-2454786	287473-289548	1959241-1960064	1981424-1981558	2363699-2364628	2366144-2367121	2297604-2298551	1007522-1008481	2159236-2161656	2648223-2649461	2649727-2650599	2650586-2651638	2649425-2649730	2647499-2648059	1048604-1049656	1046222-1048159	1049865-1050548	1050548-1051624	1051621-1052499	1052512-1053477
IT540	63	2656335-2658653	2538523-2540052	28719-29235	29405-30091	30094-30858	30878-32701	32691-33719	33732-34841	34845-35969	40091-41296	41307-41864	41864-42751	42805-44067	44144-45289	-	728907-731326	2528817-2531450	691802-692364	126907-128024	1396795-1398255	188855-191884	192314-192556	198648-199040	191884-192342	192569-193729	194179-198618	188479-188772	199056-199370	2384539-2387338	226098-228173	1899756-1900579	1914062-1914196	2296108-2297037	2298553-2299530	2296357-2297304	1046820-1047779	2091645-2094065	2581019-2582257	2582523-2583395	2583382-2584434	2582221-2582526	2580295-2580855	984991-986043	2801562-2803499	986252-986935	986935-988011	988008-988886	988899-989864
IT542	63	2654994-2657312	2537182-2538711	17141-17657	17827-18513	18516-19280	19300-21123	21113-22141	22154-23263	23267-24391	28513-29718	29729-30286	30286-31173	31227-32489	32566-33711	-	715950-718369	2527476-2530109	678845-679407	115331-116448	1386988-1388448	177279-180308	180738-180980	187076-187468	180308-180766	180993-182153	182607-187046	176903-177196	187484-187798	2383164-2385963	214525-216600	1898457-1899280	1912771-1912905	2294861-2295790	2297306-2298283	2332171-2333118	1050961-1051920	2090140-2092560	2579678-2580916	2581182-2582054	2582041-2583093	2580880-2581185	2578954-2579514	975077-976129	972679-974616	976338-977021	977021-978097	978094-978972	978985-979950
IT543	63	2691120-2693438	2573308-2574837	28796-29312	29482-30168	30171-30935	30955-32778	32768-33796	33809-34918	34922-36046	40168-41373	41384-41941	41941-42828	42882-44144	44221-45366	-	727632-730051	2563602-2566235	690843-691405	127095-128212	1426707-1428167	189200-192229	192659-192901	198997-199389	192229-192687	192914-194074	194528-198967	188824-189117	199405-199719	2419290-2422089	226447-228522	1934111-1934934	1948425-1948559	2330675-2331604	2333120-2334097	2399488-2400435	1066245-1067204	2125892-2128312	2615804-2617042	2617308-2618180	2618167-2619219	2617006-2617311	2615080-2615640	1014319-1015371	1011921-1013858	1015580-1016263	1016263-1017339	1017336-1018214	1018227-1019192
IT544	65	2753525-2755843	2635713-2637242	126629-127145	125775-126461	125008-125772	123165-124988	122147-123175	121025-122134	119897-121021	114570-115775	114002-114559	113115-114002	111799-113061	110577-111722	-	762973-765392	2626265-2628640	725884-726446	211021-212138	1429941-1431401	272969-275998	276428-276670	282754-283146	275998-276456	276683-277843	278285-282724	272593-272886	283162-283476	2482005-2484804	310204-312279	2001008-2001831	2015298-2015432	2397992-2398921	2400437-2401414	2352024-2352971	1175827-1176786	2192956-2195376	2678209-2679447	2679713-2680585	2680572-2681624	2679411-2679716	2677485-2678045	1018466-1019518	2811618-2813555	1019727-1020410	1020410-1021486	1021483-1022361	1022374-1023339
IT545	63	2710505-2712823	2592693-2594222	5509-6025	6193-6879	6882-7646	7666-9489	9479-10507	10520-11629	11633-12757	16879-18084	18095-18652	18652-19539	19593-20855	20932-22077	-	745653-748072	2583245-2585620	708525-709087	103821-104938	1446988-1448448	165769-168798	169228-169470	175574-175966	168798-169256	169483-170643	171105-175544	165393-165686	175982-176296	2438964-2441763	203024-204958	1954346-1955169	1968676-1968810	2350528-2351457	2352973-2353950	2465560-2466507	1163811-1164770	2146065-2148485	2635189-2636427	2636693-2637565	2637552-2638604	2636391-2636696	2634465-2635025	1033730-1034782	1031326-1033263	1034991-1035674	1035674-1036750	1036747-1037625	1037638-1038603
IT547	63	74232-76550	2706338-2707867	192239-192755	192923-193609	193612-194376	194396-196219	196209-197237	197250-198359	198363-199487	203609-204814	204825-205382	205382-206269	206323-207585	207662-208807	-	876718-879137	2696632-2699265	855611-856173	290425-291542	1555237-1556697	352429-355458	355888-356130	362224-362616	355458-355916	356143-357303	357755-362194	352053-352346	362632-362946	2552586-2555385	389674-391749	2067225-2068048	2081531-2081665	2464064-2464993	2466509-2467486	2453016-2453963	1113635-1114594	2259346-2261766	2748834-2750072	2750338-2751210	2751197-2752249	2750036-2750341	2748110-2748670	1143324-1144376	1140930-1142867	1144585-1145268	1145268-1146344	1146341-1147219	1147232-1148197
IT548	63	50269-52587	2693806-2695335	191591-192107	192275-192961	192964-193728	193748-195571	195561-196589	196602-197711	197715-198839	202961-204166	204177-204734	204734-205621	205675-206937	207014-208159	-	2819789-2822208	2684100-2686733	857084-857646	289781-290898	1543201-1544661	351729-354758	355188-355430	361527-361919	354758-355216	355443-356603	357058-361497	351353-351646	361935-362249	2540050-2542849	388977-390911	2058271-2059094	2069117-2069251	2451520-2452449	2453965-2454942	2385303-2386250	1076369-1077328	2246702-2249122	2736302-2737540	2737806-2738678	2738665-2739717	2737504-2737809	2735578-2736138	1130711-1131763	1128313-1130250	1131972-1132655	1132655-1133731	1133728-1134606	1134619-1135584
IT549	63	2743539-2745857	2625745-2627274	124035-124551	124721-125407	125410-126174	126194-128017	128007-129035	129048-130157	130161-131285	135407-136612	136623-137180	137180-138067	138121-139383	139460-140605	-	825664-828083	2616039-2618672	788595-789157	222211-223328	1493536-1494996	284159-287188	287618-287860	293940-294332	287188-287646	287873-289033	289471-293910	283783-284076	294348-294662	2472005-2474804	321444-323378	1987774-1988597	2002056-2002190	2383807-2384736	2386252-2387229	2375834-2376781	1433672-1434631	2179344-2181764	2668241-2669479	2669745-2670617	2670604-2671656	2669443-2669748	2667517-2668077	1081148-1082200	2788332-2790269	1082409-1083092	1083092-1084168	1084165-1085043	1085056-1086021
IT550	65	2729761-2732079	2611949-2613478	87607-88123	88291-88977	88980-89744	89764-91587	91577-92605	92618-93727	93731-94855	98977-100182	100193-100750	100750-101637	101691-102953	103030-104175	-	787737-790156	2602243-2604876	750399-750961	186259-187376	1455783-1457243	248207-251236	251666-251908	257992-258384	251236-251694	251921-253081	253523-257962	247831-248124	258400-258714	2462620-2465419	285442-287517	1977772-1978595	1992062-1992196	2374338-2375267	2376783-2377760	1132062-1132952	2366923-2367882	2169369-2171789	2654445-2655683	2655949-2656821	2656808-2657860	2655647-2655952	2653721-2654281	1043874-1044926	2812306-2814243	1045135-1045818	1045818-1046894	1046891-1047769	1047782-1048747
IT551	63	688181-690499	806875-808404	1891756-1892272	1890902-1891588	1890135-1890899	1888292-1890115	1887274-1888302	1886152-1887261	1885024-1886148	1879697-1880902	1879129-1879686	1878242-1879129	1876926-1878188	1875704-1876849	-	1697091-1699510	815477-818110	1623175-1623737	176597-177714	1431411-1432871	238545-241574	242004-242246	1439641-1440033	241574-242032	242259-243419	1435172-1439611	238169-238462	1440049-1440363	41733-44532	1467186-1469261	1749452-1750275	875084-875218	1130455-1131384	1132954-1133931	1938020-1938967	2377320-2378279	2666437-2668857	764577-765815	763439-764311	762400-763452	764308-764613	765979-766539	1821704-1822756	1759028-1760965	1820812-1821495	1819736-1820812	1818861-1819739	1817883-1818848
IT552	63	872125-874443	990726-992255	668624-669140	667768-668454	667001-667765	665158-666981	664140-665168	663018-664127	661890-663014	656563-657768	655995-656552	655108-655995	653792-655054	652570-653715	-	2355743-2358162	999328-1001961	1658055-1658617	1188546-1189663	1388616-1390076	1124686-1127715	1124014-1124256	1836495-1836887	1124228-1124686	1122841-1124001	1836917-1841356	1127798-1128091	1836165-1836479	688610-691409	1807362-1809437	1113489-1114312	1853002-1853136	1939534-1940463	1937041-1938018	1495190-1496137	1279101-1280060	2142506-2144926	948521-949759	947383-948255	946344-947396	948252-948557	949923-950483	2779133-2780185	1419230-1421167	2780394-2781077	2781077-2782153	2782150-2783028	2783041-2784006
IT553	65	1888020-1890338	2006630-2008159	1336284-1336800	1336970-1337656	1337659-1338423	1338443-1340266	1340256-1341284	1341297-1342406	1342410-1343534	1347656-1348861	1348872-1349429	1349429-1350316	1350370-1351632	1351709-1352854	-	2379705-2382124	2015232-2017865	674760-675322	103393-104510	962181-963641	724613-727642	723941-724183	2104861-2105253	724155-724613	722768-723928	2100392-2104831	727725-728018	2105269-2105583	1617955-1620754	2132437-2134512	1590013-1590836	1732102-1732236	1493694-1494623	1496139-1497116	2502738-2503685	1135316-1136275	2530844-2533264	1964425-1965663	1963287-1964159	1962248-1963300	1964156-1964461	1965827-1966387	2098808-2099860	2374956-2376893	2097916-2098599	2096840-2097916	2095965-2096843	2094987-2095952
IT554	64	106802-109120	2743543-2745072	224521-225037	225207-225893	225896-226660	226680-228503	228493-229521	229534-230643	230647-231771	235893-237098	237109-237666	237666-238553	238607-239869	239946-241091	-	924936-927355	2733837-2736470	887838-888400	322709-323826	1658628-1660088	384906-387935	388365-388607	394699-395091	387935-388393	388620-389780	390230-394669	384530-384823	395107-395421	2589535-2592334	422149-424224	1216888-1217070	2118722-2118856	2501242-2502171	2503687-2504664	2443914-2444790	1057381-1058340	2296311-2298731	31477-32715	32981-33853	33840-34892	32679-32984	30753-31313	1246423-1247475	-	1247684-1248367	1248367-1249443	1249440-1250318	1250331-1251296
IT555	65	32869-35187	2648412-2649941	150445-150961	151129-151815	151818-152582	152602-154425	154415-155443	155456-156565	156569-157693	161815-163020	163031-163588	163588-164475	164529-165791	165868-167013	-	850758-853177	2638706-2641339	813642-814204	248710-249827	1518198-1519658	310658-313687	314117-314359	320431-320823	313687-314145	314372-315532	315962-320401	310282-310575	320839-321153	2530841-2533640	347972-350047	2045539-2046362	2060149-2060283	2442301-2443230	2444792-2445769	2342415-2343362	2589185-2590144	2237171-2239591	2690908-2692146	2692412-2693284	2693271-2694323	2692110-2692415	2690184-2690744	1102727-1103779	1100353-1102290	1103988-1104671	1104671-1105747	1105744-1106622	1106635-1107600
IT556	63	2701096-2703414	2583278-2584807	82958-83474	83642-84328	84331-85095	85115-86938	86928-87956	87969-89078	89082-90206	94328-95533	95544-96101	96101-96988	97042-98304	98381-99526	-	769301-771738	2573572-2576205	748206-748768	181132-182249	1436977-1438437	243080-246109	246539-246781	252863-253255	246109-246567	246794-247954	248394-252833	242704-242997	253271-253585	2429418-2432217	280313-282247	1944685-1945508	1958967-1959101	2340919-2341848	2343364-2344341	110522-111469	2618403-2619362	2136456-2138876	2625777-2627015	2627281-2628153	2628140-2629192	2626979-2627284	2625053-2625613	1024890-1025942	1022508-1024445	1026151-1026834	1026834-1027910	1027907-1028785	1028798-1029763
IT557	63	821070-823388	939653-941182	2174071-2174587	2174757-2175443	2175446-2176210	2176230-2178053	2178043-2179071	2179084-2180193	2180197-2181321	2185443-2186648	2186659-2187216	2187216-2188103	2188157-2189419	2189496-2190641	-	131-2550	948255-950888	2080600-2081162	387673-388790	478211-479671	449621-452650	453080-453322	2490257-2490649	452650-453108	453335-454495	2485788-2490227	449245-449538	2490665-2490979	2357502-2360301	2517706-2519640	2043794-2044617	2530387-2530521	112036-112965	109543-110520	2121614-2122561	1017076-1018035	315008-317428	897448-898686	896310-897182	895271-896323	897179-897484	898850-899410	1000716-1001768	1163153-1165090	1001977-1002660	1002660-1003736	1003733-1004611	1004624-1005589
IT558	63	1644850-1647168	1763450-1764979	704027-704543	703173-703859	702406-703170	700563-702386	699545-700573	698423-699532	697295-698419	691968-693173	691400-691957	690513-691400	689197-690459	687975-689120	-	2615347-2617766	1772052-1774685	1426396-1426958	122925-124042	283-1743	59065-62094	58393-58635	1248252-1248644	58607-59065	57220-58380	1248674-1253113	62177-62470	1247922-1248236	944922-947721	1215917-1217851	2872518-2873341	842016-842150	2123128-2124057	2120635-2121612	2314018-2314965	287754-288713	1128216-1130636	1721246-1722484	1720108-1720980	1719069-1720121	1720977-1721282	1722648-1723208	990940-991992	2018634-2020571	992201-992884	992884-993960	993957-994835	994848-995813
IT559	65	2672377-2674695	2554565-2556094	29682-30198	30366-31052	31055-31819	31839-33662	33652-34680	34693-35802	35806-36930	41052-42257	42268-42825	42825-43712	43766-45028	45105-46250	-	728944-731363	2545117-2547492	691752-692314	127868-128985	1396688-1398148	189816-192845	193275-193517	199609-200001	192845-193303	193530-194690	195140-199579	189440-189733	200017-200331	2400850-2403649	227059-229134	1915471-1916294	1929841-1929975	2312522-2313451	2314967-2315944	1845123-1846070	1022446-1023405	2107336-2109756	2597061-2598299	2598565-2599437	2599424-2600476	2598263-2598568	2596337-2596897	984573-985625	982179-984116	985834-986517	986517-987593	987590-988468	988481-989446
IT563	65	2625958-2628276	2744559-2746088	1104786-1105302	1105472-1106158	1106161-1106925	1106945-1108768	1108758-1109786	1109799-1110908	1110912-1112036	1116158-1117363	1117374-1117931	1117931-1118818	1118872-1120134	1120211-1121356	-	1712266-1714685	2753161-2755794	2039454-2040016	805020-806137	615534-616994	1767453-1770482	1770912-1771154	1721091-1721483	1770482-1770940	1771167-1772327	1716622-1721061	1767077-1767370	1721499-1721813	2832597-2835396	1748541-1750475	1939574-1940397	955762-955896	1846637-1847566	1844144-1845121	2324096-2325043	2459043-2460002	1208507-1210927	2702354-2703592	2701216-2702088	2700177-2701229	2702085-2702390	2703756-2704316	2903781-2904833	2868515-2870452	2902889-2903572	2901813-2902889	2900938-2901816	2899960-2900925
IT564	65	2682545-2684863	2564733-2566262	29066-29582	29750-30436	30439-31203	31223-33046	33036-34064	34077-35186	35190-36314	40436-41641	41652-42209	42209-43096	43150-44412	44489-45634	-	728887-731306	2555027-2557660	691561-692123	127238-128355	1401702-1403162	189186-192215	192645-192887	198967-199359	192215-192673	192900-194060	194498-198937	188810-189103	199375-199689	2410993-2413792	226417-228492	1925681-1926504	1939963-1940097	2322600-2323529	2325045-2326022	387835-388782	2211695-2212654	2117459-2119879	2607229-2608467	2608733-2609605	2609592-2610644	2608431-2608736	2606505-2607065	989954-991006	987572-989509	991215-991898	991898-992974	992971-993849	993862-994827
IT565	64	1862337-1864655	502025-503554	175756-176272	174900-175586	174133-174897	172290-174113	171272-172300	170150-171259	169022-170146	163695-164900	163127-163684	162240-163127	160924-162186	159702-160847	-	1453718-1456137	510627-513260	2318840-2319402	1345415-1346532	1756957-1758417	564847-567876	564175-564417	2453331-2453723	564389-564847	563002-564162	2453753-2458192	567959-568252	2453001-2453315	2512516-2515315	2424198-2426273	1245379-1245561	347062-347196	386339-387268	388784-389761	950636-951583	2723667-2724626	114989-117409	1787010-1788250	1788516-1789388	1789375-1790427	1788214-1788519	1786288-1786846	334666-335718	-	333774-334457	332698-333774	331823-332701	330845-331810
IT566	65	1552427-1554745	1434541-1436070	2290404-2290920	2289550-2290236	2288783-2289547	2286940-2288763	2285922-2286950	2284800-2285909	2283672-2284796	2278345-2279550	2277777-2278334	2276890-2277777	2275574-2276836	2274352-2275497	-	2126512-2128931	1424835-1427468	2365454-2366016	714150-715267	10088-11548	776098-779127	779557-779799	363004-363396	779127-779585	779812-780972	358535-362974	775722-776015	363412-363726	1308761-1311560	390454-392388	2613661-2614484	2068362-2068496	949140-950069	951585-952562	2676104-2677051	1020021-1020980	101833-104253	1477111-1478349	1478615-1479487	1479474-1480526	1478313-1478618	1476387-1476947	1709126-1710178	2454656-2456593	1708234-1708917	1707158-1708234	1706283-1707161	1705305-1706270
IT567	65	1823596-1825914	1705784-1707313	89598-90114	88744-89430	87977-88741	86134-87957	85116-86144	83994-85103	82866-83990	77539-78744	76971-77528	76084-76971	74768-76030	73546-74691	-	1940259-1942678	1696078-1698711	2404703-2405265	444823-445940	1178669-1180129	506771-509800	510230-510472	245502-245894	509800-510258	510485-511645	245924-250363	506395-506688	245172-245486	1484950-1487749	216369-218444	1852461-1853284	273401-273535	2677618-2678547	2675125-2676102	2320112-2321059	976255-977214	1340842-1343262	1748280-1749518	1749784-1750656	1750643-1751695	1749482-1749787	1747556-1748116	2017372-2018424	2734857-2736794	2016480-2017163	2015404-2016480	2014529-2015407	2013551-2014516
IT568	65	2678671-2680989	2560787-2562316	29084-29600	29768-30453	30456-31220	31240-33063	33053-34081	34094-35203	35207-36331	40453-41658	41669-42226	42226-43113	43167-44429	44506-45651	-	728417-730836	2551081-2553714	691206-691768	127437-128554	1403303-1404763	189484-192513	192943-193185	199277-199669	192513-192971	193198-194358	194808-199247	189108-189401	199685-199999	2407035-2409834	226727-228802	1921689-1922512	1935995-1936129	2318616-2319545	2321061-2322038	2261589-2262536	1110242-1111201	2113537-2115957	2603355-2604593	2604859-2605731	2605718-2606770	2604557-2604862	2602631-2603191	987521-988573	985127-987064	988782-989465	989465-990541	990538-991416	991429-992394
IT569	63	2625915-2628233	2508103-2509632	5509-6025	6193-6879	6882-7646	7666-9489	9479-10507	10520-11629	11633-12757	16879-18084	18095-18652	18652-19539	19593-20855	20932-22077	-	676167-678586	2498655-2501030	655049-655611	103703-104820	1355409-1356869	165651-168680	169110-169352	175458-175850	168680-169138	169365-170525	170989-175428	165275-165568	175866-176180	2348643-2351442	203151-205226	1862612-1863435	1876942-1877076	2260093-2261022	2262538-2263515	2441264-2442211	2421995-2422954	2055593-2058013	2550599-2551837	2552103-2552975	2552962-2554014	2551801-2552106	2549875-2550435	943473-944525	941069-943006	944734-945417	945417-946493	946490-947368	947381-948346
IT570	65	6789-9107	2682209-2683738	124446-124962	125130-125816	125819-126583	126603-128426	128416-129444	129457-130566	130570-131694	135816-137021	137032-137589	137589-138476	138530-139792	139869-141014	-	821824-824243	2672503-2675136	786865-787427	222634-223751	1489377-1490080	284582-287611	288041-288283	294379-294771	287611-288069	288296-289456	289910-294349	284206-284499	294787-295101	2528453-2531252	321829-323904	2043046-2043869	2057360-2057494	2439768-2440697	2442213-2443190	1048101-1049048	1115903-1116862	2234714-2237134	2724706-2725944	2726210-2727082	2727069-2728121	2725908-2726213	2723982-2724542	1077764-1078816	1995354-1997291	1079025-1079708	1079708-1080784	1080781-1081659	1081672-1082637
IT571	65	1435034-1437352	1553636-1555165	443785-444301	442931-443617	442164-442928	440321-442144	439303-440331	438181-439290	437053-438177	431726-432931	431158-431715	430271-431158	428955-430217	427733-428878	-	2054628-2057047	1562238-1564871	2311635-2312197	854150-855267	786577-788037	790290-793319	789618-789860	2681276-2681668	789832-790290	788445-789605	2681698-2686137	793402-793695	2680946-2681260	267666-270465	2652143-2654218	2440031-2440854	930613-930747	1049615-1050544	1047122-1048099	2425534-2426481	1176983-1177942	61161-63581	1511430-1512668	1510292-1511164	1509253-1510305	1511161-1511466	1512832-1513392	969322-970374	2770009-2771946	968430-969113	967354-968430	966479-967357	965501-966466
IT572	65	2784680-2786998	2666649-2668178	114412-114928	115098-115784	115787-116551	116571-118394	118384-119412	119425-120534	120538-121662	125784-126989	127000-127557	127557-128444	128498-129760	129837-130982	-	827286-829698	2656943-2659576	790079-790641	213339-214456	1496681-1498141	275393-278422	278852-279094	284398-284790	278422-278880	-	279929-284368	275017-275310	284806-285120	2512619-2515418	311946-313880	2026959-2027781	2041528-2041662	2424038-2424967	2426483-2427460	2476883-2477830	2714908-2715867	2219303-2221723	2709253-2710491	2710757-2711629	2711616-2712668	2710455-2710760	2708529-2709089	1083090-1084142	1080685-1082622	1084351-1085034	1085034-1086110	1086107-1086985	1086998-1087963
IT573	65	2836034-2838352	2718222-2719751	111884-112400	112570-113256	113259-114023	114043-115866	115856-116884	116897-118006	118010-119134	123256-124461	124472-125029	125029-125916	125970-127232	127309-128454	-	857274-859693	2708516-2711149	819942-820504	210165-211282	1556381-1557841	272113-275142	275572-275814	281910-282302	275142-275600	275827-276987	277441-281880	271737-272030	282318-282632	2563983-2566782	309360-311294	2078776-2079599	2093090-2093224	2475387-2476316	2477832-2478809	625287-626234	2704958-2705917	2270665-2273085	2760718-2761956	2762222-2763094	2763081-2764133	2761920-2762225	2759994-2760554	1144365-1145417	1141967-1143904	1145626-1146309	1146309-1147385	1147382-1148260	1148273-1149238
IT574	65	990885-993203	873073-874602	2524795-2525311	2523939-2524625	2523172-2523936	2521329-2523152	2520311-2521339	2519189-2520298	2518061-2519185	2512734-2513939	2512166-2512723	2511279-2512166	2509963-2511225	2508741-2509886	-	712104-714523	863367-866000	2429257-2429819	316971-318088	1444748-1446208	253111-256140	252439-252681	2206504-2206896	252653-253111	251266-252426	2202035-2206474	256223-256516	2206912-2207226	37282-40081	2233954-2235888	222371-223194	1195940-1196074	623791-624720	626236-627213	79968-80915	1457369-1458329	419391-421811	915569-916807	917073-917945	917932-918984	916771-917076	914845-915405	2025669-2026721	379353-381290	2026930-2027613	2027613-2028689	2028686-2029564	2029577-2030542
IT701	65	2251593-2253911	2133781-2135310	1448480-1448996	1447626-1448312	1446859-1447623	1445016-1446839	1443998-1445026	1442876-1443985	1441748-1442872	1436421-1437626	1435853-1436410	1434966-1435853	1433650-1434912	1432428-1433573	-	980792-983211	2124333-2126708	609349-609911	947156-948273	1944137-1945597	883296-886325	882624-882866	2653924-2654316	882838-883296	881451-882611	2654346-2658785	886408-886701	2653594-2653908	2049907-2052706	2624791-2626866	2554995-2555818	2540403-2540537	78472-79401	80917-81894	1961684-1962631	2784871-2785830	1058460-1060880	2176277-2177515	2177781-2178653	2178640-2179692	2177479-2177784	2175553-2176113	880062-881114	2697984-2699921	879170-879853	878094-879170	877219-878097	876241-877206
IT702	65	1830071-1832389	633317-634846	1072018-1072534	1071164-1071850	1070397-1071161	1068554-1070377	1067536-1068564	1066414-1067523	1065286-1066410	1059959-1061164	1059391-1059948	1058504-1059391	1057188-1058450	1055966-1057111	-	2250385-2252804	623611-626244	2121794-2122356	1589104-1590221	1400851-1402311	29521-32550	32980-33222	1818091-1818483	32550-33008	33235-34395	1818513-1822952	29145-29438	1817761-1818075	131443-134242	2296475-2298550	2824800-2825623	1629155-1629289	1960188-1961117	1962633-1963610	2573234-2574181	1051464-1052423	1107191-1109611	675813-677051	677317-678189	678176-679228	677015-677320	675089-675649	1672591-1673643	2258671-2260608	1671699-1672382	1670623-1671699	1669748-1670626	1668770-1669735
IT703	63	1154837-1157155	1037025-1038554	2805306-2805822	2805990-2806676	2806679-2807443	2807463-2809286	2809276-2810304	2810317-2811426	2811430-2812554	2816676-2817881	2817892-2818449	2818449-2819336	2819390-2820652	2820729-2821874	-	1278769-1281188	1027319-1029952	2059695-2060257	234615-235732	389090-390550	296563-299592	300022-300264	2650855-2651247	299592-300050	300277-301437	2646386-2650825	296187-296480	2651263-2651577	781017-783816	2678305-2680239	2790119-2790942	308908-309042	2571738-2572667	2574183-2575160	2338789-2339736	2450291-2451250	2216887-2219307	1079521-1080759	1081025-1081897	1081884-1082936	1080723-1081028	1078797-1079357	1832235-1833287	229078-231015	1831343-1832026	1830267-1831343	1829392-1830270	1828414-1829379
IT704	63	2697827-2700145	2579755-2581284	17062-17578	17746-18432	18435-19199	19219-21042	21032-22060	22073-23182	23186-24310	28697-29902	29913-30470	30470-31357	31411-32673	32750-33895	-	763063-765482	2570049-2572682	725796-726358	115721-116838	1431634-1433094	177739-180768	181198-181440	187544-187936	180768-181226	181453-182613	183075-187514	177363-177656	187952-188266	2425910-2428709	215235-217169	1941069-1941892	1955398-1955532	2337293-2338222	2339738-2340715	119495-120442	948817-949776	2132678-2135098	2622511-2623749	2624015-2624887	2624874-2625926	2623713-2624018	2621787-2622347	1018819-1019871	2838863-2840800	1020080-1020763	1020763-1021839	1021836-1022714	1022727-1023692
IT705	65	1338934-1341252	1457535-1459064	1067292-1067808	1066438-1067124	1065671-1066435	1063828-1065651	1062810-1063838	1061688-1062797	1060560-1061684	1055233-1056438	1054665-1055222	1053778-1054665	1052462-1053724	1051240-1052385	-	512995-515414	1466137-1468770	1082497-1083059	842041-843158	2453061-2454521	903989-907018	907448-907690	2322772-2323164	907018-907476	907703-908863	2323194-2327633	903613-903906	2322442-2322756	911474-914273	2293639-2295714	2380832-2381655	2154405-2154539	121009-121938	118516-119493	1944834-1945781	2615433-2616392	323981-326401	1415330-1416568	1414192-1415064	1413153-1414205	1415061-1415366	1416732-1417292	1746851-1747903	393132-395069	1748112-1748795	1748795-1749871	1749868-1750746	1750759-1751724
IT707	63	2528671-2530989	2647353-2648882	2780431-2780947	2779577-2780263	2778810-2779574	2776967-2778790	2775949-2776977	2774827-2775936	2773699-2774823	2768372-2769577	2767804-2768361	2766917-2767804	2765601-2766863	2764379-2765524	-	2216156-2218829	2655955-2658588	1465037-1465599	50994-52111	1432485-1433945	112942-115971	116401-116643	124064-124456	115971-116429	116656-117816	119595-124034	112566-112859	124472-124786	510390-513189	151514-153589	1365664-1366487	7354-7488	1946348-1947277	1943855-1944832	1568971-1569918	2131614-2132573	2149400-2151820	2605067-2606305	2603929-2604801	2602890-2603942	2604798-2605103	2606469-2607029	1176414-1177466	2387476-2389413	1177675-1178358	1178358-1179434	1179431-1180309	1180322-1181287
IT708	56	2375920-2378238	2258108-2259637	-	-	-	-	-	-	-	-	-	-	-	-	-	590261-592680	2248402-2251035	2543865-2544427	384659-385776	2051316-2052776	446607-449636	450066-450308	2600707-2601099	449636-450094	450321-451481	2601129-2605568	446231-446524	2600377-2600691	584075-586874	2854133-2856067	338846-339669	316881-317015	1567475-1568404	1569920-1570897	1310133-1311080	2374647-2375606	1362916-1365336	2300604-2301842	2302108-2302980	2302967-2304019	2301806-2302111	2299880-2300440	123953-125005	2664294-2666231	125214-125897	125897-126973	126970-127848	127861-128826
IT709	65	994905-997223	843440-844969	2763285-2763801	2763969-2764655	2764658-2765422	2765442-2767265	2767255-2768283	2768296-2769405	2769409-2770533	2774655-2775860	2775871-2776428	2776428-2777315	2777369-2778631	2778708-2779853	-	1764299-1766718	852042-854675	2351749-2352311	1419143-1420260	694946-696406	1355283-1358312	1354611-1354853	2167948-2168340	1354825-1355283	1353438-1354598	2163479-2167918	1358395-1358688	2168356-2168670	311074-313873	2194887-2196962	2022374-2023197	2039821-2039955	1311647-1312576	1309154-1310131	1101673-1102620	2476627-2477586	179213-181633	919589-920827	921093-921965	921952-923004	920791-921096	918865-919425	2632817-2633869	2601478-2603415	2631925-2632608	2630849-2631925	2629974-2630852	2628996-2629961
IT710	56	1932416-1934734	1814530-1816059	-	-	-	-	-	-	-	-	-	-	-	-	-	2187867-2190286	1805082-1807457	2076462-2077024	150578-151695	960617-962077	86718-89747	86046-86288	1011853-1012245	86260-86718	84873-86033	1012275-1016714	89830-90123	1011523-1011837	220243-223042	2507185-2509119	2391560-2392383	1747748-1747882	1103187-1104116	1100694-1101671	765037-765984	1124844-1125803	1306159-1308579	1857100-1858338	1858604-1859476	1859463-1860515	1858302-1858607	1856376-1856936	326442-327494	2537182-2539119	327703-328386	328386-329462	329459-330337	330350-331315
IT711	63	1366510-1368828	1248698-1250227	2164789-2165305	2163935-2164621	2163168-2163932	2161325-2163148	2160307-2161335	2159185-2160294	2158057-2159181	2152730-2153935	2152162-2152719	2151275-2152162	2149959-2151221	2148737-2149882	-	1957143-1959562	1238992-1241625	2300482-2301044	1102232-1103349	2329585-2331045	1164180-1167209	1167639-1167881	1659714-1660106	1167209-1167667	1167894-1169054	1655245-1659684	1163804-1164097	1660122-1660436	1965475-1968274	1687164-1689098	2085752-2086575	1828626-1828760	763541-764470	765986-766963	2401558-2402505	1728582-1729541	559330-561750	1291194-1292432	1292698-1293570	1293557-1294609	1292396-1292701	1290470-1291030	1037536-1038588	2597449-2599386	1038797-1039480	1039480-1040556	1040553-1041431	1041444-1042409
IT712	63	2760021-2762339	2642227-2643756	136245-136761	136931-137617	137620-138384	138404-140227	140217-141245	141258-142367	142371-143495	147617-148822	148833-149390	149390-150277	150331-151593	151670-152815	-	836516-838935	2632521-2635154	800539-801101	234647-235764	1505093-1506553	296595-299624	300054-300296	306400-306792	299624-300082	300309-301469	301931-306370	296219-296512	306808-307122	2488318-2491117	333849-335783	2002627-2003450	2018475-2018609	2400062-2400991	2402507-2403484	2411493-2412440	1632929-1633888	2195599-2198019	2684723-2685961	2686227-2687099	2687086-2688138	2685925-2686230	2683999-2684559	1092094-1093146	2792789-2794726	1093355-1094038	1094038-1095114	1095111-1095989	1096002-1096967
La001	65	2774830-2777148	2657018-2658547	134489-135005	135173-135859	135862-136626	136646-138469	138459-139487	139500-140609	140613-141737	145859-147064	147075-147632	147632-148519	148573-149835	149912-151057	-	2014117-2016536	2647312-2649945	794858-795420	232615-233732	1349165-1350625	294563-297592	298022-298264	304296-304688	297592-298050	298277-299437	299827-304266	294187-294480	304704-305018	2503534-2506333	331746-333821	829668-830491	2032074-2032208	2409997-2410926	2412442-2413419	2317731-2318678	2489616-2490575	2208772-2211192	2699514-2700752	2701018-2701890	2701877-2702929	2700716-2701021	2698790-2699350	1760932-1761984	1762381-1764318	1760040-1760723	1758964-1760040	1758089-1758967	1757111-1758076
La002	53	2681380-2683698	2563526-2565055	-	-	-	-	-	-	-	-	-	-	-	-	-	1919027-1921446	2553820-2556453	703690-704252	138584-139701	1253082-1254542	200532-203561	203991-204233	210313-210705	203561-204019	204246-205406	205844-210283	200156-200449	210721-211035	2409919-2412718	237763-239838	738837-739660	1937080-1937214	2316235-2317164	2318680-2319657	1156980-1157927	1122787-1123746	2114802-2117222	2606064-2607302	2607568-2608440	2608427-2609479	2607266-2607571	2605340-2605900	1665380-1666432	1666877-1668814	1664488-1665171	1663412-1664488	1662537-1663415	1661559-1662524
La003	65	1515591-1517909	1397779-1399308	70537-71053	71221-71907	71910-72674	72694-74517	74507-75535	75548-76657	76661-77785	81907-83112	83123-83680	83680-84567	84621-85883	85960-87105	-	2775653-2778072	1388055-1390706	733424-733986	168824-169941	2109689-2111149	230868-233897	234327-234569	240649-241041	233897-234355	234582-235742	236180-240619	230492-230785	241057-241371	1244143-1246942	268099-270174	1588756-1589579	773030-773164	1155405-1156334	1157929-1158906	2414164-2415111	1156695-1157654	950441-952861	1440275-1441513	1441779-1442651	1442638-1443690	1441477-1441782	1439551-1440111	2522014-2523066	2523511-2525448	2521122-2521805	2520046-2521122	2519171-2520049	2518193-2519158
La004	65	2777664-2779982	2659852-2661381	142764-143280	143448-144134	144137-144901	144921-146744	146734-147762	147775-148884	148888-150012	154134-155339	155350-155907	155907-156794	156848-158110	158187-159332	-	835372-837791	2650146-2652779	798291-798853	233800-234917	1501852-1503312	295748-298777	299207-299449	305529-305921	298777-299235	299462-300622	301060-305499	295372-295665	305937-306251	2506320-2509119	332979-335054	2019824-2020647	2034106-2034240	2412668-2413597	2415113-2416090	2450266-2451213	1123149-1124108	2211397-2213817	2702348-2703586	2703852-2704724	2704711-2705763	2703550-2703855	2701624-2702184	1090296-1091348	1087914-1089851	1091557-1092240	1092240-1093316	1093313-1094191	1094204-1095169
[truncated: 302 more rows]
[truncated: 20 more columns]

## Sheet: Plasmidfinder_Abricate
Isolate_ID	repA(pLW043)	rep(pTW20)	rep(pKH14)	rep21(pS0385-3)	rep(pKH12)
AT513	-	2807319-2808308	2808326-2808615	2811076-2811217	2812260-2813148
AT514	-	13531-14520	14538-14827	17288-17429	18472-19360
AT515	-	13527-14516	14534-14823	17284-17425	18468-19356
AT516	-	13529-14518	14536-14825	17286-17427	18470-19358
AT517	-	13525-14514	14532-14821	17282-17423	18466-19354		-
AT518	-	2806580-2807569	2807587-2807876	2810337-2810478	2811521-2812409
AT520	-	2809392-2810381	2810399-2810688	2813149-2813290	2814333-2815221
BE601	-	783674-784663	783367-783656	780765-780906	778834-779722
[truncated: 522 more rows]

## Sheet: V588F_mutation
Isolate_ID	Isolation_Date	V588F
[truncated: 530 more rows]

## Sheet: pTW20_1_Mapping
Isolate_ID	Isolation_Date	Aligned Bases	Reference bases	% Aligned Bases
[truncated: 530 more rows]
