# Supplementary material for: Phylogeographical Analysis Reveals the Historic Origin, Emergence, and Evolutionary Dynamics of Methicillin-Resistant Staphylococcus aureus ST228
Source: Front Microbiol. 2020 Aug 26;11:2063. doi: 10.3389/fmicb.2020.02063 (PMC7479193; doi:10.3389/fmicb.2020.02063)
Supplement: TABLE S4 — Marginal likelihood estimation for the 245 MRSA genomes sub-sampled dataset under various coalescent priors using path sampling and stepping stone. [file Table_4.XLSX]

## Sheet: Sheet1
Model Number	Substitution Model	Clock Type	Coalescent Tree Prior	Log PS	1	2	3	4	5	6	7	8	9	10	11	12	13
1	HKY	Strict	Constant Size	-2.68373e+06	0	-5.49906	-177.931	2885.6	-310.321	-264.744	-49.9706	-119.598	-236.34	2835.11	2774.9	-299.458	-620.576
2	HKY	Strict	Bayesian Skyline	-2.68372e+06	5.49906	0	-172.432	2891.1	-304.822	-259.245	-44.4715	-114.099	-230.84	2840.61	2780.4	-293.959	-615.077
3	HKY	Strict	Exponential Growth	-2.68355e+06	177.931	172.432	0	3063.53	-132.39	-86.8127	127.96	58.3329	-58.4085	3013.04	2952.83	-121.527	-442.645
4	HKY	Uncorrelated relaxed	Constant Size	-2.68661e+06	-2885.6	-2891.1	-3063.53	0	-3195.92	-3150.35	-2935.57	-3005.2	-3121.94	-50.493	-110.703	-3185.06	-3506.18
5	HKY	Uncorrelated relaxed	Bayesian Skyline	-2.6831e+06	620.576	615.077	442.645	3506.18	310.254	355.832	570.605	500.978	384.236	3455.68	3395.47	321.118	0
6	HKY	Uncorrelated relaxed	Exponential Growth	-2.68346e+06	264.744	259.245	86.8127	3150.35	-45.5778	0		145.146	28.4042	3099.85	3039.64	-34.7142	-355.832
7	GTR	Strict	Constant Size	-2.68368e+06	49.9706	44.4715	-127.96	2935.57	-260.351	-214.773	0	-69.6275	-186.369	2885.08	2824.87	-249.487	-570.605
8	GTR	Strict	Bayesian Skyline	-2.68361e+06	119.598	114.099	-58.3329	3005.2	-190.723	-145.146	69.6275	0	-116.741	2954.71	2894.5	-179.86	-500.978
9	GTR	Strict	Exponential Growth	-2.68349e+06	236.34	230.84	58.4085	3121.94	-73.982	-28.4042	186.369	116.741	0	3071.45	3011.24	-63.1184	-384.236
10	GTR	Uncorrelated relaxed	Constant Size	-2.68656e+06	-2835.11	-2840.61	-3013.04	50.493	-3145.43	-3099.85	-2885.08	-2954.71	-3071.45	0	-60.2104	-3134.57	-3455.68
11	GTR	Uncorrelated relaxed	Bayesian Skyline	-2.6865e+06	-2774.9	-2780.4	-2952.83	110.703	-3085.22	-3039.64	-2824.87	-2894.5	-3011.24	60.2104	0	-3074.36	-3395.47
12	GTR	Uncorrelated relaxed	Exponential Growth	-2.68343e+06	299.458	293.959	121.527	3185.06	-10.8636	34.7142	249.487	179.86	63.1184	3134.57	3074.36	0	-321.118
Model Number	Substitution Model	Clock Type	Coalescent Tree Prior	Log SS	1	2	3	4	5	6	7	8	9	10	11	12	13
1	HKY	Strict	Constant Size	-2.68373e+06	0	-61.1277	-129.23	2884.9	-257.306	-215.253	-49.0099	-119.509	-173.488	2836.7	2775.84	-266.99	-643.521
2	HKY	Strict	Bayesian Skyline	-2.68367e+06	61.1277	0	-68.1023	2946.03	-196.178	-154.125	12.1178	-58.3811	-112.36	2897.83	2836.97	-205.862	-582.394
3	HKY	Strict	Exponential Growth	-2.6836e+06	129.23	68.1023	0	3014.13	-128.075	-86.0227	80.2201	9.72119	-44.2579	2965.93	2905.07	-137.76	-514.291
4	HKY	Uncorrelated relaxed	Constant Size	-2.68661e+06	-2884.9	-2946.03	-3014.13	0	-3142.21	-3100.16	-2933.91	-3004.41	-3058.39	-48.2021	-109.063	-3151.89	-3528.42
5	HKY	Uncorrelated relaxed	Bayesian Skyline	-2.68308e+06	643.521	582.394	514.291	3528.42	386.216	428.268	594.511	524.012	470.033	3480.22	3419.36	376.531	0
6	HKY	Uncorrelated relaxed	Exponential Growth	-2.68351e+06	215.253	154.125	86.0227	3100.16	-42.0527	0		95.7439	41.7649	3051.95	2991.09	-51.7374	-428.268
7	GTR	Strict	Constant Size	-2.68368e+06	49.0099	-12.1178	-80.2201	2933.91	-208.296	-166.243	0	-70.4989	-124.478	2885.71	2824.85	-217.98	-594.511
8	GTR	Strict	Bayesian Skyline	-2.68361e+06	119.509	58.3811	-9.72119	3004.41	-137.797	-95.7439	70.4989	0	-53.9791	2956.21	2895.35	-147.481	-524.012
9	GTR	Strict	Exponential Growth	-2.68355e+06	173.488	112.36	44.2579	3058.39	-83.8176	-41.7649	124.478	53.9791	0	3010.19	2949.33	-93.5022	-470.033
10	GTR	Uncorrelated relaxed	Constant Size	-2.68657e+06	-2836.7	-2897.83	-2965.93	48.2021	-3094.01	-3051.95	-2885.71	-2956.21	-3010.19	0	-60.8614	-3103.69	-3480.22
11	GTR	Uncorrelated relaxed	Bayesian Skyline	-2.6865e+06	-2775.84	-2836.97	-2905.07	109.063	-3033.14	-2991.09	-2824.85	-2895.35	-2949.33	60.8614	0	-3042.83	-3419.36
12	GTR	Uncorrelated relaxed	Exponential Growth	-2.68346e+06	266.99	205.862	137.76	3151.89	9.68462	51.7374	217.98	147.481	93.5022	3103.69	3042.83	0	-376.531
