# Supplementary material for: Phylogeographical Analysis Reveals the Historic Origin, Emergence, and Evolutionary Dynamics of Methicillin-Resistant Staphylococcus aureus ST228
Source: Front Microbiol. 2020 Aug 26;11:2063. doi: 10.3389/fmicb.2020.02063 (PMC7479193; doi:10.3389/fmicb.2020.02063)
Supplement: TABLE S5 — Mobile genetic elements and repetitive regions identified in the reference genome N315. [file Table_5.XLSX]

## Sheet: N315_MGEs_repetitive_regions
Mobile genetic elements that were previously reported for N315 and their position
	Start	End
SCCmec (Tn554mec)	33692	91384
SaPIn1	2057159	2072272
SaPIn2	436159	465501
SaPIn3	1855378	1881633
phiN315	2005720	2049520
IS1181-1	426680	427999
IS1181-2	678300	679619
IS1181-3	893906	895225
IS1181-4	1139084	1140403
IS1181-5	1761714	1763033
IS1181-6	1914806	1916125
IS1181-7	2134414	2135733
IS1181-8	2566795	2568114
Tn554b1	867008	873352
Tn554a	1684668	1691012
Tn554b2	2198308	2206111
Tn554c	2671339	2677683
Repetitive regions identified in the reference genomes N315
	Start	End
	188314	188442
	340710	340874
	343840	344004
	344844	344992
	345355	345503
	507970	508124
	508179	508468
	511619	511808
	549624	549734
	607249	607374
	611695	611820
	776186	776346
	830909	831158
	874038	874197
	1066550	1066654
	1175212	1175424
	1348628	1348756
	1395280	1395456
	1398974	1399150
	1437124	1437285
	1526091	1526319
	1530213	1530441
	1839322	1839433
	1861270	1861378
	1861415	1861558
	1862147	1862255
	1862292	1862435
	1881989	1882138
	1882421	1882593
	1917257	1917429
	1952177	1952286
	1991916	1992089
	2145383	2145672
	2315641	2315745
	2440666	2440835
	2541543	2541673
	2542669	2542799
	2545558	2545683
	2549833	2549958
	2550728	2550828
	2560430	2560593
	2568843	2568947
	2572493	2572597
